# Supplementary material for: Quantitative Proteome Analysis Reveals Changes in the Protein Landscape During Grape Berry Development With a Focus on Vacuolar Transport Proteins
Source: Front Plant Sci. 2019 May 15;10:641. doi: 10.3389/fpls.2019.00641 (PMC6530609; doi:10.3389/fpls.2019.00641)
Supplement: Supplementary file 2 [file Data_Sheet_1.xlsx]

## Sheet: peptide list
Supplementary Data File 1 - Sheet 1 Peptide list raw data. Column O: PEP, Posterior Error Probability of the identification, this value essentially operates as a p-value, where smaller is more significant.
Proteins	Leading razor protein	Sequence	Length	MS/MS Count	Score	Mass	N-term cleavage window	C-term cleavage window	Start position	End position	Unique (Groups)	Unique (Proteins)	Charges	PEP	Oxidation (M) site IDs	Amino acid before	First amino acid	Second amino acid	Second last amino acid	Last amino acid	Amino acid after	A Count	R Count	N Count	D Count	C Count	Q Count	E Count	G Count	H Count	I Count	L Count	K Count	M Count	F Count	P Count	S Count	T Count	W Count	Y Count	V Count	U Count	Missed cleavages	Intensity	Intensity 30-1	Intensity 30-2	Intensity 30-3	Intensity 52-1	Intensity 52-2
A7NVX9	sp|A7NVX9|METK2_VITVI	TQVTVEYHNDGGAR	14	1	28.283	1545.72	PWLRPDGKTQVTVEYH	YHNDGGARVPIRVHTV	170	183	yes	yes	3	0.032384		K	T	Q	A	R	V	1	1	1	1	0	1	1	2	1	0	0	0	0	0	0	0	2	0	1	2	0	0	6248900	1895900	1436300	0	0	0
A7NVX9	sp|A7NVX9|METK2_VITVI	EHVIKPVIPEK	11	9	105.03	1287.76	DEIAADLKEHVIKPVI	IKPVIPEKYLDEKTIF	212	222	yes	no	2;3	0.00053255		K	E	H	E	K	Y	0	0	0	0	0	0	2	0	1	2	0	2	0	0	2	0	0	0	0	2	0	1	196150000	0	0	734400	6315000	3682100
A7NW79	sp|A7NW79|CSPL7_VITVI	LIAVAGVPVLVSNK	14	15	95.981	1378.85	MVTSVQTKLIAVAGVP	VPVLVSNKAKFQNSPA	69	82	yes	yes	2	6.3728e-06		K	L	I	N	K	A	2	0	1	0	0	0	0	1	0	1	2	1	0	0	1	1	0	0	0	4	0	0	359150000	0	0	0	20303000	14215000
D7TCD0	sp|D7TCD0|MTNA_VITVI	AIGLYGASFLQSHIK	15	1	57.288	1603.87	REDVAANRAIGLYGAS	SFLQSHIKDSKNLSIL	151	165	yes	yes	2	0.0019687		R	A	I	I	K	D	2	0	0	0	0	1	0	2	1	2	2	1	0	1	0	2	0	0	1	0	0	0	4230800	0	0	0	0	0
D7TCD0	sp|D7TCD0|MTNA_VITVI	LTAFELVHDNIPATLIADSAAAALMQAGR	29	4	64.574	2979.55	RPFNQGSRLTAFELVH	AALMQAGRVDAVIVGA	219	247	yes	yes	3	1.5483e-15	72	R	L	T	G	R	V	8	1	1	2	0	1	1	1	1	2	4	0	1	1	1	1	2	0	0	1	0	0	27221000	0	831160	0	10892000	8065700
D7TCD0	sp|D7TCD0|MTNA_VITVI	PTAVNLSDAVTK	12	1	77.776	1214.65	LDYLVTSRPTAVNLSD	NLSDAVTKLKGVISNA	101	112	yes	yes	2	0.00047451		R	P	T	T	K	L	2	0	1	1	0	0	0	0	0	0	1	1	0	0	1	1	2	0	0	2	0	0	9372400	0	0	528110	0	4456800
D7TCD0	sp|D7TCD0|MTNA_VITVI	SVHAEGILLR	10	0	31.758	1093.62	GTALGVIRSVHAEGIL	HAEGILLRAYCTETRP	195	204	yes	yes	3	0.065777		R	S	V	L	R	A	1	1	0	0	0	0	1	1	1	1	2	0	0	0	0	1	0	0	0	1	0	0	35272000	0	1532300	1374400	8758400	10248000
E0CSI1	sp|E0CSI1|MTBC1_VITVI	ELTDALAEAIEAYPK	15	0	37.438	1632.82	IENTAHERELTDALAE	EAIEAYPKTTAVLVRN	182	196	yes	yes	2	0.034169		R	E	L	P	K	T	4	0	0	1	0	0	3	0	0	1	2	1	0	0	1	0	1	0	1	0	0	0	32700000	1098800	0	608380	10312000	0
E0CSI1	sp|E0CSI1|MTBC1_VITVI	LLFGYTNYGDLR	12	24	167.2	1430.72	SGSRLAQRLLFGYTNY	YTNYGDLRKYLCGFFD	425	436	yes	yes	2	3.9045e-35		R	L	L	L	R	K	0	1	1	1	0	0	0	2	0	0	3	0	0	1	0	0	1	0	2	0	0	0	239580000	1609100	2645200	0	28084000	8133400
E0CSI1	sp|E0CSI1|MTBC1_VITVI	LLFGYTNYGDLRK	13	1	91.62	1558.81	SGSRLAQRLLFGYTNY	TNYGDLRKYLCGFFDT	425	437	yes	yes	3	7.7569e-06		R	L	L	R	K	Y	0	1	1	1	0	0	0	2	0	0	3	1	0	1	0	0	1	0	2	0	0	1	45637000	0	0	0	0	3508700
E0CSI1	sp|E0CSI1|MTBC1_VITVI	TGFQNNELEGVVFEDVPEALQK	22	13	79.029	2462.2	QLQGHIWRTGFQNNEL	DVPEALQKWHASGIKV	383	404	yes	yes	2;3	1.0479e-13		R	T	G	Q	K	W	1	0	2	1	0	2	4	2	0	0	2	1	0	2	1	0	1	0	0	3	0	0	167910000	0	0	0	20908000	15802000
F6HDM2	sp|F6HDM2|NNRD_VITVI	AITPTLDLAR	10	0	49.189	1069.61	ADAENILRAITPTLDL	TPTLDLARHKGQAGKI	48	57	yes	yes	2	0.067872		R	A	I	A	R	H	2	1	0	1	0	0	0	0	0	1	2	0	0	0	1	0	2	0	0	0	0	0	73087000	967950	0	0	10586000	11218000
F6HDM2	sp|F6HDM2|NNRD_VITVI	SDLISDGETVNSVGIYGSPR	20	4	60.621	2065	VTILRKGKSDLISDGE	VGIYGSPRRCGGQGDI	251	270	yes	yes	2	2.2097e-09		K	S	D	P	R	R	0	1	1	2	0	0	1	3	0	2	1	0	0	0	1	4	1	0	1	2	0	0	0	0	0	0	0	0
F6HDM2	sp|F6HDM2|NNRD_VITVI	SPTVLGSIAGSALMR	15	20	115.68	1458.79	GDLNISPKSPTVLGSI	IAGSALMRKAASLAFE	306	320	yes	yes	2	1.3736e-16		K	S	P	M	R	K	2	1	0	0	0	0	0	2	0	1	2	0	1	0	1	3	1	0	0	1	0	0	98849000	489320	0	0	9040300	2948200
F6HDM2	sp|F6HDM2|NNRD_VITVI	SYSPELIVHPLLEESYSVR	19	2	61.276	2217.13	KDAAPVIKSYSPELIV	LEESYSVREEDKKAIS	107	125	yes	yes	3	1.996e-05		K	S	Y	V	R	E	0	1	0	0	0	0	3	0	1	1	3	0	0	0	2	4	0	0	2	2	0	0	40750000	0	0	0	0	0
F6HDM2	sp|F6HDM2|NNRD_VITVI	VLTEVVK	7	2	81.784	786.485	DKKAISEKVLTEVVKW	KVLTEVVKWMERFDCL	136	142	yes	yes	2	0.02204		K	V	L	V	K	W	0	0	0	0	0	0	1	0	0	0	1	1	0	0	0	0	1	0	0	3	0	0	39310000	0	0	0	5761400	5473800
F6HDT7	sp|F6HDT7|MTND2_VITVI	DQNDSWIR	8	4	101.25	1032.46	GSGYFDVRDQNDSWIR	DQNDSWIRVWLKKGGM	119	126	yes	yes	2	0.0070674		R	D	Q	I	R	V	0	1	1	2	0	1	0	0	0	1	0	0	0	0	0	1	0	1	0	0	0	0	162290000	6628800	3414100	0	0	17208000
F6HDT7	sp|F6HDT7|MTND2_VITVI	FTLDSNNYIK	10	10	76.85	1213.6	LPAGIYHRFTLDSNNY	LDSNNYIKAMRLFVGD	145	154	yes	yes	2	0.0029671		R	F	T	I	K	A	0	0	2	1	0	0	0	0	0	1	1	1	0	1	0	1	1	0	1	0	0	0	161100000	3084600	2984800	2969500	17165000	18195000
F6HDT7	sp|F6HDT7|MTND2_VITVI	LDADNYETDEELK	13	3	78.814	1553.67	KLGVLSWRLDADNYET	YETDEELKKIREARGY	51	63	yes	yes	2	0.0004954		R	L	D	L	K	K	1	0	1	3	0	0	3	0	0	0	2	1	0	0	0	0	1	0	1	0	0	0	7010300	0	0	0	0	0
F6HDT7	sp|F6HDT7|MTND2_VITVI	LGVLSWR	7	1	58.782	829.481	VSLDQLAKLGVLSWRL	KLGVLSWRLDADNYET	44	50	yes	yes	2	0.074942		K	L	G	W	R	L	0	1	0	0	0	0	0	1	0	0	2	0	0	0	0	1	0	1	0	1	0	0	7491900	0	0	0	0	0
F6HDT7	sp|F6HDT7|MTND2_VITVI	NFFEEHLHTDEEIR	14	2	89.992	1814.82	PNYEEKIKNFFEEHLH	LHTDEEIRYCVAGSGY	93	106	yes	yes	3	2.7331e-09		K	N	F	I	R	Y	0	1	1	1	0	0	4	0	2	1	1	0	0	2	0	0	1	0	0	0	0	0	23777000	0	0	0	0	0
P56648	sp|P56648|RBL_VITVI	DDENVNSQPFMR	12	54	212.93	1450.61	RGGLDFTKDDENVNSQ	VNSQPFMRWRDRFLFC	202	213	yes	no	2	6.104e-98	73	K	D	D	M	R	W	0	1	2	2	0	1	1	0	0	0	0	0	1	1	1	1	0	0	0	1	0	0	3767100000	11128000	12363000	7825700	543310000	349880000
P56648	sp|P56648|RBL_VITVI	GGLDFTKDDENVNSQPFMR	19	88	242.95	2168.98	RAVYECLRGGLDFTKD	VNSQPFMRWRDRFLFC	195	213	yes	no	2;3	7.8919e-269	73	R	G	G	M	R	W	0	1	2	3	0	1	1	2	0	0	1	1	1	2	1	1	1	0	0	1	0	1	3927600000	34452000	22945000	18262000	748840000	429310000
P56648	sp|P56648|RBL_VITVI	LEGEREITLGFVDLLR	16	4	77.221	1859.02	HAGTVVGKLEGEREIT	LGFVDLLRDDFVEKDR	335	350	yes	no	3	5.4446e-05		K	L	E	L	R	D	0	2	0	1	0	0	3	2	0	1	4	0	0	1	0	0	1	0	0	1	0	1	17668000	0	0	0	0	3996700
P56648	sp|P56648|RBL_VITVI	LSGGDHIHAGTVVGK	15	68	226.93	1446.76	RVLAKALRLSGGDHIH	HAGTVVGKLEGEREIT	320	334	yes	no	2;3;4	2.7387e-179		R	L	S	G	K	L	1	0	0	1	0	0	0	4	2	1	1	1	0	0	0	1	1	0	0	2	0	0	7718200000	319340000	255010000	242290000	291150000	158990000
P56648	sp|P56648|RBL_VITVI	LSGGDHIHAGTVVGKLEGER	20	1	126.91	2031.05	RVLAKALRLSGGDHIH	VGKLEGEREITLGFVD	320	339	yes	no	3	9.6191e-46		R	L	S	E	R	E	1	1	0	1	0	0	2	5	2	1	2	1	0	0	0	1	1	0	0	2	0	1	33426000	0	0	0	20580000	0
P56648	sp|P56648|RBL_VITVI	LTYYTPEYETKPTDILAAFR	20	11	145.88	2391.2	KAGVKDYKLTYYTPEY	TDILAAFRVTPQPGVP	22	41	yes	no	3	3.0014e-69		K	L	T	F	R	V	2	1	0	1	0	0	2	0	0	1	2	1	0	1	2	0	4	0	3	0	0	1	130540000	2708000	2836000	3430600	44827000	19549000
P56648	sp|P56648|RBL_VITVI	PTDILAAFR	9	8	155.58	1002.55	YTPEYETKPTDILAAF	TDILAAFRVTPQPGVP	33	41	yes	no	2	1.7323e-13		K	P	T	F	R	V	2	1	0	1	0	0	0	0	0	1	1	0	0	1	1	0	1	0	0	0	0	0	36348000	1028000	1478200	847890	13536000	0
P56648	sp|P56648|RBL_VITVI	TFQGPPHGIQVER	13	82	225.36	1464.75	RIPPAYSKTFQGPPHG	PHGIQVERDKLNKYGR	147	159	yes	no	2;3	1.0263e-147		K	T	F	E	R	D	0	1	0	0	0	2	1	2	1	1	0	0	0	1	2	0	1	0	0	1	0	0	7532000000	66044000	73964000	45931000	1064600000	794000000
P56648	sp|P56648|RBL_VITVI	VTPQPGVPPEEAGAAVAAESSTGTWTTVWTDGLTSLDR	38	7	47.524	3853.86	TDILAAFRVTPQPGVP	DGLTSLDRYKGRCYHI	42	79	yes	no	3;4	5.0728e-11		R	V	T	D	R	Y	5	1	0	2	0	1	3	4	0	0	2	0	0	0	4	3	7	2	0	4	0	0	128490000	4239500	2410400	1599300	36500000	37270000
P56648	sp|P56648|RBL_VITVI	EITLGFVDLLR	11	75	209.85	1274.72	VGKLEGEREITLGFVD	LGFVDLLRDDFVEKDR	340	350	yes	no	2	4.9685e-96		R	E	I	L	R	D	0	1	0	1	0	0	1	1	0	1	3	0	0	1	0	0	1	0	0	1	0	0	8199700000	66694000	23421000	36447000	1663800000	1529700000
P56648	sp|P56648|RBL_VITVI	EITLGFVDLLRDDFVEK	17	43	250.26	2008.05	VGKLEGEREITLGFVD	LRDDFVEKDRSRGIYF	340	356	yes	no	2;3	6.3767e-274		R	E	I	E	K	D	0	1	0	3	0	0	2	1	0	1	3	1	0	2	0	0	1	0	0	2	0	1	504100000	3899400	4144700	1728700	105380000	51070000
P56648	sp|P56648|RBL_VITVI	EITLGFVDLLRDDFVEKDR	19	32	161.86	2279.18	VGKLEGEREITLGFVD	DDFVEKDRSRGIYFTQ	340	358	yes	no	3;4	7.0055e-95		R	E	I	D	R	S	0	2	0	4	0	0	2	1	0	1	3	1	0	2	0	0	1	0	0	2	0	2	516570000	0	0	0	111340000	75948000
P56648	sp|P56648|RBL_VITVI	AMHAVIDR	8	3	53.968	911.465	GLLLHIHRAMHAVIDR	AMHAVIDRQKNHGMHF	296	303	yes	no	2	0.05823		R	A	M	D	R	Q	2	1	0	1	0	0	0	0	1	1	0	0	1	0	0	0	0	0	0	1	0	0	8770000	0	0	0	1031800	1270100
P56648	sp|P56648|RBL_VITVI	DNGLLLHIHR	10	47	214.54	1186.66	TSLAHYCRDNGLLLHI	GLLLHIHRAMHAVIDR	286	295	yes	no	2;3	2.3246e-102		R	D	N	H	R	A	0	1	1	1	0	0	0	1	2	1	3	0	0	0	0	0	0	0	0	0	0	0	2084900000	15147000	22849000	10784000	370220000	412940000
P56648	sp|P56648|RBL_VITVI	EIKFEFPAMDTL	12	6	127.56	1439.7	AAACEVWKEIKFEFPA	EFPAMDTL________	464	475	yes	no	2	3.4772e-24	74	K	E	I	T	L	-	1	0	0	1	0	0	2	0	0	1	1	1	1	2	1	0	1	0	0	0	0	1	82452000	717370	1602400	0	9984000	24647000
P56648	sp|P56648|RBL_VITVI	FEFPAMDTL	9	38	125.25	1069.48	CEVWKEIKFEFPAMDT	EFPAMDTL________	467	475	yes	no	1;2	8.6093e-05	74	K	F	E	T	L	-	1	0	0	1	0	0	1	0	0	0	1	0	1	2	1	0	1	0	0	0	0	0	404950000	3112600	5611900	5248700	102360000	52748000
Q0ZIW0	sp|Q0ZIW0|TI214_VITVI	GIFIIEPIR	9	7	85.676	1056.63	TELMKMKRGIFIIEPI	IFIIEPIRLSVKNDGQ	1715	1723	yes	yes	2	0.0013194		R	G	I	I	R	L	0	1	0	0	0	0	1	1	0	4	0	0	0	1	1	0	0	0	0	0	0	0	19516000	0	0	0	4766300	0
Q0ZIX7	sp|Q0ZIX7|RK2_VITVI	GAIIGDTIVSGTEVPIK	17	0	66.022	1668.93	KRYILHPRGAIIGDTI	SGTEVPIKMGNALPLT	107	123	yes	yes	2	0.00034299		R	G	A	I	K	M	1	0	0	1	0	0	1	3	0	4	0	1	0	0	1	1	2	0	0	2	0	0	22549000	0	0	0	9055900	5380800
Q0ZIX7	sp|Q0ZIX7|RK2_VITVI	GVVMNPVDHPHGGGEGR	17	9	81.656	1713.8	LGKRPVVRGVVMNPVD	PHGGGEGRAPIGRKKP	220	236	yes	yes	3;4	2.1902e-07		R	G	V	G	R	A	0	1	1	1	0	0	1	5	2	0	0	0	1	0	2	0	0	0	0	3	0	0	65564000	502330	0	0	7001100	7275200
Q0ZIX7	sp|Q0ZIX7|RK2_VITVI	IVTIEYDPNR	10	10	72.2	1218.62	NEKDIYGRIVTIEYDP	TIEYDPNRNAYICLIH	76	85	yes	yes	2	0.0043412		R	I	V	N	R	N	0	1	1	1	0	0	1	0	0	2	0	0	0	0	1	0	1	0	1	1	0	0	93121000	2375200	2565700	2053500	14244000	11292000
Q0ZIX7	sp|Q0ZIX7|RK2_VITVI	YSDNLILR	8	1	55.37	992.529	RRSRKRNKYSDNLILR	YSDNLILRRRSK____	263	270	yes	yes	2	0.04893		K	Y	S	L	R	R	0	1	1	1	0	0	0	0	0	1	2	0	0	0	0	1	0	0	1	0	0	0	54745000	0	0	0	0	2068100
Q0ZIY0	sp|Q0ZIY0|RR3_VITVI	AIELTEQADTK	11	1	61.419	1217.61	SFRKAIKKAIELTEQA	LTEQADTKGIQVQIAG	148	158	yes	yes	2	0.0075569		K	A	I	T	K	G	2	0	0	1	0	1	2	0	0	1	1	1	0	0	0	0	2	0	0	0	0	0	22889000	0	0	0	5434700	0
Q0ZIY0	sp|Q0ZIY0|RR3_VITVI	INPLGFR	7	1	67.344	815.465	________________	KINPLGFRLGTTQGHH	5	11	yes	yes	2	0.047521		K	I	N	F	R	L	0	1	1	0	0	0	0	1	0	1	1	0	0	1	1	0	0	0	0	0	0	0	10288000	0	0	0	5431400	0
Q0ZIY0	sp|Q0ZIY0|RR3_VITVI	ISSGVEGIAR	10	9	86.189	987.535	NYVQKNIRISSGVEGI	SGVEGIARIEIQKRID	53	62	yes	yes	2	0.0015175		R	I	S	A	R	I	1	1	0	0	0	0	1	2	0	2	0	0	0	0	0	2	0	0	0	1	0	0	180430000	3906200	4134700	3009100	36185000	34096000
Q0ZIY0	sp|Q0ZIY0|RR3_VITVI	RIEELQMNVQK	11	1	42.083	1386.73	LLVEGKPRRIEELQMN	ELQMNVQKELNYVNRK	91	101	yes	yes	2	0.05202		R	R	I	Q	K	E	0	1	1	0	0	2	2	0	0	1	1	1	1	0	0	0	0	0	0	1	0	1	0	0	0	0	0	0
Q0ZIY0	sp|Q0ZIY0|RR3_VITVI	VPLQTIR	7	2	134.12	825.507	VEWIREGRVPLQTIRA	RVPLQTIRAKIDYCSY	184	190	yes	yes	2	0.0057225		R	V	P	I	R	A	0	1	0	0	0	1	0	0	0	1	1	0	0	0	1	0	1	0	0	1	0	0	205730000	3735700	4477800	2345500	31076000	37874000
Q0ZIY3	sp|Q0ZIY3|RR8_VITVI	DTIADIITSIR	11	3	143.97	1216.67	________________	ADIITSIRNVDMDRKV	4	14	yes	yes	2	3.8944e-20		R	D	T	I	R	N	1	1	0	2	0	0	0	0	0	4	0	0	0	0	0	1	2	0	0	0	0	0	58155000	0	0	0	17559000	7165600
Q0ZIY3	sp|Q0ZIY3|RR8_VITVI	IASTNITENIVK	12	2	64.104	1301.72	MDRKVTVRIASTNITE	NITENIVKILLREGFI	26	37	yes	yes	2	0.0024233		R	I	A	V	K	I	1	0	2	0	0	0	1	0	0	3	0	1	0	0	0	1	2	0	0	1	0	0	46818000	0	0	0	13197000	9650700
Q0ZIY8	sp|Q0ZIY8|PETD_VITVI	KPDLNDPVLR	10	6	68.536	1165.65	________________	DLNDPVLRAKLAKGMG	6	15	yes	yes	2;3	0.015009		K	K	P	L	R	A	0	1	1	2	0	0	0	0	0	0	2	1	0	0	2	0	0	0	0	1	0	1	101150000	0	1013000	0	16292000	19785000
Q0ZIY8	sp|Q0ZIY8|PETD_VITVI	SLTLGLF	7	1	110.56	749.432	GATLPIDKSLTLGLF_	KSLTLGLF________	154	160	yes	yes	1	0.0019439		K	S	L	L	F	-	0	0	0	0	0	0	0	1	0	0	3	0	0	1	0	1	1	0	0	0	0	0	171630000	0	0	0	0	59208000
Q0ZIY9	sp|Q0ZIY9|CYB6_VITVI	IVTGVPEAIPVIGSPLVELLR	21	8	125.79	2171.29	QIGYWAVKIVTGVPEA	SPLVELLRGSASVGQS	150	170	yes	yes	3	1.3147e-74		K	I	V	L	R	G	1	1	0	0	0	0	2	2	0	3	3	0	0	0	3	1	1	0	0	4	0	0	0	0	0	0	0	0
Q0ZIY9	sp|Q0ZIY9|CYB6_VITVI	LEIQAIADDITSK	13	22	176.87	1415.75	VYDWFEERLEIQAIAD	IADDITSKYVPPHVNI	12	24	yes	yes	2	1.1571e-53		R	L	E	S	K	Y	2	0	0	2	0	1	1	0	0	3	1	1	0	0	0	1	1	0	0	0	0	0	285180000	3069600	5663400	5374400	63399000	28037000
Q0ZIY9	sp|Q0ZIY9|CYB6_VITVI	VYDWFEER	8	7	88.819	1142.5	________________	VYDWFEERLEIQAIAD	4	11	yes	yes	2	0.0066217		K	V	Y	E	R	L	0	1	0	1	0	0	2	0	0	0	0	0	0	1	0	0	0	1	1	1	0	0	154580000	0	0	0	68541000	26197000
Q0ZIZ0	sp|Q0ZIZ0|PSBH_VITVI	PKPTTVGELLKPLNSEYGK	19	7	97.384	2070.14	VEGSSRSRPKPTTVGE	PLNSEYGKVAPGWGTT	14	32	yes	yes	3;4	3.6484e-14		R	P	K	G	K	V	0	0	1	0	0	0	2	2	0	0	3	3	0	0	3	1	2	0	1	1	0	2	134960000	0	0	1585500	47259000	45419000
Q0ZIZ0	sp|Q0ZIZ0|PSBH_VITVI	PTTVGELLKPLNSEYGK	17	10	137.73	1844.99	GSSRSRPKPTTVGELL	PLNSEYGKVAPGWGTT	16	32	yes	yes	2;3	9.3199e-47		K	P	T	G	K	V	0	0	1	0	0	0	2	2	0	0	3	2	0	0	2	1	2	0	1	1	0	1	106850000	0	0	0	22869000	11644000
Q0ZIZ3	sp|Q0ZIZ3|PSBB_VITVI	AGSMDNGDGIAVGWLGHPIFR	21	30	238.94	2169.04	PAKGGLFRAGSMDNGD	WLGHPIFRDKEGRELF	327	347	yes	yes	2;3	1.2348e-265	75	R	A	G	F	R	D	2	1	1	2	0	0	0	5	1	2	1	0	1	1	1	1	0	1	0	1	0	0	607940000	2703200	0	1725500	151650000	104410000
Q0ZIZ3	sp|Q0ZIZ3|PSBB_VITVI	AQLGEIFELDR	11	38	219.92	1289.66	TVKKYARRAQLGEIFE	GEIFELDRATLKSDGV	424	434	yes	yes	2	2.8738e-114		R	A	Q	D	R	A	1	1	0	1	0	1	2	1	0	1	2	0	0	1	0	0	0	0	0	0	0	0	3137400000	10880000	32388000	24818000	508230000	143350000
Q0ZIZ3	sp|Q0ZIZ3|PSBB_VITVI	AQLGEIFELDRATLK	15	2	43.557	1702.93	TVKKYARRAQLGEIFE	ELDRATLKSDGVFRSS	424	438	yes	yes	3	0.0050719		R	A	Q	L	K	S	2	1	0	1	0	1	2	1	0	1	3	1	0	1	0	0	1	0	0	0	0	1	13688000	0	0	0	0	0
Q0ZIZ3	sp|Q0ZIZ3|PSBB_VITVI	ATLKSDGVFR	10	1	36.684	1092.59	GEIFELDRATLKSDGV	LKSDGVFRSSPRGWFT	435	444	yes	yes	3	0.068922		R	A	T	F	R	S	1	1	0	1	0	0	0	1	0	0	1	1	0	1	0	1	1	0	0	1	0	1	6825900	0	0	0	0	0
Q0ZIZ3	sp|Q0ZIZ3|PSBB_VITVI	DVFAGIDPDLDAQVEFGTFQK	21	21	112.58	2311.1	HGARTLFRDVFAGIDP	VEFGTFQKLGDPTTRR	477	497	yes	yes	2;3	1.0632e-33		R	D	V	Q	K	L	2	0	0	4	0	2	1	2	0	1	1	1	0	3	1	0	1	0	0	2	0	0	142210000	5854800	4485300	4482900	47560000	29313000
Q0ZIZ3	sp|Q0ZIZ3|PSBB_VITVI	LAFYDYIGNNPAK	13	24	207.88	1484.73	AWSKIPEKLAFYDYIG	YIGNNPAKGGLFRAGS	309	321	yes	yes	2	1.0748e-108		K	L	A	A	K	G	2	0	2	1	0	0	0	1	0	1	1	1	0	1	1	0	0	0	2	0	0	0	836380000	14057000	17586000	12709000	185010000	110430000
Q0ZIZ3	sp|Q0ZIZ3|PSBB_VITVI	MPTFFETFPVVLVDGDGIVR	20	242	171.98	2238.14	GRELFVRRMPTFFETF	VDGDGIVRADVPFRRA	359	378	yes	yes	2;3	1.8367e-108	76	R	M	P	V	R	A	0	1	0	2	0	0	1	2	0	1	1	0	1	3	2	0	2	0	0	4	0	0	2057500000	24444000	29118000	24899000	415280000	323380000
Q0ZIZ3	sp|Q0ZIZ3|PSBB_VITVI	PSLDLPK	7	7	82.716	768.438	FCDERTGKPSLDLPKI	KPSLDLPKIFGIHLFL	131	137	yes	yes	2	0.020847		K	P	S	P	K	I	0	0	0	1	0	0	0	0	0	0	2	1	0	0	2	1	0	0	0	0	0	0	96234000	0	0	0	10185000	12392000
Q0ZIZ3	sp|Q0ZIZ3|PSBB_VITVI	QGMFVIPFMTR	11	133	174.57	1325.66	PVLDPMWRQGMFVIPF	FVIPFMTRLGITNSWG	58	68	yes	yes	2	1.5793e-42	77;78	R	Q	G	T	R	L	0	1	0	0	0	1	0	1	0	1	0	0	2	2	1	0	1	0	0	1	0	0	1794700000	18899000	20908000	11070000	237420000	146330000
Q0ZIZ3	sp|Q0ZIZ3|PSBB_VITVI	RAQLGEIFELDR	12	51	151.08	1445.76	ATVKKYARRAQLGEIF	GEIFELDRATLKSDGV	423	434	yes	yes	2;3	1.732e-22		R	R	A	D	R	A	1	2	0	1	0	1	2	1	0	1	2	0	0	1	0	0	0	0	0	0	0	1	2029900000	16851000	15069000	11186000	339420000	217770000
Q0ZIZ3	sp|Q0ZIZ3|PSBB_VITVI	RMPTFFETFPVVLVDGDGIVR	21	138	144.18	2394.24	EGRELFVRRMPTFFET	VDGDGIVRADVPFRRA	358	378	yes	yes	3	1.1965e-80	76	R	R	M	V	R	A	0	2	0	2	0	0	1	2	0	1	1	0	1	3	2	0	2	0	0	4	0	1	1888100000	13869000	32662000	7861500	393640000	220200000
Q0ZIZ3	sp|Q0ZIZ3|PSBB_VITVI	RVGAGLAENQSLSEAWSK	18	6	115.57	1901.96	YFQQEIYRRVGAGLAE	SLSEAWSKIPEKLAFY	287	304	yes	yes	2;3	4.3385e-21		R	R	V	S	K	I	3	1	1	0	0	1	2	2	0	0	2	1	0	0	0	3	0	1	0	1	0	1	175100000	0	0	0	11771000	15274000
Q0ZIZ3	sp|Q0ZIZ3|PSBB_VITVI	TGKPSLDLPK	10	31	98.156	1054.6	LEIFCDERTGKPSLDL	KPSLDLPKIFGIHLFL	128	137	yes	yes	2;3	0.00019118		R	T	G	P	K	I	0	0	0	1	0	0	0	1	0	0	2	2	0	0	2	1	1	0	0	0	0	1	553910000	12702000	16529000	8177900	54344000	81497000
Q0ZIZ3	sp|Q0ZIZ3|PSBB_VITVI	VGAGLAENQSLSEAWSK	17	16	200.48	1745.86	FQQEIYRRVGAGLAEN	SLSEAWSKIPEKLAFY	288	304	yes	yes	2	2.8316e-137		R	V	G	S	K	I	3	0	1	0	0	1	2	2	0	0	2	1	0	0	0	3	0	1	0	1	0	0	1921800000	19914000	18662000	31983000	361560000	255010000
Q0ZIZ3	sp|Q0ZIZ3|PSBB_VITVI	VHTVVLNDPGR	11	36	188.27	1205.65	________________	VVLNDPGRLISVHIMH	8	18	yes	yes	2;3	3.7845e-94		R	V	H	G	R	L	0	1	1	1	0	0	0	1	1	0	1	0	0	0	1	0	1	0	0	3	0	0	6461000000	68496000	101870000	70923000	1244000000	1345000000
Q0ZIZ3	sp|Q0ZIZ3|PSBB_VITVI	YQWDQGYFQQEIYR	14	69	253.16	1922.86	IELFGPTRYQWDQGYF	YFQQEIYRRVGAGLAE	273	286	yes	yes	2;3	7.9822e-237		R	Y	Q	Y	R	R	0	1	0	1	0	4	1	1	0	1	0	0	0	1	0	0	0	1	3	0	0	0	4256400000	41151000	47048000	27448000	804950000	416370000
Q0ZIZ4	sp|Q0ZIZ4|CLPP_VITVI	NPGEDDISWIDVYNR	15	20	199.15	1791.81	GVPKVPFRNPGEDDIS	SWIDVYNRLYRERLLF	12	26	yes	yes	2	3.3389e-120		R	N	P	N	R	L	0	1	2	3	0	0	1	1	0	2	0	0	0	0	1	1	0	1	1	1	0	0	190740000	3382600	3490500	2188000	48527000	25851000
Q0ZIZ4	sp|Q0ZIZ4|CLPP_VITVI	VMIHQPAAAFYEAQAGEFVMEAEELLK	27	2	58.272	3021.46	RLAFPHARVMIHQPAA	MEAEELLKLREIITKV	123	149	yes	yes	3	1.717e-11		R	V	M	L	K	L	6	0	0	0	0	2	5	1	1	1	2	1	2	2	1	0	0	0	1	2	0	0	8668600	0	0	0	0	6811400
Q0ZJ03	sp|Q0ZJ03|PSBE_VITVI	QGIPLITGR	9	64	156.18	953.566	NEYFTESRQGIPLITG	GIPLITGRFDPLEQLD	61	69	yes	yes	2	1.5409e-13		R	Q	G	G	R	F	0	1	0	0	0	1	0	2	0	2	1	0	0	0	1	0	1	0	0	0	0	0	1659300000	67459000	64794000	52299000	334770000	172790000
Q0ZJ03	sp|Q0ZJ03|PSBE_VITVI	SFADIITSIR	10	40	210.08	1121.61	MSGSTGERSFADIITS	ADIITSIRYWVIHSIT	9	18	yes	yes	2	3.487e-85		R	S	F	I	R	Y	1	1	0	1	0	0	0	0	0	3	0	0	0	1	0	2	1	0	0	0	0	0	1027700000	6188200	13268000	8419400	200710000	10744000
Q0ZJ03	sp|Q0ZJ03|PSBE_VITVI	PNEYFTESR	9	19	203.78	1141.5	YDVFGSPRPNEYFTES	NEYFTESRQGIPLITG	52	60	no	no	2	1.0903e-61		R	P	N	S	R	Q	0	1	1	0	0	0	2	0	0	0	0	0	0	1	1	1	1	0	1	0	0	0	1513900000	31940000	37613000	25211000	239360000	188100000
Q0ZJ04	sp|Q0ZJ04|PSBF_VITVI	TYPIFTVR	8	55	121.09	995.544	________________	TYPIFTVRWLAVHGLA	6	13	yes	yes	2	0.0018345		R	T	Y	V	R	W	0	1	0	0	0	0	0	0	0	1	0	0	0	1	1	0	2	0	1	1	0	0	409590000	5143800	5467400	5159500	59580000	68982000
Q0ZJ07	sp|Q0ZJ07|CYF_VITVI	EKGGYEITIADASDGR	16	10	97.502	1680.8	IVSKIIRKEKGGYEIT	IADASDGRQVVDIIPP	221	236	yes	no	2;3	8.3769e-07		K	E	K	G	R	Q	2	1	0	2	0	0	2	3	0	2	0	1	0	0	0	1	1	0	1	0	0	1	68749000	0	0	0	4606000	12560000
Q0ZJ07	sp|Q0ZJ07|CYF_VITVI	GALNVGAVLILPEGFELAPPDR	22	61	154.34	2247.23	QVLANGKRGALNVGAV	FELAPPDRISPEMKEK	102	123	yes	no	2;3;4	6.3424e-96		R	G	A	D	R	I	3	1	1	1	0	0	2	3	0	1	4	0	0	1	3	0	0	0	0	2	0	0	769500000	6820600	3995000	0	93106000	114830000
Q0ZJ07	sp|Q0ZJ07|CYF_VITVI	GGYEITIADASDGR	14	32	111.12	1423.66	SKIIRKEKGGYEITIA	IADASDGRQVVDIIPP	223	236	yes	no	2	1.4705e-11		K	G	G	G	R	Q	2	1	0	2	0	0	1	3	0	2	0	0	0	0	0	1	1	0	1	0	0	0	291070000	3152400	1831200	1484500	46878000	43301000
Q0ZJ07	sp|Q0ZJ07|CYF_VITVI	IGNLSFQNYR	10	1	46.844	1210.61	ISPEMKEKIGNLSFQN	NLSFQNYRPTKKNILV	132	141	yes	no	2	0.046714		K	I	G	Y	R	P	0	1	2	0	0	1	0	1	0	1	1	0	0	1	0	1	0	0	1	0	0	0	0	0	0	0	0	0
Q0ZJ07	sp|Q0ZJ07|CYF_VITVI	IGNLSFQNYRPTK	13	13	148.52	1536.8	ISPEMKEKIGNLSFQN	FQNYRPTKKNILVIGP	132	144	yes	no	2;3	3.3657e-27		K	I	G	T	K	K	0	1	2	0	0	1	0	1	0	1	1	1	0	1	1	1	1	0	1	0	0	1	355050000	0	2236800	1392000	59696000	50892000
Q0ZJ07	sp|Q0ZJ07|CYF_VITVI	LDQPLTSNPNVGGFGQGDAEIVLQDPLR	28	15	94.96	2949.48	VSEGESIKLDQPLTSN	IVLQDPLRIQGLLFFL	258	285	yes	no	3	7.1677e-39		K	L	D	L	R	I	1	1	2	3	0	3	1	4	0	1	4	0	0	1	3	1	1	0	0	2	0	0	88038000	1974000	0	0	12377000	20321000
Q0ZJ07	sp|Q0ZJ07|CYF_VITVI	NILVIGPVPGQK	12	30	87.878	1233.74	QNYRPTKKNILVIGPV	IGPVPGQKYSEITFPI	146	157	yes	no	2	0.00014939		K	N	I	Q	K	Y	0	0	1	0	0	1	0	2	0	2	1	1	0	0	2	0	0	0	0	2	0	0	367970000	3211100	3451800	2096700	50548000	35494000
Q0ZJ07	sp|Q0ZJ07|CYF_VITVI	QVVDIIPPGPELLVSEGESIK	21	103	134.83	2218.21	IADASDGRQVVDIIPP	VSEGESIKLDQPLTSN	237	257	yes	no	2;3	1.167e-66		R	Q	V	I	K	L	0	0	0	1	0	1	3	2	0	3	2	1	0	0	3	2	0	0	0	3	0	0	1057400000	5866600	5251300	4643100	198970000	132560000
Q0ZJ07	sp|Q0ZJ07|CYF_VITVI	RGALNVGAVLILPEGFELAPPDR	23	3	36.935	2403.33	KQVLANGKRGALNVGA	FELAPPDRISPEMKEK	101	123	yes	no	3	0.00041204		K	R	G	D	R	I	3	2	1	1	0	0	2	3	0	1	4	0	0	1	3	0	0	0	0	2	0	1	19895000	0	0	0	9311100	5785600
Q0ZJ07	sp|Q0ZJ07|CYF_VITVI	SNNTVYNATAAGIVSK	16	32	143.28	1608.81	QIYPDGSKSNNTVYNA	TAAGIVSKIIRKEKGG	201	216	yes	no	2	4.0429e-40		K	S	N	S	K	I	3	0	3	0	0	0	0	1	0	1	0	1	0	0	0	2	2	0	1	2	0	0	348430000	1900100	2505900	2471200	43955000	34277000
Q0ZJ07	sp|Q0ZJ07|CYF_VITVI	VQLSEMNF	8	29	129.77	966.448	LKKKQFEKVQLSEMNF	VQLSEMNF________	313	320	yes	no	1;2	0.0010105	81	K	V	Q	N	F	-	0	0	1	0	0	1	1	0	0	0	1	0	1	1	0	1	0	0	0	1	0	0	321830000	4118500	4103000	3995500	47933000	52143000
Q0ZJ07	sp|Q0ZJ07|CYF_VITVI	YPIYVGGNR	9	14	83.313	1037.53	KKDVHFLKYPIYVGGN	PIYVGGNRGRGQIYPD	181	189	yes	no	2	0.0043744		K	Y	P	N	R	G	0	1	1	0	0	0	0	2	0	1	0	0	0	0	1	0	0	0	2	1	0	0	477060000	3464800	4122700	2614900	62551000	55027000
Q0ZJ07	sp|Q0ZJ07|CYF_VITVI	YSEITFPILSPDPATK	16	31	106.6	1777.91	IGPVPGQKYSEITFPI	LSPDPATKKDVHFLKY	158	173	yes	no	2	1.1374e-11		K	Y	S	T	K	K	1	0	0	1	0	0	1	0	0	2	1	1	0	1	3	2	2	0	1	0	0	0	299410000	2210700	0	0	30709000	39299000
Q0ZJ07	sp|Q0ZJ07|CYF_VITVI	YSEITFPILSPDPATKK	17	6	52.372	1906.01	IGPVPGQKYSEITFPI	SPDPATKKDVHFLKYP	158	174	yes	no	2	0.00018924		K	Y	S	K	K	D	1	0	0	1	0	0	1	0	0	2	1	2	0	1	3	2	2	0	1	0	0	1	12773000	0	0	0	0	0
Q0ZJ07	sp|Q0ZJ07|CYF_VITVI	IPYDMQMK	8	6	58.981	1024.47	TVFEAVVRIPYDMQMK	IPYDMQMKQVLANGKR	86	93	yes	no	2	0.0052334	79;80	R	I	P	M	K	Q	0	0	0	1	0	1	0	0	0	1	0	1	2	0	1	0	0	0	1	0	0	0	147360000	0	0	2322200	26321000	30533000
Q0ZJ11	sp|Q0ZJ11|ACCD_VITVI	NFISDDTFLVR	11	3	69.261	1325.66	LFGIRDIRNFISDDTF	SDDTFLVRDRNGVSYF	74	84	yes	yes	2	0.0031936		R	N	F	V	R	D	0	1	1	2	0	0	0	0	0	1	1	0	0	2	0	1	1	0	0	1	0	0	33361000	0	0	0	11701000	1422700
Q0ZJ11	sp|Q0ZJ11|ACCD_VITVI	TVPEGSQAAEYLFHK	15	4	63.754	1675.82	VIEQTLKKTVPEGSQA	AAEYLFHKGLFDPIVP	443	457	yes	yes	3	0.00024959		K	T	V	H	K	G	2	0	0	0	0	1	2	1	1	0	1	1	0	1	1	1	1	0	1	1	0	0	47467000	913790	0	0	12885000	5780900
Q0ZJ13	sp|Q0ZJ13|ATPB_VITVI	AHGGVSVFGGVGER	14	15	94.717	1327.66	ELINNIAKAHGGVSVF	VFGGVGERTREGNDLY	192	205	yes	yes	2;3	8.5259e-06		K	A	H	E	R	T	1	1	0	0	0	0	1	5	1	0	0	0	0	1	0	1	0	0	0	3	0	0	203300000	7890000	12199000	6362000	45140000	43557000
Q0ZJ13	sp|Q0ZJ13|ATPB_VITVI	ELQDIIAILGLDELSEEDRLTVAR	24	1	22.257	2710.44	KQTLQRYKELQDIIAI	EDRLTVARARKIERFL	400	423	yes	yes	3	0.055607		K	E	L	A	R	A	2	2	0	3	0	1	4	1	0	3	5	0	0	0	0	1	1	0	0	1	0	1	0	0	0	0	0	0
Q0ZJ13	sp|Q0ZJ13|ATPB_VITVI	FLSQPFFVAEVFTGSPGK	18	2	60.621	1957	ARARKIERFLSQPFFV	VFTGSPGKYVGLAETI	430	447	yes	yes	2	0.00033264		R	F	L	G	K	Y	1	0	0	0	0	1	1	2	0	0	1	1	0	4	2	2	1	0	0	2	0	0	23119000	0	0	0	9428000	4783300
Q0ZJ13	sp|Q0ZJ13|ATPB_VITVI	FVQAGSEVSALLGR	14	6	162.37	1432.77	LFIDNIFRFVQAGSEV	EVSALLGRMPSAVGYQ	278	291	yes	yes	2	3.6335e-54		R	F	V	G	R	M	2	1	0	0	0	1	1	2	0	0	2	0	0	1	0	2	0	0	0	2	0	0	288560000	3178200	9423400	8974300	114810000	43907000
Q0ZJ13	sp|Q0ZJ13|ATPB_VITVI	GIYPAVDPLDSTSTMLQPR	19	4	80.316	2060.02	LSRGLAAKGIYPAVDP	TSTMLQPRIVGEEHYE	360	378	yes	yes	2	4.0674e-09		K	G	I	P	R	I	1	1	0	2	0	1	0	1	0	1	2	0	1	0	3	2	2	0	1	1	0	0	28181000	0	0	0	10275000	7844200
Q0ZJ13	sp|Q0ZJ13|ATPB_VITVI	IAQIIGPVLDVAFPPGK	17	12	66.826	1734.01	LEKKNLGRIAQIIGPV	DVAFPPGKMPNIYNAL	23	39	yes	yes	2;3	2.5615e-07		R	I	A	G	K	M	2	0	0	1	0	1	0	2	0	3	1	1	0	1	3	0	0	0	0	2	0	0	89185000	0	0	0	35158000	9357900
Q0ZJ13	sp|Q0ZJ13|ATPB_VITVI	IFNVLGEPVDNLGPVDTR	18	18	145.69	1954.02	VGGATLGRIFNVLGEP	NLGPVDTRTTSPIHRS	110	127	yes	yes	2;3	1.9636e-58		R	I	F	T	R	T	0	1	2	2	0	0	1	2	0	1	2	0	0	1	2	0	1	0	0	3	0	0	354920000	11280000	6731300	8448100	75635000	76540000
Q0ZJ13	sp|Q0ZJ13|ATPB_VITVI	INPTTSGPGVSTLEK	15	6	85.469	1499.78	________________	PGVSTLEKKNLGRIAQ	3	17	yes	yes	2	5.7841e-05		R	I	N	E	K	K	0	0	1	0	0	0	1	2	0	1	1	1	0	0	2	2	3	0	0	1	0	0	54821000	0	1526200	0	20031000	13671000
Q0ZJ13	sp|Q0ZJ13|ATPB_VITVI	IVGEEHYETAQR	12	4	156.14	1430.68	TSTMLQPRIVGEEHYE	EHYETAQRVKQTLQRY	379	390	yes	yes	2;3	7.0444e-28		R	I	V	Q	R	V	1	1	0	0	0	1	3	1	1	1	0	0	0	0	0	0	1	0	1	1	0	0	18044000	9022300	9021800	0	0	0
Q0ZJ13	sp|Q0ZJ13|ATPB_VITVI	MPSAVGYQPTLSTEMGTLQER	21	2	37.884	2295.09	EVSALLGRMPSAVGYQ	EMGTLQERITSTKEGS	292	312	yes	yes	2;3	0.003396		R	M	P	E	R	I	1	1	0	0	0	2	2	2	0	0	2	0	2	0	2	2	3	0	1	1	0	0	30623000	170130	0	0	12265000	8787100
Q0ZJ13	sp|Q0ZJ13|ATPB_VITVI	VALVYGQMNEPPGAR	15	15	115.06	1600.8	EKNISESKVALVYGQM	MNEPPGARMRVGLTAL	232	246	yes	yes	2	1.93e-16	87	K	V	A	A	R	M	2	1	1	0	0	1	1	2	0	0	1	0	1	0	2	0	0	0	1	2	0	0	73933000	2556400	4910000	2871200	22566000	14821000
Q0ZJ13	sp|Q0ZJ13|ATPB_VITVI	VGLTALTMAEYFR	13	18	158.58	1470.75	EPPGARMRVGLTALTM	LTMAEYFRDVNEQDVL	249	261	yes	yes	2	8.3707e-36	88	R	V	G	F	R	D	2	1	0	0	0	0	1	1	0	0	2	0	1	1	0	0	2	0	1	1	0	0	265310000	5965000	6557200	6849800	92296000	46975000
Q0ZJ13	sp|Q0ZJ13|ATPB_VITVI	VVDLLAPYRR	10	0	61.78	1200.7	SIFETGIKVVDLLAPY	DLLAPYRRGGKIGLFG	155	164	yes	yes	3	0.004971		K	V	V	R	R	G	1	2	0	1	0	0	0	0	0	0	2	0	0	0	1	0	0	0	1	2	0	1	30550000	0	0	0	10484000	0
Q0ZJ13	sp|Q0ZJ13|ATPB_VITVI	TVLIMELINNIAK	13	20	166.45	1470.85	FGGAGVGKTVLIMELI	ELINNIAKAHGGVSVF	179	191	yes	no	2	3.9513e-44	86	K	T	V	A	K	A	1	0	2	0	0	0	1	0	0	3	2	1	1	0	0	0	1	0	0	1	0	0	107810000	1588800	1230000	0	30007000	17819000
Q0ZJ13	sp|Q0ZJ13|ATPB_VITVI	VVDLLAPYR	9	32	107.57	1044.6	SIFETGIKVVDLLAPY	VDLLAPYRRGGKIGLF	155	163	yes	no	2	0.0005131		K	V	V	Y	R	R	1	1	0	1	0	0	0	0	0	0	2	0	0	0	1	0	0	0	1	2	0	0	101180000	0	3901600	4764500	21471000	24344000
Q0ZJ13	tr|F6HFL0|F6HFL0_VITVI	IGLFGGAGVGK	11	15	74.841	974.555	APYQRGGKIGLFGGAG	FGGAGVGKTVLIMELI	228	238	no	no	2	0.0017285		K	I	G	G	K	T	1	0	0	0	0	0	0	5	0	1	1	1	0	1	0	0	0	0	0	1	0	0	626400000	19614000	18143000	13247000	105540000	92438000
Q0ZJ13	sp|Q0ZJ13|ATPB_VITVI	AVAMSATDGLMR	12	28	116.13	1221.58	LLGNNRVRAVAMSATD	SATDGLMRGMEVIDTG	76	87	yes	no	2	3.1415e-22	82;83	R	A	V	M	R	G	3	1	0	1	0	0	0	1	0	0	1	0	2	0	0	1	1	0	0	1	0	0	379060000	10266000	11342000	4966900	86888000	88773000
Q0ZJ13	sp|Q0ZJ13|ATPB_VITVI	GMEVIDTGAPLSVPVGGATLGR	22	18	122.18	2096.09	SATDGLMRGMEVIDTG	VGGATLGRIFNVLGEP	88	109	yes	no	2	1.204e-42	84	R	G	M	G	R	I	2	1	0	1	0	0	1	5	0	1	2	0	1	0	2	1	2	0	0	3	0	0	214370000	2833900	2574800	2263700	54965000	52705000
Q0ZJ13	sp|Q0ZJ13|ATPB_VITVI	MPNIYNALVVK	11	1	57.203	1260.69	DVAFPPGKMPNIYNAL	IYNALVVKGRDTVGQQ	40	50	yes	no	2	0.0030041	85	K	M	P	V	K	G	1	0	2	0	0	0	0	0	0	1	1	1	1	0	1	0	0	0	1	2	0	0	9555200	0	0	0	3833000	0
Q0ZJ13	sp|Q0ZJ13|ATPB_VITVI	SAPAFIQLDTK	11	4	65.295	1189.63	RTTSPIHRSAPAFIQL	AFIQLDTKLSIFETGI	135	145	yes	no	2	0.0043856		R	S	A	T	K	L	2	0	0	1	0	1	0	0	0	1	1	1	0	1	1	1	1	0	0	0	0	0	112140000	5335000	3339700	2995100	27794000	31715000
Q0ZJ18	sp|Q0ZJ18|RR4_VITVI	LDNILFR	7	1	99.375	889.502	LLQLLEMRLDNILFRL	RLDNILFRLGMASTIP	91	97	yes	yes	2	0.015609		R	L	D	F	R	L	0	1	1	1	0	0	0	0	0	1	2	0	0	1	0	0	0	0	0	0	0	0	87370000	1573000	1031700	0	13581000	13845000
Q0ZJ18	sp|Q0ZJ18|RR4_VITVI	VLLQLLEMR	9	15	120.99	1113.66	KAKGATGRVLLQLLEM	LLQLLEMRLDNILFRL	82	90	yes	yes	2	0.0001859	89	R	V	L	M	R	L	0	1	0	0	0	1	1	0	0	0	4	0	1	0	0	0	0	0	0	1	0	0	61313000	621110	0	0	13473000	6459700
Q0ZJ20	sp|Q0ZJ20|PSAA_VITVI	ALSIVQGR	8	30	135.84	842.497	VAPATQPRALSIVQGR	ALSIVQGRAVGVTHYL	716	723	yes	yes	2	0.0001747		R	A	L	G	R	A	1	1	0	0	0	1	0	1	0	1	1	0	0	0	0	1	0	0	0	1	0	0	2537000000	34593000	33728000	28316000	247170000	299680000
Q0ZJ20	sp|Q0ZJ20|PSAA_VITVI	DILEAHKGPFTGQGHK	16	1	30.072	1733.88	WGIGHGLKDILEAHKG	PFTGQGHKGLYEILTT	321	336	yes	yes	3	0.024969		K	D	I	H	K	G	1	0	0	1	0	1	1	3	2	1	1	2	0	1	1	0	1	0	0	0	0	1	2649200	0	0	0	0	0
Q0ZJ20	sp|Q0ZJ20|PSAA_VITVI	EIPLPHEFILNR	12	88	136.53	1476.81	LNAGVDPKEIPLPHEF	PHEFILNRDLLAQLYP	233	244	yes	yes	2;3	2.7209e-16		K	E	I	N	R	D	0	1	1	0	0	0	2	0	1	2	2	0	0	1	2	0	0	0	0	0	0	0	1531600000	13508000	10274000	7587800	240450000	116000000
Q0ZJ20	sp|Q0ZJ20|PSAA_VITVI	FSNYEAWLSDPTHIGPSAQVVWPIVGQEILNGDVGGGFR	39	4	25.875	4212.07	GMYFHGARFSNYEAWL	GDVGGGFRGIQITSGF	95	133	yes	yes	3;4	0.0024853		R	F	S	F	R	G	2	1	2	2	0	2	2	6	1	3	2	0	0	2	3	3	1	2	1	4	0	0	132080000	0	0	0	26388000	27123000
Q0ZJ20	sp|Q0ZJ20|PSAA_VITVI	GIQITSGFFQMWR	13	39	170.66	1569.78	GDVGGGFRGIQITSGF	SGFFQMWRASGITNEL	134	146	yes	yes	2	1.5013e-53	90	R	G	I	W	R	A	0	1	0	0	0	2	0	2	0	2	0	0	1	2	0	1	1	1	0	0	0	0	715850000	3857700	2928500	2015900	109740000	106790000
Q0ZJ20	sp|Q0ZJ20|PSAA_VITVI	TNWGIGHGLK	10	2	75.416	1081.57	LIAGHMYRTNWGIGHG	WGIGHGLKDILEAHKG	311	320	yes	yes	2	0.0011259		R	T	N	L	K	D	0	0	1	0	0	0	0	3	1	1	1	1	0	0	0	0	1	1	0	0	0	0	218850000	0	0	0	0	0
Q0ZJ20	sp|Q0ZJ20|PSAA_VITVI	TSFEEWAR	8	12	124.98	1024.46	LVDRDPIKTSFEEWAR	TSFEEWARPGHFSRTI	21	28	yes	yes	2	0.0015401		K	T	S	A	R	P	1	1	0	0	0	0	2	0	0	0	0	0	0	1	0	1	1	1	0	0	0	0	141020000	2316700	3489100	2278500	0	19541000
Q0ZJ20	sp|Q0ZJ20|PSAA_VITVI	YAEFLTFR	8	30	152.63	1045.52	FFTLNWSKYAEFLTFR	YAEFLTFRGGLDPVTG	269	276	yes	yes	2	3.1221e-09		K	Y	A	F	R	G	1	1	0	0	0	0	1	0	0	0	1	0	0	2	0	0	1	0	1	0	0	0	968580000	3111900	12430000	6421600	146350000	21891000
Q0ZJ20	sp|Q0ZJ20|PSAA_VITVI	YNDLLDR	7	37	160.78	907.44	RDYDPTTRYNDLLDRV	RYNDLLDRVLRHRDAI	420	426	yes	yes	2	1.129e-16		R	Y	N	D	R	V	0	1	1	2	0	0	0	0	0	0	2	0	0	0	0	0	0	0	1	0	0	0	3389600000	41004000	49215000	35582000	315850000	293970000
Q0ZJ21	sp|Q0ZJ21|PSAB_VITVI	DKPVALSIVQAR	12	30	124.38	1295.76	LANLIRWRDKPVALSI	ALSIVQARLVGLAHFS	695	706	yes	yes	2;3	3.2599e-12		R	D	K	A	R	L	2	1	0	1	0	1	0	0	0	1	1	1	0	0	1	1	0	0	0	2	0	1	610180000	8369400	9456200	9548200	75421000	58383000
Q0ZJ21	sp|Q0ZJ21|PSAB_VITVI	FSQGLAQDPTTR	12	31	219.89	1319.65	________________	LAQDPTTRRIWFGIAT	8	19	yes	yes	2	2.4268e-115		R	F	S	T	R	R	1	1	0	1	0	2	0	1	0	0	1	0	0	1	1	1	2	0	0	0	0	0	2453600000	40688000	41910000	33844000	550710000	316690000
Q0ZJ21	sp|Q0ZJ21|PSAB_VITVI	FSQGLAQDPTTRR	13	20	124.24	1475.75	________________	AQDPTTRRIWFGIATA	8	20	yes	yes	2;3	3.7147e-13		R	F	S	R	R	I	1	2	0	1	0	2	0	1	0	0	1	0	0	1	1	1	2	0	0	0	0	1	223630000	1516600	3941300	3780500	29642000	57343000
Q0ZJ21	sp|Q0ZJ21|PSAB_VITVI	IWFGIATAHDFESHDDITEER	21	35	165.06	2488.13	AQDPTTRRIWFGIATA	HDDITEERLYQNIFAS	21	41	yes	yes	3;4	9.8108e-112		R	I	W	E	R	L	2	1	0	3	0	0	3	1	2	3	0	0	0	2	0	1	2	1	0	0	0	0	388220000	0	0	0	90638000	34822000
Q0ZJ21	sp|Q0ZJ21|PSAB_VITVI	PIAHAIWDPHFGQPAVEAFTR	21	43	158.44	2359.19	VQDPLHVRPIAHAIWD	PAVEAFTRGGAPGPVN	86	106	yes	yes	3;4	4.1841e-96		R	P	I	T	R	G	4	1	0	1	0	1	1	1	2	2	0	0	0	2	3	0	1	1	0	1	0	0	353690000	0	0	0	59122000	5798400
Q0ZJ21	sp|Q0ZJ21|PSAB_VITVI	PSVSWFK	7	5	71.922	849.438	LHLQPKWKPSVSWFKN	KPSVSWFKNAESRLNH	163	169	yes	yes	2	0.042384		K	P	S	F	K	N	0	0	0	0	0	0	0	0	0	0	0	1	0	1	1	2	0	1	0	1	0	0	75511000	0	0	0	14247000	0
Q0ZJ21	sp|Q0ZJ21|PSAB_VITVI	QILIEPIFAQWIQSAHGK	18	29	166.37	2078.13	LAFGTPEKQILIEPIF	WIQSAHGKTSYGFDVL	452	469	yes	yes	3	1.0051e-80		K	Q	I	G	K	T	2	0	0	0	0	3	1	1	1	4	1	1	0	1	1	1	0	1	0	0	0	0	321350000	1789400	2392800	1588000	41521000	23957000
Q0ZJ21	sp|Q0ZJ21|PSAB_VITVI	RIWFGIATAHDFESHDDITEER	22	4	146.25	2644.23	LAQDPTTRRIWFGIAT	HDDITEERLYQNIFAS	20	41	yes	yes	4	7.3862e-81		R	R	I	E	R	L	2	2	0	3	0	0	3	1	2	3	0	0	0	2	0	1	2	1	0	0	0	1	63548000	0	0	0	13610000	5757700
Q0ZJ21	sp|Q0ZJ21|PSAB_VITVI	TNFGIGHSMK	10	10	84.884	1090.52	LVAGHMYRTNFGIGHS	FGIGHSMKDLLEAHIP	293	302	yes	yes	2;3	0.0016557		R	T	N	M	K	D	0	0	1	0	0	0	0	2	1	1	0	1	1	1	0	1	1	0	0	0	0	0	88675000	1693600	2263500	1492700	0	0
Q0ZJ21	sp|Q0ZJ21|PSAB_VITVI	TPLANLIR	8	49	172.15	896.544	TLAWAHERTPLANLIR	TPLANLIRWRDKPVAL	685	692	yes	yes	2	2.0312e-21		R	T	P	I	R	W	1	1	1	0	0	0	0	0	0	1	2	0	0	0	1	0	1	0	0	0	0	0	2160800000	21407000	21941000	15582000	178890000	138810000
Q0ZJ21	sp|Q0ZJ21|PSAB_VITVI	TSYGFDVLLSSTTGPAFNAGR	21	16	117.84	2160.05	WIQSAHGKTSYGFDVL	GPAFNAGRSIWLPGWL	470	490	yes	yes	2	5.8065e-42		K	T	S	G	R	S	2	1	1	1	0	0	0	3	0	0	2	0	0	2	1	3	3	0	1	1	0	0	162540000	3929500	2770100	1603100	26584000	38046000
Q0ZJ21	sp|Q0ZJ21|PSAB_VITVI	WKPSVSWFK	9	2	45.158	1163.61	GWLHLQPKWKPSVSWF	KPSVSWFKNAESRLNH	161	169	yes	yes	3	0.035045		K	W	K	F	K	N	0	0	0	0	0	0	0	0	0	0	0	2	0	1	1	2	0	2	0	1	0	1	21827000	0	0	0	0	0
Q0ZJ21	sp|Q0ZJ21|PSAB_VITVI	DLLEAHIPPGGR	12	115	117.79	1273.68	FGIGHSMKDLLEAHIP	AHIPPGGRLGRGHKGL	303	314	yes	no	2;3	1.741e-15		K	D	L	G	R	L	1	1	0	1	0	0	1	2	1	1	2	0	0	0	2	0	0	0	0	0	0	0	360570000	0	0	2407600	33312000	71261000
Q0ZJ21	sp|Q0ZJ21|PSAB_VITVI	DYNPEQNEDNVLAR	14	48	226.88	1675.74	HGAIFFIRDYNPEQNE	NEDNVLARMLDHKEAI	397	410	yes	no	2	1.5213e-162		R	D	Y	A	R	M	1	1	3	2	0	1	2	0	0	0	1	0	0	0	1	0	0	0	1	1	0	0	1463000000	38397000	19709000	14075000	155630000	107100000
Q0ZJ24	sp|Q0ZJ24|PSBC_VITVI	ALYFGGVYDTWAPGGGDVR	19	13	136.66	1999.94	GAFLLVFKALYFGGVY	APGGGDVRKITNLTLS	179	197	yes	yes	2	2.3235e-56		K	A	L	V	R	K	2	1	0	2	0	0	0	5	0	0	1	0	0	1	1	0	1	1	2	2	0	0	257180000	2970500	3685500	3064300	37986000	42383000
Q0ZJ24	sp|Q0ZJ24|PSBC_VITVI	APWLEPLR	8	39	143.89	980.544	TMRFWDLRAPWLEPLR	APWLEPLRGPNGLDLS	363	370	yes	yes	2	5.6734e-06		R	A	P	L	R	G	1	1	0	0	0	0	1	0	0	0	2	0	0	0	2	0	0	1	0	0	0	0	1830900000	24507000	29358000	22268000	306490000	285000000
Q0ZJ24	sp|Q0ZJ24|PSBC_VITVI	APWLEPLRGPNGLDLSR	17	12	137.61	1890.01	TMRFWDLRAPWLEPLR	PNGLDLSRLKKDIQPW	363	379	yes	yes	3	9.505e-47		R	A	P	S	R	L	1	2	1	1	0	0	1	2	0	0	4	0	0	0	3	1	0	1	0	0	0	1	220210000	0	4086900	2132700	35838000	0
Q0ZJ24	sp|Q0ZJ24|PSBC_VITVI	DFEPVLSMTPLN	12	30	136.53	1361.65	GFEKGIDRDFEPVLSM	VLSMTPLN________	462	473	yes	yes	2	4.128e-23	91	R	D	F	L	N	-	0	0	1	1	0	0	1	0	0	0	2	0	1	1	2	1	1	0	0	1	0	0	387890000	10695000	8848900	5939400	82029000	74063000
Q0ZJ24	sp|Q0ZJ24|PSBC_VITVI	DIQPWQER	8	20	100.02	1070.51	LDLSRLKKDIQPWQER	DIQPWQERRSAEYMTH	383	390	yes	yes	2	0.0030547		K	D	I	E	R	R	0	1	0	1	0	2	1	0	0	1	0	0	0	0	1	0	0	1	0	0	0	0	864900000	8115400	19295000	6271300	130890000	91939000
Q0ZJ24	sp|Q0ZJ24|PSBC_VITVI	DQETTGFAWWAGNAR	15	75	305.75	1708.76	GTLALAGRDQETTGFA	AWWAGNARLINLSGKL	27	41	yes	yes	2;3	0		R	D	Q	A	R	L	3	1	1	1	0	1	1	2	0	0	0	0	0	1	0	0	2	2	0	0	0	0	2643600000	21103000	32660000	25655000	449180000	329740000
Q0ZJ24	sp|Q0ZJ24|PSBC_VITVI	GIDRDFEPVLSMTPLN	16	54	170.35	1802.89	AAAAGFEKGIDRDFEP	VLSMTPLN________	458	473	yes	yes	2;3	1.2513e-77	91	K	G	I	L	N	-	0	1	1	2	0	0	1	1	0	1	2	0	1	1	2	1	1	0	0	1	0	1	1229800000	20035000	29708000	22975000	368040000	155830000
Q0ZJ24	sp|Q0ZJ24|PSBC_VITVI	ITNLTLSPSVIFGYLLK	17	59	159.34	1878.09	PGGGDVRKITNLTLSP	VIFGYLLKSPFGGEGW	199	215	yes	yes	2;3	1.1625e-69		K	I	T	L	K	S	0	0	1	0	0	0	0	1	0	2	4	1	0	1	1	2	2	0	1	1	0	0	991330000	5069800	5079900	2494100	66599000	64636000
Q0ZJ24	sp|Q0ZJ24|PSBC_VITVI	KITNLTLSPSVIFGYLLK	18	1	68.41	2006.18	APGGGDVRKITNLTLS	VIFGYLLKSPFGGEGW	198	215	yes	yes	3	7.5682e-06		R	K	I	L	K	S	0	0	1	0	0	0	0	1	0	2	4	2	0	1	1	2	2	0	1	1	0	1	21526000	0	0	0	0	0
Q0ZJ24	sp|Q0ZJ24|PSBC_VITVI	LGANVGSAQGPTGLGK	16	37	284.53	1425.76	TFLVRDQRLGANVGSA	QGPTGLGKYLMRSPTG	324	339	yes	yes	2	0		R	L	G	G	K	Y	2	0	1	0	0	1	0	5	0	0	2	1	0	0	1	1	1	0	0	1	0	0	2136200000	29813000	34162000	31009000	284170000	237190000
Q0ZJ24	sp|Q0ZJ24|PSBC_VITVI	LINLSGK	7	14	107.67	743.454	AWWAGNARLINLSGKL	RLINLSGKLLGAHVAH	42	48	yes	yes	2	0.015173		R	L	I	G	K	L	0	0	1	0	0	0	0	1	0	1	2	1	0	0	0	1	0	0	0	0	0	0	475280000	23516000	28395000	18898000	588440	71653000
Q0ZJ24	sp|Q0ZJ24|PSBC_VITVI	SAEYMTHAPLGSLNSVGGVATEINAVNYVSPR	32	22	199.81	3303.62	IQPWQERRSAEYMTHA	AVNYVSPRSWLATSHF	392	423	yes	yes	3	2.3146e-270	92	R	S	A	P	R	S	4	1	3	0	0	0	2	3	1	1	2	0	1	0	2	4	2	0	2	4	0	0	980050000	4990800	18888000	0	274660000	189720000
Q0ZJ24	sp|Q0ZJ24|PSBC_VITVI	SPTGEVIFGGETMR	14	98	241.76	1479.7	GLGKYLMRSPTGEVIF	IFGGETMRFWDLRAPW	344	357	yes	yes	2;3	6.743e-210	93	R	S	P	M	R	F	0	1	0	0	0	0	2	3	0	1	0	0	1	1	1	1	2	0	0	1	0	0	4594600000	66016000	59831000	54313000	696350000	673070000
Q0ZJ24	sp|Q0ZJ24|PSBC_VITVI	SPTGEVIFGGETMRFWDLR	19	4	82.877	2197.06	GLGKYLMRSPTGEVIF	TMRFWDLRAPWLEPLR	344	362	yes	yes	3	9.9467e-11	93	R	S	P	L	R	A	0	2	0	1	0	0	2	3	0	1	1	0	1	2	1	1	2	1	0	1	0	1	58865000	0	0	0	7489700	4337400
Q0ZJ24	sp|Q0ZJ24|PSBC_VITVI	GPNGLDLSR	9	13	86.898	927.477	APWLEPLRGPNGLDLS	PNGLDLSRLKKDIQPW	371	379	yes	no	2	0.0037676		R	G	P	S	R	L	0	1	1	1	0	0	0	2	0	0	2	0	0	0	1	1	0	0	0	0	0	0	485920000	7012400	6983700	4590800	70923000	67339000
Q0ZJ25	sp|Q0ZJ25|PSBD_VITVI	AAEDPEFETFYTK	13	9	161.21	1546.68	DFVSQEIRAAEDPEFE	EFETFYTKNILLNEGI	306	318	yes	yes	2	1.0306e-43		R	A	A	T	K	N	2	0	0	1	0	0	3	0	0	0	0	1	0	2	1	0	2	0	1	0	0	0	629080000	20475000	26688000	15578000	162590000	142180000
Q0ZJ25	sp|Q0ZJ25|PSBD_VITVI	AFNPTQAEETYSMVTANR	18	101	221.47	2028.92	GDGANTFRAFNPTQAE	YSMVTANRFWSQIFGV	235	252	yes	yes	2;3	1.3754e-177	94	R	A	F	N	R	F	3	1	2	0	0	1	2	0	0	0	0	0	1	1	1	1	3	0	1	1	0	0	995700000	5864500	27327000	15115000	201670000	122090000
Q0ZJ25	sp|Q0ZJ25|PSBD_VITVI	AWMAAQDQPHENLIFPEEVLPR	22	26	196.89	2590.26	ILLNEGIRAWMAAQDQ	FPEEVLPRGNAL____	328	349	yes	yes	3	1.8633e-176	95	R	A	W	P	R	G	3	1	1	1	0	2	3	0	1	1	2	0	1	1	3	0	0	1	0	1	0	0	337000000	12476000	13880000	11929000	109760000	53751000
Q0ZJ25	sp|Q0ZJ25|PSBD_VITVI	AYDFVSQEIR	10	44	169.37	1226.59	VGLALNLRAYDFVSQE	DFVSQEIRAAEDPEFE	296	305	yes	yes	2	8.2211e-27		R	A	Y	I	R	A	1	1	0	1	0	1	1	0	0	1	0	0	0	1	0	1	0	0	1	1	0	0	3542800000	91710000	72427000	53777000	690910000	820630000
Q0ZJ25	sp|Q0ZJ25|PSBD_VITVI	DESDLFDIMDDWLR	14	34	151.74	1768.76	IALGKFTKDESDLFDI	DIMDDWLRRDRFVFVG	11	24	yes	yes	2	2.7221e-38	96	K	D	E	L	R	R	0	1	0	5	0	0	1	0	0	1	2	0	1	1	0	1	0	1	0	0	0	0	828180000	13187000	3257200	6104500	147370000	99396000
Q0ZJ25	sp|Q0ZJ25|PSBD_VITVI	FTKDESDLFDIMDDWLR	17	9	140.8	2144.97	________________	DIMDDWLRRDRFVFVG	8	24	yes	yes	3	4.3276e-47	96	K	F	T	L	R	R	0	1	0	5	0	0	1	0	0	1	2	1	1	2	0	1	1	1	0	0	0	1	53633000	1019700	0	0	16918000	8294300
Q0ZJ25	sp|Q0ZJ25|PSBD_VITVI	NILLNEGIR	9	13	125.82	1040.6	EFETFYTKNILLNEGI	ILLNEGIRAWMAAQDQ	319	327	yes	yes	2	0.00010473		K	N	I	I	R	A	0	1	2	0	0	0	1	1	0	2	2	0	0	0	0	0	0	0	0	0	0	0	443090000	17735000	17915000	18229000	130310000	55505000
Q0ZJ25	sp|Q0ZJ25|PSBD_VITVI	FWSQIFGVAFSNK	13	37	170.79	1529.77	YSMVTANRFWSQIFGV	FGVAFSNKRWLHFFML	253	265	yes	no	2;3	5.6007e-53		R	F	W	N	K	R	1	0	1	0	0	1	0	1	0	1	0	1	0	3	0	2	0	1	0	1	0	0	223710000	1098100	1429200	0	30675000	33839000
Q0ZJ34	sp|Q0ZJ34|ATPF_VITVI	EGAIEQLEK	9	5	113.1	1015.52	IRNSEELREGAIEQLE	GAIEQLEKARARLRKV	72	80	yes	yes	2	4.2441e-09		R	E	G	E	K	A	1	0	0	0	0	1	3	1	0	1	1	1	0	0	0	0	0	0	0	0	0	0	157660000	0	2703900	3084600	22902000	23059000
Q0ZJ34	sp|Q0ZJ34|ATPF_VITVI	GVLSDLLDNR	10	9	103.31	1100.58	GVLIFFGKGVLSDLLD	LSDLLDNRKQRILNTI	47	56	yes	yes	2	0.00014068		K	G	V	N	R	K	0	1	1	2	0	0	0	1	0	0	3	0	0	0	0	1	0	0	0	1	0	0	46417000	0	0	0	14047000	3281900
Q0ZJ40	sp|Q0ZJ40|PSBA_VITVI	ANLGMEVMHER	11	66	125.03	1285.59	TWADIINRANLGMEVM	GMEVMHERNAHNFPLD	324	334	yes	no	2;3	4.4093e-11	99;100	R	A	N	E	R	N	1	1	1	0	0	0	2	1	1	0	1	0	2	0	0	0	0	0	0	1	0	0	1043100000	15242000	14693000	12536000	223950000	200820000
Q0ZJ40	sp|Q0ZJ40|PSBA_VITVI	ESESLWGR	8	5	98.458	962.446	MTVILERRESESLWGR	ESESLWGRFCNWITST	9	16	yes	no	2	0.0030216		R	E	S	G	R	F	0	1	0	0	0	0	2	1	0	0	1	0	0	0	0	2	0	1	0	0	0	0	1182200000	19582000	31472000	19255000	168650000	120740000
Q0ZJ40	sp|Q0ZJ40|PSBA_VITVI	EWELSFR	7	42	173.59	965.461	GVACYMGREWELSFRL	REWELSFRLGMRPWIA	130	136	yes	no	2	4.6028e-25		R	E	W	F	R	L	0	1	0	0	0	0	2	0	0	0	1	0	0	1	0	1	0	1	0	0	0	0	1481900000	9811600	24652000	17206000	198610000	173510000
Q0ZJ40	sp|Q0ZJ40|PSBA_VITVI	FGQEEETYNIVAAHGYFGR	19	61	274.6	2187	ESANAGYRFGQEEETY	AAHGYFGRLIFQYASF	239	257	yes	no	2;3	0		R	F	G	G	R	L	2	1	1	0	0	1	3	3	1	1	0	0	0	2	0	0	1	0	2	1	0	0	2492600000	47563000	54050000	33840000	567080000	320440000
Q0ZJ40	sp|Q0ZJ40|PSBA_VITVI	LIFQYASFNNSR	12	59	196.24	1458.73	AAHGYFGRLIFQYASF	YASFNNSRSLHFFLAA	258	269	yes	no	2;3	1.5715e-80		R	L	I	S	R	S	1	1	2	0	0	1	0	0	0	1	1	0	0	2	0	2	0	0	1	0	0	0	3102500000	18750000	35746000	17869000	453570000	203250000
Q0ZJ40	sp|Q0ZJ40|PSBA_VITVI	VINTWADIINR	11	66	212.82	1313.71	SVVDSQGRVINTWADI	TWADIINRANLGMEVM	313	323	yes	no	2;3	8.8415e-97		R	V	I	N	R	A	1	1	2	1	0	0	0	0	0	3	0	0	0	0	0	0	1	1	0	1	0	0	7956100000	44263000	81996000	78818000	1548500000	1048000000
Q0ZJ40	sp|Q0ZJ40|PSBA_VITVI	ETTENESANAGYR	13	3	77.185	1440.61	LVTSSLIRETTENESA	ESANAGYRFGQEEETY	226	238	yes	no	2	0.00079413		R	E	T	Y	R	F	2	1	2	0	0	0	3	1	0	0	0	0	0	0	0	1	2	0	1	0	0	0	7733100	0	0	0	1155300	2136700
Q1PSI9	sp|Q1PSI9|IDND_VITVI	ANVGPETNVLIMGSGPIGLVTMLAAR	26	18	135.62	2580.38	VGIHACRRANVGPETN	LVTMLAARAFGAPRIV	179	204	yes	yes	2;3	6.6967e-89	101	R	A	N	A	R	A	3	1	2	0	0	0	1	4	0	2	3	0	2	0	2	1	2	0	0	3	0	0	79009000	4636800	2082800	799310	25538000	17795000
Q1PSI9	sp|Q1PSI9|IDND_VITVI	DLGADDIIR	9	9	79.148	986.503	DQRLAIAKDLGADDII	LGADDIIRVSTNIQDL	226	234	yes	yes	2	0.0050778		K	D	L	I	R	V	1	1	0	3	0	0	0	1	0	2	1	0	0	0	0	0	0	0	0	0	0	0	97997000	10042000	9605200	7765700	25165000	8356300
Q1PSI9	sp|Q1PSI9|IDND_VITVI	DVEEAFETSAR	11	8	125.72	1252.56	HRFTFSQKDVEEAFET	EAFETSARGGNAIKVM	345	355	yes	yes	2	1.5283e-11		K	D	V	A	R	G	2	1	0	1	0	0	3	0	0	0	0	0	0	1	0	1	1	0	0	1	0	0	197380000	22558000	19620000	14363000	40903000	31956000
Q1PSI9	sp|Q1PSI9|IDND_VITVI	EVDIVGIFR	9	30	154.49	1046.58	PLTPAAAREVDIVGIF	VDIVGIFRYRNTWPLC	304	312	yes	yes	2	2.0857e-13		R	E	V	F	R	Y	0	1	0	1	0	0	1	1	0	2	0	0	0	1	0	0	0	0	0	2	0	0	463900000	3001200	41036000	34055000	122220000	0
Q1PSI9	sp|Q1PSI9|IDND_VITVI	IQPYILPSLGPYDVK	15	3	51.771	1701.93	LLGIKTLKIQPYILPS	SLGPYDVKVRIKAVGI	33	47	yes	yes	2	0.0038209		K	I	Q	V	K	V	0	0	0	1	0	1	0	1	0	2	2	1	0	0	3	1	0	0	2	1	0	0	33511000	4035600	2285100	2604800	6768200	10689000
Q1PSI9	sp|Q1PSI9|IDND_VITVI	IVLVDVDDQR	10	24	142	1170.62	ARAFGAPRIVLVDVDD	LVDVDDQRLAIAKDLG	211	220	yes	yes	2	7.0574e-11		R	I	V	Q	R	L	0	1	0	3	0	1	0	0	0	1	1	0	0	0	0	0	0	0	0	3	0	0	670190000	52289000	56944000	50803000	143690000	118840000
Q1PSI9	sp|Q1PSI9|IDND_VITVI	TMSTALNATR	10	1	47.971	1064.53	FDCVGFNKTMSTALNA	STALNATRAGGKVCLV	269	278	yes	yes	2	0.041664		K	T	M	T	R	A	2	1	1	0	0	0	0	0	0	0	1	0	1	0	0	1	3	0	0	0	0	0	35215000	7271400	20738000	2728800	0	0
Q1PSI9	sp|Q1PSI9|IDND_VITVI	VSTNIQDLDEEVAK	14	10	141.59	1559.77	LGADDIIRVSTNIQDL	DLDEEVAKIQSTMVTG	235	248	yes	yes	2	4.8041e-31		R	V	S	A	K	I	1	0	1	2	0	1	2	0	0	1	1	1	0	0	0	1	1	0	0	2	0	0	137860000	12795000	9411400	7203900	33716000	25505000
Q1PSI9	sp|Q1PSI9|IDND_VITVI	IDVKPLITHR	10	24	124.67	1190.71	LEFLRSGKIDVKPLIT	VKPLITHRFTFSQKDV	329	338	no	no	2;3	1.4338e-07		K	I	D	H	R	F	0	1	0	1	0	0	0	0	1	2	1	1	0	0	1	0	1	0	0	1	0	1	583460000	24400000	24830000	17929000	124810000	95939000
A2ICC9	tr|A2ICC9|A2ICC9_VITVI	IILKPLPETVSETEPPLFPPR	21	2	55.453	2372.34	FCEPPKEKIILKPLPE	EPPLFPPRTFSQHIQH	314	334	yes	yes	3	1.0609e-05		K	I	I	P	R	T	0	1	0	0	0	0	3	0	0	2	3	1	0	1	6	1	2	0	0	1	0	1	3611400	0	0	0	0	0
A3FA63	tr|A3FA63|A3FA63_VITVI	YNSLGGGANVVNAGYTK	17	2	56.424	1683.82	VKGFEKGRYNSLGGGA	VVNAGYTKGDGLGAEI	159	175	yes	yes	2	0.00048273		R	Y	N	T	K	G	2	0	3	0	0	0	0	4	0	0	1	1	0	0	0	1	1	0	2	2	0	0	6485500	0	0	0	0	0
A3FA66	tr|A3FA66|A3FA66_VITVI	EPPPAPLFEPGELHSWSFWR	20	45	188.04	2378.15	AQTDKDYREPPPAPLF	LHSWSFWRAGIAEFMA	33	52	yes	yes	2;3	7.1725e-140		R	E	P	W	R	A	1	1	0	0	0	0	3	1	1	0	2	0	0	2	5	2	0	2	0	0	0	0	645680000	4021200	4793100	2280100	88291000	72389000
A3FA66	tr|A3FA66|A3FA66_VITVI	GFQGHQYEVLGGGANVVAAGYSK	23	35	120.63	2308.12	ICGAGVVKGFQGHQYE	VVAAGYSKGDGLGAEI	152	174	yes	yes	2;3	6.8723e-52		K	G	F	S	K	G	3	0	1	0	0	2	1	6	1	0	1	1	0	1	0	1	0	0	2	3	0	0	404870000	3102100	5256600	10252000	52030000	44089000
A3FA66	tr|A3FA66|A3FA66_VITVI	SLGAAIIYNR	10	32	153.05	1076.6	GTGINPARSLGAAIIY	GAAIIYNREHAWDDMW	239	248	yes	no	2	3.2299e-19		R	S	L	N	R	E	2	1	1	0	0	0	0	1	0	2	1	0	0	0	0	1	0	0	1	0	0	0	1145300000	11603000	16407000	10391000	110470000	73895000
A3FA68	tr|A3FA68|A3FA68_VITVI	DYHDPPPAPLVDPEELGSWSFYR	23	13	123.12	2686.23	GHGDLTLKDYHDPPPA	LGSWSFYRAIIAEFVA	17	39	yes	yes	3	3.6551e-52		K	D	Y	Y	R	A	1	1	0	3	0	0	2	1	1	0	2	0	0	1	5	2	0	1	2	1	0	0	59035000	0	0	0	0	0
A3FA68	tr|A3FA68|A3FA68_VITVI	LFQDIYYIR	9	16	151.44	1229.64	ICGCGLVKLFQDIYYI	FQDIYYIRYGGGANEL	145	153	yes	yes	2	1.6547e-10		K	L	F	I	R	Y	0	1	0	1	0	1	0	0	0	2	1	0	0	1	0	0	0	0	2	0	0	0	256310000	0	0	0	0	0
A3FA68	tr|A3FA68|A3FA68_VITVI	SLGAAVIYNQPK	12	14	180.97	1259.69	GTGINPARSLGAAVIY	AVIYNQPKAWSDHWVF	232	243	yes	yes	2	6.5393e-54		R	S	L	P	K	A	2	0	1	0	0	1	0	1	0	1	1	1	0	0	1	1	0	0	1	1	0	0	480390000	0	920400	0	0	0
A5ACP0	tr|A5ACP0|A5ACP0_VITVI	AAANAPITMK	10	8	79.659	986.522	________________	ANAPITMKEVLTLPSL	2	11	yes	yes	2	0.00058357	102	M	A	A	M	K	E	4	0	1	0	0	0	0	0	0	1	0	1	1	0	1	0	1	0	0	0	0	0	85772000	2965600	2567700	0	13055000	20572000
A5ACP0	tr|A5ACP0|A5ACP0_VITVI	AAEDANVYHDLVR	13	23	198.85	1471.71	TQFLDVIRAAEDANVY	NVYHDLVRYLLMVRQK	1157	1169	yes	yes	2;3	6.6469e-92		R	A	A	V	R	Y	3	1	1	2	0	0	1	0	1	0	1	0	0	0	0	0	0	0	1	2	0	0	1621500000	23304000	30698000	17545000	226170000	172650000
A5ACP0	tr|A5ACP0|A5ACP0_VITVI	AQLREGLVSDAIESFIR	17	2	80.585	1903.02	AVWSQVAKAQLREGLV	DAIESFIRADDATQFL	1128	1144	yes	yes	3	1.0552e-06		K	A	Q	I	R	A	2	2	0	1	0	1	2	1	0	2	2	0	0	1	0	2	0	0	0	1	0	1	21407000	0	0	0	3157500	0
A5ACP0	tr|A5ACP0|A5ACP0_VITVI	DKLEALNEVK	10	1	101.72	1157.63	GKVDELVKDKLEALNE	LEALNEVKAKEKEEKD	1630	1639	yes	yes	2	0.0019605		K	D	K	V	K	A	1	0	1	1	0	0	2	0	0	0	2	2	0	0	0	0	0	0	0	1	0	1	47012000	0	0	0	14695000	15306000
A5ACP0	tr|A5ACP0|A5ACP0_VITVI	EATAFLLDVLKPNLPEHGFLQTK	23	9	86.791	2580.4	FLQRNLIREATAFLLD	EHGFLQTKVLEINLVT	575	597	yes	yes	3;4	1.5552e-23		R	E	A	T	K	V	2	0	1	1	0	1	2	1	1	0	5	2	0	2	2	0	2	0	0	1	0	1	163040000	0	0	0	57033000	34610000
A5ACP0	tr|A5ACP0|A5ACP0_VITVI	ELAEELLVYFIEK	13	12	133.16	1594.85	TASQSGDRELAEELLV	LLVYFIEKGKKECFAS	1562	1574	yes	yes	2;3	2.8753e-19		R	E	L	E	K	G	1	0	0	0	0	0	4	0	0	1	3	1	0	1	0	0	0	0	1	1	0	0	46981000	0	0	0	11409000	7484800
A5ACP0	tr|A5ACP0|A5ACP0_VITVI	GNLQIIVQTAK	11	12	134.2	1183.69	DLLLVNLRGNLQIIVQ	QIIVQTAKEYSEQLGV	691	701	yes	yes	2	1.5008e-32		R	G	N	A	K	E	1	0	1	0	0	2	0	1	0	2	1	1	0	0	0	0	1	0	0	1	0	0	240720000	0	0	0	34310000	0
A5ACP0	tr|A5ACP0|A5ACP0_VITVI	GNMQLFSVEQHR	12	6	131.69	1444.69	PERPQLVKGNMQLFSV	LFSVEQHRSQALEAHA	189	200	no	no	2	1.5671e-13		K	G	N	H	R	S	0	1	1	0	0	2	1	1	1	0	1	0	1	1	0	1	0	0	0	1	0	0	23614000	0	0	0	0	4387100
A5ACP0	tr|A5ACP0|A5ACP0_VITVI	ISPDPIFLTAEATSIGGFYAINR	23	47	105.38	2452.26	ASAVYRNRISPDPIFL	GGFYAINRRGQVLLAT	311	333	yes	yes	2;3	1.3535e-34		R	I	S	N	R	R	3	1	1	1	0	0	1	2	0	4	1	0	0	2	2	2	2	0	1	0	0	0	340530000	7484400	5238000	3931200	61472000	46514000
A5ACP0	tr|A5ACP0|A5ACP0_VITVI	ISPDPIFLTAEATSIGGFYAINRR	24	0	20.482	2608.36	ASAVYRNRISPDPIFL	GFYAINRRGQVLLATV	311	334	yes	yes	3	0.041733		R	I	S	R	R	G	3	2	1	1	0	0	1	2	0	4	1	0	0	2	2	2	2	0	1	0	0	1	5009800	0	0	0	0	0
A5ACP0	tr|A5ACP0|A5ACP0_VITVI	LGEIEEFILMPNVANLQNVGDR	22	63	141.78	2470.25	YAYAKIDRLGEIEEFI	NLQNVGDRLYDEALYE	1197	1218	yes	yes	2;3	1.0069e-67	107	R	L	G	D	R	L	1	1	3	1	0	1	3	2	0	2	3	0	1	1	1	0	0	0	0	2	0	0	895330000	9422700	11011000	3837200	111750000	65404000
A5ACP0	tr|A5ACP0|A5ACP0_VITVI	LGLLFVYDLESASAVYR	17	1	33.872	1915.01	GLIYVITKLGLLFVYD	ESASAVYRNRISPDPI	292	308	yes	yes	2	0.025323		K	L	G	Y	R	N	2	1	0	1	0	0	1	1	0	0	4	0	0	1	0	2	0	0	2	2	0	0	4089300	0	0	0	0	0
A5ACP0	tr|A5ACP0|A5ACP0_VITVI	LHVIELGSNPGKPGFTK	17	2	132.51	1792.98	NAGQIVSKLHVIELGS	PGKPGFTKKQADLFFP	242	258	yes	yes	2;3	1.8173e-37		K	L	H	T	K	K	0	0	1	0	0	0	1	3	1	1	2	2	0	1	2	1	1	0	0	1	0	1	112390000	0	0	0	12231000	7436900
A5ACP0	tr|A5ACP0|A5ACP0_VITVI	MLGLVTQTSVYHWSIEGDSEPVK	23	0	40.137	2575.26	FWKWITPKMLGLVTQT	EGDSEPVKMFERTANL	124	146	yes	yes	3	0.00071634		K	M	L	V	K	M	0	0	0	1	0	1	2	2	1	1	2	1	1	0	1	3	2	1	1	3	0	0	29383000	0	0	0	0	8776800
A5ACP0	tr|A5ACP0|A5ACP0_VITVI	RPITADSALMNPNTR	15	20	100.11	1655.84	NMPMQPLRRPITADSA	ALMNPNTRILALKAQL	64	78	yes	yes	2;3	5.1879e-11	108	R	R	P	T	R	I	2	2	2	1	0	0	0	0	0	1	1	0	1	0	2	1	2	0	0	0	0	1	493870000	3067200	2859800	6550100	36096000	65903000
A5ACP0	tr|A5ACP0|A5ACP0_VITVI	SFNAGQIVSK	10	0	53.237	1049.55	TLIGFATKSFNAGQIV	NAGQIVSKLHVIELGS	232	241	yes	yes	2	0.057256		K	S	F	S	K	L	1	0	1	0	0	1	0	1	0	1	0	1	0	1	0	2	0	0	0	1	0	0	178290000	13061000	18451000	11060000	15051000	0
A5ACP0	tr|A5ACP0|A5ACP0_VITVI	SQALEAHAASFATFK	15	4	131.84	1577.78	LFSVEQHRSQALEAHA	AASFATFKVPGNDQPC	201	215	yes	yes	2;3	2.5339e-29		R	S	Q	F	K	V	5	0	0	0	0	1	1	0	1	0	1	1	0	2	0	2	1	0	0	0	0	0	48466000	2498700	0	1685200	14420000	8019000
A5ACP0	tr|A5ACP0|A5ACP0_VITVI	TVDTDLALK	9	5	54.539	974.528	EELGDLVKTVDTDLAL	VDTDLALKIYIKARAT	482	490	yes	yes	2	0.025409		K	T	V	L	K	I	1	0	0	2	0	0	0	0	0	0	2	1	0	0	0	0	2	0	0	1	0	0	80733000	1790000	1529000	1473400	10442000	9433400
A5ACP0	tr|A5ACP0|A5ACP0_VITVI	VLDPDNDYRR	10	0	24.089	1261.61	MDSDLWEKVLDPDNDY	DPDNDYRRQLIDQVVS	973	982	yes	yes	3	0.07562		K	V	L	R	R	Q	0	2	1	3	0	0	0	0	0	0	1	0	0	0	1	0	0	0	1	1	0	1	2112100	1571700	540410	0	0	0
A5ACP0	tr|A5ACP0|A5ACP0_VITVI	ADDATQFLDVIR	12	54	211.26	1362.68	DAIESFIRADDATQFL	TQFLDVIRAAEDANVY	1145	1156	no	no	2	2.5247e-97		R	A	D	I	R	A	2	1	0	3	0	1	0	0	0	1	1	0	0	1	0	0	1	0	0	1	0	0	2399000000	28539000	38763000	37605000	393400000	145370000
A5ACP0	tr|A5ACP0|A5ACP0_VITVI	AFMTADLPHELIELLEK	17	14	199.08	1969.02	EQVSAAVKAFMTADLP	ELIELLEKIVLQNSAF	1008	1024	no	no	2;3	3.7743e-137		K	A	F	E	K	I	2	0	0	1	0	0	3	0	1	1	4	1	1	1	1	0	1	0	0	0	0	0	85856000	0	0	0	33515000	10826000
A5ACP0	tr|A5ACP0|A5ACP0_VITVI	AHMGIFTELGVLYAR	15	55	168.31	1676.87	ESGLGLERAHMGIFTE	ELGVLYARYRPEKLME	1326	1340	no	no	2;3	8.0817e-67	103	R	A	H	A	R	Y	2	1	0	0	0	0	1	2	1	1	2	0	1	1	0	0	1	0	1	1	0	0	257040000	0	1763000	1236300	37197000	8961300
A5ACP0	tr|A5ACP0|A5ACP0_VITVI	ALQHYTELPDIK	12	12	94.547	1426.75	EKAGLYVRALQHYTEL	YTELPDIKRVIVNTHA	640	651	no	no	2;3	1.5764e-05		R	A	L	I	K	R	1	0	0	1	0	1	1	0	1	1	2	1	0	0	1	0	1	0	1	0	0	0	410490000	3261800	2457000	2641300	51161000	36010000
A5ACP0	tr|A5ACP0|A5ACP0_VITVI	ALQHYTELPDIKR	13	19	143.94	1582.85	EKAGLYVRALQHYTEL	TELPDIKRVIVNTHAI	640	652	no	no	2;3;4	1.3133e-28		R	A	L	K	R	V	1	1	0	1	0	1	1	0	1	1	2	1	0	0	1	0	1	0	1	0	0	1	465800000	1839000	0	2124500	72380000	50665000
A5ACP0	tr|A5ACP0|A5ACP0_VITVI	AQLPGTTQDHLQIFNIEMK	19	3	72.585	2183.1	NTRILALKAQLPGTTQ	QIFNIEMKAKMKSYQM	84	102	no	no	3	1.3141e-07	104	K	A	Q	M	K	A	1	0	1	1	0	3	1	1	1	2	2	1	1	1	1	0	2	0	0	0	0	0	133830000	0	5490800	0	11343000	6212600
A5ACP0	tr|A5ACP0|A5ACP0_VITVI	AVEFAFR	7	32	137.83	838.434	DNIQSIERAVEFAFRV	RAVEFAFRVEEDAVWS	1109	1115	no	no	1;2	0.012352		R	A	V	F	R	V	2	1	0	0	0	0	1	0	0	0	0	0	0	2	0	0	0	0	0	1	0	0	1330300000	20721000	23908000	18483000	210900000	86722000
A5ACP0	tr|A5ACP0|A5ACP0_VITVI	DLLLVNLR	8	17	111.01	954.586	EWALECMKDLLLVNLR	DLLLVNLRGNLQIIVQ	683	690	no	no	2	0.0007689		K	D	L	L	R	G	0	1	1	1	0	0	0	0	0	0	4	0	0	0	0	0	0	0	0	1	0	0	87430000	0	741790	0	5677800	3807800
A5ACP0	tr|A5ACP0|A5ACP0_VITVI	DPTLAVVAYR	10	7	116.52	1103.6	VGKYCEKRDPTLAVVA	TLAVVAYRRGQCDEEL	927	936	no	no	2	6.5005e-11		R	D	P	Y	R	R	2	1	0	1	0	0	0	0	0	0	1	0	0	0	1	0	1	0	1	2	0	0	56825000	0	1055200	0	21983000	0
A5ACP0	tr|A5ACP0|A5ACP0_VITVI	EGLVSDAIESFIR	13	27	194.06	1434.74	QVAKAQLREGLVSDAI	DAIESFIRADDATQFL	1132	1144	no	no	2;3	1.5848e-77		R	E	G	I	R	A	1	1	0	1	0	0	2	1	0	2	1	0	0	1	0	2	0	0	0	1	0	0	1483700000	22462000	19469000	15047000	369940000	258550000
A5ACP0	tr|A5ACP0|A5ACP0_VITVI	ESIDMHDNFDQIGLAQK	17	18	204.13	1959.9	EEDYDRLRESIDMHDN	DQIGLAQKIEKHELLE	1496	1512	no	no	2;3	3.8702e-138	105	R	E	S	Q	K	I	1	0	1	3	0	2	1	1	1	2	1	1	1	1	0	1	0	0	0	0	0	0	187200000	3743300	4658000	2141900	45656000	29823000
A5ACP0	tr|A5ACP0|A5ACP0_VITVI	FGFVPDLTHYLYTNNMLR	18	6	81.157	2200.08	PLINVCDRFGFVPDLT	LYTNNMLRYIEGYVQK	795	812	no	no	3	1.0014e-07	106	R	F	G	L	R	Y	0	1	2	1	0	0	0	1	1	0	3	0	1	2	1	0	2	0	2	1	0	0	79569000	0	0	0	22372000	5805100
A5ACP0	tr|A5ACP0|A5ACP0_VITVI	FNLNVQAVNVLLDNIQSIER	20	46	243.95	2298.23	EAFAIFKKFNLNVQAV	DNIQSIERAVEFAFRV	1089	1108	no	no	2;3	4.3301e-269		K	F	N	E	R	A	1	1	4	1	0	2	1	0	0	2	3	0	0	1	0	1	0	0	0	3	0	0	1226500000	14814000	15087000	5882400	101390000	57403000
A5ACP0	tr|A5ACP0|A5ACP0_VITVI	FQELFAQTK	9	16	127.76	1110.57	AENLVVQRFQELFAQT	QELFAQTKYKEAAELA	381	389	no	no	2	8.147e-05		R	F	Q	T	K	Y	1	0	0	0	0	2	1	0	0	0	1	1	0	2	0	0	1	0	0	0	0	0	168450000	8915100	9257800	7902400	40297000	31231000
A5ACP0	tr|A5ACP0|A5ACP0_VITVI	GLILSVR	7	12	108.98	756.486	ECPEDFIKGLILSVRS	KGLILSVRSLLPVEPL	845	851	no	no	2	0.0070647		K	G	L	V	R	S	0	1	0	0	0	0	0	1	0	1	2	0	0	0	0	1	0	0	0	1	0	0	76220000	0	0	0	23906000	9734500
A5ACP0	tr|A5ACP0|A5ACP0_VITVI	GNLPGAENLVVQR	13	19	117.7	1365.74	LAVNLAKRGNLPGAEN	AENLVVQRFQELFAQT	368	380	no	no	2	7.1629e-13		R	G	N	Q	R	F	1	1	2	0	0	1	1	2	0	0	2	0	0	0	1	0	0	0	0	2	0	0	339000000	13333000	18751000	13949000	73075000	34334000
A5ACP0	tr|A5ACP0|A5ACP0_VITVI	HELLEMR	7	12	126.04	926.464	GLAQKIEKHELLEMRR	KHELLEMRRVAAYIYK	1516	1522	no	no	2	0.011148		K	H	E	M	R	R	0	1	0	0	0	0	2	0	1	0	2	0	1	0	0	0	0	0	0	0	0	0	218750000	0	0	0	28181000	27112000
A5ACP0	tr|A5ACP0|A5ACP0_VITVI	IIFAFISNWAK	11	15	121.61	1308.72	EALYEAAKIIFAFISN	AFISNWAKLACTLVKL	1230	1240	no	no	2	1.8755e-10		K	I	I	A	K	L	2	0	1	0	0	0	0	0	0	3	0	1	0	2	0	1	0	1	0	0	0	0	41800000	0	0	0	0	3150400
A5ACP0	tr|A5ACP0|A5ACP0_VITVI	IIIDSNNNPEHFLTTNPYYDSR	22	23	118.32	2622.24	HVHNALGKIIIDSNNN	TNPYYDSRVVGKYCEK	896	917	no	no	3	5.0677e-43		K	I	I	S	R	V	0	1	4	2	0	0	1	0	1	3	1	0	0	1	2	2	2	0	2	0	0	0	251440000	3325300	0	2765700	47668000	13185000
A5ACP0	tr|A5ACP0|A5ACP0_VITVI	KFNLNVQAVNVLLDNIQSIER	21	12	121.82	2426.33	EEAFAIFKKFNLNVQA	DNIQSIERAVEFAFRV	1088	1108	no	no	3	5.5187e-43		K	K	F	E	R	A	1	1	4	1	0	2	1	0	0	2	3	1	0	1	0	1	0	0	0	3	0	1	85683000	0	0	0	15915000	7612300
A5ACP0	tr|A5ACP0|A5ACP0_VITVI	LLTQFLEHLVSEGSQDVHVHNALGK	25	3	164.27	2770.44	CEKRNRLRLLTQFLEH	HVHNALGKIIIDSNNN	871	895	no	no	4	1.5325e-127		R	L	L	G	K	I	1	0	1	1	0	2	2	2	3	0	5	1	0	1	0	2	1	0	0	3	0	0	23380000	0	0	0	4642000	6103400
A5ACP0	tr|A5ACP0|A5ACP0_VITVI	LNAFESLELSR	11	3	71.085	1277.66	GTLLTRGKLNAFESLE	FESLELSRLVVNQNKK	440	450	no	no	2	0.0086398		K	L	N	S	R	L	1	1	1	0	0	0	2	0	0	0	3	0	0	1	0	2	0	0	0	0	0	0	95954000	0	0	2685700	21289000	12998000
A5ACP0	tr|A5ACP0|A5ACP0_VITVI	LVVNQNKKNLLENWLAEDK	19	1	22.051	2267.23	FESLELSRLVVNQNKK	ENWLAEDKLECSEELG	451	469	no	no	4	0.026074		R	L	V	D	K	L	1	0	4	1	0	1	2	0	0	0	4	3	0	0	0	0	0	1	0	2	0	2	55527000	0	0	0	0	0
A5ACP0	tr|A5ACP0|A5ACP0_VITVI	LYDEALYEAAK	11	37	135.99	1284.62	NLQNVGDRLYDEALYE	EALYEAAKIIFAFISN	1219	1229	no	no	2	3.5111e-15		R	L	Y	A	K	I	3	0	0	1	0	0	2	0	0	0	2	1	0	0	0	0	0	0	2	0	0	0	944610000	16749000	15886000	11923000	83604000	78078000
A5ACP0	tr|A5ACP0|A5ACP0_VITVI	QFQGAVDAAR	10	4	82.417	1061.53	ACTLVKLRQFQGAVDA	QGAVDAARKANSSKTW	1250	1259	no	no	2	0.00060928		R	Q	F	A	R	K	3	1	0	1	0	2	0	1	0	0	0	0	0	1	0	0	0	0	0	1	0	0	184530000	42717000	42375000	0	0	0
A5ACP0	tr|A5ACP0|A5ACP0_VITVI	QLIDQVVSTALPESK	15	15	178.22	1626.88	DPDNDYRRQLIDQVVS	STALPESKSPEQVSAA	983	997	no	no	2;3	2.9697e-79		R	Q	L	S	K	S	1	0	0	1	0	2	1	0	0	1	2	1	0	0	1	2	1	0	0	2	0	0	243580000	1501500	3452500	3490600	78019000	24941000
A5ACP0	tr|A5ACP0|A5ACP0_VITVI	RGNLPGAENLVVQR	14	0	40.941	1521.84	ELAVNLAKRGNLPGAE	AENLVVQRFQELFAQT	367	380	no	no	3	0.0036138		K	R	G	Q	R	F	1	2	2	0	0	1	1	2	0	0	2	0	0	0	1	0	0	0	0	2	0	1	1960400	0	0	1960400	0	0
A5ACP0	tr|A5ACP0|A5ACP0_VITVI	TANLVNNQIINYR	13	30	216.68	1531.81	EPVKMFERTANLVNNQ	NNQIINYRCDPSEKWL	151	163	no	no	2	2.6775e-127		R	T	A	Y	R	C	1	1	4	0	0	1	0	0	0	2	1	0	0	0	0	0	1	0	1	1	0	0	411610000	6990700	5135600	4756800	63098000	63343000
A5ACP0	tr|A5ACP0|A5ACP0_VITVI	VANVELYYK	9	7	81.95	1097.58	QFKDVAVKVANVELYY	ANVELYYKAVHFYLQE	1412	1420	no	no	2	0.0046049		K	V	A	Y	K	A	1	0	1	0	0	0	1	0	0	0	1	1	0	0	0	0	0	0	2	2	0	0	110310000	4069400	4312600	3969700	23309000	19579000
A5ACP0	tr|A5ACP0|A5ACP0_VITVI	VDSELIYAYAK	11	26	128.01	1270.64	RQKAKEPKVDSELIYA	ELIYAYAKIDRLGEIE	1183	1193	no	no	2	4.157e-12		K	V	D	A	K	I	2	0	0	1	0	0	1	0	0	1	1	1	0	0	0	1	0	0	2	1	0	0	731440000	9119000	15529000	9071900	87170000	84563000
A5ACP0	tr|A5ACP0|A5ACP0_VITVI	VEEDAVWSQVAK	12	32	196.15	1359.67	RAVEFAFRVEEDAVWS	AVWSQVAKAQLREGLV	1116	1127	no	no	2	1.5878e-80		R	V	E	A	K	A	2	0	0	1	0	1	2	0	0	0	0	1	0	0	0	1	0	1	0	3	0	0	997750000	16050000	14477000	15336000	126610000	103340000
A5ACP0	tr|A5ACP0|A5ACP0_VITVI	VIVNTHAIEPQALVEFFGTLSR	22	33	160.25	2440.31	TELPDIKRVIVNTHAI	EFFGTLSREWALECMK	653	674	no	no	2;3	6.723e-97		R	V	I	S	R	E	2	1	1	0	0	1	2	1	1	2	2	0	0	2	1	1	2	0	0	3	0	0	1292400000	5113600	6335300	0	87181000	80791000
A5ACP0	tr|A5ACP0|A5ACP0_VITVI	VMDYINR	7	15	170.94	909.438	AIKADPSRVMDYINRL	RVMDYINRLDNFDGPA	1054	1060	no	no	2	1.5472e-16		R	V	M	N	R	L	0	1	1	1	0	0	0	0	0	1	0	0	1	0	0	0	0	0	1	1	0	0	1050100000	17283000	17704000	13840000	160910000	107100000
A5ACP0	tr|A5ACP0|A5ACP0_VITVI	VVAAFAER	8	17	114.28	861.471	IKARATPKVVAAFAER	VVAAFAERREFDKILI	501	508	no	no	2	0.0025518		K	V	V	E	R	R	3	1	0	0	0	0	1	0	0	0	0	0	0	1	0	0	0	0	0	2	0	0	552880000	14204000	14300000	8523900	102070000	84856000
A5ACP0	tr|A5ACP0|A5ACP0_VITVI	WLVLIGIAPGSPERPQLVK	19	1	40.432	2072.21	YRCDPSEKWLVLIGIA	PERPQLVKGNMQLFSV	170	188	no	no	3	0.0027588		K	W	L	V	K	G	1	1	0	0	0	1	1	2	0	2	3	1	0	0	3	1	0	1	0	2	0	1	1839800	0	0	0	0	0
A5ACP0	tr|A5ACP0|A5ACP0_VITVI	YGLIYVITK	9	6	61.593	1068.62	VAMQISHKYGLIYVIT	GLIYVITKLGLLFVYD	283	291	no	no	2	0.014039		K	Y	G	T	K	L	0	0	0	0	0	0	0	1	0	2	1	1	0	0	0	0	1	0	2	1	0	0	157750000	1973500	3484700	1415500	19057000	5638700
A5ACP0	tr|A5ACP0|A5ACP0_VITVI	YIEGYVQK	8	15	83.206	998.507	LYTNNMLRYIEGYVQK	YIEGYVQKVNPSNAPL	813	820	no	no	2	0.0065648		R	Y	I	Q	K	V	0	0	0	0	0	1	1	1	0	1	0	1	0	0	0	0	0	0	2	1	0	0	429820000	8704600	12243000	5853500	61961000	63453000
A5ACR7	tr|A5ACR7|A5ACR7_VITVI	AFYEEEVKR	9	2	61.161	1169.57	GESQMLDKAFYEEEVK	FYEEEVKRLCLAFEQQ	292	300	yes	yes	2;3	0.014074		K	A	F	K	R	L	1	1	0	0	0	0	3	0	0	0	0	1	0	1	0	0	0	0	1	1	0	1	17767000	0	0	0	5764500	6161400
A5ACR7	tr|A5ACR7|A5ACR7_VITVI	ITSEDLDDMNIEIMR	15	20	132.08	1793.82	LAPYFSERITSEDLDD	DMNIEIMRNTLYKAYL	168	182	yes	yes	2	2.3171e-29	109;110	R	I	T	M	R	N	0	1	1	3	0	0	2	0	0	3	1	0	2	0	0	1	1	0	0	0	0	0	143990000	0	871090	0	52885000	33700000
A5ACR7	tr|A5ACR7|A5ACR7_VITVI	LGGATSEIMSDLLAFEADR	19	3	64.705	1994.96	DFYQFCQKLGGATSEI	LLAFEADRRAVNITIN	200	218	yes	yes	2;3	6.1859e-06		K	L	G	D	R	R	3	1	0	2	0	0	2	2	0	1	3	0	1	1	0	2	1	0	0	0	0	0	10249000	0	0	0	2136900	0
A5ACR7	tr|A5ACR7|A5ACR7_VITVI	LGGATSEIMSDLLAFEADRR	20	1	46.494	2151.06	DFYQFCQKLGGATSEI	LAFEADRRAVNITINS	200	219	yes	yes	3	0.00039968	111	K	L	G	R	R	A	3	2	0	2	0	0	2	2	0	1	3	0	1	1	0	2	1	0	0	0	0	1	25552000	0	0	0	0	14769000
A5ACR7	tr|A5ACR7|A5ACR7_VITVI	LVLVDTPLAPYFSER	15	23	143.93	1718.92	QNMRELYRLVLVDTPL	LAPYFSERITSEDLDD	153	167	yes	yes	2	6.5383e-47		R	L	V	E	R	I	1	1	0	1	0	0	1	0	0	0	3	0	0	1	2	1	1	0	1	2	0	0	459660000	5324100	4191300	2533200	131320000	89545000
A5ACR7	tr|A5ACR7|A5ACR7_VITVI	VHDSVVFIF	9	4	75.738	1061.55	VAQNQKSRVHDSVVFI	HDSVVFIF________	343	351	yes	yes	2	0.0056532		R	V	H	I	F	-	0	0	0	1	0	0	0	0	1	1	0	0	0	2	0	1	0	0	0	3	0	0	29832000	0	0	0	8735400	0
A5AD40	tr|A5AD40|A5AD40_VITVI	FPNMSPGAIDLLEK	14	1	43.557	1530.78	PRQQFQARFPNMSPGA	GAIDLLEKMLVFDPNR	293	306	yes	yes	2	0.020371		R	F	P	E	K	M	1	0	1	1	0	0	1	1	0	1	2	1	1	1	2	1	0	0	0	0	0	0	6181400	0	0	0	0	0
A5AD40	tr|A5AD40|A5AD40_VITVI	LITELIGSPDDSSLGFLR	18	21	128.59	1932.02	RDYVHQLRLITELIGS	DSSLGFLRSDNARRYV	253	270	yes	yes	2;3	3.1047e-37		R	L	I	L	R	S	0	1	0	2	0	0	1	2	0	2	4	0	0	1	1	3	1	0	0	0	0	0	179830000	1946800	0	1136200	28103000	20641000
A5AD40	tr|A5AD40|A5AD40_VITVI	MLVFDPNRR	9	4	68.224	1146.6	GAIDLLEKMLVFDPNR	LVFDPNRRITVEGALS	307	315	yes	yes	3	0.0016196		K	M	L	R	R	I	0	2	1	1	0	0	0	0	0	0	1	0	1	1	1	0	0	0	0	1	0	1	2608300	0	0	0	0	0
A5ADV7	tr|A5ADV7|A5ADV7_VITVI	FNAQEALEYGLIDR	14	14	143.93	1637.8	KDLRRMKRFNAQEALE	LEYGLIDRILRPPRVK	257	270	yes	yes	2	1.8161e-36		R	F	N	D	R	I	2	1	1	1	0	1	2	1	0	1	2	0	0	1	0	0	0	0	1	0	0	0	58135000	0	0	0	11385000	0
A5ADV7	tr|A5ADV7|A5ADV7_VITVI	IALQSPAGAAR	11	9	92.611	1053.59	RLAMPLSRIALQSPAG	QSPAGAARGQADDIRN	202	212	yes	yes	2	0.00028932		R	I	A	A	R	G	4	1	0	0	0	1	0	1	0	1	1	0	0	0	1	1	0	0	0	0	0	0	102190000	2890600	1942300	0	16862000	15402000
A5AE63	tr|A5AE63|A5AE63_VITVI	DPVKFEEYK	9	18	150.1	1153.57	FDPLGYSKDPVKFEEY	PVKFEEYKVKEIKNGR	180	188	yes	yes	2;3	4.8698e-09		K	D	P	Y	K	V	0	0	0	1	0	0	2	0	0	0	0	2	0	1	1	0	0	0	1	1	0	1	912300000	7411400	6606500	5189900	118480000	81238000
A5AE63	tr|A5AE63|A5AE63_VITVI	KYPGGAFDPLGYSK	14	29	95.57	1498.75	MEKDTEKKKYPGGAFD	FDPLGYSKDPVKFEEY	166	179	yes	yes	2;3	1.3188e-06		K	K	Y	S	K	D	1	0	0	1	0	0	0	3	0	0	1	2	0	1	2	1	0	0	2	0	0	1	442510000	4394700	2405100	1476100	65537000	63972000
A5AE63	tr|A5AE63|A5AE63_VITVI	LGEVPENLER	10	42	152.54	1154.59	DFGFDPLRLGEVPENL	EVPENLERYKESELIH	73	82	yes	yes	2	3.4367e-19		R	L	G	E	R	Y	0	1	1	0	0	0	3	1	0	0	2	0	0	0	1	0	0	0	0	1	0	0	4462100000	38631000	32152000	25100000	824620000	410370000
A5AE63	tr|A5AE63|A5AE63_VITVI	PPYLDGSAPGDFGFDPLR	18	11	80.738	1919.91	DWMPGQPRPPYLDGSA	DFGFDPLRLGEVPENL	55	72	yes	yes	2	6.0597e-07		R	P	P	L	R	L	1	1	0	3	0	0	0	3	0	0	2	0	0	2	4	1	0	0	1	0	0	0	45690000	0	1029700	0	7170000	5380900
A5AE63	tr|A5AE63|A5AE63_VITVI	YPGGAFDPLGYSK	13	33	157.5	1370.65	EKDTEKKKYPGGAFDP	FDPLGYSKDPVKFEEY	167	179	yes	yes	2	1.2165e-35		K	Y	P	S	K	D	1	0	0	1	0	0	0	3	0	0	1	1	0	1	2	1	0	0	2	0	0	0	722600000	3495100	6023300	6059000	109190000	63606000
A5AE63	tr|A5AE63|A5AE63_VITVI	YPGGAFDPLGYSKDPVKFEEYK	22	9	120.32	2506.21	EKDTEKKKYPGGAFDP	PVKFEEYKVKEIKNGR	167	188	yes	yes	3;4	4.173e-42		K	Y	P	Y	K	V	1	0	0	2	0	0	2	3	0	0	1	3	0	2	3	1	0	0	3	1	0	2	108920000	0	0	0	12458000	6919600
A5AEB4	tr|A5AEB4|A5AEB4_VITVI	AQVEEFYVITWDSPK	15	1	69.805	1810.88	STGGLLRKAQVEEFYV	VITWDSPKEQIFEMPT	88	102	yes	yes	2	0.00079772		K	A	Q	P	K	E	1	0	0	1	0	1	2	0	0	1	0	1	0	1	1	1	1	1	1	2	0	0	20324000	1062000	0	0	6579600	7208800
A5AEB4	tr|A5AEB4|A5AEB4_VITVI	KAQVEEFYVITWDSPK	16	2	44.998	1938.97	GSTGGLLRKAQVEEFY	VITWDSPKEQIFEMPT	87	102	yes	yes	3	0.0014144		R	K	A	P	K	E	1	0	0	1	0	1	2	0	0	1	0	2	0	1	1	1	1	1	1	2	0	1	18861000	0	0	0	0	5654500
A5AEB4	tr|A5AEB4|A5AEB4_VITVI	NVNPIEVK	8	21	101.72	911.508	VNFRSIGKNVNPIEVK	NVNPIEVKFTGKQAYD	188	195	yes	yes	2	0.0064318		K	N	V	V	K	F	0	0	2	0	0	0	1	0	0	1	0	1	0	0	1	0	0	0	0	2	0	0	727130000	5891500	0	3618400	77341000	84262000
A5AEB4	tr|A5AEB4|A5AEB4_VITVI	QGVGVNFR	8	1	98.009	875.461	PEKVNPGRQGVGVNFR	QGVGVNFRSIGKNVNP	176	183	yes	yes	2	0.0086492		R	Q	G	F	R	S	0	1	1	0	0	1	0	2	0	0	0	0	0	1	0	0	0	0	0	2	0	0	3399600000	45694000	56678000	32949000	511070000	289490000
A5AEB4	tr|A5AEB4|A5AEB4_VITVI	SIGKNVNPIEVK	12	1	56.569	1296.74	QGVGVNFRSIGKNVNP	NVNPIEVKFTGKQAYD	184	195	yes	yes	2	0.068116		R	S	I	V	K	F	0	0	2	0	0	0	1	1	0	2	0	2	0	0	1	1	0	0	0	2	0	1	0	0	0	0	0	0
A5AEB4	tr|A5AEB4|A5AEB4_VITVI	EAPVGFTPPELDPNTPSPIFGGSTGGLLR	29	8	87.991	2922.48	MAEEAPTKEAPVGFTP	GSTGGLLRKAQVEEFY	58	86	yes	no	3	2.2602e-39		K	E	A	L	R	K	1	1	1	1	0	0	2	5	0	1	3	0	0	2	6	2	3	0	0	1	0	0	95383000	0	0	2137600	32266000	10749000
A5AEB4	tr|A5AEB4|A5AEB4_VITVI	EQIFEMPTGGAAIMR	15	56	130.27	1649.79	VITWDSPKEQIFEMPT	TGGAAIMRQGPNLLKL	103	117	yes	no	2	6.4886e-30	112;113	K	E	Q	M	R	Q	2	1	0	0	0	1	2	2	0	2	0	0	2	1	1	0	1	0	0	0	0	0	675420000	9456700	4540500	3687900	164040000	92871000
A5AEB4	tr|A5AEB4|A5AEB4_VITVI	VFPNGEVQYLHPK	13	8	58.32	1526.79	KIKYQFYRVFPNGEVQ	EVQYLHPKDGVYPEKV	151	163	yes	no	2;3	0.00085971		R	V	F	P	K	D	0	0	1	0	0	1	1	1	1	0	1	1	0	1	2	0	0	0	1	2	0	0	63671000	0	1037900	1484600	0	7547200
A5AEB9	tr|A5AEB9|A5AEB9_VITVI	ESIELPLMNPELFLR	15	64	127.36	1799.95	SDQIRELRESIELPLM	MNPELFLRVGIKPPKG	152	166	yes	yes	2	6.4892e-29	114	R	E	S	L	R	V	0	1	1	0	0	0	3	0	0	1	4	0	1	1	2	1	0	0	0	0	0	0	593200000	8354100	11789000	4933500	67381000	56719000
A5AEB9	tr|D7U4M5|D7U4M5_VITVI	FSEGTSADREIQR	13	8	143.42	1494.71	IDAIGGRRFSEGTSAD	SADREIQRTLMELLNQ	249	261	no	no	2;3	4.4879e-25		R	F	S	Q	R	T	1	2	0	1	0	1	2	1	0	1	0	0	0	1	0	2	1	0	0	0	0	1	213490000	0	0	3226700	10839000	16997000
A5AEB9	tr|D7U4M5|D7U4M5_VITVI	KIEIPLPNEQSR	12	0	57.106	1422.78	LRPGRLDRKIEIPLPN	PLPNEQSRMEILKIHA	304	315	no	no	2	0.031063		R	K	I	S	R	M	0	1	1	0	0	1	2	0	0	2	1	1	0	0	2	1	0	0	0	0	0	1	5286100	0	0	0	0	5286100
A5AEB9	tr|D7U4M5|D7U4M5_VITVI	TLMELLNQLDGFDQLGK	17	20	157.37	1933.98	SADREIQRTLMELLNQ	DGFDQLGKVKMIMATN	262	278	no	no	2	1.2427e-68	115	R	T	L	G	K	V	0	0	1	2	0	2	1	2	0	0	5	1	1	1	0	0	1	0	0	0	0	0	207330000	0	1856900	1321900	48353000	26646000
A5AEB9	tr|D7U4M5|D7U4M5_VITVI	VVLDMTTLTIMR	12	1	52.071	1391.75	EKLTAGTRVVLDMTTL	MTTLTIMRALPREVDP	104	115	no	no	2	0.022467		R	V	V	M	R	A	0	1	0	1	0	0	0	0	0	1	2	0	2	0	0	0	3	0	0	2	0	0	23528000	1373400	0	0	9212800	5138100
A5AEB9	tr|D7U4M5|D7U4M5_VITVI	GVLLYGPPGTGK	12	11	57.175	1157.64	RVGIKPPKGVLLYGPP	YGPPGTGKTLLARAIA	175	186	no	no	2	0.0063053		K	G	V	G	K	T	0	0	0	0	0	0	0	4	0	0	2	1	0	0	2	0	1	0	1	1	0	0	339220000	4923900	5456000	6799500	34022000	18272000
A5AEB9	tr|D7U4M5|D7U4M5_VITVI	AIASNIDANFLK	12	21	132.32	1275.68	TGKTLLARAIASNIDA	NIDANFLKVVSSAIID	192	203	no	no	2	1.2395e-13		R	A	I	L	K	V	3	0	2	1	0	0	0	0	0	2	1	1	0	1	0	1	0	0	0	0	0	0	466460000	3799200	6490500	4846000	50724000	46920000
A5AEB9	tr|D7U4M5|D7U4M5_VITVI	EMFGYAR	7	2	81.381	872.385	GESARLIREMFGYARD	REMFGYARDHQPCIIF	223	229	no	no	2	0.018148		R	E	M	A	R	D	1	1	0	0	0	0	1	1	0	0	0	0	1	1	0	0	0	0	1	0	0	0	159340000	2391500	3021800	2097400	15360000	14395000
A5AEB9	tr|D7U4M5|D7U4M5_VITVI	VVSSAIIDK	9	9	91.069	930.539	NIDANFLKVVSSAIID	VSSAIIDKYIGESARL	204	212	no	no	1;2	0.014039		K	V	V	D	K	Y	1	0	0	1	0	0	0	0	0	2	0	1	0	0	0	2	0	0	0	2	0	0	436240000	5737900	5319000	4317500	35744000	43665000
A5AEH1	tr|A5AEH1|A5AEH1_VITVI	SAQDIATVELAPTHPIR	17	3	79.514	1817.96	ESTLAAYKSAQDIATV	LAPTHPIRLGLALNFS	157	173	yes	yes	2;3	6.4027e-07		K	S	A	I	R	L	3	1	0	1	0	1	1	0	1	2	1	0	0	0	2	1	2	0	0	1	0	0	116480000	6758300	10890000	6359200	28034000	15882000
A5AEH1	tr|A5AEH1|A5AEH1_VITVI	VTAEAEELTVEER	13	6	111.38	1474.72	EMVQFMEKVTAEAEEL	EELTVEERNLLSVAYK	33	45	yes	yes	2	1.1313e-08		K	V	T	E	R	N	2	1	0	0	0	0	5	0	0	0	1	0	0	0	0	0	2	0	0	2	0	0	207440000	3420200	5090300	4267700	39810000	22329000
A5AEH1	tr|A5AEH1|A5AEH1_VITVI	YEEMVQFMEK	10	7	115.57	1332.57	KLAEQAERYEEMVQFM	EMVQFMEKVTAEAEEL	23	32	yes	yes	2	1.5872e-06		R	Y	E	E	K	V	0	0	0	0	0	1	3	0	0	0	0	1	2	1	0	0	0	0	1	1	0	0	50950000	1109800	1492400	1434900	12649000	13109000
A5AEI0	tr|A5AEI0|A5AEI0_VITVI	GEWLPGLSSPSYLDGSLPGDNGFDPLGLAEDPENLK	36	3	21.01	3755.78	SFKVEAKKGEWLPGLS	AEDPENLKWYVQAELV	54	89	yes	yes	3	0.001579		K	G	E	L	K	W	1	0	2	4	0	0	3	6	0	0	7	1	0	1	5	4	0	1	1	0	0	0	38458000	0	0	0	0	9237300
A5AEI0	tr|A5AEI0|A5AEI0_VITVI	GPFDNLLQHISDPWHNTIIQTLR	23	7	189.09	2714.39	VQHNVTGKGPFDNLLQ	NTIIQTLRGF______	228	250	yes	yes	3;4	1.9222e-178		K	G	P	L	R	G	0	1	2	2	0	2	0	1	2	3	3	0	0	1	2	1	2	1	0	0	0	0	115020000	0	0	0	43037000	21284000
A5AEI0	tr|A5AEI0|A5AEI0_VITVI	IGIINAPQWYDAGK	14	31	174.39	1544.8	LLPEVFTKIGIINAPQ	PQWYDAGKAEYFASSS	118	131	yes	yes	2	8.4478e-65		K	I	G	G	K	A	2	0	1	1	0	1	0	2	0	3	0	1	0	0	1	0	0	1	1	0	0	0	3333900000	6404800	15068000	0	512640000	300270000
A5AEI0	tr|A5AEI0|A5AEI0_VITVI	NPGSVNQDPIFK	12	37	267.93	1314.66	IRRWQDIKNPGSVNQD	VNQDPIFKNYSLPPNE	162	173	yes	yes	2	6.1656e-263		K	N	P	F	K	N	0	0	2	1	0	1	0	1	0	1	0	1	0	1	2	1	0	0	0	1	0	0	2166900000	20742000	20939000	15128000	296910000	287680000
A5AEI0	tr|A5AEI0|A5AEI0_VITVI	NYSLPPNEVGYPGGIFNPLNFAPTEEAK	28	32	87.28	3034.47	VNQDPIFKNYSLPPNE	FAPTEEAKEKELANGR	174	201	yes	yes	3	1.3473e-32		K	N	Y	A	K	E	2	0	4	0	0	0	3	3	0	1	2	1	0	2	5	1	1	0	2	1	0	0	310530000	5600100	5998500	2249100	88915000	62398000
A5AEI0	tr|A5AEI0|A5AEI0_VITVI	NYSLPPNEVGYPGGIFNPLNFAPTEEAKEK	30	1	32.266	3291.61	VNQDPIFKNYSLPPNE	PTEEAKEKELANGRLA	174	203	yes	yes	3	0.00018641		K	N	Y	E	K	E	2	0	4	0	0	0	4	3	0	1	2	2	0	2	5	1	1	0	2	1	0	1	32398000	0	0	0	13013000	0
A5AEI0	tr|A5AEI0|A5AEI0_VITVI	WAMLGVAGMLLPEVFTK	17	130	159.18	1861.98	QAELVNSRWAMLGVAG	LLPEVFTKIGIINAPQ	101	117	yes	yes	2;3	6.1654e-69	117;118	R	W	A	T	K	I	2	0	0	0	0	0	1	2	0	0	3	1	2	1	1	0	1	1	0	2	0	0	1588900000	6686200	8530000	4165000	215620000	180430000
A5AEI0	tr|A5AEI0|A5AEI0_VITVI	WQDIKNPGSVNQDPIFK	17	15	157.11	1985	FHYVEIRRWQDIKNPG	VNQDPIFKNYSLPPNE	157	173	yes	yes	3	6.8096e-69		R	W	Q	F	K	N	0	0	2	2	0	2	0	1	0	2	0	2	0	1	2	1	0	1	0	1	0	1	235220000	0	0	0	29829000	44770000
A5AEI0	tr|A5AEI0|A5AEI0_VITVI	WYVQAELVNSR	11	31	171.67	1363.69	AEDPENLKWYVQAELV	QAELVNSRWAMLGVAG	90	100	yes	yes	2	2.7601e-42		K	W	Y	S	R	W	1	1	1	0	0	1	1	0	0	0	1	0	0	0	0	1	0	1	1	2	0	0	390000000	2945200	5521300	0	65545000	73586000
A5AF64	tr|A5AF64|A5AF64_VITVI	AITGFIAR	8	20	133.6	847.492	WNTYWGRRAITGFIAR	AITGFIARYPDAELRT	269	276	yes	yes	2	0.00035996		R	A	I	A	R	Y	2	1	0	0	0	0	0	1	0	2	0	0	0	1	0	0	1	0	0	0	0	0	412520000	2773100	2330200	2088200	35732000	41106000
A5AF64	tr|A5AF64|A5AF64_VITVI	DMSPEFIR	8	1	69.825	993.459	VDINQSNRDMSPEFIR	DMSPEFIRWLGERNLS	392	399	yes	yes	2	0.015058		R	D	M	I	R	W	0	1	0	1	0	0	1	0	0	1	0	0	1	1	1	1	0	0	0	0	0	0	0	0	0	0	0	0
A5AF64	tr|A5AF64|A5AF64_VITVI	HVVDFYISDFQSGLR	15	17	115.79	1781.87	WGLRSLERHVVDFYIS	SDFQSGLRALVKTGYG	349	363	yes	yes	2;3	2.6538e-17		R	H	V	L	R	A	0	1	0	2	0	1	0	1	1	1	1	0	0	2	0	2	0	0	1	2	0	0	71327000	0	0	0	16795000	4563000
A5AF64	tr|A5AF64|A5AF64_VITVI	VTPYVDESVVVDINQSNR	18	5	64.249	2033.01	VKTGYGARVTPYVDES	VDINQSNRDMSPEFIR	374	391	yes	yes	2	9.7815e-05		R	V	T	N	R	D	0	1	2	2	0	1	1	0	0	1	0	0	0	0	1	2	1	0	1	5	0	0	25216000	0	0	0	8692100	7958300
A5AF64	tr|A5AF64|A5AF64_VITVI	YPDAELR	7	11	112.59	862.418	AITGFIARYPDAELRT	RYPDAELRTARDGQFV	277	283	yes	yes	2	0.012241		R	Y	P	L	R	T	1	1	0	1	0	0	1	0	0	0	1	0	0	0	1	0	0	0	1	0	0	0	297130000	3294900	4369400	3174800	5580500	0
A5AFH3	tr|A5AFH3|A5AFH3_VITVI	GSPATFSISANTGETITGGK	20	35	174.02	1894.93	ISPYPVVRGSPATFSI	GETITGGKLVIDVSYF	54	73	yes	yes	2	2.7779e-108		R	G	S	G	K	L	2	0	1	0	0	0	1	4	0	2	0	1	0	1	1	3	4	0	0	0	0	0	239900000	5421800	3793300	6078600	48712000	37002000
A5AFH3	tr|A5AFH3|A5AFH3_VITVI	NADYDVTVQGVEISPYPVVR	20	18	161.51	2220.11	VDVTYCDKNADYDVTV	ISPYPVVRGSPATFSI	34	53	yes	yes	2	9.3375e-95		K	N	A	V	R	G	1	1	1	2	0	1	1	1	0	1	0	0	0	0	2	1	1	0	2	5	0	0	175670000	3034600	3401400	1849000	34442000	37417000
A5AFS1	tr|A5AFS1|A5AFS1_VITVI	EHALLAFTLGVK	12	19	141.58	1297.74	ISKDGQTREHALLAFT	LAFTLGVKQMICCCNK	135	146	yes	no	2;3	1.535e-24		R	E	H	V	K	Q	2	0	0	0	0	0	1	1	1	0	3	1	0	1	0	0	1	0	0	1	0	0	74612000	3207200	1309100	0	6884600	27044000
A5AFS1	tr|A5AFS1|A5AFS1_VITVI	VETGVLKPGMVVTFGPSGLTTEVK	24	51	211.75	2445.32	IGTVPVGRVETGVLKP	SGLTTEVKSVEMHHES	255	278	yes	no	2;3	3.6505e-218	121	R	V	E	V	K	S	0	0	0	0	0	0	2	4	0	0	2	2	1	1	2	1	4	0	0	5	0	1	938750000	20292000	22237000	25144000	248950000	169570000
A5AFX4	tr|A5AFX4|A5AFX4_VITVI	RGDFAPSSFSDVFDPFSPTR	20	4	74.364	2231.03	LSDRSFSRRGDFAPSS	FDPFSPTRSLSQVLNL	60	79	yes	yes	3	1.7931e-10		R	R	G	T	R	S	1	2	0	3	0	0	0	1	0	0	0	0	0	4	3	4	1	0	0	1	0	1	60410000	0	0	0	23565000	7715300
A5AFX4	tr|A5AFX4|A5AFX4_VITVI	SLSQVLNLMDHFMDNPFLSTSR	22	3	45.363	2551.22	FDPFSPTRSLSQVLNL	NPFLSTSRGMGTGIRR	80	101	yes	yes	3	0.00011899		R	S	L	S	R	G	0	1	2	2	0	1	0	0	1	0	4	0	2	2	1	4	1	0	0	1	0	0	5312900	0	0	0	3104100	2208700
A5AGD5	tr|A5AGD5|A5AGD5_VITVI	GTFVLQDNK	9	1	54.419	1020.52	DNLKTNHRGTFVLQDN	TFVLQDNKFRWLSRMS	91	99	yes	yes	2	0.025806		R	G	T	N	K	F	0	0	1	1	0	1	0	1	0	0	1	1	0	1	0	0	1	0	0	1	0	0	59350000	0	0	0	0	10973000
A5AGD5	tr|A5AGD5|A5AGD5_VITVI	RIEAIGYQVGHQLSER	16	4	58.246	1854.97	DKPDLAARRIEAIGYQ	VGHQLSERYTMERPRF	36	51	yes	yes	3	0.00027444		R	R	I	E	R	Y	1	2	0	0	0	2	2	2	1	2	1	0	0	0	0	1	0	0	1	1	0	1	56616000	0	0	0	13657000	0
A5AGN5	tr|A5AGN5|A5AGN5_VITVI	DGLPAFPMGK	10	1	36.684	1031.51	AGRRFYEKDGLPAFPM	LPAFPMGKIDQTRMWK	417	426	yes	yes	2	0.05166		K	D	G	G	K	I	1	0	0	1	0	0	0	2	0	0	1	1	1	1	2	0	0	0	0	0	0	0	87951000	953850	1944300	0	12867000	6377500
A5AGN5	tr|A5AGN5|A5AGN5_VITVI	DSLVEAKSNIVVKIGLR	17	1	36.597	1840.08	PAQAQNLRDSLVEAKS	IVVKIGLRKGSKSFAE	137	153	yes	yes	3	0.025451		R	D	S	L	R	K	1	1	1	1	0	0	1	1	0	2	2	2	0	0	0	2	0	0	0	3	0	2	0	0	0	0	0	0
A5AGN5	tr|A5AGN5|A5AGN5_VITVI	FDYIITQQALVAVDNGVPINR	21	8	129.02	2345.24	GSRKWAPRFDYIITQQ	DNGVPINRDLISNFLS	523	543	yes	yes	2;3	3.4524e-53		R	F	D	N	R	D	2	1	2	2	0	2	0	1	0	3	1	0	0	1	1	0	1	0	1	3	0	0	108880000	0	3398800	0	26503000	39374000
A5AGN5	tr|A5AGN5|A5AGN5_VITVI	GHSYSEIINESVIESVDSLNPFMHAR	26	6	128.07	2930.39	QIEILRKKGHSYSEII	LNPFMHARGVSFMVDN	474	499	yes	yes	3;4	4.2956e-75		K	G	H	A	R	G	1	1	2	1	0	0	3	1	2	3	1	0	1	1	1	5	0	0	1	2	0	0	50077000	0	0	0	24810000	2088600
A5AGN5	tr|A5AGN5|A5AGN5_VITVI	QIGVIGWGSQGPAQAQNLR	19	28	204.13	1979.03	PDAFKGIKQIGVIGWG	PAQAQNLRDSLVEAKS	118	136	yes	yes	2;3	8.1627e-157		K	Q	I	L	R	D	2	1	1	0	0	4	0	4	0	2	1	0	0	0	1	1	0	1	0	1	0	0	219830000	7402600	8442700	6366500	59222000	30367000
A5AGN5	tr|A5AGN5|A5AGN5_VITVI	SDIFGER	7	2	82.671	822.387	TTLEQEYKSDIFGERG	KSDIFGERGILLGAVH	305	311	yes	yes	2	0.020869		K	S	D	E	R	G	0	1	0	1	0	0	1	1	0	1	0	0	0	1	0	1	0	0	0	0	0	0	19064000	8754700	10309000	0	0	0
A5AGN5	tr|A5AGN5|A5AGN5_VITVI	VSLAGHDEYIVR	12	19	94.547	1357.7	TSVFKKEKVSLAGHDE	GHDEYIVRGGRDLFHL	89	100	yes	yes	2;3	3.1542e-05		K	V	S	V	R	G	1	1	0	1	0	0	1	1	1	1	1	0	0	0	0	1	0	0	1	2	0	0	412790000	4695600	10126000	13119000	84525000	45175000
A5AGN5	tr|A5AGN5|A5AGN5_VITVI	YTEHGTSEDLAYK	13	5	84.365	1512.67	IVESLFRRYTEHGTSE	TSEDLAYKNTVECITG	329	341	yes	yes	2;3	0.00032029		R	Y	T	Y	K	N	1	0	0	1	0	0	2	1	1	0	1	1	0	0	0	1	2	0	2	0	0	0	31689000	3767700	0	0	6099900	2665500
A5AGN5	tr|A5AGN5|A5AGN5_VITVI	DLFHLLPDAFK	11	56	136.53	1314.7	EYIVRGGRDLFHLLPD	HLLPDAFKGIKQIGVI	104	114	yes	no	2;3	3.2555e-15		R	D	L	F	K	G	1	0	0	2	0	0	0	0	1	0	3	1	0	2	1	0	0	0	0	0	0	0	331910000	13924000	6185400	5123400	41629000	32415000
A5AH05	tr|A5AH05|A5AH05_VITVI	AFLNSPVGPK	10	2	70.929	1028.57	________________	LNSPVGPKTTHFWGPI	6	15	yes	yes	2	0.0050738		R	A	F	P	K	T	1	0	1	0	0	0	0	1	0	0	1	1	0	1	2	1	0	0	0	1	0	0	101050000	2703900	3515800	3142300	0	0
A5AH05	tr|A5AH05|A5AH05_VITVI	FAWMVQPR	8	26	134.66	1033.52	VYSALFMRFAWMVQPR	FAWMVQPRNYLLLACH	61	68	yes	yes	2	2.7314e-09	122	R	F	A	P	R	N	1	1	0	0	0	1	0	0	0	0	0	0	1	1	1	0	0	1	0	1	0	0	351170000	3137500	2652200	3971700	37493000	29062000
A5AH72	tr|A5AH72|A5AH72_VITVI	ALMDEMAVIATK	12	50	122.46	1291.65	VSPKPEWRALMDEMAV	EMAVIATKEYRSIVFQ	709	720	yes	yes	2	1.3564e-11	124;125	R	A	L	T	K	E	3	0	0	1	0	0	1	0	0	1	1	1	2	0	0	0	1	0	0	1	0	0	571390000	15511000	21697000	17264000	162600000	117970000
A5AH72	tr|A5AH72|A5AH72_VITVI	DPNYHVMERPHLSK	14	0	61.167	1721.83	AYTLKRIRDPNYHVME	MERPHLSKEIMESSKP	908	921	yes	yes	4	0.0010061	126	R	D	P	S	K	E	0	1	1	1	0	0	1	0	2	0	1	1	1	0	2	1	0	0	1	1	0	1	8114500	0	0	608650	0	1523000
A5AH72	tr|A5AH72|A5AH72_VITVI	EIMESSKPAAELVK	14	7	157.86	1530.8	MERPHLSKEIMESSKP	KPAAELVKLNPTSEYA	922	935	yes	yes	2	8.6709e-44	127	K	E	I	V	K	L	2	0	0	0	0	0	3	0	0	1	1	2	1	0	1	2	0	0	0	1	0	1	56017000	2382200	1595400	0	16205000	16034000
A5AH72	tr|A5AH72|A5AH72_VITVI	FSAAWQLYK	9	5	76.221	1112.57	DSGKDAGRFSAAWQLY	SAAWQLYKAQEALVKV	605	613	yes	yes	2	0.0055716		R	F	S	Y	K	A	2	0	0	0	0	1	0	0	0	0	1	1	0	1	0	1	0	1	1	0	0	0	178070000	5973000	5487100	2507900	43029000	27240000
A5AH72	tr|A5AH72|A5AH72_VITVI	FTAATLEHGMHPPVSPKPEWR	21	19	171.83	2387.18	LCFRTLQRFTAATLEH	VSPKPEWRALMDEMAV	688	708	yes	yes	3;4;5	4.8815e-125	128	R	F	T	W	R	A	2	1	0	0	0	0	2	1	2	0	1	1	1	1	4	1	2	1	0	1	0	1	313470000	9781700	7266600	6012900	94403000	80616000
A5AH72	tr|A5AH72|A5AH72_VITVI	GDPGIAALYDR	11	12	111.26	1146.57	LVEMVFAKGDPGIAAL	GIAALYDRLLVSEELW	830	840	yes	yes	2	1.2123e-06		K	G	D	D	R	L	2	1	0	2	0	0	0	2	0	1	1	0	0	0	1	0	0	0	1	0	0	0	1380300000	44197000	41248000	27893000	237580000	146890000
A5AH72	tr|A5AH72|A5AH72_VITVI	HDPQKLEELGR	11	3	70.089	1320.68	LSAEYEGKHDPQKLEE	QKLEELGRVITSLDAG	71	81	yes	yes	3	0.0015062		K	H	D	G	R	V	0	1	0	1	0	1	2	1	1	0	2	1	0	0	1	0	0	0	0	0	0	1	5568800	1698000	2692300	1178500	0	0
A5AH72	tr|A5AH72|A5AH72_VITVI	HTDVMDAITK	10	16	183.33	1129.54	DIRQESDRHTDVMDAI	DVMDAITKHLEIGSYR	456	465	yes	yes	2	7.1237e-56		R	H	T	T	K	H	1	0	0	2	0	0	0	0	1	1	0	1	1	0	0	0	2	0	0	1	0	0	200210000	5077900	7089200	6052500	47825000	38997000
A5AH72	tr|A5AH72|A5AH72_VITVI	IRDPNYHVMER	11	6	101.55	1428.69	CQAYTLKRIRDPNYHV	PNYHVMERPHLSKEIM	906	916	yes	yes	3;4	6.3143e-05		R	I	R	E	R	P	0	2	1	1	0	0	1	0	1	1	0	0	1	0	1	0	0	0	1	1	0	1	124890000	1175100	1024800	1097800	24506000	36498000
A5AH72	tr|A5AH72|A5AH72_VITVI	IRDPNYHVMERPHLSK	16	17	97.129	1991.02	CQAYTLKRIRDPNYHV	MERPHLSKEIMESSKP	906	921	yes	yes	3;4;5	1.491e-07	126	R	I	R	S	K	E	0	2	1	1	0	0	1	0	2	1	1	1	1	0	2	1	0	0	1	1	0	2	286320000	0	0	0	56089000	63067000
A5AH72	tr|A5AH72|A5AH72_VITVI	LFSIDWYR	8	23	144.38	1098.55	AAPAAVARLFSIDWYR	LFSIDWYRNRIDGKQE	575	582	yes	yes	2	5.3405e-06		R	L	F	Y	R	N	0	1	0	1	0	0	0	0	0	1	1	0	0	1	0	1	0	1	1	0	0	0	324880000	3030100	7908700	4967600	118110000	1328500
A5AH72	tr|A5AH72|A5AH72_VITVI	LLLQIAGHR	9	37	149.65	1019.62	TNYEETKRLLLQIAGH	LLQIAGHRDLLEGDPY	864	872	yes	yes	2	5.5167e-10		R	L	L	H	R	D	1	1	0	0	0	1	0	1	1	1	3	0	0	0	0	0	0	0	0	0	0	0	1444800000	12069000	15572000	10541000	295910000	228570000
A5AH72	tr|A5AH72|A5AH72_VITVI	LLVSEELWLFGK	12	18	134.98	1432.8	GIAALYDRLLVSEELW	EELWLFGKRLRTNYEE	841	852	yes	yes	2	3.3313e-16		R	L	L	G	K	R	0	0	0	0	0	0	2	1	0	0	4	1	0	1	0	1	0	1	0	1	0	0	319360000	6166200	810930	0	74368000	80489000
A5AH72	tr|A5AH72|A5AH72_VITVI	NLPMLQQMYNEWPFFR	16	20	94.487	2112.99	HVIGRDPRNLPMLQQM	YNEWPFFRVTIDLVEM	802	817	yes	yes	2;3	3.0653e-08	129;130	R	N	L	F	R	V	0	1	2	0	0	2	1	0	0	0	2	0	2	2	2	0	0	1	1	0	0	0	197590000	7310900	2765100	2313100	17280000	4457500
A5AH72	tr|A5AH72|A5AH72_VITVI	QVPPSEPYR	9	4	78.816	1071.53	KHYIEFWKQVPPSEPY	VPPSEPYRVILGDVRD	358	366	yes	yes	2	0.0051338		K	Q	V	Y	R	V	0	1	0	0	0	1	1	0	0	0	0	0	0	0	3	1	0	0	1	1	0	0	223530000	5763500	4679200	1626100	31151000	23948000
A5AH72	tr|A5AH72|A5AH72_VITVI	RQEWLLAELR	10	20	162.93	1312.73	YREWSEERRQEWLLAE	EWLLAELRGKRPLFGP	480	489	yes	yes	2;3	4.1724e-25		R	R	Q	L	R	G	1	2	0	0	0	1	2	0	0	0	3	0	0	0	0	0	0	1	0	0	0	1	397900000	1820900	2622000	2951700	115490000	98234000
A5AH72	tr|A5AH72|A5AH72_VITVI	TAPTPQDEMR	10	2	70.942	1144.52	FRTDEIRRTAPTPQDE	PTPQDEMRAGMSYFHE	228	237	yes	yes	2	0.0050664		R	T	A	M	R	A	1	1	0	1	0	1	1	0	0	0	0	0	1	0	2	0	2	0	0	0	0	0	9229500	4267000	4962400	0	0	0
A5AH72	tr|A5AH72|A5AH72_VITVI	VILGDVR	7	17	101.69	770.465	VPPSEPYRVILGDVRD	RVILGDVRDKLYSTRE	367	373	yes	yes	2	0.015466		R	V	I	V	R	D	0	1	0	1	0	0	0	1	0	1	1	0	0	0	0	0	0	0	0	2	0	0	1949800000	53028000	53139000	32276000	313820000	226010000
A5AH72	tr|A5AH72|A5AH72_VITVI	VITSLDAGDSIVVAK	15	3	71.08	1486.82	QKLEELGRVITSLDAG	GDSIVVAKSFSNMLTL	82	96	yes	yes	2	0.00072576		R	V	I	A	K	S	2	0	0	2	0	0	0	1	0	2	1	1	0	0	0	2	1	0	0	3	0	0	64019000	6015800	4735600	5771000	17003000	7285600
A5AH72	tr|A5AH72|A5AH72_VITVI	AGMSYFHETIWK	12	36	178.1	1468.68	PTPQDEMRAGMSYFHE	YFHETIWKGVPKFLRR	238	249	no	no	2;3	1.2113e-44	123	R	A	G	W	K	G	1	0	0	0	0	0	1	1	1	1	0	1	1	1	0	1	1	1	1	0	0	0	382610000	4840100	4349200	10204000	77504000	68273000
A5AH72	tr|A5AH72|A5AH72_VITVI	AIPWIFAWTQTR	12	65	186.24	1488.79	SGGIESLRAIPWIFAW	IFAWTQTRFHLPVWLG	768	779	no	no	2;3	1.013e-54		R	A	I	T	R	F	2	1	0	0	0	1	0	0	0	2	0	0	0	1	1	0	2	2	0	0	0	0	1651300000	9644400	8249000	5375900	200440000	90351000
A5AH72	tr|A5AH72|A5AH72_VITVI	DITPDDKQELDEALQR	16	21	166.9	1884.91	CLAQLYAKDITPDDKQ	ELDEALQREIQAAFRT	199	214	no	no	2;3	6.7789e-67		K	D	I	Q	R	E	1	1	0	4	0	2	2	0	0	1	2	1	0	0	1	0	1	0	0	0	0	1	248650000	3642400	3955800	5323600	48975000	44019000
A5AH72	tr|A5AH72|A5AH72_VITVI	DLLEGDPYLK	10	31	105.52	1161.59	LLQIAGHRDLLEGDPY	LEGDPYLKQRLRLRDA	873	882	no	no	1;2	8.1999e-05		R	D	L	L	K	Q	0	0	0	2	0	0	1	1	0	0	3	1	0	0	1	0	0	0	1	0	0	0	1100800000	13825000	25121000	21728000	198780000	108640000
A5AH72	tr|A5AH72|A5AH72_VITVI	EIQAAFR	7	5	99.384	833.44	ELDEALQREIQAAFRT	REIQAAFRTDEIRRTA	215	221	no	no	2	0.015608		R	E	I	F	R	T	2	1	0	0	0	1	1	0	0	1	0	0	0	1	0	0	0	0	0	0	0	0	83223000	21818000	23057000	8060500	0	0
A5AH72	tr|A5AH72|A5AH72_VITVI	FHLPVWLGFGGAFK	14	19	72.29	1574.84	IFAWTQTRFHLPVWLG	LGFGGAFKHVIGRDPR	780	793	no	no	2;3	0.00022966		R	F	H	F	K	H	1	0	0	0	0	0	0	3	1	0	2	1	0	3	1	0	0	1	0	1	0	0	68634000	0	0	0	0	3265200
A5AH72	tr|A5AH72|A5AH72_VITVI	GGGPTHLAILSQPPDTIHGSLR	22	58	137.72	2223.18	GRGGTVGRGGGPTHLA	DTIHGSLRVTVQGEVI	642	663	no	no	2;3;4	3.4587e-67		R	G	G	L	R	V	1	1	0	1	0	1	0	4	2	2	3	0	0	0	3	2	2	0	0	0	0	0	1090700000	33365000	24394000	32570000	275690000	247810000
A5AH72	tr|A5AH72|A5AH72_VITVI	HLEIGSYR	8	9	106.94	973.498	DVMDAITKHLEIGSYR	HLEIGSYREWSEERRQ	466	473	no	no	2	0.0016561		K	H	L	Y	R	E	0	1	0	0	0	0	1	1	1	1	1	0	0	0	0	1	0	0	1	0	0	0	183030000	18654000	16087000	15219000	8864800	0
A5AH72	tr|A5AH72|A5AH72_VITVI	HYIEFWK	7	8	113.7	1021.5	RSSRRDAKHYIEFWKQ	KHYIEFWKQVPPSEPY	351	357	no	no	2	0.0011665		K	H	Y	W	K	Q	0	0	0	0	0	0	1	0	1	1	0	1	0	1	0	0	0	1	1	0	0	0	114760000	1338400	0	1337600	0	0
A5AH72	tr|A5AH72|A5AH72_VITVI	LADLEAAPAAVAR	13	31	157.22	1266.69	RVVPLFEKLADLEAAP	AAPAAVARLFSIDWYR	562	574	no	no	2	1.3132e-35		K	L	A	A	R	L	6	1	0	1	0	0	1	0	0	0	2	0	0	0	1	0	0	0	0	1	0	0	1012000000	31030000	37527000	33455000	172390000	129570000
A5AH72	tr|A5AH72|A5AH72_VITVI	LATPELEYGR	10	30	130.41	1147.59	PRFVEYFRLATPELEY	TPELEYGRMNIGSRPS	738	747	no	no	2	7.7212e-08		R	L	A	G	R	M	1	1	0	0	0	0	2	1	0	0	2	0	0	0	1	0	1	0	1	0	0	0	3167200000	105730000	86075000	64119000	574760000	389010000
A5AH72	tr|A5AH72|A5AH72_VITVI	NQTVDLVLTAHPTQSVR	17	23	165.16	1878	EEVFDALKNQTVDLVL	AHPTQSVRRSLLQKHA	162	178	no	no	2;3	2.0978e-79		K	N	Q	V	R	R	1	1	1	1	0	2	0	0	1	0	2	0	0	0	1	1	3	0	0	3	0	0	169960000	4665200	6281800	6453300	20471000	58984000
A5AH72	tr|A5AH72|A5AH72_VITVI	PIADGSLLDFLR	12	4	114.72	1315.71	SLCACGDRPIADGSLL	GSLLDFLRQVSTFGLS	424	435	no	no	2	5.6164e-08		R	P	I	L	R	Q	1	1	0	2	0	0	0	1	0	1	3	0	0	1	1	1	0	0	0	0	0	0	31953000	0	0	0	0	9284000
A5AH72	tr|A5AH72|A5AH72_VITVI	PLFGPDLPK	9	8	66.273	982.549	LAELRGKRPLFGPDLP	LFGPDLPKTEEIADVL	493	501	no	no	2	0.0095638		R	P	L	P	K	T	0	0	0	1	0	0	0	1	0	0	2	1	0	1	3	0	0	0	0	0	0	0	125090000	3985800	2653900	2408800	38029000	31494000
A5AH72	tr|A5AH72|A5AH72_VITVI	QEVMIGYSDSGK	12	22	118.76	1312.6	YRNRIDGKQEVMIGYS	IGYSDSGKDAGRFSAA	589	600	no	no	2	2.7425e-11	131	K	Q	E	G	K	D	0	0	0	1	0	1	1	2	0	1	0	1	1	0	0	2	0	0	1	1	0	0	100040000	2254700	3068000	1809500	22828000	17739000
A5AH72	tr|A5AH72|A5AH72_VITVI	QVSTFGLSLVR	11	14	101.5	1205.68	GSLLDFLRQVSTFGLS	TFGLSLVRLDIRQESD	436	446	no	no	2	0.00013159		R	Q	V	V	R	L	0	1	0	0	0	1	0	1	0	0	2	0	0	1	0	2	1	0	0	2	0	0	371760000	0	25212000	0	145750000	0
A5AH72	tr|A5AH72|A5AH72_VITVI	RPLFGPDLPK	10	17	64.103	1138.65	LLAELRGKRPLFGPDL	LFGPDLPKTEEIADVL	492	501	no	no	2;3	0.0043993		K	R	P	P	K	T	0	1	0	1	0	0	0	1	0	0	2	1	0	1	3	0	0	0	0	0	0	1	233250000	6817200	9139400	7664000	56826000	37908000
A5AH72	tr|A5AH72|A5AH72_VITVI	SIVFQEPR	8	24	110.38	974.519	VIATKEYRSIVFQEPR	SIVFQEPRFVEYFRLA	724	731	no	no	2	0.0031172		R	S	I	P	R	F	0	1	0	0	0	1	1	0	0	1	0	0	0	1	1	1	0	0	0	1	0	0	2467900000	62352000	78332000	44064000	501910000	442310000
A5AH72	tr|A5AH72|A5AH72_VITVI	VPYNAPLIQFSSWMGGDR	18	46	202.35	2036.98	KNIGIDERVPYNAPLI	SSWMGGDRDGNPRVTP	271	288	no	no	2;3	4.9694e-138		R	V	P	D	R	D	1	1	1	1	0	1	0	2	0	1	1	0	1	1	2	2	0	1	1	1	0	0	496000000	5177800	8142600	5619500	113080000	80077000
A5AH72	tr|A5AH72|A5AH72_VITVI	VPYNAPLIQFSSWMGGDRDGNPR	23	28	88.872	2576.22	KNIGIDERVPYNAPLI	GDRDGNPRVTPEVTRD	271	293	no	no	3	1.1884e-23	132	R	V	P	P	R	V	1	2	2	2	0	1	0	3	0	1	1	0	1	1	3	2	0	1	1	1	0	1	315770000	1487700	2075400	5219100	95806000	23991000
A5AH72	tr|A5AH72|A5AH72_VITVI	VSEDDKLVEYDALLLDR	17	3	53.768	1992.01	LRLLAPAKVSEDDKLV	YDALLLDRFLDILQEI	24	40	no	no	3	0.00098337		K	V	S	D	R	F	1	1	0	4	0	0	2	0	0	0	4	1	0	0	0	1	0	0	1	2	0	1	10970000	0	0	1433000	9537200	0
A5AH72	tr|A5AH72|A5AH72_VITVI	VTIDLVEMVFAK	12	80	178.95	1363.74	YNEWPFFRVTIDLVEM	LVEMVFAKGDPGIAAL	818	829	no	no	2	2.2796e-54	133	R	V	T	A	K	G	1	0	0	1	0	0	1	0	0	1	1	1	1	1	0	0	1	0	0	3	0	0	1269200000	22533000	15099000	9651000	213600000	202070000
A5AH72	tr|A5AH72|A5AH72_VITVI	VTPEVTR	7	1	58.917	800.439	GDRDGNPRVTPEVTRD	RVTPEVTRDVCLLARM	294	300	no	no	2	0.074383		R	V	T	T	R	D	0	1	0	0	0	0	1	0	0	0	0	0	0	0	1	0	2	0	0	2	0	0	505420	0	0	0	107140	0
A5AH72	tr|A5AH72|A5AH72_VITVI	VVPLFEK	7	12	79.451	830.49	CHVKKPLRVVPLFEKL	RVVPLFEKLADLEAAP	555	561	no	no	2	0.027256		R	V	V	E	K	L	0	0	0	0	0	0	1	0	0	0	1	1	0	1	1	0	0	0	0	2	0	0	607950000	12924000	13523000	9402000	126350000	114810000
A5AHP0	tr|A5AHP0|A5AHP0_VITVI	AINYLLTHVDR	11	37	146.08	1313.71	LFTCAQDRAINYLLTH	YLLTHVDRVPEWGELL	203	213	yes	yes	2;3	2.9005e-20		R	A	I	D	R	V	1	1	1	1	0	0	0	0	1	1	2	0	0	0	0	0	1	0	1	1	0	0	1097400000	5922000	5110700	4509000	68681000	27739000
A5AHP0	tr|A5AHP0|A5AHP0_VITVI	ALSSPNLDIR	10	21	126.71	1084.59	DMIMDVLRALSSPNLD	SSPNLDIRRKTLDIVL	324	333	yes	yes	2	1.4348e-07		R	A	L	I	R	R	1	1	1	1	0	0	0	0	0	1	2	0	0	0	1	2	0	0	0	0	0	0	1166900000	12393000	12390000	14016000	125930000	89604000
A5AHP0	tr|A5AHP0|A5AHP0_VITVI	EIMVDMIMDVLR	12	73	159.44	1463.72	NELKSSHREIMVDMIM	DMIMDVLRALSSPNLD	312	323	yes	yes	2	2.2102e-28	134;135;136	R	E	I	L	R	A	0	1	0	2	0	0	1	0	0	2	1	0	3	0	0	0	0	0	0	2	0	0	638080000	1450700	2059500	3084100	72764000	35174000
A5AHP0	tr|A5AHP0|A5AHP0_VITVI	LNEAEIIEPLIPSVLQNLEHR	21	38	209.01	2426.32	VTLRFLCRLNEAEIIE	VLQNLEHRHPFIRRNA	123	143	yes	yes	3	5.5402e-196		R	L	N	H	R	H	1	1	2	0	0	1	4	0	1	3	4	0	0	0	2	1	0	0	0	1	0	0	947850000	6862000	7886300	1463200	200630000	45281000
A5AHP0	tr|A5AHP0|A5AHP0_VITVI	LPQGEQLLVDAPEMIEK	17	28	185.55	1908.99	LAVMSIYKLPQGEQLL	DAPEMIEKVLSTEQDP	161	177	yes	yes	2;3	1.1363e-106	137	K	L	P	E	K	V	1	0	0	1	0	2	3	1	0	1	3	1	1	0	2	0	0	0	0	1	0	0	257470000	0	0	0	30130000	26042000
A5AHP0	tr|A5AHP0|A5AHP0_VITVI	LVDRPQNYTLAPESSK	16	7	111.58	1816.93	LATMGDLKLVDRPQNY	TLAPESSKQIKANIKV	769	784	yes	yes	2;3	9.6282e-17		K	L	V	S	K	Q	1	1	1	1	0	1	1	0	0	0	2	1	0	0	2	2	1	0	1	1	0	1	119990000	5793200	6715100	3512200	31520000	23990000
A5AHP0	tr|A5AHP0|A5AHP0_VITVI	NAILAVMSIYK	11	12	86.911	1221.68	HRHPFIRRNAILAVMS	LAVMSIYKLPQGEQLL	150	160	yes	yes	2	0.00046715		R	N	A	Y	K	L	2	0	1	0	0	0	0	0	0	2	1	1	1	0	0	1	0	0	1	1	0	0	225120000	0	1593800	1285300	25260000	11256000
A5AHP0	tr|A5AHP0|A5AHP0_VITVI	NINEVVLTLK	10	26	91.701	1141.67	VLELITPRNINEVVLT	NEVVLTLKKEVVKTQS	348	357	yes	yes	2	0.00094642		R	N	I	L	K	K	0	0	2	0	0	0	1	0	0	1	2	1	0	0	0	0	1	0	0	2	0	0	228360000	2541300	3142700	2744000	26453000	32794000
A5AHP0	tr|A5AHP0|A5AHP0_VITVI	NINEVVLTLKK	11	2	48.115	1269.77	VLELITPRNINEVVLT	EVVLTLKKEVVKTQSG	348	358	yes	yes	3	0.0053902		R	N	I	K	K	E	0	0	2	0	0	0	1	0	0	1	2	2	0	0	0	0	1	0	0	2	0	1	8279500	0	0	0	0	0
A5AHP0	tr|A5AHP0|A5AHP0_VITVI	SVFGEDALVNISIEK	15	2	48.216	1619.84	LAANLYAKSVFGEDAL	LVNISIEKQADGKLSG	899	913	yes	yes	2	0.0052597		K	S	V	E	K	Q	1	0	1	1	0	0	2	1	0	2	1	1	0	1	0	2	0	0	0	2	0	0	6785200	0	0	0	0	3955800
A5AHP0	tr|A5AHP0|A5AHP0_VITVI	TLDIVLELITPR	12	3	92.295	1381.82	PNLDIRRKTLDIVLEL	VLELITPRNINEVVLT	336	347	yes	yes	2	9.6313e-05		K	T	L	P	R	N	0	1	0	1	0	0	1	0	0	2	3	0	0	0	1	0	2	0	0	1	0	0	10446000	0	0	0	3932100	2330500
A5AHP0	tr|A5AHP0|A5AHP0_VITVI	VAVNTVLQNEK	11	1	81.923	1213.67	AEFEWENKVAVNTVLQ	NTVLQNEKEFLEHIIK	853	863	yes	yes	2	0.00068193		K	V	A	E	K	E	1	0	2	0	0	1	1	0	0	0	1	1	0	0	0	0	1	0	0	3	0	0	12171000	0	0	0	0	9263800
A5AHP0	tr|A5AHP0|A5AHP0_VITVI	VSSTETGVIFGNIVYETSNVHER	23	12	130.81	2537.24	KQIKANIKVSSTETGV	ETSNVHERMVVVLNDI	792	814	yes	yes	3	1.2925e-63		K	V	S	E	R	M	0	1	2	0	0	0	3	2	1	2	0	0	0	1	0	3	3	0	1	4	0	0	128320000	4096300	4630500	4068200	46821000	22168000
A5AHP0	tr|A5AHP0|A5AHP0_VITVI	YVLPSEDHTVQK	12	35	151.13	1414.71	QLFITIVRYVLPSEDH	SEDHTVQKLLLLYLEI	61	72	yes	yes	2;3	4.267e-22		R	Y	V	Q	K	L	0	0	0	1	0	1	1	0	1	0	1	1	0	0	1	1	1	0	1	2	0	0	822000000	7750900	0	5416200	80547000	66247000
A5AHP0	tr|A5AHP0|A5AHP0_VITVI	LLDTFYQIR	9	39	160.56	1167.63	LRVSIITRLLDTFYQI	LDTFYQIRAARVCSCA	437	445	yes	no	2	1.2743e-14		R	L	L	I	R	A	0	1	0	1	0	1	0	0	0	1	2	0	0	1	0	0	1	0	1	0	0	0	1317900000	5567600	15743000	7987600	98388000	38838000
A5AHP0	tr|A5AHP0|A5AHP0_VITVI	NNLQHPNEYIR	11	49	220.5	1396.68	ILICQNLRNNLQHPNE	QHPNEYIRGVTLRFLC	103	113	yes	no	2;3	2.1419e-114		R	N	N	I	R	G	0	1	3	0	0	1	1	0	1	1	1	0	0	0	1	0	0	0	1	0	0	0	1517800000	10424000	10725000	11865000	143660000	155690000
A5AHY0	tr|A5AHY0|A5AHY0_VITVI	HPSPPLAPPPEHSSVGSK	18	18	138.66	1819.92	ITGVLEEKHPSPPLAP	EHSSVGSKIFPAFVKF	84	101	yes	yes	2;3;4	9.9832e-48		K	H	P	S	K	I	1	0	0	0	0	0	1	1	2	0	1	1	0	0	6	4	0	0	0	1	0	0	339770000	2849400	3580300	0	8101300	12855000
A5AHY0	tr|A5AHY0|A5AHY0_VITVI	IFPAFVK	7	4	67.035	820.485	EHSSVGSKIFPAFVKF	KIFPAFVKFLKSKDPN	102	108	yes	yes	2	0.047867		K	I	F	V	K	F	1	0	0	0	0	0	0	0	0	1	0	1	0	2	1	0	0	0	0	1	0	0	263770000	2710800	2335300	0	32409000	25688000
A5AHY0	tr|A5AHY0|A5AHY0_VITVI	LYHLQVALGHYK	12	7	65.348	1440.79	VDLSLAPKLYHLQVAL	QVALGHYKNWTIPESL	157	168	yes	yes	2;3;4	0.0011967		K	L	Y	Y	K	N	1	0	0	0	0	1	0	1	2	0	3	1	0	0	0	0	0	0	2	1	0	0	62514000	0	0	0	2620100	0
A5AHY0	tr|A5AHY0|A5AHY0_VITVI	NWTIPESLSHVHNYMK	16	14	127.57	1954.94	QVALGHYKNWTIPESL	SHVHNYMKLLFSRESF	169	184	yes	yes	3	4.8644e-30		K	N	W	M	K	L	0	0	2	0	0	0	1	0	2	1	1	1	1	0	1	2	1	1	1	1	0	0	41245000	0	0	0	0	0
A5AHY0	tr|A5AHY0|A5AHY0_VITVI	SKDPNDGSEQALLDELK	17	21	123.59	1857.9	PAFVKFLKSKDPNDGS	QALLDELKALDDHLKD	112	128	yes	yes	2;3	4.6765e-29		K	S	K	L	K	A	1	0	1	3	0	1	2	1	0	0	3	2	0	0	1	2	0	0	0	0	0	1	145630000	0	0	0	11408000	8033400
A5AHY0	tr|A5AHY0|A5AHY0_VITVI	TKPAPDHVVAGWAPK	15	0	45.54	1572.84	FSRESFEKTKPAPDHV	VVAGWAPKVNA_____	195	209	yes	yes	3	0.017842		K	T	K	P	K	V	3	0	0	1	0	0	0	1	1	0	0	2	0	0	3	0	1	1	0	2	0	1	40934000	0	0	0	0	7975900
A5AHY0	tr|A5AHY0|A5AHY0_VITVI	VDDKWVPDSDVITGVLEEK	19	5	49.528	2143.07	EGKVPVIKVDDKWVPD	ITGVLEEKHPSPPLAP	65	83	yes	yes	3	6.9624e-06		K	V	D	E	K	H	0	0	0	4	0	0	2	1	0	1	1	2	0	0	1	1	1	1	0	4	0	1	35412000	1762900	0	0	0	0
A5AIE0	tr|A5AIE0|A5AIE0_VITVI	AAITQQLPGESDKDYAEFSSK	21	2	61.16	2284.09	VTLFTRGKAAITQQLP	DYAEFSSKVLHLKGDR	88	108	yes	yes	3	6.0412e-07		K	A	A	S	K	V	3	0	0	2	0	2	2	1	0	1	1	2	0	1	1	3	1	0	1	0	0	1	40004000	0	0	0	10999000	8030100
A5AIE0	tr|A5AIE0|A5AIE0_VITVI	DQHFFASIEK	10	1	48.044	1220.58	KKKAFPFRDQHFFASI	HFFASIEKAKSVLGWK	319	328	yes	yes	3	0.0086307		R	D	Q	E	K	A	1	0	0	1	0	1	1	0	1	1	0	1	0	2	0	1	0	0	0	0	0	0	6460600	0	0	0	4299000	0
A5AIE0	tr|A5AIE0|A5AIE0_VITVI	EADFSTDDIILGK	13	2	45.654	1422.69	FGRGTFRKEADFSTDD	TDDIILGKSLVLT___	361	373	yes	yes	2	0.020227		K	E	A	G	K	S	1	0	0	3	0	0	1	1	0	2	1	1	0	1	0	1	1	0	0	0	0	0	12854000	946890	0	0	6968700	0
A5AIE0	tr|A5AIE0|A5AIE0_VITVI	EGHQVTLFTR	10	3	76.165	1186.61	FLARLLVKEGHQVTLF	HQVTLFTRGKAAITQQ	76	85	yes	yes	2	0.012644		K	E	G	T	R	G	0	1	0	0	0	1	1	1	1	0	1	0	0	1	0	0	2	0	0	1	0	0	13958000	0	0	0	7208700	6749000
A5AIE0	tr|A5AIE0|A5AIE0_VITVI	LETESLLDSR	10	10	78.342	1161.59	PKSRHKGKLETESLLD	TESLLDSRGVNWTSIR	191	200	yes	yes	2	0.0026809		K	L	E	S	R	G	0	1	0	1	0	0	2	0	0	0	3	0	0	0	0	2	1	0	0	0	0	0	79469000	0	0	0	17912000	12446000
A5AIE0	tr|A5AIE0|A5AIE0_VITVI	YVTFDGLAR	9	2	52.579	1040.53	VFNISGEKYVTFDGLA	VTFDGLARACAKGAGF	278	286	yes	yes	2	0.03186		K	Y	V	A	R	A	1	1	0	1	0	0	0	1	0	0	1	0	0	1	0	0	1	0	1	1	0	0	66873000	2075300	1929400	1196900	18234000	12641000
A5AIW6	tr|A5AIW6|A5AIW6_VITVI	EILSWLNDRF	10	3	80.916	1291.66	ENVDIVRREILSWLND	LSWLNDRF________	305	314	yes	yes	2	0.0035746		R	E	I	R	F	-	0	1	1	1	0	0	1	0	0	1	2	0	0	1	0	1	0	1	0	0	0	1	20385000	0	0	0	0	3902700
A5AIW6	tr|A5AIW6|A5AIW6_VITVI	FFPTLPIVPTPDILDK	16	34	123.02	1812.01	QILTFLARFFPTLPIV	PTPDILDKSVKVPEKK	187	202	yes	yes	2;3	1.7952e-22		R	F	F	D	K	S	0	0	0	2	0	0	0	0	0	2	2	1	0	2	4	0	2	0	0	1	0	0	386890000	1149700	1067300	0	51730000	32890000
A5AIW6	tr|A5AIW6|A5AIW6_VITVI	GLSLFTR	7	1	77.741	792.449	KSLFTSTRGLSLFTRS	RGLSLFTRSWQPLSTP	39	45	yes	yes	2	0.03108		R	G	L	T	R	S	0	1	0	0	0	0	0	1	0	0	2	0	0	1	0	1	1	0	0	0	0	0	58609000	0	0	0	0	0
A5AIW6	tr|A5AIW6|A5AIW6_VITVI	IIAAMNPLR	9	2	66.351	997.574	SVKVPEKKIIAAMNPL	IAAMNPLRYKGKPRLG	211	219	yes	yes	2	0.0095256		K	I	I	L	R	Y	2	1	1	0	0	0	0	0	0	2	1	0	1	0	1	0	0	0	0	0	0	0	30046000	0	0	0	6218300	3386400
A5AIW6	tr|A5AIW6|A5AIW6_VITVI	ITDYLSQK	8	1	58.433	966.502	GTVVELLRITDYLSQK	ITDYLSQKLGEVKLPF	235	242	yes	yes	2	0.038101		R	I	T	Q	K	L	0	0	0	1	0	1	0	0	0	1	1	1	0	0	0	1	1	0	1	0	0	0	55324000	0	0	0	0	18225000
A5AIW6	tr|A5AIW6|A5AIW6_VITVI	LGTVVELLR	9	26	114.5	998.612	LRYKGKPRLGTVVELL	GTVVELLRITDYLSQK	226	234	yes	yes	2	0.0002801		R	L	G	L	R	I	0	1	0	0	0	0	1	1	0	0	3	0	0	0	0	0	1	0	0	2	0	0	182090000	0	2556400	1428200	27405000	23282000
A5AIW6	tr|A5AIW6|A5AIW6_VITVI	LPFIVLHGSADAVTDPDVSR	20	2	53.453	2108.09	SQKLGEVKLPFIVLHG	VTDPDVSRALYEEAKS	248	267	yes	yes	2;3	0.00027729		K	L	P	S	R	A	2	1	0	3	0	0	0	1	1	1	2	0	0	1	2	2	1	0	0	3	0	0	101130000	0	0	0	14010000	22541000
A5AIW6	tr|A5AIW6|A5AIW6_VITVI	SLFTSTR	7	1	70.912	810.424	LQGIKSSKSLFTSTRG	KSLFTSTRGLSLFTRS	32	38	yes	yes	2	0.043517		K	S	L	T	R	G	0	1	0	0	0	0	0	0	0	0	1	0	0	1	0	2	2	0	0	0	0	0	54182000	8816800	7929900	4807700	0	0
A5AIW6	tr|A5AIW6|A5AIW6_VITVI	SWQPLSTPPR	10	1	54.486	1167.6	RGLSLFTRSWQPLSTP	QPLSTPPRALICMVHG	46	55	yes	yes	2	0.016889		R	S	W	P	R	A	0	1	0	0	0	1	0	0	0	0	1	0	0	0	3	2	1	1	0	0	0	0	15622000	0	0	0	0	0
A5AIW6	tr|A5AIW6|A5AIW6_VITVI	WPIPQILTFLAR	12	3	55.261	1453.84	ISDNVRPRWPIPQILT	QILTFLARFFPTLPIV	175	186	yes	yes	2	0.0048104		R	W	P	A	R	F	1	1	0	0	0	1	0	0	0	2	2	0	0	1	2	0	1	1	0	0	0	0	11095000	0	0	0	0	0
A5AJ83	tr|A5AJ83|A5AJ83_VITVI	VIDLFSSPDVVK	12	26	90.697	1317.72	FELRVHKRVIDLFSSP	FSSPDVVKQITSITIE	91	102	yes	yes	2	0.000112		R	V	I	V	K	Q	0	0	0	2	0	0	0	0	0	1	1	1	0	1	1	2	0	0	0	3	0	0	292170000	657430	6378900	5641700	44594000	27332000
A5AJY2	tr|A5AJY2|A5AJY2_VITVI	FLAGDEFTLADLSHLPNTQYLVSVTEK	27	2	60.472	3007.52	EQRLGESRFLAGDEFT	YLVSVTEKGEMFTKRK	159	185	yes	yes	3	1.1297e-11		R	F	L	E	K	G	2	0	1	2	0	1	2	1	1	0	5	1	0	2	1	2	3	0	1	2	0	0	13556000	0	0	0	0	0
A5AJY2	tr|A5AJY2|A5AJY2_VITVI	IQPFGQVPSFQDESISLFESR	21	2	31.488	2410.18	HKKPDYLKIQPFGQVP	SISLFESRAICRYVSE	50	70	yes	yes	3	0.0018138		K	I	Q	S	R	A	0	1	0	1	0	3	2	1	0	2	1	0	0	3	2	4	0	0	0	1	0	0	12462000	0	0	0	0	0
A5AKA8	tr|A5AKA8|A5AKA8_VITVI	QATINIGTIGHVAHGK	16	13	78.326	1615.88	LSPEVISRQATINIGT	IGHVAHGKSTVVKAIS	30	45	yes	yes	2;3;4	5.0401e-06		R	Q	A	G	K	S	2	0	1	0	0	1	0	3	2	3	0	1	0	0	0	0	2	0	0	1	0	0	150550000	0	0	0	28993000	12992000
A5AKA8	tr|A5AKA8|A5AKA8_VITVI	DFTSPPNMIVIR	12	22	92.112	1388.71	KKIPIPERDFTSPPNM	PPNMIVIRSFDVNKPG	241	252	yes	no	2	2.5825e-05	138	R	D	F	I	R	S	0	1	1	1	0	0	0	0	0	2	0	0	1	1	2	1	1	0	0	1	0	0	517240000	3204900	7453400	5867400	101210000	46654000
A5AKA8	tr|A5AKA8|A5AKA8_VITVI	FIQGTVADGAPVVPISAQLK	20	14	74.444	2010.12	NQHEAIQKFIQGTVAD	VPISAQLKYNIDVVCE	202	221	yes	no	2;3	5.6517e-09		K	F	I	L	K	Y	3	0	0	1	0	2	0	2	0	2	1	1	0	1	2	1	1	0	0	3	0	0	115370000	0	1638600	1480900	37659000	6123700
A5AKA8	tr|A5AKA8|A5AKA8_VITVI	GEILMLNIGSMSTGAR	16	3	78.95	1648.83	GKVSKLTKGEILMLNI	GSMSTGARVLAVRNDL	393	408	yes	no	2	0.00010588		K	G	E	A	R	V	1	1	1	0	0	0	1	3	0	2	2	0	2	0	0	2	1	0	0	0	0	0	18893000	0	1046000	0	0	7779400
A5AKA8	tr|A5AKA8|A5AKA8_VITVI	GGVAGGSILR	10	7	76.282	885.503	GFEVDEIRGGVAGGSI	VAGGSILRGVLKVNQF	268	277	yes	no	2	0.0030762		R	G	G	L	R	G	1	1	0	0	0	0	0	4	0	1	1	0	0	0	0	1	0	0	0	1	0	0	554070000	7565500	6291500	4149000	68385000	87808000
A5AKA8	tr|A5AKA8|A5AKA8_VITVI	IPIPERDFTSPPNMIVIR	18	4	38.777	2094.13	VCEYIVKKIPIPERDF	PPNMIVIRSFDVNKPG	235	252	yes	no	3	0.004561		K	I	P	I	R	S	0	2	1	1	0	0	1	0	0	4	0	0	1	1	4	1	1	0	0	1	0	1	41706000	0	0	0	11962000	0
A5AKA8	tr|A5AKA8|A5AKA8_VITVI	IVSLYAEQNELQFAVPGGLIGVGTTMDPTLTR	32	5	46.968	3389.75	KCTPIYSRIVSLYAEQ	TMDPTLTRADRLVGQV	310	341	yes	no	3	4.6284e-10		R	I	V	T	R	A	2	1	1	1	0	2	2	4	0	2	4	0	1	1	2	1	4	0	1	3	0	0	35593000	0	0	0	16056000	4781200
A5AKA8	tr|A5AKA8|A5AKA8_VITVI	LDVTTLHPLSPEVISR	16	3	80.361	1775.98	LMEQDLSKLDVTTLHP	LSPEVISRQATINIGT	14	29	yes	no	2;3	1.5599e-05		K	L	D	S	R	Q	0	1	0	1	0	0	1	0	1	1	3	0	0	0	2	2	2	0	0	2	0	0	120630000	0	0	0	16696000	10106000
A5AKA8	tr|A5AKA8|A5AKA8_VITVI	LQHIIILQNK	10	1	64.39	1218.74	LAAVEIMRLQHIIILQ	HIIILQNKVDLIQENV	174	183	yes	no	2;3	0.0028582		R	L	Q	N	K	V	0	0	1	0	0	2	0	0	1	3	2	1	0	0	0	0	0	0	0	0	0	0	96928000	2442200	0	0	18809000	24763000
A5AKA8	tr|A5AKA8|A5AKA8_VITVI	SFDVNKPGFEVDEIR	15	11	146.27	1750.85	PPNMIVIRSFDVNKPG	GFEVDEIRGGVAGGSI	253	267	yes	no	2;3	5.0198e-46		R	S	F	I	R	G	0	1	1	2	0	0	2	1	0	1	0	1	0	2	1	1	0	0	0	2	0	1	489900000	5186900	6099700	7608700	89033000	61295000
A5AKA8	tr|A5AKA8|A5AKA8_VITVI	VDLIQENVAINQHEAIQK	18	9	111.62	2061.09	HIIILQNKVDLIQENV	NQHEAIQKFIQGTVAD	184	201	yes	no	2;3	1.2396e-21		K	V	D	Q	K	F	2	0	2	1	0	3	2	0	1	3	1	1	0	0	0	0	0	0	0	2	0	0	94402000	0	978880	0	13828000	21091000
A5AKA8	tr|A5AKA8|A5AKA8_VITVI	VNQFIEVR	8	5	87.476	1003.55	SILRGVLKVNQFIEVR	VNQFIEVRPGIVVKDE	282	289	yes	no	2	0.0011032		K	V	N	V	R	P	0	1	1	0	0	1	1	0	0	1	0	0	0	1	0	0	0	0	0	2	0	0	27214000	0	0	0	6525800	9485400
A5AKA8	tr|A5AKA8|A5AKA8_VITVI	VNQFIEVRPGIVVK	14	23	120.92	1596.94	SILRGVLKVNQFIEVR	VRPGIVVKDENGNIKC	282	295	yes	no	2;3	1.7459e-15		K	V	N	V	K	D	0	1	1	0	0	1	1	1	0	2	0	1	0	1	1	0	0	0	0	4	0	1	183680000	803290	904970	0	25256000	30161000
A5AKD8	tr|A5AKD8|A5AKD8_VITVI	FADENFIHK	9	53	116.37	1119.53	GESIYGSKFADENFIH	ADENFIHKHTGPGILS	90	98	yes	yes	2;3	5.3905e-05		K	F	A	H	K	H	1	0	1	1	0	0	1	0	1	1	0	1	0	2	0	0	0	0	0	0	0	0	672780000	19505000	7598100	5119500	102810000	80710000
A5AKD8	tr|A5AKD8|A5AKD8_VITVI	IVMELFADTTPR	12	116	163.09	1391.71	VGGVPAGRIVMELFAD	LFADTTPRTAENFRAL	20	31	yes	yes	2;3	2.7133e-35	139	R	I	V	P	R	T	1	1	0	1	0	0	1	0	0	1	1	0	1	1	1	0	2	0	0	1	0	0	3923400000	67305000	82774000	90383000	744090000	589740000
A5AKD8	tr|A5AKD8|A5AKD8_VITVI	VFFDMSVGGVPAGR	14	83	188.09	1437.71	________________	VGGVPAGRIVMELFAD	6	19	yes	yes	2	1.4806e-89	140	K	V	F	G	R	I	1	1	0	1	0	0	0	3	0	0	0	0	1	2	1	1	0	0	0	3	0	0	621470000	8388000	19115000	10551000	132270000	89480000
A5AKD8	tr|A5AKD8|A5AKD8_VITVI	VIEGLDVVK	9	26	90.709	970.57	GKHVVFGKVIEGLDVV	IEGLDVVKAIEKVGSS	139	147	yes	yes	1;2	0.002778		K	V	I	V	K	A	0	0	0	1	0	0	1	1	0	1	1	1	0	0	0	0	0	0	0	3	0	0	1203200000	18623000	27619000	22526000	222270000	138160000
A5AKQ7	tr|A5AKQ7|A5AKQ7_VITVI	IGEYVDIK	8	4	76.605	935.496	TTYLRTFRIGEYVDIK	IGEYVDIKVNGAIHKG	36	43	yes	yes	2	0.0090876		R	I	G	I	K	V	0	0	0	1	0	0	1	1	0	2	0	1	0	0	0	0	0	0	1	1	0	0	147890000	0	3225100	2361100	19145000	20082000
A5AKQ7	tr|A5AKQ7|A5AKQ7_VITVI	AIGVEVNKQVGNR	13	3	84.169	1382.76	KVWNVTKRAIGVEVNK	VNKQVGNRIIKKRIHV	71	83	no	no	2	0.0017052		R	A	I	N	R	I	1	1	2	0	0	1	1	2	0	1	0	1	0	0	0	0	0	0	0	3	0	1	1128300	0	0	0	0	0
A5AKQ7	tr|A5AKQ7|A5AKQ7_VITVI	GYIPLTTYLR	10	14	68.847	1195.66	FARPFRKKGYIPLTTY	IPLTTYLRTFRIGEYV	23	32	yes	no	2	0.0062731		K	G	Y	L	R	T	0	1	0	0	0	0	0	1	0	1	2	0	0	0	1	0	2	0	2	0	0	0	139610000	174020	0	0	21367000	13758000
A5AKQ7	tr|A5AKQ7|A5AKQ7_VITVI	IHVRVEHVQPSR	12	1	34	1455.81	GNRIIKKRIHVRVEHV	VEHVQPSRCTEEFRLR	89	100	no	no	3	0.062166		R	I	H	S	R	C	0	2	0	0	0	1	1	0	2	1	0	0	0	0	1	1	0	0	0	3	0	1	448770	0	0	0	0	0
A5AKQ7	tr|A5AKQ7|A5AKQ7_VITVI	KGYIPLTTYLR	11	1	45.829	1323.76	LFARPFRKKGYIPLTT	IPLTTYLRTFRIGEYV	22	32	yes	no	3	0.0051423		K	K	G	L	R	T	0	1	0	0	0	0	0	1	0	1	2	1	0	0	1	0	2	0	2	0	0	1	0	0	0	0	0	0
A5AL04	tr|A5AL04|A5AL04_VITVI	DPSQQTAESALVIK	14	9	121.99	1485.77	IHVKRIARDPSQQTAE	AESALVIKGPQGRINR	130	143	yes	yes	2	1.2851e-16		R	D	P	I	K	G	2	0	0	1	0	2	1	0	0	1	1	1	0	0	1	2	1	0	0	1	0	0	41854000	0	0	0	4553400	2679800
A5AL04	tr|A5AL04|A5AL04_VITVI	LITGSADQTVK	11	1	77.597	1131.61	DVSRDSMRLITGSADQ	GSADQTVKLWNVETGA	67	77	yes	yes	2	0.0013212		R	L	I	V	K	L	1	0	0	1	0	1	0	1	0	1	1	1	0	0	0	1	2	0	0	1	0	0	67796000	0	0	2357500	16655000	15839000
A5AL04	tr|A5AL04|A5AL04_VITVI	TIISAGEDAIVR	12	16	98.105	1243.68	AIWGPLNRTIISAGED	AGEDAIVRIWDSETGK	160	171	yes	yes	2	4.3167e-05		R	T	I	V	R	I	2	1	0	1	0	0	1	1	0	3	0	0	0	0	0	1	1	0	0	1	0	0	150730000	3062000	2157800	2219000	20864000	16026000
A5ALB2	tr|A5ALB2|A5ALB2_VITVI	ASGITSIGVR	10	6	71.221	959.54	EYAFKAVKASGITSIG	GITSIGVRGKDSVCVV	34	43	yes	yes	2	0.011069		K	A	S	V	R	G	1	1	0	0	0	0	0	2	0	2	0	0	0	0	0	2	1	0	0	1	0	0	84633000	0	0	0	33560000	0
A5ALB2	tr|A5ALB2|A5ALB2_VITVI	EQEAINFLEK	10	2	44.612	1219.61	KATSAGLKEQEAINFL	EAINFLEKKMKNDPAF	172	181	yes	yes	2	0.062649		K	E	Q	E	K	K	1	0	1	0	0	1	3	0	0	1	1	1	0	1	0	0	0	0	0	0	0	0	59942000	1570000	1554700	1543000	17771000	0
A5ALB2	tr|A5ALB2|A5ALB2_VITVI	FLGLLATGMTADAR	14	32	96.464	1435.75	THLFPITKFLGLLATG	TGMTADARTLVQQARN	75	88	yes	yes	2	2.8535e-06	141	K	F	L	A	R	T	3	1	0	1	0	0	0	2	0	0	3	0	1	1	0	0	2	0	0	0	0	0	263030000	4028000	7279200	3805700	47557000	22913000
A5ALB2	tr|A5ALB2|A5ALB2_VITVI	HITIFSPEGR	10	9	125.74	1155.6	GSGGGYDRHITIFSPE	TIFSPEGRLFQVEYAF	12	21	yes	yes	2;3	1.4107e-14		R	H	I	G	R	L	0	1	0	0	0	0	1	1	1	2	0	0	0	1	1	1	1	0	0	0	0	0	232150000	4548000	5815100	3739700	62953000	0
A5ALB2	tr|A5ALB2|A5ALB2_VITVI	LFQVEYAFK	9	22	117.89	1143.6	TIFSPEGRLFQVEYAF	FQVEYAFKAVKASGIT	22	30	yes	yes	2	0.00023798		R	L	F	F	K	A	1	0	0	0	0	1	1	0	0	0	1	1	0	2	0	0	0	0	1	1	0	0	155690000	2391500	0	1493300	26572000	14387000
A5ALB2	tr|A5ALB2|A5ALB2_VITVI	LLDQTSVTHLFPITK	15	49	198.95	1711.95	TQKKVPDKLLDQTSVT	THLFPITKFLGLLATG	60	74	yes	yes	2;3	3.4591e-120		K	L	L	T	K	F	0	0	0	1	0	1	0	0	1	1	3	1	0	1	1	1	3	0	0	1	0	0	372380000	738590	3807400	2006100	78218000	23996000
A5ALB2	tr|A5ALB2|A5ALB2_VITVI	PLGVVAMILGIDDENGPR	18	1	44.391	1864.97	YTQHAYMRPLGVVAMI	IDDENGPRLFKCDPAG	133	150	yes	yes	3	0.00015122		R	P	L	P	R	L	1	1	1	2	0	0	1	3	0	2	2	0	1	0	2	0	0	0	0	2	0	0	0	0	0	0	0	0
A5ALB2	tr|A5ALB2|A5ALB2_VITVI	VLSTEEIDEHLTAISERD	18	2	100.04	2056	RTDSPAFRVLSTEEID	LTAISERD________	229	246	yes	yes	2;3	2.2542e-17		R	V	L	R	D	-	1	1	0	2	0	0	4	0	1	2	2	0	0	0	0	2	2	0	0	1	0	1	52872000	1876500	0	0	19319000	12636000
A5ALB2	tr|A5ALB2|A5ALB2_VITVI	YGYEMPVDVLAR	12	29	131.17	1411.68	EAAEFRFRYGYEMPVD	MPVDVLARWIADKSQV	105	116	yes	yes	2	1.8363e-13	142	R	Y	G	A	R	W	1	1	0	1	0	0	1	1	0	0	1	0	1	0	1	0	0	0	2	2	0	0	713680000	2648000	6630300	8495500	132210000	94295000
A5ALF3	tr|A5ALF3|A5ALF3_VITVI	GQQITLAYLIPPTYQGHK	18	6	73.918	2027.08	LDTYATYRGQQITLAY	PPTYQGHKEIITWSPF	98	115	yes	yes	2;3	5.5053e-07		R	G	Q	H	K	E	1	0	0	0	0	3	0	2	1	2	2	1	0	0	2	0	2	0	2	0	0	0	169760000	1568500	3989700	6308600	26234000	3512400
A5ALF3	tr|A5ALF3|A5ALF3_VITVI	LDTYATYR	8	14	87.639	1001.48	KIGIYYEKLDTYATYR	LDTYATYRGQQITLAY	90	97	yes	yes	2	0.0067783		K	L	D	Y	R	G	1	1	0	1	0	0	0	0	0	0	1	0	0	0	0	0	2	0	2	0	0	0	330230000	14377000	14857000	9751100	23579000	21029000
A5ALF3	tr|A5ALF3|A5ALF3_VITVI	SSGVVIGNAVK	11	6	75.566	1029.58	APITFGARSSGVVIGN	VVIGNAVKYQMASTCS	186	196	yes	yes	2	0.0016214		R	S	S	V	K	Y	1	0	1	0	0	0	0	2	0	1	0	1	0	0	0	2	0	0	0	3	0	0	381070000	2793000	2779400	0	22740000	19268000
A5ALT5	tr|A5ALT5|A5ALT5_VITVI	SNPGEVVKPDQFK	13	3	84.297	1443.74	DGRQLLIKSNPGEVVK	VVKPDQFKAINDEGMP	303	315	yes	yes	2;3	0.0034624		K	S	N	F	K	A	0	0	1	1	0	1	1	1	0	0	0	2	0	1	2	1	0	0	0	2	0	1	96738000	0	0	0	5091800	0
A5ALT5	tr|A5ALT5|A5ALT5_VITVI	VSLEDLYIGTSK	12	3	88.101	1323.69	EDVVHPLKVSLEDLYI	DLYIGTSKKLSLSRNV	127	138	yes	yes	2	0.00014644		K	V	S	S	K	K	0	0	0	1	0	0	1	1	0	1	2	1	0	0	0	2	1	0	1	1	0	0	15571000	0	0	0	0	0
A5ALT5	tr|A5ALT5|A5ALT5_VITVI	VTFPGEADEAPDTVTGDIVFVLQQK	25	1	38.669	2675.33	KGMQNGQKVTFPGEAD	IVFVLQQKEHPKFKRK	236	260	yes	yes	3	0.00021659		K	V	T	Q	K	E	2	0	0	3	0	2	2	2	0	1	1	1	0	2	2	0	3	0	0	4	0	0	8214900	0	0	0	0	0
A5AML5	tr|A5AML5|A5AML5_VITVI	KMPNVIFLK	9	22	98.233	1088.64	PFLAELAKKMPNVIFL	MPNVIFLKVDVDELET	55	63	yes	no	2;3	0.0016237	143	K	K	M	L	K	V	0	0	1	0	0	0	0	0	0	1	1	2	1	1	1	0	0	0	0	1	0	1	314670000	0	0	767520	23428000	14355000
A5AML5	tr|A5AML5|A5AML5_VITVI	MPNVIFLK	8	41	122.74	960.547	FLAELAKKMPNVIFLK	MPNVIFLKVDVDELET	56	63	yes	no	2	0.0017097	143	K	M	P	L	K	V	0	0	1	0	0	0	0	0	0	1	1	1	1	1	1	0	0	0	0	1	0	0	439740000	6442000	8568800	7010100	18313000	15112000
A5AML5	tr|A5AML5|A5AML5_VITVI	VDVDELETVAK	11	11	127.87	1216.62	MPNVIFLKVDVDELET	DELETVAKEWEVEAMP	64	74	yes	no	2	4.2484e-12		K	V	D	A	K	E	1	0	0	2	0	0	2	0	0	0	1	1	0	0	0	0	1	0	0	3	0	0	860780000	18964000	15216000	11507000	201750000	0
A5AML5	tr|A5AML5|A5AML5_VITVI	VISPFLAELAK	11	43	84.479	1186.7	ASWCGPCRVISPFLAE	PFLAELAKKMPNVIFL	44	54	yes	no	2	0.00055663		R	V	I	A	K	K	2	0	0	0	0	0	1	0	0	1	2	1	0	1	1	1	0	0	0	1	0	0	1224100000	16321000	24918000	19367000	134970000	3928900
A5AML5	tr|A5AML5|A5AML5_VITVI	VISPFLAELAKK	12	7	56.956	1314.79	ASWCGPCRVISPFLAE	FLAELAKKMPNVIFLK	44	55	yes	no	3	0.00072792		R	V	I	K	K	M	2	0	0	0	0	0	1	0	0	1	2	2	0	1	1	1	0	0	0	1	0	1	27401000	0	0	0	3874200	3849100
A5AND9	tr|A5AND9|A5AND9_VITVI	NMVEISGDDEAHAPK	15	1	62.813	1611.72	ALMKHSQKNMVEISGD	DDEAHAPKGLGRFVCC	122	136	yes	yes	3	0.0011609	144	K	N	M	P	K	G	2	0	1	2	0	0	2	1	1	1	0	1	1	0	1	1	0	0	0	1	0	0	9689900	0	0	0	4140900	5549100
A5ANX3	tr|A5ANX3|A5ANX3_VITVI	ATVGGIHDSDGSQNALEIENLAR	23	113	392.4	2366.15	________________	LEIENLARFAVDEHNK	2	24	yes	yes	2;3	0		M	A	T	A	R	F	3	1	2	2	0	1	2	3	1	2	2	0	0	0	0	2	1	0	0	1	0	0	8725500000	48147000	96307000	67476000	120230000	42788000
A5ANX3	tr|A5ANX3|A5ANX3_VITVI	ELQEFKPIGDEPATASA	17	14	199.33	1801.87	VKPWLNFKELQEFKPI	DEPATASA________	85	101	yes	yes	2	3.8638e-136		K	E	L	S	A	-	3	0	0	1	0	1	3	1	0	1	1	1	0	1	2	1	1	0	0	0	0	1	166250000	2081900	3671900	0	8765300	9465600
A5ANX3	tr|A5ANX3|A5ANX3_VITVI	FAVDEHNK	8	3	94.114	958.451	LEIENLARFAVDEHNK	FAVDEHNKKQNTLLEF	25	32	yes	yes	2	0.0054384		R	F	A	N	K	K	1	0	1	1	0	0	1	0	1	0	0	1	0	1	0	0	0	0	0	1	0	0	2724500	0	0	0	0	0
A5ANX3	tr|A5ANX3|A5ANX3_VITVI	FAVDEHNKK	9	5	126.07	1086.55	LEIENLARFAVDEHNK	AVDEHNKKQNTLLEFN	25	33	yes	yes	2;3	0.00025153		R	F	A	K	K	Q	1	0	1	1	0	0	1	0	1	0	0	2	0	1	0	0	0	0	0	1	0	1	6992000	0	0	0	0	0
A5ANX3	tr|A5ANX3|A5ANX3_VITVI	FAVDEHNKKQNTLLEFNGVVK	21	7	172.24	2429.27	LEIENLARFAVDEHNK	LEFNGVVKVRQQVVAG	25	45	yes	yes	3;4	2.0814e-124		R	F	A	V	K	V	1	0	3	1	0	1	2	1	1	0	2	3	0	2	0	0	1	0	0	3	0	2	126860000	0	0	0	0	0
A5ANX3	tr|A5ANX3|A5ANX3_VITVI	IWVKPWLNFK	10	8	155.84	1329.76	KKNKYEAKIWVKPWLN	VKPWLNFKELQEFKPI	75	84	yes	yes	2;3	2.2365e-18		K	I	W	F	K	E	0	0	1	0	0	0	0	0	0	1	1	2	0	1	1	0	0	2	0	1	0	1	311920000	0	0	0	12355000	0
A5ANX3	tr|A5ANX3|A5ANX3_VITVI	KQNTLLEFNGVVK	13	25	172.33	1488.83	FAVDEHNKKQNTLLEF	LEFNGVVKVRQQVVAG	33	45	yes	yes	2;3	8.3388e-54		K	K	Q	V	K	V	0	0	2	0	0	1	1	1	0	0	2	2	0	1	0	0	1	0	0	2	0	1	348800000	2348300	5288900	2176600	3594300	3788400
A5ANX3	tr|A5ANX3|A5ANX3_VITVI	QNTLLEFNGVVK	12	30	206.69	1360.74	AVDEHNKKQNTLLEFN	LEFNGVVKVRQQVVAG	34	45	yes	yes	2	7.7868e-97		K	Q	N	V	K	V	0	0	2	0	0	1	1	1	0	0	2	1	0	1	0	0	1	0	0	2	0	0	767130000	5878700	6489700	7397700	10738000	8065800
A5ANX3	tr|A5ANX3|A5ANX3_VITVI	QQVVAGTIYYITLDATDGGK	20	51	144.33	2112.07	FNGVVKVRQQVVAGTI	LDATDGGKKNKYEAKI	48	67	yes	yes	2;3	1.5212e-69		R	Q	Q	G	K	K	2	0	0	2	0	2	0	3	0	2	1	1	0	0	0	0	3	0	2	2	0	0	339180000	2211700	2657700	3277200	3529100	0
A5ANX3	tr|A5ANX3|A5ANX3_VITVI	QQVVAGTIYYITLDATDGGKK	21	3	113.51	2240.17	FNGVVKVRQQVVAGTI	DATDGGKKNKYEAKIW	48	68	yes	yes	2;3	7.5983e-34		R	Q	Q	K	K	N	2	0	0	2	0	2	0	3	0	2	1	2	0	0	0	0	3	0	2	2	0	1	157690000	2214500	2442500	1381000	0	0
A5ANX3	tr|A5ANX3|A5ANX3_VITVI	VRQQVVAGTIYYITLDATDGGK	22	13	105.06	2367.24	LEFNGVVKVRQQVVAG	LDATDGGKKNKYEAKI	46	67	yes	yes	3	1.8368e-26		K	V	R	G	K	K	2	1	0	2	0	2	0	3	0	2	1	1	0	0	0	0	3	0	2	3	0	1	48645000	0	2360000	0	0	0
A5ANX3	tr|A5ANX3|A5ANX3_VITVI	VRQQVVAGTIYYITLDATDGGKK	23	1	27.203	2495.34	LEFNGVVKVRQQVVAG	DATDGGKKNKYEAKIW	46	68	yes	yes	3	0.042222		K	V	R	K	K	N	2	1	0	2	0	2	0	3	0	2	1	2	0	0	0	0	3	0	2	3	0	2	11713000	0	0	0	0	0
A5AP38	tr|A5AP38|A5AP38_VITVI	IIAEYIWIGGSGNDLR	16	2	71.08	1775.92	NLSDSTEKIIAEYIWI	GGSGNDLRSKARTLSG	19	34	yes	yes	2	2.1321e-05		K	I	I	L	R	S	1	1	1	1	0	0	1	3	0	4	1	0	0	0	0	1	0	1	1	0	0	0	63090000	0	0	0	12764000	9936800
A5AP38	tr|A5AP38|A5AP38_VITVI	ITEIAGVVVSFDPKPIK	17	7	72.433	1812.04	VARYILERITEIAGVV	SFDPKPIKGDWNGAGA	224	240	yes	yes	2;3	1.5871e-05		R	I	T	I	K	G	1	0	0	1	0	0	1	1	0	3	0	2	0	1	2	1	1	0	0	3	0	1	57331000	0	0	1449800	14272000	4434400
A5AP38	tr|A5AP38|A5AP38_VITVI	SLLADLQNINLSDSTEK	17	6	125.73	1859.95	________________	NLSDSTEKIIAEYIWI	2	18	yes	yes	2	2.1105e-30		M	S	L	E	K	I	1	0	2	2	0	1	1	0	0	1	4	1	0	0	0	3	1	0	0	0	0	0	37475000	0	0	0	8695100	6538300
A5AP38	tr|A5AP38|A5AP38_VITVI	TLSGPVTGPAQLPK	14	1	67.234	1364.77	NDLRSKARTLSGPVTG	TGPAQLPKWNYDGSST	39	52	yes	yes	2	0.0013856		R	T	L	P	K	W	1	0	0	0	0	1	0	2	0	0	2	1	0	0	3	1	2	0	0	1	0	0	81542000	0	2227000	1992600	14905000	11288000
A5APR3	tr|A5APR3|A5APR3_VITVI	ASSYQQTSAPSSSPGLGIR	19	3	39.387	1892.92	GAVPPPGRASSYQQTS	SSPGLGIRVVIKPEFR	58	76	yes	yes	2	0.0059952		R	A	S	I	R	V	2	1	0	0	0	2	0	2	0	1	1	0	0	0	2	6	1	0	1	0	0	0	14153000	0	0	809870	4383000	3458500
A5APR3	tr|A5APR3|A5APR3_VITVI	ISPPPQLSPQVGEIPR	16	3	36.127	1713.94	VVIKPEFRISPPPQLS	PQVGEIPRSTFQFDFD	85	100	yes	yes	3	0.0044247		R	I	S	P	R	S	0	1	0	0	0	2	1	1	0	2	1	0	0	0	5	2	0	0	0	1	0	0	10306000	0	0	0	0	0
A5AQ16	tr|A5AQ16|A5AQ16_VITVI	NHIFTSGASGTNAAVIR	17	3	62.709	1714.88	SYAMVITKNHIFTSGA	GTNAAVIRGALRAEKP	101	117	yes	yes	2;3	0.000253		K	N	H	I	R	G	3	1	2	0	0	0	0	2	1	2	0	0	0	1	0	2	2	0	0	1	0	0	35654000	0	1263000	0	13752000	10371000
A5AQ16	tr|A5AQ16|A5AQ16_VITVI	NVIEKPYNDHLPLIEASR	18	1	39.923	2107.11	QELLSKVKNVIEKPYN	LPLIEASRLCNMDIIS	152	169	yes	yes	3	0.0013482		K	N	V	S	R	L	1	1	2	1	0	0	2	0	1	2	2	1	0	0	2	1	0	0	1	1	0	1	0	0	0	0	0	0
A5AQ16	tr|A5AQ16|A5AQ16_VITVI	AEKPELLTVILPQSLK	16	1	50.819	1778.06	AVIRGALRAEKPELLT	VILPQSLKMQPPESQE	122	137	yes	no	3	0.002363		R	A	E	L	K	M	1	0	0	0	0	1	2	0	0	1	4	2	0	0	2	1	1	0	0	1	0	1	27585000	0	0	0	12473000	0
A5AQ16	tr|A5AQ16|A5AQ16_VITVI	AIGFFGTR	8	1	84.498	867.46	AIQQQGPRAIGFFGTR	AIGFFGTRNMGFTHQE	72	79	yes	no	2	0.0070557		R	A	I	T	R	N	1	1	0	0	0	0	0	2	0	1	0	0	0	2	0	0	1	0	0	0	0	0	15648000	4068900	0	3109800	0	8469200
A5AQ64	tr|A5AQ64|A5AQ64_VITVI	KWVIHVER	8	4	70.747	1065.61	KVVQVYRRKWVIHVER	KWVIHVERITREKVNG	76	83	yes	yes	3	0.0024838		R	K	W	E	R	I	0	1	0	0	0	0	1	0	1	1	0	1	0	0	0	0	0	1	0	2	0	1	34722000	0	0	0	2760900	2946500
A5AQ64	tr|A5AQ64|A5AQ64_VITVI	SMPIRKDDEVQVVR	14	4	70.889	1670.88	LRSKYNARSMPIRKDD	DDEVQVVRGTFKGREG	46	59	yes	yes	3	0.002099	148	R	S	M	V	R	G	0	2	0	2	0	1	1	0	0	1	0	1	1	0	1	1	0	0	0	3	0	2	18587000	0	0	0	0	0
A5AQ64	tr|F6HSQ0|F6HSQ0_VITVI	DDEVQVVR	8	2	64.734	958.472	ARSMPIRKDDEVQVVR	DDEVQVVRGTFKGREG	52	59	no	no	2	0.020475		K	D	D	V	R	G	0	1	0	2	0	1	1	0	0	0	0	0	0	0	0	0	0	0	0	3	0	0	6609800	2324100	2510600	0	0	0
A5AQ64	tr|F6HSQ0|F6HSQ0_VITVI	RVLMSAPLSTDLR	13	1	44.246	1457.8	FTAPSSVRRVLMSAPL	APLSTDLRSKYNARSM	27	39	no	no	3	0.0047319		R	R	V	L	R	S	1	2	0	1	0	0	0	0	0	0	3	0	1	0	1	2	1	0	0	1	0	1	13804000	0	0	0	0	0
A5AQ64	tr|F6HSQ0|F6HSQ0_VITVI	VLMSAPLSTDLR	12	39	140.24	1301.7	TAPSSVRRVLMSAPLS	APLSTDLRSKYNARSM	28	39	no	no	2	3.3258e-17	149	R	V	L	L	R	S	1	1	0	1	0	0	0	0	0	0	3	0	1	0	1	2	1	0	0	1	0	0	742310000	5846900	5146100	4529700	47240000	32971000
A5AQ65	tr|A5AQ65|A5AQ65_VITVI	ASYVHHLDSLK	11	35	212.09	1268.65	GDKGDTIRASYVHHLD	VHHLDSLKKSAAVGEI	184	194	yes	yes	2;3	1.8802e-96		R	A	S	L	K	K	1	0	0	1	0	0	0	0	2	0	2	1	0	0	0	2	0	0	1	1	0	0	1498800000	0	21742000	12288000	113340000	153340000
A5AQ65	tr|A5AQ65|A5AQ65_VITVI	ASYVHHLDSLKK	12	7	102.97	1396.75	GDKGDTIRASYVHHLD	HHLDSLKKSAAVGEIS	184	195	yes	yes	3;4	3.3482e-06		R	A	S	K	K	S	1	0	0	1	0	0	0	0	2	0	2	2	0	0	0	2	0	0	1	1	0	1	49294000	7476900	5694700	5333500	695870	0
A5AQ65	tr|A5AQ65|A5AQ65_VITVI	FGLALALKP	9	17	82.452	928.575	KALDKTPRFGLALALK	GLALALKP________	268	276	yes	yes	1;2	0.011244		R	F	G	K	P	-	2	0	0	0	0	0	0	1	0	0	3	1	0	1	1	0	0	0	0	0	0	1	193040000	616270	1300100	1333000	16088000	31891000
A5AQ65	tr|A5AQ65|A5AQ65_VITVI	FSTNDNTFTVGGSYAIDPLTNVK	23	42	157.53	2460.18	AVGEISRRFSTNDNTF	IDPLTNVKAKLNNHGN	206	228	yes	yes	2;3	1.4905e-109		R	F	S	V	K	A	1	0	3	2	0	0	0	2	0	1	1	1	0	2	1	2	4	0	1	2	0	0	1059800000	9689200	5369000	8325000	124820000	145480000
A5AQ65	tr|A5AQ65|A5AQ65_VITVI	LNNHGNLGALLQHEIIPK	18	58	186.45	1980.09	PLTNVKAKLNNHGNLG	LQHEIIPKSILTLSGE	231	248	yes	yes	2;3;4	3.388e-108		K	L	N	P	K	S	1	0	3	0	0	1	1	2	2	2	4	1	0	0	1	0	0	0	0	0	0	0	908930000	0	3665900	0	66456000	60143000
A5AQ65	tr|A5AQ65|A5AQ65_VITVI	RFSTNDNTFTVGGSYAIDPLTNVK	24	23	128.01	2616.28	AAVGEISRRFSTNDNT	IDPLTNVKAKLNNHGN	205	228	yes	yes	3	1.1328e-63		R	R	F	V	K	A	1	1	3	2	0	0	0	2	0	1	1	1	0	2	1	2	4	0	1	2	0	1	324490000	0	0	0	43838000	11056000
A5AQ65	tr|A5AQ65|A5AQ65_VITVI	SILTLSGEFDTK	12	42	127.56	1309.68	LQHEIIPKSILTLSGE	LSGEFDTKALDKTPRF	249	260	yes	yes	2	3.7111e-13		K	S	I	T	K	A	0	0	0	1	0	0	1	1	0	1	2	1	0	1	0	2	2	0	0	0	0	0	605980000	5872300	9242900	6405600	76296000	43629000
A5AQ65	tr|A5AQ65|A5AQ65_VITVI	ADTGSNINTTLTFTEIIPSTK	21	34	214.42	2223.13	KNSVIDVKADTGSNIN	TEIIPSTKTIASFKFP	71	91	yes	no	2;3	2.8834e-216		K	A	D	T	K	T	1	0	2	1	0	0	1	1	0	3	1	1	0	1	1	2	6	0	0	0	0	0	481140000	10472000	4631700	3191000	34696000	69159000
A5AQ65	tr|A5AQ65|A5AQ65_VITVI	GGLSTGDVAVQYK	13	29	136.38	1293.66	ITSTAVKKGGLSTGDV	GDVAVQYKYKNSVIDV	49	61	yes	no	2	1.979e-22		K	G	G	Y	K	Y	1	0	0	1	0	1	0	3	0	0	1	1	0	0	0	1	1	0	1	2	0	0	378590000	2881100	3031000	4076800	47022000	39799000
A5AQ65	tr|A5AQ65|A5AQ65_VITVI	GPGLFADIGK	10	16	91.095	973.523	________________	GLFADIGKKAKDLLTR	4	13	yes	no	2	0.0010002		K	G	P	G	K	K	1	0	0	1	0	0	0	3	0	1	1	1	0	1	1	0	0	0	0	0	0	0	239030000	1941600	2187700	1877000	32992000	46595000
A5AQ65	tr|A5AQ65|A5AQ65_VITVI	GPGLFADIGKK	11	13	73.951	1101.62	________________	LFADIGKKAKDLLTRD	4	14	yes	no	2;3	0.004627		K	G	P	K	K	A	1	0	0	1	0	0	0	3	0	1	1	2	0	1	1	0	0	0	0	0	0	1	110560000	0	0	0	24898000	17289000
A5AQ65	tr|A5AQ65|A5AQ65_VITVI	KGGLSTGDVAVQYK	14	17	178.22	1421.75	AITSTAVKKGGLSTGD	GDVAVQYKYKNSVIDV	48	61	yes	no	2;3	1.2455e-65		K	K	G	Y	K	Y	1	0	0	1	0	1	0	3	0	0	1	2	0	0	0	1	1	0	1	2	0	1	238380000	3230700	0	0	31320000	18704000
A5AQ89	tr|A5AQ89|A5AQ89_VITVI	LGDYLIDQGL	10	51	140.88	1105.57	QCNMIVERLGDYLIDQ	DYLIDQGL________	122	131	yes	yes	1;2	1.2032e-34		R	L	G	G	L	-	0	0	0	2	0	1	0	2	0	1	3	0	0	0	0	0	0	0	1	0	0	0	2242200000	27972000	24903000	18993000	260500000	224620000
A5AQ89	tr|A5AQ89|A5AQ89_VITVI	YMVIQGEPGAVIR	13	49	162.49	1431.75	GLYLGGTKYMVIQGEP	GEPGAVIRGKKGSGGA	72	84	no	no	2	8.7532e-44	150	K	Y	M	I	R	G	1	1	0	0	0	1	1	2	0	2	0	0	1	0	1	0	0	0	1	2	0	0	5864800000	1468000000	7526800	1404800000	1305200000	971570000
A5AQF8	tr|A5AQF8|A5AQF8_VITVI	LLDLFDSEDQR	11	12	64.64	1349.65	VDHSFVLRLLDLFDSE	LFDSEDQREREYLKTI	245	255	yes	yes	2	0.0046215		R	L	L	Q	R	E	0	1	0	3	0	1	1	0	0	0	3	0	0	1	0	1	0	0	0	0	0	0	31096000	0	0	0	4152700	2496000
A5AQF8	tr|A5AQF8|A5AQF8_VITVI	YVDHSFVLR	9	2	52.255	1134.58	TDAKLAKRYVDHSFVL	VDHSFVLRLLDLFDSE	236	244	yes	yes	2	0.039614		R	Y	V	L	R	L	0	1	0	1	0	0	0	0	1	0	1	0	0	1	0	1	0	0	1	2	0	0	26748000	0	0	0	4864400	0
A5AR17	tr|A5AR17|A5AR17_VITVI	AVQAQEGIAALR	12	0	57.175	1225.68	FSFEGRRRAVQAQEGI	QEGIAALRDSVDTLIV	261	272	yes	yes	2	0.015695		R	A	V	L	R	D	4	1	0	0	0	2	1	1	0	1	1	0	0	0	0	0	0	0	0	1	0	0	771340	771340	0	0	0	0
A5AR17	tr|A5AR17|A5AR17_VITVI	DAALNAIQSPLLDIGIER	18	1	79.676	1908.03	ATGKTRARDAALNAIQ	LLDIGIERATGIVWNI	356	373	yes	yes	2	9.2353e-07		R	D	A	E	R	A	3	1	1	2	0	1	1	1	0	3	3	0	0	0	1	1	0	0	0	0	0	0	11666000	598710	0	0	4623200	6444000
A5AR53	tr|A5AR53|A5AR53_VITVI	GVVLHSPILSGLR	13	0	44.511	1346.8	ASRVSNLRGVVLHSPI	SPILSGLRVLYPVKRT	166	178	yes	yes	3	0.0080971		R	G	V	L	R	V	0	1	0	0	0	0	0	2	1	1	3	0	0	0	1	2	0	0	0	2	0	0	7426100	0	0	0	0	0
A5AR53	tr|A5AR53|A5AR53_VITVI	LYIPEVPR	8	5	71.379	985.56	ADESCGGRLYIPEVPR	LYIPEVPRRDDVDVLK	34	41	yes	yes	2	0.012569		R	L	Y	P	R	R	0	1	0	0	0	0	1	0	0	1	1	0	0	0	2	0	0	0	1	1	0	0	21060000	0	0	0	0	0
A5AR55	tr|A5AR55|A5AR55_VITVI	AVSEEDGQGLAER	13	3	79.875	1359.63	KCDLKHLRAVSEEDGQ	DGQGLAEREELSFLET	134	146	yes	yes	2	0.00058863		R	A	V	E	R	E	2	1	0	1	0	1	3	2	0	0	1	0	0	0	0	1	0	0	0	1	0	0	32699000	0	0	0	9934500	18122000
A5AR55	tr|A5AR55|A5AR55_VITVI	GAVGALLVYDITK	13	6	65.043	1318.75	AITSAYYRGAVGALLV	LLVYDITKRQTFDNVQ	84	96	yes	no	2	0.0017784		R	G	A	T	K	R	2	0	0	1	0	0	0	2	0	1	2	1	0	0	0	0	1	0	1	2	0	0	21157000	0	487940	0	0	2469800
A5ARC5	tr|A5ARC5|A5ARC5_VITVI	LVEFLGR	7	2	81.297	832.481	IQSGVVPRLVEFLGRD	RLVEFLGRDDFPQLQF	120	126	yes	yes	2	0.023129		R	L	V	G	R	D	0	1	0	0	0	0	1	1	0	0	2	0	0	1	0	0	0	0	0	1	0	0	12606000	0	0	0	7355700	0
A5ARC5	tr|A5ARC5|A5ARC5_VITVI	SPPINEVIQSGVVPR	15	12	106.82	1590.87	RKLLSIERSPPINEVI	IQSGVVPRLVEFLGRD	105	119	yes	yes	2;3	2.697e-11		R	S	P	P	R	L	0	1	1	0	0	1	1	1	0	2	0	0	0	0	3	2	0	0	0	3	0	0	84501000	1373900	2816300	2981000	21313000	17245000
A5ARC5	tr|D7SY66|D7SY66_VITVI	VVIDHGAVPIFVK	13	3	50.088	1392.81	SGTSENTKVVIDHGAV	GAVPIFVKLLGSPSDD	153	165	no	no	2;3	0.0023737		K	V	V	V	K	L	1	0	0	1	0	0	0	1	1	2	0	1	0	1	1	0	0	0	0	4	0	0	40533000	445590	0	0	9297000	17429000
A5ARC5	tr|A5ARC5|A5ARC5_VITVI	RREDNLVEIR	10	1	60.255	1298.71	VDAEEGRRRREDNLVE	EDNLVEIRKNKREESL	28	37	yes	no	3	0.037886		R	R	R	I	R	K	0	3	1	1	0	0	2	0	0	1	1	0	0	0	0	0	0	0	0	1	0	2	0	0	0	0	0	0
A5ARE0	tr|A5ARE0|A5ARE0_VITVI	AGSLFIVPR	9	33	130.75	958.56	RVLETTLKAGSLFIVP	GSLFIVPRFFVVSKIG	275	283	yes	yes	2	4.6956e-05		K	A	G	P	R	F	1	1	0	0	0	0	0	1	0	1	1	0	0	1	1	1	0	0	0	1	0	0	954490000	10635000	8872400	6637100	117620000	140690000
A5ARE0	tr|A5ARE0|A5ARE0_VITVI	AWDLEEDVVK	10	2	62.466	1202.58	FSTEFVSRAWDLEEDV	DLEEDVVKSLVGKQSG	148	157	yes	yes	2	0.011234		R	A	W	V	K	S	1	0	0	2	0	0	2	0	0	0	1	1	0	0	0	0	0	1	0	2	0	0	232010000	0	2590600	0	55748000	33278000
A5ARE0	tr|A5ARE0|A5ARE0_VITVI	IGDPEGMDWFSIITTPNPIFTHLAGR	26	40	186.82	2884.42	PRFFVVSKIGDPEGMD	IFTHLAGRTSAWKALS	290	315	yes	yes	3	5.2222e-183	151	K	I	G	G	R	T	1	1	1	2	0	0	1	3	1	4	1	0	1	2	3	1	3	1	0	0	0	0	695510000	3563500	3230400	990700	52103000	62462000
A5ARE0	tr|A5ARE0|A5ARE0_VITVI	IILHQHGFALPSYSDSSK	18	0	44.468	1999.02	EGNIGAAKIILHQHGF	PSYSDSSKVAYVLQGN	42	59	yes	yes	3	0.0029973		K	I	I	S	K	V	1	0	0	1	0	1	0	1	2	2	2	1	0	1	1	4	0	0	1	0	0	0	27080000	0	0	0	10186000	0
A5ARE0	tr|A5ARE0|A5ARE0_VITVI	LEGTFEMPEPK	11	11	62.705	1276.6	QSGKGIVKLEGTFEMP	TFEMPEPKKEHRNGLV	171	181	yes	yes	2	0.0027713	152	K	L	E	P	K	K	0	0	0	0	0	0	3	1	0	0	1	1	1	1	2	0	1	0	0	0	0	0	68718000	1261600	1081400	1188800	0	9198800
A5ARE0	tr|A5ARE0|A5ARE0_VITVI	MEIDLTPK	8	3	48.423	945.484	________________	MEIDLTPKSAKEAYGS	1	8	yes	yes	1;2	0.01266	153	-	M	E	P	K	S	0	0	0	1	0	0	1	0	0	1	1	1	1	0	1	0	1	0	0	0	0	0	6140200	0	0	0	0	4183700
A5ARE0	tr|A5ARE0|A5ARE0_VITVI	NADAIFFPPPN	11	64	152.7	1201.58	EKLFRSKRNADAIFFP	AIFFPPPN________	346	356	yes	yes	1;2	1.4452e-26		R	N	A	P	N	-	2	0	2	1	0	0	0	0	0	1	0	0	0	2	3	0	0	0	0	0	0	0	247980000	3090400	4590800	5147400	34524000	6668700
A5ARE0	tr|A5ARE0|A5ARE0_VITVI	VLEASFSVGSDMEK	14	2	67.102	1497.7	AWKALSSKVLEASFSV	SVGSDMEKLFRSKRNA	326	339	yes	yes	2	0.00036712	154	K	V	L	E	K	L	1	0	0	1	0	0	2	1	0	0	1	1	1	1	0	3	0	0	0	2	0	0	45366000	0	3706400	2959800	19037000	0
A5ARE0	tr|A5ARE0|A5ARE0_VITVI	VVVLNTQNLPLVGEVGLGADLVR	23	32	168.75	2374.36	VDIKNGGRVVVLNTQN	GLGADLVRLDGSAMCS	207	229	yes	yes	2;3	1.0693e-126		R	V	V	V	R	L	1	1	2	1	0	1	1	3	0	0	5	0	0	0	1	0	1	0	0	6	0	0	454870000	10948000	15068000	1683200	117120000	111710000
A5AS18	tr|A5AS18|A5AS18_VITVI	AFLDATGGLWR	11	7	82.445	1205.62	GMMAAQFKAFLDATGG	DATGGLWRTQQLAGKP	91	101	yes	yes	2	0.0006315		K	A	F	W	R	T	2	1	0	1	0	0	0	2	0	0	2	0	0	1	0	0	1	1	0	0	0	0	154380000	0	9172100	5589000	56066000	3152200
A5AS18	tr|A5AS18|A5AS18_VITVI	FGMMAAQFK	9	12	72.038	1029.48	FVFGFPTRFGMMAAQF	GMMAAQFKAFLDATGG	82	90	yes	yes	2	0.0011154	155;156	R	F	G	F	K	A	2	0	0	0	0	1	0	1	0	0	0	1	2	2	0	0	0	0	0	0	0	0	120580000	11281000	11394000	6203500	31235000	18911000
A5AS18	tr|A5AS18|A5AS18_VITVI	GGSPYGAGTFAGDGSR	16	1	29.422	1455.64	MFEMEKVKGGSPYGAG	TFAGDGSRQPSELELE	160	175	yes	yes	2	0.055621		K	G	G	S	R	Q	2	1	0	1	0	0	0	6	0	0	0	0	0	1	1	2	1	0	1	0	0	0	38754000	1672700	0	0	14957000	13475000
A5AS18	tr|A5AS18|A5AS18_VITVI	LWQVPETLPEEVLGK	15	7	91.657	1736.93	SVEGVEAKLWQVPETL	LPEEVLGKMSAPPKSD	37	51	yes	yes	2	7.6685e-07		K	L	W	G	K	M	0	0	0	0	0	1	3	1	0	0	3	1	0	0	2	0	1	1	0	2	0	0	80550000	4665100	6462500	5148300	16314000	11712000
A5AS18	tr|A5AS18|A5AS18_VITVI	SDTPIITPTDLAEADGFVFGFPTR	24	2	75.773	2566.26	GKMSAPPKSDTPIITP	FVFGFPTRFGMMAAQF	58	81	yes	yes	2	7.7156e-18		K	S	D	T	R	F	2	1	0	3	0	0	1	2	0	2	1	0	0	3	3	1	4	0	0	1	0	0	20753000	0	2063700	0	4948400	4554800
A5AS62	tr|A5AS62|A5AS62_VITVI	EQNIGEEIGR	10	16	139.54	1143.55	KQRHKVEREQNIGEEI	NIGEEIGRSKNKEVAK	153	162	yes	yes	2	1.8913e-10		R	E	Q	G	R	S	0	1	1	0	0	1	3	2	0	2	0	0	0	0	0	0	0	0	0	0	0	0	1091000000	3554500	2304000	0	34540000	27338000
A5ASC2	tr|A5ASC2|A5ASC2_VITVI	AYEPILLLGR	10	10	76.228	1143.67	EPEILRHKAYEPILLL	EPILLLGRHRFAGVDM	49	58	yes	yes	2	0.0030866		K	A	Y	G	R	H	1	1	0	0	0	0	1	1	0	1	3	0	0	0	1	0	0	0	1	0	0	0	254610000	187780	4401500	2522400	34654000	0
A5ASF9	tr|A5ASF9|A5ASF9_VITVI	MGDYLVDQGL	10	7	60.398	1109.51	QCNMIVERMGDYLVDQ	DYLVDQGL________	122	131	yes	yes	2	0.0035876	157	R	M	G	G	L	-	0	0	0	2	0	1	0	2	0	0	2	0	1	0	0	0	0	0	1	1	0	0	86029000	1325300	3797300	1087000	35736000	5259900
A5ASG6	tr|A5ASG6|A5ASG6_VITVI	GPIENLVDHLADPVANNAWAYATNFVPGK	29	63	163.39	3092.54	VQAIVTGKGPIENLVD	ATNFVPGK________	237	265	yes	yes	3;4	1.0832e-157		K	G	P	G	K	-	5	0	4	2	0	0	1	2	1	1	2	1	0	1	3	0	1	1	1	3	0	0	1137100000	2880100	1685000	455380	256040000	199090000
A5ASG6	tr|A5ASG6|A5ASG6_VITVI	STPQSIWYGPDR	12	32	128.21	1405.66	ITMRRTVKSTPQSIWY	SIWYGPDRPKYLGPFS	43	54	yes	yes	2	3.3714e-13		K	S	T	D	R	P	0	1	0	1	0	1	0	1	0	1	0	0	0	0	2	2	1	1	1	0	0	0	878440000	4303300	4838200	3491500	65297000	74206000
A5ASG6	tr|A5ASG6|A5ASG6_VITVI	STPQSIWYGPDRPK	14	79	194.77	1630.81	ITMRRTVKSTPQSIWY	WYGPDRPKYLGPFSEQ	43	56	yes	yes	2;3	2.3855e-89		K	S	T	P	K	Y	0	1	0	1	0	1	0	1	0	1	0	1	0	0	3	2	1	1	1	0	0	1	5881300000	50585000	37166000	31693000	849720000	580740000
A5ASG6	tr|A5ASG6|A5ASG6_VITVI	VGGGPLGEGLDAIYPGGAFDPLGLADDPDAFAELK	35	30	137.25	3413.67	MGFVEGYRVGGGPLGE	PDAFAELKVKEIKNGR	176	210	yes	yes	3;4	4.042e-135		R	V	G	L	K	V	5	0	0	5	0	0	2	8	0	1	5	1	0	2	4	0	0	0	1	1	0	0	16344000000	331480000	191970000	181530000	1627800000	1062300000
A5ASG6	tr|A5ASG6|A5ASG6_VITVI	VGGGPLGEGLDAIYPGGAFDPLGLADDPDAFAELKVK	37	1	16.838	3640.83	MGFVEGYRVGGGPLGE	AFAELKVKEIKNGRLA	176	212	yes	yes	3	0.072004		R	V	G	V	K	E	5	0	0	5	0	0	2	8	0	1	5	2	0	2	4	0	0	0	1	2	0	1	40773000	0	0	0	12415000	5008000
A5ASG6	tr|A5ASG6|A5ASG6_VITVI	YLGPFSEQTPSYLTGEFPGDYGWDTAGLSADPETFAK	37	43	98.75	4013.82	WYGPDRPKYLGPFSEQ	ADPETFAKNRELEVIH	57	93	yes	yes	3;4	6.5205e-60		K	Y	L	A	K	N	3	0	0	3	0	1	3	5	0	0	3	1	0	3	4	3	4	1	3	0	0	0	1189000000	7137900	6656800	8155300	152930000	60693000
A5ASJ8	tr|A5ASJ8|A5ASJ8_VITVI	ILQGGTGIPNVR	12	9	58.511	1223.7	LYESKLYRILQGGTGI	GTGIPNVRWFGVEGEY	58	69	yes	yes	2	0.0050026		R	I	L	V	R	W	0	1	1	0	0	1	0	3	0	2	1	0	0	0	1	0	1	0	0	1	0	0	22252000	0	0	0	0	3365000
A5ASJ8	tr|A5ASJ8|A5ASJ8_VITVI	YQQSQLATPPSR	12	5	60.157	1374.69	VFDWTILKYQQSQLAT	QLATPPSRVLGPGAGT	295	306	yes	yes	2	0.0046344		K	Y	Q	S	R	V	1	1	0	0	0	3	0	0	0	0	1	0	0	0	2	2	1	0	1	0	0	0	42551000	0	0	0	0	9267500
A5ASJ8	tr|A5ASJ8|A5ASJ8_VITVI	DIKPDNFLMGLGR	13	6	62.088	1474.76	HSKSFLHRDIKPDNFL	NFLMGLGRRANQVYII	128	140	no	no	3	0.0014109		R	D	I	G	R	R	0	1	1	2	0	0	0	2	0	1	2	1	1	1	1	0	0	0	0	0	0	1	15978000	0	0	0	3126200	0
A5ASQ0	tr|A5ASQ0|A5ASQ0_VITVI	DMPILQDGPPPGGFAPVR	18	10	88.385	1862.93	KPGMVSVKDMPILQDG	PGGFAPVRYARRIPTK	17	34	yes	yes	2	2.6082e-11	158	K	D	M	V	R	Y	1	1	0	2	0	1	0	3	0	1	1	0	1	1	5	0	0	0	0	1	0	0	75640000	0	0	0	12748000	0
A5ASQ0	tr|A5ASQ0|A5ASQ0_VITVI	SAILPVLQAEEDER	14	28	125.22	1568.8	KEEKFAARSAILPVLQ	LQAEEDERFVKEWKKY	83	96	yes	yes	2	2.3892e-17		R	S	A	E	R	F	2	1	0	1	0	1	3	0	0	1	2	0	0	0	1	1	0	0	0	1	0	0	228620000	4197700	5544600	3788900	30337000	18733000
A5ASQ0	tr|A5ASQ0|A5ASQ0_VITVI	SAILPVLQAEEDERFVK	17	5	61.87	1943.04	KEEKFAARSAILPVLQ	EEDERFVKEWKKYLEE	83	99	yes	yes	3	0.0002886		R	S	A	V	K	E	2	1	0	1	0	1	3	0	0	1	2	1	0	1	1	1	0	0	0	2	0	1	49206000	0	0	0	5527100	3162200
A5ASQ0	tr|A5ASQ0|A5ASQ0_VITVI	WMPPATGELRPEVW	14	4	61.409	1667.81	ESVYNSGRWMPPATGE	GELRPEVW________	130	143	yes	yes	2	0.024218	159	R	W	M	V	W	-	1	1	0	0	0	0	2	1	0	0	1	0	1	0	3	0	1	2	0	1	0	1	123600000	4759500	2865800	0	0	11267000
A5ASV7	tr|A5ASV7|A5ASV7_VITVI	AILFVADYELPK	12	22	83.182	1377.75	DTGWYCIRAILFVADY	VADYELPKSVRALPGP	194	205	yes	yes	2	0.00021169		R	A	I	P	K	S	2	0	0	1	0	0	1	0	0	1	2	1	0	1	1	0	0	0	1	1	0	0	156550000	1220300	2074000	0	26161000	30010000
A5ASV7	tr|A5ASV7|A5ASV7_VITVI	ALPGPVLNK	9	1	66.457	907.549	YELPKSVRALPGPVLN	LPGPVLNKTGVLKSCG	209	217	yes	yes	2	0.0094738		R	A	L	N	K	T	1	0	1	0	0	0	0	1	0	0	2	1	0	0	2	0	0	0	0	1	0	0	183130000	2823700	2003700	2018500	25513000	21654000
A5ASV7	tr|A5ASV7|A5ASV7_VITVI	GLEPVEV	7	2	121.68	741.391	AVKASIERGLEPVEV_	RGLEPVEV________	352	358	yes	yes	1	0.0023392		R	G	L	E	V	-	0	0	0	0	0	0	2	1	0	0	1	0	0	0	1	0	0	0	0	2	0	0	27786000	1089800	1723200	0	7966200	8547000
A5ASV7	tr|A5ASV7|A5ASV7_VITVI	TMPSEHVVTTDLPQEALMVR	20	21	109.65	2253.11	NELVTGWRTMPSEHVV	PQEALMVREFSGLVAD	292	311	yes	yes	3	5.9758e-27	160;161	R	T	M	V	R	E	1	1	0	1	0	1	2	0	1	0	2	0	2	0	2	1	3	0	0	3	0	0	160010000	2655100	6156400	1164300	60557000	40263000
A5ASV7	tr|A5ASV7|A5ASV7_VITVI	MKEFLSDPQR	10	1	73.435	1249.61	MHHPRTAKMKEFLSDP	EFLSDPQRFGQLKSVQ	139	148	yes	no	2	0.038896		K	M	K	Q	R	F	0	1	0	1	0	1	1	0	0	0	1	1	1	1	1	1	0	0	0	0	0	1	10041000	1190600	0	0	5013000	3837800
A5ASV7	tr|A5ASV7|A5ASV7_VITVI	AITLAPNATLYAVGSR	16	14	115.8	1616.89	DIARKVSRAITLAPNA	TLYAVGSRSLEKATRF	23	38	yes	no	2;3	4.6953e-17		R	A	I	S	R	S	4	1	1	0	0	0	0	1	0	1	2	0	0	0	1	1	2	0	1	1	0	0	179800000	1972600	2994200	1969500	44895000	35193000
A5ASW8	tr|A5ASW8|A5ASW8_VITVI	AGGNLVDPEWLDGSLPGDYGFDPLGLGK	28	30	116.24	2858.38	KSWLPGVKAGGNLVDP	FDPLGLGKDPAFLKWY	62	89	yes	yes	2;3	2.0321e-54		K	A	G	G	K	D	1	0	1	4	0	0	1	7	0	0	5	1	0	1	3	1	0	1	1	1	0	0	675310000	2502800	1823700	920620	123880000	54431000
A5ASW8	tr|A5ASW8|A5ASW8_VITVI	AGGNLVDPEWLDGSLPGDYGFDPLGLGKDPAFLK	34	47	116.82	3529.74	KSWLPGVKAGGNLVDP	GKDPAFLKWYREAELI	62	95	yes	yes	3;4	5.7597e-80		K	A	G	L	K	W	2	0	1	5	0	0	1	7	0	0	6	2	0	2	4	1	0	1	1	1	0	1	2392300000	14594000	15594000	7780000	250580000	161850000
A5ASW8	tr|A5ASW8|A5ASW8_VITVI	DGVYIPDVEK	10	23	108.31	1133.56	LSLAGTIKDGVYIPDV	VYIPDVEKLERLKLAE	210	219	yes	yes	2	7.9444e-06		K	D	G	E	K	L	0	0	0	2	0	0	1	1	0	1	0	1	0	0	1	0	0	0	1	2	0	0	1058100000	15486000	15294000	9618800	181970000	146210000
A5ASW8	tr|A5ASW8|A5ASW8_VITVI	DGVYIPDVEKLER	13	30	80.96	1531.79	LSLAGTIKDGVYIPDV	PDVEKLERLKLAEIKH	210	222	yes	yes	2;3	0.00035864		K	D	G	E	R	L	0	1	0	2	0	0	2	1	0	1	1	1	0	0	1	0	0	0	1	2	0	1	665150000	1125100	8714000	4966500	115650000	79733000
A5ASW8	tr|A5ASW8|A5ASW8_VITVI	FFDPLSLAGTIK	12	73	113.82	1307.71	EQGYPGGKFFDPLSLA	LSLAGTIKDGVYIPDV	198	209	yes	yes	2;3	7.6595e-08		K	F	F	I	K	D	1	0	0	1	0	0	0	1	0	1	2	1	0	2	1	1	1	0	0	0	0	0	3355700000	37530000	37326000	19675000	490260000	440090000
A5ASW8	tr|A5ASW8|A5ASW8_VITVI	FFDPLSLAGTIKDGVYIPDVEK	22	4	92.01	2423.26	EQGYPGGKFFDPLSLA	VYIPDVEKLERLKLAE	198	219	yes	yes	3	1.2139e-20		K	F	F	E	K	L	1	0	0	3	0	0	1	2	0	2	2	2	0	2	2	1	1	0	1	2	0	1	125480000	0	0	0	48875000	16233000
A5ASW8	tr|A5ASW8|A5ASW8_VITVI	SWLPGVK	7	17	66.993	785.444	VVAAAPKKSWLPGVKA	KSWLPGVKAGGNLVDP	55	61	yes	yes	2	0.047914		K	S	W	V	K	A	0	0	0	0	0	0	0	1	0	0	1	1	0	0	1	1	0	1	0	1	0	0	451460000	3220300	3752800	4198200	71755000	15966000
A5ASW8	tr|A5ASW8|A5ASW8_VITVI	TAENFANATGEQGYPGGK	18	68	330.74	1810.81	EWATPWSRTAENFANA	EQGYPGGKFFDPLSLA	180	197	yes	yes	2;3	0		R	T	A	G	K	F	3	0	2	0	0	1	2	4	0	0	0	1	0	1	1	0	2	0	1	0	0	0	3569400000	39556000	40921000	26118000	788410000	436820000
A5ASW8	tr|A5ASW8|A5ASW8_VITVI	TPLGALGL	8	1	116.87	740.443	YFEAGQGKTPLGALGL	TPLGALGL________	250	257	yes	yes	1	4.9984e-09		K	T	P	G	L	-	1	0	0	0	0	0	0	2	0	0	3	0	0	0	1	0	1	0	0	0	0	0	1186100000	7162900	10656000	6692700	219500000	159610000
A5ASW8	tr|A5ASW8|A5ASW8_VITVI	WVDFFNPESQSVEWATPWSR	20	53	189.55	2467.12	MGWVESKRWVDFFNPE	EWATPWSRTAENFANA	160	179	yes	yes	2;3	5.8084e-140		R	W	V	S	R	T	1	1	1	1	0	1	2	0	0	0	0	0	0	2	2	3	1	3	0	2	0	0	855960000	7606900	6808300	4797100	165390000	109320000
A5AT05	tr|A5AT05|A5AT05_VITVI	GAGYTFGQDISEQFNHTNNLK	21	3	73.722	2340.08	CGWGISPRGAGYTFGQ	FNHTNNLKLIARAHQL	220	240	yes	no	3	6.2817e-13		R	G	A	L	K	L	1	0	3	1	0	2	1	3	1	1	1	1	0	2	0	1	2	0	1	0	0	0	34643000	0	0	0	8634500	4848400
A5AT60	tr|A5AT60|A5AT60_VITVI	GTVEFDESPPDGYDPENPYKDPVVYFDMR	29	1	24.612	3377.47	________________	PVVYFDMREYQVREKW	6	34	yes	yes	3	0.0039834		K	G	T	M	R	E	0	1	1	5	0	0	3	2	0	0	0	1	1	2	5	1	1	0	3	3	0	1	10444000	0	0	0	0	0
A5AT60	tr|A5AT60|A5AT60_VITVI	HLVQQYLDATR	11	22	130.99	1342.7	VNHLQKCRHLVQQYLD	QQYLDATRGIGWGKDG	72	82	yes	yes	2	2.3092e-12		R	H	L	T	R	G	1	1	0	1	0	2	0	0	1	0	2	0	0	0	0	0	1	0	1	1	0	0	216310000	4144100	4122900	4394300	0	16893000
A5ATD8	tr|A5ATD8|A5ATD8_VITVI	DATDDFEDVGHSSSAR	16	3	123.4	1707.7	VLLSATGKDATDDFED	VGHSSSARAMMDEFHV	53	68	yes	yes	2	1.5664e-22		K	D	A	A	R	A	2	1	0	4	0	0	1	1	1	0	0	0	0	1	0	3	1	0	0	1	0	0	19707000	0	0	0	5313800	6160900
A5ATG8	tr|A5ATG8|A5ATG8_VITVI	YVGTSDLQLER	11	8	91.961	1279.64	HGIDPTGRYVGTSDLQ	TSDLQLERVNVYYNEA	36	46	yes	yes	2	0.00030069		R	Y	V	E	R	V	0	1	0	1	0	1	1	1	0	0	2	0	0	0	0	1	1	0	1	1	0	0	154280000	12063000	13439000	14889000	45204000	27801000
A5AU19	tr|A5AU19|A5AU19_VITVI	QLDQMGYNIGIR	12	14	122.33	1406.7	EEVEEVNKQLDQMGYN	MGYNIGIRLIDEFLAK	48	59	yes	yes	2	3.7069e-12	172	K	Q	L	I	R	L	0	1	1	1	0	2	0	2	0	2	1	0	1	0	0	0	0	0	1	0	0	0	101330000	0	0	1983000	18444000	6723100
A5AU19	tr|A5AU19|A5AU19_VITVI	QLLTDLEEVEEVNK	14	15	129.74	1657.84	LTYGAIVRQLLTDLEE	EEVEEVNKQLDQMGYN	34	47	yes	yes	2	2.7983e-23		R	Q	L	N	K	Q	0	0	1	1	0	1	4	0	0	0	3	1	0	0	0	0	1	0	0	2	0	0	91643000	1408100	3240800	1181200	10823000	6983800
A5AU19	tr|A5AU19|A5AU19_VITVI	SGDAIFANVER	11	6	62.088	1177.57	________________	AIFANVERVNAELFTL	8	18	yes	yes	2	0.0069473		R	S	G	E	R	V	2	1	1	1	0	0	1	1	0	1	0	0	0	1	0	1	0	0	0	1	0	0	52753000	2914400	3268500	2951500	13921000	9011700
A5AU19	tr|A5AU19|A5AU19_VITVI	TEVTWIR	7	1	91.626	903.481	ALEMVSMKTEVTWIRD	KTEVTWIRDMLRGDDA	151	157	yes	yes	2	0.0025857		K	T	E	I	R	D	0	1	0	0	0	0	1	0	0	1	0	0	0	0	0	0	2	1	0	1	0	0	0	0	0	0	0	0
A5AU19	tr|A5AU19|A5AU19_VITVI	VNAELFTLTYGAIVR	15	2	77.42	1665.91	AIFANVERVNAELFTL	LTYGAIVRQLLTDLEE	19	33	yes	yes	3	7.6017e-05		R	V	N	V	R	Q	2	1	1	0	0	0	1	1	0	1	2	0	0	1	0	0	2	0	1	2	0	0	12408000	0	0	0	2455500	0
A5AU65	tr|A5AU65|A5AU65_VITVI	MVQPVIQER	9	2	63.216	1098.59	QGDLDWVRMVQPVIQE	VQPVIQERIERYSRSE	196	204	yes	yes	2	0.0072564	173	R	M	V	E	R	I	0	1	0	0	0	2	1	0	0	1	0	0	1	0	1	0	0	0	0	2	0	0	0	0	0	0	0	0
A5AUJ0	tr|A5AUJ0|A5AUJ0_VITVI	AFIWVIQPGSGR	12	13	84.605	1329.72	LALEASNRAFIWVIQP	VIQPGSGRPGPPRPPG	340	351	yes	yes	2	0.00019282		R	A	F	G	R	P	1	1	0	0	0	1	0	2	0	2	0	0	0	1	1	1	0	1	0	1	0	0	96131000	252420	1782200	998790	15269000	0
A5AUJ0	tr|A5AUJ0|A5AUJ0_VITVI	HQHQMGTAIESLLSSR	16	4	79.393	1793.88	DPMSHHHRHQHQMGTA	IESLLSSRSTSPDYVP	86	101	yes	yes	3	9.6987e-06		R	H	Q	S	R	S	1	1	0	0	0	2	1	1	2	1	2	0	1	0	0	3	1	0	0	0	0	0	94062000	0	0	0	13628000	12845000
A5AUJ0	tr|A5AUJ0|A5AUJ0_VITVI	AGAFNIKPGEVLPLPGLPEDMALTYSDLQR	30	4	47.383	3211.66	AMEYASWKAGAFNIKP	LTYSDLQRGPHGPPGG	153	182	no	no	3	9.1228e-09		K	A	G	Q	R	G	3	1	1	2	0	1	2	3	0	1	5	1	1	1	4	1	1	0	1	1	0	1	79732000	0	0	0	0	0
A5AUJ0	tr|A5AUJ0|A5AUJ0_VITVI	GVPFLAWPIR	10	30	119.21	1154.66	STVEATGRGVPFLAWP	PFLAWPIRGDQYYDAM	418	427	no	no	2	8.037e-07		R	G	V	I	R	G	1	1	0	0	0	0	0	1	0	1	1	0	0	1	2	0	0	1	0	1	0	0	374900000	3756600	3811800	2560600	50140000	20640000
A5AUJ0	tr|A5AUJ0|A5AUJ0_VITVI	TFNTTLIISSNLSSSIPSDLR	21	3	57.142	2265.19	LCKHLASRTFNTTLII	SSIPSDLRRIPLIHIF	30	50	no	no	2;3	2.5124e-06		R	T	F	L	R	R	0	1	2	1	0	0	0	0	0	3	3	0	0	1	1	6	3	0	0	0	0	0	15671000	0	0	0	0	8167200
A5AUW4	tr|A5AUW4|A5AUW4_VITVI	DAGSTASTAILVGDR	15	2	52.862	1432.72	KSENNQNRDAGSTAST	TAILVGDRLLVANVGD	123	137	yes	yes	2	0.0033792		R	D	A	D	R	L	3	1	0	2	0	0	0	2	0	1	1	0	0	0	0	2	2	0	0	1	0	0	19077000	0	0	0	7029600	3946500
A5AUW4	tr|A5AUW4|A5AUW4_VITVI	LLVANVGDSR	10	2	45.829	1042.58	TAILVGDRLLVANVGD	VANVGDSRAVICRGGN	138	147	yes	no	2	0.021283		R	L	L	S	R	A	1	1	1	1	0	0	0	1	0	0	2	0	0	0	0	1	0	0	0	2	0	0	54241000	0	0	0	27610000	0
A5AW35	tr|A5AW35|A5AW35_VITVI	EGEPSIAPSLTLTGR	15	49	170.11	1526.79	MYGIASFKEGEPSIAP	PSLTLTGRTKEPDQLQ	162	176	yes	yes	2	1.0288e-77		K	E	G	G	R	T	1	1	0	0	0	0	2	2	0	1	2	0	0	0	2	2	2	0	0	0	0	0	2603600000	41035000	50140000	37515000	513450000	271980000
A5AW35	tr|A5AW35|A5AW35_VITVI	EPDQLQSADGWAK	13	1	38.161	1443.66	LTLTGRTKEPDQLQSA	QSADGWAKFTGGFFFG	179	191	yes	yes	2	0.050334		K	E	P	A	K	F	2	0	0	2	0	2	1	1	0	0	1	1	0	0	1	1	0	1	0	0	0	0	66511000	0	0	0	0	0
A5AW35	tr|A5AW35|A5AW35_VITVI	GIEVGLAHGFLLVGPFVK	18	21	131.56	1852.06	TAVSPVLRGIEVGLAH	LLVGPFVKTGPLRDTP	106	123	yes	yes	2;3	1.0178e-42		R	G	I	V	K	T	1	0	0	0	0	0	1	4	1	1	3	1	0	2	1	0	0	0	0	3	0	0	412390000	0	0	0	33345000	45630000
A5AW35	tr|A5AW35|A5AW35_VITVI	TAVSPVLR	8	27	128.61	841.502	LSNLPAYRTAVSPVLR	TAVSPVLRGIEVGLAH	98	105	yes	yes	2	0.0010827		R	T	A	L	R	G	1	1	0	0	0	0	0	0	0	0	1	0	0	0	1	1	1	0	0	2	0	0	5921600000	87018000	86948000	93941000	847730000	1152200000
A5AW35	tr|A5AW35|A5AW35_VITVI	TKEPDQLQSADGWAK	15	44	223.76	1672.81	PSLTLTGRTKEPDQLQ	QSADGWAKFTGGFFFG	177	191	yes	yes	2;3	5.2414e-178		R	T	K	A	K	F	2	0	0	2	0	2	1	1	0	0	1	2	0	0	1	1	1	1	0	0	0	1	996380000	11754000	14765000	12130000	200820000	126730000
A5AWT3	tr|A5AWT3|A5AWT3_VITVI	GVYQFVDK	8	21	103.83	954.481	SGRKGKGKGVYQFVDK	GVYQFVDKYGANVDGY	75	82	yes	yes	1;2	0.0064673		K	G	V	D	K	Y	0	0	0	1	0	1	0	1	0	0	0	1	0	1	0	0	0	0	1	2	0	0	701170000	5028800	9161000	6622300	149410000	101900000
A5AWT3	tr|A5AWT3|A5AWT3_VITVI	IKTDKPYGIGGGMK	14	1	48.467	1463.78	VEASGGKKIKTDKPYG	YGIGGGMKLSDGLDAS	46	59	yes	yes	3	0.016233		K	I	K	M	K	L	0	0	0	1	0	0	0	4	0	2	0	3	1	0	1	0	1	0	1	0	0	2	0	0	0	0	0	0
A5AWT3	tr|A5AWT3|A5AWT3_VITVI	LSDGLDASGR	10	2	78.342	989.478	YGIGGGMKLSDGLDAS	DGLDASGRKGKGKGVY	60	69	yes	yes	2	0.0026809		K	L	S	G	R	K	1	1	0	2	0	0	0	2	0	0	2	0	0	0	0	2	0	0	0	0	0	0	4174000	4174000	0	0	0	0
A5AWW0	tr|A5AWW0|A5AWW0_VITVI	DRPVPIPGSGMQLTNIAHVR	20	5	123.12	2157.15	WFFDRIVRDRPVPIPG	LTNIAHVRDLSSMLTL	249	268	yes	yes	3	1.1482e-35	174	R	D	R	V	R	D	1	2	1	1	0	1	0	2	1	2	1	0	1	0	3	1	1	0	0	2	0	1	72332000	0	0	0	21737000	16978000
A5AX75	tr|A5AX75|A5AX75_VITVI	ASTLPENLTR	10	18	101.3	1100.58	________________	TLPENLTREQYVYLAK	2	11	yes	yes	2	4.6676e-05		M	A	S	T	R	E	1	1	1	0	0	0	1	0	0	0	2	0	0	0	1	1	2	0	0	0	0	0	1520000000	34403000	42499000	38517000	0	228870000
A5AX75	tr|A5AX75|A5AX75_VITVI	DAAEETMLAYK	11	15	87.184	1240.56	FKVGNEKKDAAEETML	EETMLAYKSAQDIALA	153	163	yes	yes	2	0.00045708	175	K	D	A	Y	K	S	3	0	0	1	0	0	2	0	0	0	1	1	1	0	0	0	1	0	1	0	0	0	69254000	2849500	3968800	1749600	17139000	11033000
A5AX75	tr|A5AX75|A5AX75_VITVI	EQYVYLAK	8	16	93.374	1012.52	TLPENLTREQYVYLAK	EQYVYLAKLAEQAERY	12	19	yes	yes	1;2	0.012569		R	E	Q	A	K	L	1	0	0	0	0	1	1	0	0	0	1	1	0	0	0	0	0	0	2	1	0	0	611010000	14804000	12687000	12810000	80809000	64877000
A5AX75	tr|A5AX75|A5AX75_VITVI	LAEQAERYEEMVK	13	1	32.478	1594.77	EQYVYLAKLAEQAERY	ERYEEMVKFMEKLVIG	20	32	yes	yes	3	0.057839		K	L	A	V	K	F	2	1	0	0	0	1	4	0	0	0	1	1	1	0	0	0	0	0	1	1	0	1	0	0	0	0	0	0
A5AX75	tr|A5AX75|A5AX75_VITVI	LLDSHLIPSASTSESK	16	30	165.45	1683.87	EVCAGILKLLDSHLIP	SASTSESKVFYMKMKG	113	128	yes	yes	2;3	2.0115e-66		K	L	L	S	K	V	1	0	0	1	0	0	1	0	1	1	3	1	0	0	1	5	1	0	0	0	0	0	397360000	8333800	5703400	5789800	69775000	53101000
A5AX75	tr|A5AX75|A5AX75_VITVI	NLLSVAYKNVIGSLR	15	3	98.281	1645.95	SELTVEERNLLSVAYK	KNVIGSLRAAWRIVSS	53	67	yes	yes	2;3	6.947e-08		R	N	L	L	R	A	1	1	2	0	0	0	0	1	0	1	3	1	0	0	0	2	0	0	1	2	0	1	26461000	565740	0	0	0	3582600
A5AX75	tr|A5AX75|A5AX75_VITVI	NVIGSLR	7	20	117.93	757.445	NLLSVAYKNVIGSLRA	KNVIGSLRAAWRIVSS	61	67	yes	yes	2	0.014117		K	N	V	L	R	A	0	1	1	0	0	0	0	1	0	1	1	0	0	0	0	1	0	0	0	1	0	0	532560000	9924800	10909000	6846900	51359000	42277000
A5AX75	tr|A5AX75|A5AX75_VITVI	QAFEEAIAELDTLGEESYK	19	5	62.739	2142	DKACSMAKQAFEEAIA	TLGEESYKDSTLIMQL	207	225	yes	yes	2;3	1.1989e-05		K	Q	A	Y	K	D	3	0	0	1	0	1	5	1	0	1	2	1	0	1	0	1	1	0	1	0	0	0	42883000	0	0	872870	16625000	7313000
A5AX75	tr|A5AX75|A5AX75_VITVI	SAQDIALADLAPTHPIR	17	33	159.4	1787.95	EETMLAYKSAQDIALA	LAPTHPIRLGLALNFS	164	180	yes	yes	2;3	5.3882e-69		K	S	A	I	R	L	4	1	0	2	0	1	0	0	1	2	2	0	0	0	2	1	1	0	0	0	0	0	420840000	14315000	12257000	9104900	96752000	58607000
A5AXI5	tr|A5AXI5|A5AXI5_VITVI	AALEEMDAD	9	1	62.717	963.386	EEAKAAAKAALEEMDA	ALEEMDAD________	241	249	yes	yes	1	0.054931		K	A	A	A	D	-	3	0	0	2	0	0	2	0	0	0	1	0	1	0	0	0	0	0	0	0	0	0	2273200	0	0	0	2273200	0
A5AXI5	tr|A5AXI5|A5AXI5_VITVI	AEATNYQSVYGEAIPVK	17	11	156.11	1838.9	RQIVARAKAEATNYQS	YGEAIPVKELAERVAS	94	110	yes	yes	2	1.6777e-68		K	A	E	V	K	E	3	0	1	0	0	1	2	1	0	1	0	1	0	0	1	1	1	0	2	2	0	0	151820000	3410000	0	3308900	33845000	23838000
A5AXI5	tr|A5AXI5|A5AXI5_VITVI	AKAEATNYQSVYGEAIPVK	19	1	36.454	2038.04	DGRQIVARAKAEATNY	YGEAIPVKELAERVAS	92	110	yes	yes	3	0.016874		R	A	K	V	K	E	4	0	1	0	0	1	2	1	0	1	0	2	0	0	1	1	1	0	2	2	0	1	9032100	0	0	0	0	4148800
A5AXI5	tr|A5AXI5|A5AXI5_VITVI	AVDNSGTVIGIK	12	4	60.161	1172.64	FQIEYAAKAVDNSGTV	SGTVIGIKCKDGIVLG	30	41	yes	yes	2	0.0046319		K	A	V	I	K	C	1	0	1	1	0	0	0	2	0	2	0	1	0	0	0	1	1	0	0	2	0	0	74680000	0	0	0	30956000	0
A5AXI5	tr|A5AXI5|A5AXI5_VITVI	DGPQLYMVEPSGVSYR	16	36	119.46	1796.84	VILGGYDRDGPQLYMV	EPSGVSYRYFGAAIGK	144	159	yes	yes	2	1.0482e-22	176	R	D	G	Y	R	Y	0	1	0	1	0	1	1	2	0	0	1	0	1	0	2	2	0	0	2	2	0	0	408920000	1580500	2422700	0	101540000	54519000
A5AXI5	tr|A5AXI5|A5AXI5_VITVI	HSGMAVAGLAADGR	14	30	142.55	1311.64	RRIHSVHRHSGMAVAG	AGLAADGRQIVARAKA	73	86	yes	yes	2;3	2.322e-31	177	R	H	S	G	R	Q	4	1	0	1	0	0	0	3	1	0	1	0	1	0	0	1	0	0	0	1	0	0	373730000	3683200	40575000	25967000	63376000	55563000
A5AXI5	tr|A5AXI5|A5AXI5_VITVI	IIYGVHDEAK	10	0	51.531	1143.59	QGVIEVAKIIYGVHDE	YGVHDEAKDKAFELEM	196	205	yes	yes	2	0.058637		K	I	I	A	K	D	1	0	0	1	0	0	1	1	1	2	0	1	0	0	0	0	0	0	1	1	0	0	4405800	1679600	2726100	0	0	0
A5AXI5	tr|A5AXI5|A5AXI5_VITVI	SSIGTGYDLSVTTFSPDGR	19	2	74.029	1958.92	________________	TTFSPDGRVFQIEYAA	2	20	yes	yes	2	4.1702e-09		M	S	S	G	R	V	0	1	0	2	0	0	0	3	0	1	1	0	0	1	1	4	3	0	1	1	0	0	11732000	0	0	0	0	3935700
A5AXI5	tr|A5AXI5|A5AXI5_VITVI	VFQIEYAAK	9	11	93.649	1067.57	TTFSPDGRVFQIEYAA	FQIEYAAKAVDNSGTV	21	29	yes	yes	2	0.0027436		R	V	F	A	K	A	2	0	0	0	0	1	1	0	0	1	0	1	0	1	0	0	0	0	1	1	0	0	198890000	2877000	3662700	2120500	34981000	21840000
A5AXI5	tr|A5AXI5|A5AXI5_VITVI	YFGAAIGK	8	15	127.66	825.438	EPSGVSYRYFGAAIGK	YFGAAIGKGRQAAKTE	160	167	yes	yes	1;2	0.010256		R	Y	F	G	K	G	2	0	0	0	0	0	0	2	0	1	0	1	0	1	0	0	0	0	1	0	0	0	350890000	3655600	2522300	2521500	37917000	33332000
A5AXR4	tr|A5AXR4|A5AXR4_VITVI	GEPLTVQAPGTQTR	14	7	65.374	1453.75	NFIAQALRGEPLTVQA	QAPGTQTRSFCYVSDM	229	242	yes	yes	2	0.0014895		R	G	E	T	R	S	1	1	0	0	0	2	1	2	0	0	1	0	0	0	2	0	3	0	0	1	0	0	86883000	3017400	2720700	2578400	17786000	14168000
A5AXR4	tr|A5AXR4|A5AXR4_VITVI	HDVTEPLLIEVDK	13	4	88.706	1506.79	HPRFELIRHDVTEPLL	PLLIEVDKIYHLACPA	88	100	yes	yes	2	0.00013867		R	H	D	D	K	I	0	0	0	2	0	0	2	0	1	1	2	1	0	0	1	0	1	0	0	2	0	0	29768000	0	0	0	5401300	5659400
A5AXR4	tr|A5AXR4|A5AXR4_VITVI	ILLTSTSEVYGDPLEHPQTESYWGNVNPIGVR	32	5	51.783	3570.76	LAKRVGARILLTSTSE	NVNPIGVRSCYDEGKR	142	173	yes	yes	3	1.7023e-12		R	I	L	V	R	S	0	1	2	1	0	1	3	3	1	2	3	0	0	0	3	3	3	1	2	3	0	0	59842000	0	0	0	11978000	10179000
A5AXR4	tr|A5AXR4|A5AXR4_VITVI	VVSNFIAQALR	11	14	90.913	1216.69	RMNIDDGRVVSNFIAQ	NFIAQALRGEPLTVQA	218	228	yes	yes	2	0.00031984		R	V	V	L	R	G	2	1	1	0	0	1	0	0	0	1	1	0	0	1	0	1	0	0	0	2	0	0	283680000	4261500	11416000	9636700	56965000	32759000
A5AY31	tr|A5AY31|A5AY31_VITVI	QYIQEPPTVEK	11	9	88.021	1330.68	KQLMEQNKQYIQEPPT	QEPPTVEKCNLLSKQL	36	46	yes	yes	2	0.0004263		K	Q	Y	E	K	C	0	0	0	0	0	2	2	0	0	1	0	1	0	0	2	0	1	0	1	1	0	0	72915000	0	0	0	10187000	5520000
A5AY31	tr|E0CT31|E0CT31_VITVI	GFTFTGYYV	9	8	132.09	1053.48	CAGEIVGRGFTFTGYY	FTFTGYYV________	114	122	no	no	1	0.00041457		R	G	F	Y	V	-	0	0	0	0	0	0	0	2	0	0	0	0	0	2	0	0	2	0	2	1	0	0	325790000	4907900	4297700	2746300	41332000	41263000
A5AY31	tr|E0CT31|E0CT31_VITVI	LASIPGR	7	3	110.61	712.423	AKQLFYTRLASIPGRY	RLASIPGRYESFWKEL	59	65	no	no	2	0.01495		R	L	A	G	R	Y	1	1	0	0	0	0	0	1	0	1	1	0	0	0	1	1	0	0	0	0	0	0	28286000	13451000	12759000	0	0	0
A5AY42	tr|A5AY42|A5AY42_VITVI	AFDEVNSTLQTK	12	3	101.64	1351.66	KEFATLRRAFDEVNST	VNSTLQTKFSQEPEPI	43	54	yes	yes	2	2.2254e-05		R	A	F	T	K	F	1	0	1	1	0	1	1	0	0	0	1	1	0	1	0	1	2	0	0	1	0	0	77111000	0	0	0	21309000	15798000
A5AY42	tr|A5AY42|A5AY42_VITVI	EAYESISVPK	10	5	63.624	1121.56	SRLVDMYKEAYESISV	YESISVPKYVDTVTPQ	81	90	yes	yes	2	0.0099019		K	E	A	P	K	Y	1	0	0	0	0	0	2	0	0	1	0	1	0	0	1	2	0	0	1	1	0	0	34508000	1801600	1830300	1441700	0	0
A5AY42	tr|A5AY42|A5AY42_VITVI	FDALLVELK	9	1	76.228	1046.6	VTPQYKPKFDALLVEL	DALLVELKEAEEKSLK	103	111	yes	yes	2	0.0055706		K	F	D	L	K	E	1	0	0	1	0	0	1	0	0	0	3	1	0	1	0	0	0	0	0	1	0	0	1065300	0	0	0	0	1065300
A5AY42	tr|A5AY42|A5AY42_VITVI	FSQEPEPIDWEYYR	14	8	83.856	1857.82	VNSTLQTKFSQEPEPI	PIDWEYYRRGIGSRLV	55	68	yes	yes	2	0.00029131		K	F	S	Y	R	R	0	1	0	1	0	1	3	0	0	1	0	0	0	1	2	1	0	1	2	0	0	0	51336000	1225300	2536900	1700200	9948800	4604400
A5AY42	tr|A5AY42|A5AY42_VITVI	YVDTVTPQYKPK	12	2	74.611	1437.75	YESISVPKYVDTVTPQ	VTPQYKPKFDALLVEL	91	102	yes	yes	2	0.0069976		K	Y	V	P	K	F	0	0	0	1	0	1	0	0	0	0	0	2	0	0	2	0	2	0	2	2	0	1	9473600	2094900	1774200	0	0	0
A5AY56	tr|A5AY56|A5AY56_VITVI	EMALIGMR	8	1	111.29	919.462	PEVYHFDREMALIGMR	EMALIGMRYLEPPHII	108	115	yes	yes	2	0.00069322		R	E	M	M	R	Y	1	1	0	0	0	0	1	1	0	1	1	0	2	0	0	0	0	0	0	0	0	0	114010000	0	0	0	14486000	0
A5AY56	tr|A5AY56|A5AY56_VITVI	FTALWDEHR	9	1	48.284	1173.56	TWNLFHKKFTALWDEH	TALWDEHRNGSGEAYL	312	320	yes	yes	2	0.059502		K	F	T	H	R	N	1	1	0	1	0	0	1	0	1	0	1	0	0	1	0	0	1	1	0	0	0	0	0	0	0	0	0	0
A5AY56	tr|A5AY56|A5AY56_VITVI	LANQLDGLQIK	11	8	118.9	1211.69	ATPALSSKLANQLDGL	QLDGLQIKEVGDGNLN	28	38	yes	yes	2	3.0077e-10		K	L	A	I	K	E	1	0	1	1	0	2	0	1	0	1	3	1	0	0	0	0	0	0	0	0	0	0	96831000	1577700	1634700	1129500	16254000	21669000
A5AY56	tr|A5AY56|A5AY56_VITVI	LTEQVVFSDPYK	12	5	100.22	1424.72	CGNVELCRLTEQVVFS	VVFSDPYKVSQYNRWT	178	189	yes	yes	2	1.2443e-09		R	L	T	Y	K	V	0	0	0	1	0	1	1	0	0	0	1	1	0	1	1	1	1	0	1	2	0	0	50029000	0	0	0	0	19775000
A5AY56	tr|A5AY56|A5AY56_VITVI	SLIEYIK	7	2	67.032	864.496	GFRPLDDKSLIEYIKA	KSLIEYIKATPALSSK	13	19	yes	yes	2	0.04787		K	S	L	I	K	A	0	0	0	0	0	0	1	0	0	2	1	1	0	0	0	1	0	0	1	0	0	0	12520000	0	0	0	4503000	0
A5AY56	tr|A5AY56|A5AY56_VITVI	AYFEATALR	9	17	92.051	1040.53	SWPMTKERAYFEATAL	YFEATALREQRRWCSD	81	89	yes	no	2	0.0029437		R	A	Y	L	R	E	3	1	0	0	0	0	1	0	0	0	1	0	0	1	0	0	1	0	1	0	0	0	330720000	6070600	4097400	3754800	51654000	26684000
A5AY56	tr|A5AY56|A5AY56_VITVI	GLIAGIEYPLLAEHMSEFMAR	21	11	93.776	2347.17	PPHIILRKGLIAGIEY	HMSEFMARTLFFTSLL	127	147	yes	no	3	4.2577e-25		K	G	L	A	R	T	3	1	0	0	0	0	3	2	1	2	3	0	2	1	1	1	0	0	1	0	0	0	46330000	0	0	0	10326000	5290500
A5AY56	tr|A5AY56|A5AY56_VITVI	IVGVAHVEDFESIVDASK	18	9	145.91	1913.97	GAAKMIRRIVGVAHVE	ESIVDASKRANCERQA	365	382	yes	no	2;3	1.8947e-58		R	I	V	S	K	R	2	0	0	2	0	0	2	1	1	2	0	1	0	1	0	2	0	0	0	4	0	0	88512000	0	0	0	30076000	3854200
A5AY56	tr|A5AY56|A5AY56_VITVI	IVGVAHVEDFESIVDASKR	19	1	21.47	2070.07	GAAKMIRRIVGVAHVE	SIVDASKRANCERQAL	365	383	yes	no	3	0.019114		R	I	V	K	R	A	2	1	0	2	0	0	2	1	1	2	0	1	0	1	0	2	0	0	0	4	0	1	6325400	0	0	0	0	0
A5AY56	tr|A5AY56|A5AY56_VITVI	RIVGVAHVEDFESIVDASK	19	0	37.169	2070.07	FGAAKMIRRIVGVAHV	ESIVDASKRANCERQA	364	382	yes	no	3	0.002749		R	R	I	S	K	R	2	1	0	2	0	0	2	1	1	2	0	1	0	1	0	2	0	0	0	4	0	1	8686000	0	0	0	0	0
A5AY56	tr|A5AY56|A5AY56_VITVI	YLEPPHIILR	10	29	91.087	1249.72	EMALIGMRYLEPPHII	EPPHIILRKGLIAGIE	116	125	yes	no	2;3	0.00020838		R	Y	L	L	R	K	0	1	0	0	0	0	1	0	1	2	2	0	0	0	2	0	0	0	1	0	0	0	404280000	4679100	2932000	1972500	78962000	53788000
A5AY88	tr|A5AY88|A5AY88_VITVI	LIIVANQLPIR	11	1	58.699	1248.79	SSSVQRDRLIIVANQL	VANQLPIRAQRKSENN	62	72	yes	yes	2	0.011489		R	L	I	I	R	A	1	1	1	0	0	1	0	0	0	3	2	0	0	0	1	0	0	0	0	1	0	0	0	0	0	0	0	0
A5AY88	tr|A5AY88|A5AY88_VITVI	SFLQDLER	8	2	56.258	1006.51	HDVGYWARSFLQDLER	SFLQDLERTCRDHVRR	544	551	yes	yes	2	0.052609		R	S	F	E	R	T	0	1	0	1	0	1	1	0	0	0	2	0	0	1	0	1	0	0	0	0	0	0	12446000	0	0	0	0	0
A5AY88	tr|A5AY88|A5AY88_VITVI	YVSTHDVGYWAR	12	1	27.098	1452.68	LRHEKHYRYVSTHDVG	HDVGYWARSFLQDLER	532	543	yes	yes	3	0.052548		R	Y	V	A	R	S	1	1	0	1	0	0	0	1	1	0	0	0	0	0	0	1	1	1	2	2	0	0	7306300	0	0	0	5916300	0
A5AY88	tr|A5AY88|A5AY88_VITVI	VVLVQIANPAR	11	3	75.387	1178.71	QHPEWQGKVVLVQIAN	VQIANPARGRGKDVKE	375	385	yes	no	2	0.0016478		K	V	V	A	R	G	2	1	1	0	0	1	0	0	0	1	1	0	0	0	1	0	0	0	0	3	0	0	16616000	0	0	0	5569200	3533700
A5AY88	tr|A5AY88|A5AY88_VITVI	LGFFLHSPFPSSEIYR	16	13	110.97	1895.96	RKRFNRVKLGFFLHSP	FPSSEIYRTLPIREEL	228	243	no	no	2;3	4.3398e-17		K	L	G	Y	R	T	0	1	0	0	0	0	1	1	1	1	2	0	0	3	2	3	0	0	1	0	0	0	50970000	0	0	0	4942600	1875800
A5AZG2	tr|A5AZG2|A5AZG2_VITVI	ALPSESDEHPKIYR	14	1	36.292	1640.82	HQYQVVGRALPSESDE	DEHPKIYRMKLWATNE	15	28	yes	yes	3	0.028178		R	A	L	Y	R	M	1	1	0	1	0	0	2	0	1	1	1	1	0	0	2	2	0	0	1	0	0	1	59912000	0	0	0	9227000	12764000
A5AZG2	tr|A5AZG2|A5AZG2_VITVI	DTTLNGAVEQMYAEMASR	18	6	53.453	1985.88	HNMYKEYRDTTLNGAV	MYAEMASRHRVRSPCI	98	115	yes	no	2	0.001158		R	D	T	S	R	H	3	1	1	1	0	1	2	1	0	0	1	0	2	0	0	1	2	0	1	1	0	0	24486000	0	0	0	4132600	4096900
A5AZG2	tr|A5AZG2|A5AZG2_VITVI	FHQYQVVGR	9	17	105.14	1132.58	________________	HQYQVVGRALPSESDE	6	14	yes	no	2;3	0.0002018		R	F	H	G	R	A	0	1	0	0	0	2	0	1	1	0	0	0	0	1	0	0	0	0	1	2	0	0	350000000	27924000	29607000	14731000	12238000	13703000
A5AZG2	tr|A5AZG2|A5AZG2_VITVI	LWATNEVR	8	14	80.438	987.514	HPKIYRMKLWATNEVR	LWATNEVRAKSKFWYF	31	38	yes	no	2	0.0078543		K	L	W	V	R	A	1	1	1	0	0	0	1	0	0	0	1	0	0	0	0	0	1	1	0	1	0	0	222960000	5443600	10292000	0	22879000	20258000
A5AZG2	tr|A5AZG2|A5AZG2_VITVI	NYGIWLR	7	6	101.21	920.487	EKNPTTIKNYGIWLRY	KNYGIWLRYQSRTGYH	76	82	yes	no	2	0.014982		K	N	Y	L	R	Y	0	1	1	0	0	0	0	1	0	1	1	0	0	0	0	0	0	1	1	0	0	0	203200000	2875000	3272500	2866700	28592000	20987000
A5B0L5	tr|A5B0L5|A5B0L5_VITVI	DSGGFEALVTGK	12	6	89.433	1179.58	ESLLLAFKDSGGFEAL	FEALVTGKTTEMQSID	95	106	yes	yes	2	0.00012877		K	D	S	G	K	T	1	0	0	1	0	0	1	3	0	0	1	1	0	1	0	1	1	0	0	1	0	0	35684000	2990300	0	2857900	0	11975000
A5B0L5	tr|A5B0L5|A5B0L5_VITVI	DTTGIPEVLSR	11	10	85.813	1186.62	DEEILILRDTTGIPEV	GIPEVLSRLDVPPSTM	287	297	yes	yes	2	0.00050756		R	D	T	S	R	L	0	1	0	1	0	0	1	1	0	1	1	0	0	0	1	1	2	0	0	1	0	0	100290000	3281800	3053300	2451000	23710000	24698000
A5B0L5	tr|A5B0L5|A5B0L5_VITVI	FLFQIFPSALAHLSK	15	4	79.652	1717.96	KPGSLAARFLFQIFPS	SALAHLSKVDVVIKDS	158	172	yes	yes	3	4.9474e-05		R	F	L	S	K	V	2	0	0	0	0	1	0	0	1	1	3	1	0	3	1	2	0	0	0	0	0	0	16752000	0	0	0	0	3591400
A5B0L5	tr|A5B0L5|A5B0L5_VITVI	GAFGQAVSTAQQLPVPVK	18	9	102.08	1796.98	ESVPEQLKGAFGQAVS	QQLPVPVKDAISSGLK	237	254	yes	yes	2	1.2017e-14		K	G	A	V	K	D	3	0	0	0	0	3	0	2	0	0	1	1	0	1	2	1	1	0	0	3	0	0	53546000	911320	0	2042400	21707000	6570400
A5B0L5	tr|A5B0L5|A5B0L5_VITVI	LKEEYVEAVLESPK	14	28	172.91	1632.86	LSVEGPLRLKEEYVEA	EAVLESPKVVEESVPE	212	225	yes	yes	2;3	1.2351e-63		R	L	K	P	K	V	1	0	0	0	0	0	4	0	0	0	2	2	0	0	1	1	0	0	1	2	0	1	497670000	8294500	11002000	8993700	71434000	99590000
A5B0L5	tr|A5B0L5|A5B0L5_VITVI	LSVEGPLR	8	20	135.77	869.497	SKIVLNSRLSVEGPLR	LSVEGPLRLKEEYVEA	204	211	yes	yes	2	0.00017638		R	L	S	L	R	L	0	1	0	0	0	0	1	1	0	0	2	0	0	0	1	1	0	0	0	1	0	0	786250000	25832000	33214000	15910000	160870000	157360000
A5B0L5	tr|A5B0L5|A5B0L5_VITVI	PTTSPYLEGQWNLEWFGTGKPGSLAAR	27	21	176.09	2962.46	ERLNPTPRPTTSPYLE	KPGSLAARFLFQIFPS	131	157	yes	yes	3	7.5722e-163		R	P	T	A	R	F	2	1	1	0	0	1	2	4	0	0	3	1	0	1	3	2	3	2	1	0	0	1	286410000	0	0	0	45352000	25600000
A5B0L5	tr|A5B0L5|A5B0L5_VITVI	TTEMQSIDVNER	12	27	199.8	1421.65	FEALVTGKTTEMQSID	QSIDVNERITGLERLN	107	118	yes	yes	2	2.4002e-81	180	K	T	T	E	R	I	0	1	1	1	0	1	2	0	0	1	0	0	1	0	0	1	2	0	0	1	0	0	469730000	10601000	16951000	13699000	97155000	76565000
A5B0L5	tr|A5B0L5|A5B0L5_VITVI	VVEESVPEQLK	11	24	99.752	1255.67	EAVLESPKVVEESVPE	ESVPEQLKGAFGQAVS	226	236	yes	yes	2	0.00016427		K	V	V	L	K	G	0	0	0	0	0	1	3	0	0	0	1	1	0	0	1	1	0	0	0	3	0	0	344150000	14876000	16196000	11278000	57646000	51028000
A5B0V8	tr|A5B0V8|A5B0V8_VITVI	HYFNNTDGLIYVVDSLDR	18	4	48.376	2140.02	EKLRPLWRHYFNNTDG	YVVDSLDRERIGKAKA	80	97	yes	yes	3	0.00046233		R	H	Y	D	R	E	0	1	2	3	0	0	0	1	1	1	2	0	0	1	0	1	1	0	2	2	0	0	42584000	0	0	0	12432000	3204100
A5B0V8	tr|A5B0V8|A5B0V8_VITVI	HYFNNTDGLIYVVDSLDRER	20	1	30.945	2425.17	EKLRPLWRHYFNNTDG	VDSLDRERIGKAKAEF	80	99	yes	yes	3	0.0039633		R	H	Y	E	R	I	0	2	2	3	0	0	1	1	1	1	2	0	0	1	0	1	1	0	2	2	0	1	0	0	0	0	0	0
A5B0V8	tr|A5B0V8|A5B0V8_VITVI	NVMFTVWDVGGQEK	14	0	51.03	1608.76	NVEKVQYKNVMFTVWD	WDVGGQEKLRPLWRHY	60	73	yes	yes	2	0.016133		K	N	V	E	K	L	0	0	1	1	0	1	1	2	0	0	0	1	1	1	0	0	1	1	0	3	0	0	15350000	0	0	0	0	0
A5B118	tr|A5B118|A5B118_VITVI	ALNDHHVLLEGTLLKPNMVTPGSEAK	26	3	121.91	2783.46	RVLAACYKALNDHHVL	VTPGSEAKKVSPEVVA	211	236	yes	yes	4	7.3781e-63	181	K	A	L	A	K	K	2	0	2	1	0	0	2	2	2	0	5	2	1	0	2	1	2	0	0	2	0	1	60068000	0	0	0	10657000	0
A5B118	tr|A5B118|A5B118_VITVI	EGGVLPGIK	9	13	56.432	868.502	KPFVDVMKEGGVLPGI	GGVLPGIKVDKGTVVL	95	103	yes	yes	2	0.020187		K	E	G	I	K	V	0	0	0	0	0	0	1	3	0	1	1	1	0	0	1	0	0	0	0	1	0	0	1003100000	0	0	11668000	0	0
A5B118	tr|A5B118|A5B118_VITVI	GTVVLTGTDGETTTQGLDGLGER	23	54	226.71	2276.11	LPGIKVDKGTVVLTGT	GLDGLGERCAKYYAAG	107	129	yes	yes	2;3	5.693e-263		K	G	T	E	R	C	0	1	0	2	0	1	2	6	0	0	3	0	0	0	0	0	6	0	0	2	0	0	791560000	4798200	8516300	5933100	123990000	117690000
A5B118	tr|A5B118|A5B118_VITVI	IGPTEPSELAIHENAYGLAR	20	64	250.86	2137.08	AKWRAVLKIGPTEPSE	ENAYGLARYAMICQEN	149	168	yes	yes	2;3	3.2421e-297		K	I	G	A	R	Y	3	1	1	0	0	0	3	2	1	2	2	0	0	0	2	1	1	0	1	0	0	0	3199300000	26973000	77558000	32860000	429030000	356090000
A5B118	tr|A5B118|A5B118_VITVI	KPWNLSFSFGR	11	1	59.116	1337.69	AMNKLKGKKPWNLSFS	NLSFSFGRALQQSTLK	288	298	yes	yes	2	0.024019		K	K	P	G	R	A	0	1	1	0	0	0	0	1	0	0	1	1	0	2	1	2	0	1	0	0	0	1	29907000	0	0	0	0	0
A5B118	tr|A5B118|A5B118_VITVI	KVSPEVVAEYTVR	13	27	107.53	1475.8	VTPGSEAKKVSPEVVA	VVAEYTVRTLQRTVPA	237	249	yes	yes	2;3	1.0491e-07		K	K	V	V	R	T	1	1	0	0	0	0	2	0	0	0	0	1	0	0	1	1	1	0	1	4	0	1	541100000	3807200	2307200	980620	59998000	44298000
A5B118	tr|A5B118|A5B118_VITVI	LASINVENVEGNR	13	25	229.97	1413.72	STGTIGKRLASINVEN	VENVEGNRRALRELLF	40	52	yes	yes	2	1.8024e-148		R	L	A	N	R	R	1	1	3	0	0	0	2	1	0	1	1	0	0	0	0	1	0	0	0	2	0	0	1350900000	19431000	17677000	13762000	148480000	114510000
A5B118	tr|A5B118|A5B118_VITVI	LASINVENVEGNRR	14	46	241.27	1569.82	STGTIGKRLASINVEN	ENVEGNRRALRELLFC	40	53	yes	yes	2;3	1.8007e-209		R	L	A	R	R	A	1	2	3	0	0	0	2	1	0	1	1	0	0	0	0	1	0	0	0	2	0	1	2425100000	31727000	26592000	20365000	284320000	206540000
A5B118	tr|A5B118|A5B118_VITVI	LGEGAAESLHVK	12	11	98.368	1209.64	GTYKGDAKLGEGAAES	AAESLHVKDYKY____	343	354	yes	yes	2;3	4.0759e-05		K	L	G	V	K	D	2	0	0	0	0	0	2	2	1	0	2	1	0	0	0	1	0	0	0	1	0	0	73157000	0	0	0	27422000	9247500
A5B118	tr|A5B118|A5B118_VITVI	PFVDVMK	7	28	104.45	834.431	YQKTASGKPFVDVMKE	KPFVDVMKEGGVLPGI	88	94	yes	yes	2	0.0071727	182	K	P	F	M	K	E	0	0	0	1	0	0	0	0	0	0	0	1	1	1	1	0	0	0	0	2	0	0	476230000	1856400	2092200	3280800	46156000	39952000
A5B118	tr|A5B118|A5B118_VITVI	RLASINVENVEGNR	14	3	42.947	1569.82	ESTGTIGKRLASINVE	VENVEGNRRALRELLF	39	52	yes	yes	3	0.0017557		K	R	L	N	R	R	1	2	3	0	0	0	2	1	0	1	1	0	0	0	0	1	0	0	0	2	0	1	38445000	0	0	0	0	0
A5B118	tr|A5B118|A5B118_VITVI	TASGKPFVDVMK	12	37	145.52	1278.66	FEETLYQKTASGKPFV	KPFVDVMKEGGVLPGI	83	94	yes	yes	2;3	2.8329e-20	182	K	T	A	M	K	E	1	0	0	1	0	0	0	1	0	0	0	2	1	1	1	1	1	0	0	2	0	1	637090000	6564000	11486000	7874800	73691000	57617000
A5B118	tr|A5B118|A5B118_VITVI	TVPAAVPAIVFLSGGQSEEEATLNLNAMNK	30	4	73.676	3070.56	YTVRTLQRTVPAAVPA	LNLNAMNKLKGKKPWN	254	283	yes	yes	3	3.5187e-29		R	T	V	N	K	L	5	0	3	0	0	1	3	2	0	1	3	1	1	1	2	2	2	0	0	3	0	0	61626000	0	0	764890	0	0
A5B118	tr|A5B118|A5B118_VITVI	VSPEVVAEYTVR	12	44	165.07	1347.7	TPGSEAKKVSPEVVAE	VVAEYTVRTLQRTVPA	238	249	yes	yes	2;3	7.2163e-35		K	V	S	V	R	T	1	1	0	0	0	0	2	0	0	0	0	0	0	0	1	1	1	0	1	4	0	0	720580000	8020000	8190200	6217100	124340000	112640000
A5B118	tr|A5B118|A5B118_VITVI	YHDELIANAAYIGTPGK	17	15	199.01	1831.91	________________	AYIGTPGKGILAADES	8	24	yes	yes	2;3	3.8156e-137		K	Y	H	G	K	G	3	0	1	1	0	0	1	2	1	2	1	1	0	0	1	0	1	0	2	0	0	0	152210000	0	0	577510	12485000	8880800
A5B118	tr|A5B118|A5B118_VITVI	GILAADESTGTIGK	14	23	143.98	1331.69	AYIGTPGKGILAADES	ESTGTIGKRLASINVE	25	38	yes	no	2	1.8051e-36		K	G	I	G	K	R	2	0	0	1	0	0	1	3	0	2	1	1	0	0	0	1	2	0	0	0	0	0	883470000	6260900	8294000	5421000	63818000	48101000
A5B118	tr|A5B118|A5B118_VITVI	GILAADESTGTIGKR	15	11	146.96	1487.79	AYIGTPGKGILAADES	STGTIGKRLASINVEN	25	39	yes	no	2;3	1.0307e-46		K	G	I	K	R	L	2	1	0	1	0	0	1	3	0	2	1	1	0	0	0	1	2	0	0	0	0	1	156900000	0	0	0	0	8961500
A5B1B3	tr|A5B1B3|A5B1B3_VITVI	GQTVLYVGDLSYADDYPFHDNVR	23	3	89.721	2643.22	HYELSPIKGQTVLYVG	YPFHDNVRWDTWGRFT	187	209	yes	yes	3	5.1758e-34		K	G	Q	V	R	W	1	1	1	4	0	1	0	2	1	0	2	0	0	1	1	1	1	0	3	3	0	0	24649000	2378400	3465200	0	7580500	0
A5B1B3	tr|A5B1B3|A5B1B3_VITVI	NQDAYAVEADSVWLQNR	17	3	87.429	1977.92	HAYFGWNRNQDAYAVE	DSVWLQNRYWTSSEKS	438	454	yes	yes	2	1.2607e-12		R	N	Q	N	R	Y	3	1	2	2	0	2	1	0	0	0	1	0	0	0	0	1	0	1	1	2	0	0	25137000	1157600	3528500	2911500	9499900	0
A5B1B3	tr|A5B1B3|A5B1B3_VITVI	TLTHYELSPIK	11	3	85.813	1300.7	GQTYHSNRTLTHYELS	HYELSPIKGQTVLYVG	176	186	yes	yes	2;3	0.00050756		R	T	L	I	K	G	0	0	0	0	0	0	1	0	1	1	2	1	0	0	1	1	2	0	1	0	0	0	49360000	5026100	5179300	5317100	6214600	9833800
A5B1B3	tr|A5B1B3|A5B1B3_VITVI	QFWFVTPPR	9	19	128.27	1176.61	VGIGNSTRQFWFVTPP	FWFVTPPRAGPDVPYT	144	152	yes	no	2	7.5633e-05		R	Q	F	P	R	A	0	1	0	0	0	1	0	0	0	0	0	0	0	2	2	0	1	1	0	1	0	0	78846000	0	5373600	4109400	15835000	0
A5B1D3	tr|A5B1D3|A5B1D3_VITVI	EFPGQVLR	8	12	75.243	944.508	KWNPSKEREFPGQVLR	EFPGQVLRYEDNFDSN	115	122	yes	yes	2	0.0095255		R	E	F	L	R	Y	0	1	0	0	0	1	1	1	0	0	1	0	0	1	1	0	0	0	0	1	0	0	224590000	7516500	8309300	6555900	61406000	52251000
A5B1D3	tr|A5B1D3|A5B1D3_VITVI	SITDYGSPEEFLSK	14	13	101.2	1571.74	IITPTDKKSITDYGSP	SPEEFLSKVDFLLGKQ	144	157	yes	yes	2	2.6966e-08		K	S	I	S	K	V	0	0	0	1	0	0	2	1	0	1	1	1	0	1	1	3	1	0	1	0	0	0	80022000	3700900	3945200	3927100	24762000	13160000
A5B1D3	tr|A5B1D3|A5B1D3_VITVI	VDFLLGK	7	4	69.176	790.459	SPEEFLSKVDFLLGKQ	KVDFLLGKQAFFGNAN	158	164	yes	yes	2	0.045465		K	V	D	G	K	Q	0	0	0	1	0	0	0	1	0	0	2	1	0	1	0	0	0	0	0	1	0	0	54648000	4642500	2980500	1932800	13871000	6218600
A5B1D3	tr|A5B1D3|A5B1D3_VITVI	YEDNFDSNSNVSVIITPTDK	20	0	75.533	2257.04	EFPGQVLRYEDNFDSN	VIITPTDKKSITDYGS	123	142	yes	yes	2	7.5714e-10		R	Y	E	D	K	K	0	0	3	3	0	0	1	0	0	2	0	1	0	1	1	3	2	0	1	2	0	0	16421000	1579300	2171500	0	0	6408000
A5B1D3	tr|A5B1D3|A5B1D3_VITVI	YEDNFDSNSNVSVIITPTDKK	21	12	120.23	2385.13	EFPGQVLRYEDNFDSN	IITPTDKKSITDYGSP	123	143	yes	yes	3	7.6341e-43		R	Y	E	K	K	S	0	0	3	3	0	0	1	0	0	2	0	2	0	1	1	3	2	0	1	2	0	1	55677000	2807800	0	1932800	13009000	13068000
A5B2Z7	tr|A5B2Z7|A5B2Z7_VITVI	EVLGFFR	7	16	117.7	866.465	RNVETTPKEVLGFFRD	KEVLGFFRDMALMRRM	67	73	yes	yes	2	0.014203		K	E	V	F	R	D	0	1	0	0	0	0	1	1	0	0	1	0	0	2	0	0	0	0	0	1	0	0	109580000	0	0	0	13077000	15232000
A5B2Z7	tr|A5B2Z7|A5B2Z7_VITVI	MEIASDSLYK	10	1	48.188	1155.55	RDMALMRRMEIASDSL	IASDSLYKSKLIRGFC	81	90	yes	no	2	0.0089011	183	R	M	E	Y	K	S	1	0	0	1	0	0	1	0	0	1	1	1	1	0	0	2	0	0	1	0	0	0	0	0	0	0	0	0
A5B2Z7	tr|A5B2Z7|A5B2Z7_VITVI	NGPIILEMDTYR	12	2	58.32	1420.7	FAKEHALKNGPIILEM	ILEMDTYRYHGHSMSD	285	296	yes	no	2	0.0011113		K	N	G	Y	R	Y	0	1	1	1	0	0	1	1	0	2	1	0	1	0	1	0	1	0	1	0	0	0	6423700	0	0	0	0	0
A5B2Z7	tr|A5B2Z7|A5B2Z7_VITVI	RMEIASDSLYK	11	1	61.235	1311.65	FRDMALMRRMEIASDS	IASDSLYKSKLIRGFC	80	90	yes	no	2	0.019216		R	R	M	Y	K	S	1	1	0	1	0	0	1	0	0	1	1	1	1	0	0	2	0	0	1	0	0	1	25139000	0	0	0	6016200	5295500
A5B3G3	tr|A5B3G3|A5B3G3_VITVI	YRPGTVALR	9	6	142	1031.59	GGVKKPHRYRPGTVAL	RPGTVALREIRKYQKS	42	50	no	no	2	1.2762e-08		R	Y	R	L	R	E	1	2	0	0	0	0	0	1	0	0	1	0	0	0	1	0	1	0	1	1	0	1	180560000	5193700	8759100	4107300	0	0
A5B3G3	tr|A5B3G3|A5B3G3_VITVI	STELLIR	7	17	132.09	830.486	REIRKYQKSTELLIRK	KSTELLIRKLPFQRLV	58	64	yes	no	2	0.006748		K	S	T	I	R	K	0	1	0	0	0	0	1	0	0	1	2	0	0	0	0	1	1	0	0	0	0	0	323920000	0	7650300	5461900	24482000	21558000
A5B3K2	tr|A5B3K2|A5B3K2_VITVI	EATEAVAAAAEPAKP	15	4	107.97	1424.71	VAVMVEEREATEAVAA	AAAEPAKP________	176	190	yes	yes	2	9.6004e-25		R	E	A	K	P	-	7	0	0	0	0	0	3	0	0	0	0	1	0	0	2	0	1	0	0	1	0	1	19090000	0	0	1357400	8942400	8790200
A5B3K2	tr|A5B3K2|A5B3K2_VITVI	FLDELVK	7	17	117.16	862.48	KNSTAVQKFLDELVKI	KFLDELVKIEFPGSKA	87	93	yes	yes	2	0.007944		K	F	L	V	K	I	0	0	0	1	0	0	1	0	0	0	2	1	0	1	0	0	0	0	0	1	0	0	165330000	2855300	2505500	1926600	22450000	0
A5B3K2	tr|A5B3K2|A5B3K2_VITVI	IEFPGSK	7	3	75.109	776.407	KFLDELVKIEFPGSKA	KIEFPGSKAVCEASSK	94	100	yes	yes	2	0.036964		K	I	E	S	K	A	0	0	0	0	0	0	1	1	0	1	0	1	0	1	1	1	0	0	0	0	0	0	91107000	3139700	0	0	26356000	14809000
A5B3K2	tr|A5B3K2|A5B3K2_VITVI	SFDDSKEEINKDFEAK	16	1	50.722	1900.87	TAAAEACKSFDDSKEE	INKDFEAKKDELQPKV	32	47	yes	yes	3	0.0082785		K	S	F	A	K	K	1	0	1	3	0	0	3	0	0	1	0	3	0	2	0	2	0	0	0	0	0	2	33865000	0	0	0	0	0
A5B3K2	tr|A5B3K2|A5B3K2_VITVI	YGPGLVSGPVLFLFEK	16	19	106.35	1721.94	AVCEASSKYGPGLVSG	PVLFLFEKVSTFIVTE	109	124	yes	yes	2	1.2862e-11		K	Y	G	E	K	V	0	0	0	0	0	0	1	3	0	0	3	1	0	2	2	1	0	0	1	2	0	0	139360000	1607100	2060200	652250	16083000	11894000
A5B3K9	tr|A5B3K9|A5B3K9_VITVI	AHGLAPEIPEDLYHLIK	17	20	102.63	1915.02	SKILRILKAHGLAPEI	EDLYHLIKKAVAIRKH	77	93	yes	yes	2;3;4	7.2788e-15		K	A	H	I	K	K	2	0	0	1	0	0	2	1	2	2	3	1	0	0	2	0	0	0	1	0	0	0	804450000	0	0	0	49589000	3121300
A5B3K9	tr|A5B3K9|A5B3K9_VITVI	GMTPSQIGVILR	12	9	94.767	1270.71	NICKFAKKGMTPSQIG	SQIGVILRDSHGIAQV	44	55	yes	yes	2	7.37e-05	185	K	G	M	L	R	D	0	1	0	0	0	1	0	2	0	2	1	0	1	0	1	1	1	0	0	1	0	0	145000000	2351800	2784400	2878100	30926000	27188000
A5B3K9	tr|A5B3K9|A5B3K9_VITVI	LILVESR	7	37	146.21	828.507	KDKDSKFRLILVESRI	RLILVESRIHRLARYY	115	121	no	no	2	0.00038503		R	L	I	S	R	I	0	1	0	0	0	0	1	0	0	1	2	0	0	0	0	1	0	0	0	1	0	0	1320900000	23901000	25828000	21142000	114140000	123240000
A5B427	tr|A5B427|A5B427_VITVI	EFESDYAGFTEDGAR	15	59	209.39	1692.69	DRKLMFKKEFESDYAG	GFTEDGARWLVENTDI	181	195	yes	yes	2	4.1752e-138		K	E	F	A	R	W	2	1	0	2	0	0	3	2	0	0	0	0	0	2	0	1	1	0	1	0	0	0	1170700000	51376000	49685000	46446000	209180000	171280000
A5B427	tr|A5B427|A5B427_VITVI	EVILVESLK	9	29	121.05	1028.61	HLPFLEGREVILVESL	VILVESLKLDDVPAGM	231	239	yes	yes	1;2	0.00031448		R	E	V	L	K	L	0	0	0	0	0	0	2	0	0	1	2	1	0	0	0	1	0	0	0	2	0	0	1502800000	82056000	63499000	67505000	245790000	398610000
A5B427	tr|A5B427|A5B427_VITVI	IFDITHPYTPNMPTFGTDEGIGEVIWLEK	29	24	155.8	3319.61	REVYADGRIFDITHPY	GEVIWLEKSMKNGSIT	57	85	yes	yes	3;4	9.8183e-138	186	R	I	F	E	K	S	0	0	1	2	0	0	3	3	1	4	1	1	1	2	3	0	4	1	1	1	0	0	658660000	11215000	19060000	8454100	119540000	105480000
A5B427	tr|A5B427|A5B427_VITVI	KEFESDYAGFTEDGAR	16	26	154.49	1820.79	TDRKLMFKKEFESDYA	GFTEDGARWLVENTDI	180	195	yes	yes	2;3	1.7019e-55		K	K	E	A	R	W	2	1	0	2	0	0	3	2	0	0	0	1	0	2	0	1	1	0	1	0	0	1	304650000	20368000	20446000	13813000	44199000	35764000
A5B427	tr|A5B427|A5B427_VITVI	LPGAEGAPIR	10	30	161.44	979.545	NVHCLHLRLPGAEGAP	GAEGAPIRCILIK___	257	266	yes	yes	2	2.0438e-25		R	L	P	I	R	C	2	1	0	0	0	0	1	2	0	1	1	0	0	0	2	0	0	0	0	0	0	0	2216500000	158070000	173030000	120870000	401230000	331140000
A5B427	tr|A5B427|A5B427_VITVI	LVGIDYVSVATYDHIVSAHLPFLEGR	26	14	148.09	2870.5	LVENTDIKLVGIDYVS	HLPFLEGREVILVESL	205	230	yes	yes	3;4	4.7845e-105		K	L	V	G	R	E	2	1	0	2	0	0	1	2	2	2	3	0	0	1	1	2	1	0	2	4	0	0	133190000	0	0	0	41327000	24966000
A5B427	tr|A5B427|A5B427_VITVI	WLVENTDIK	9	23	108.57	1116.58	GFTEDGARWLVENTDI	LVENTDIKLVGIDYVS	196	204	yes	yes	2	0.00034709		R	W	L	I	K	L	0	0	1	1	0	0	1	0	0	1	1	1	0	0	0	0	1	1	0	1	0	0	1409000000	0	0	87733000	200480000	218820000
A5B473	tr|A5B473|A5B473_VITVI	ADQLTDDQISEFK	13	7	66.246	1508.7	________________	DDQISEFKEAFSLFDK	2	14	yes	no	2	0.00040338		M	A	D	F	K	E	1	0	0	3	0	2	1	0	0	1	1	1	0	1	0	1	1	0	0	0	0	0	52350000	1213700	0	0	10541000	8254100
A5B473	tr|A5B473|A5B473_VITVI	EADVDGDGQINYEEFVK	17	1	44.998	1926.85	EEVDEMIREADVDGDG	INYEEFVKVMMAK___	128	144	yes	no	2	0.0059065		R	E	A	V	K	V	1	0	1	3	0	1	3	2	0	1	0	1	0	1	0	0	0	0	1	2	0	0	14704000	0	0	0	3964200	0
A5B4J3	tr|A5B4J3|A5B4J3_VITVI	DAVTYTEHAR	10	1	72.2	1161.54	IFLENVIRDAVTYTEH	VTYTEHARRKTVTAMD	69	78	yes	yes	2	0.0025332		R	D	A	A	R	R	2	1	0	1	0	0	1	0	1	0	0	0	0	0	0	0	2	0	1	1	0	0	0	0	0	0	0	0
A5B4J3	tr|A5B4J3|A5B4J3_VITVI	DNIQGITKPAIR	12	46	216.83	1324.75	KRHRKVLRDNIQGITK	GITKPAIRRLARRGGV	25	36	yes	yes	2;3	6.042e-114		R	D	N	I	R	R	1	1	1	1	0	1	0	1	0	3	0	1	0	0	1	0	1	0	0	0	0	1	952630000	9077900	9517100	10395000	50649000	42834000
A5B4J3	tr|A5B4J3|A5B4J3_VITVI	IFLENVIR	8	23	181.49	1002.59	EETRGVLKIFLENVIR	IFLENVIRDAVTYTEH	61	68	yes	yes	2	1.9792e-30		K	I	F	I	R	D	0	1	1	0	0	0	1	0	0	2	1	0	0	1	0	0	0	0	0	1	0	0	268810000	0	0	0	19228000	8521100
A5B4J3	tr|A5B4J3|A5B4J3_VITVI	ISGLIYEETR	10	16	126.33	1179.61	ARRGGVKRISGLIYEE	GLIYEETRGVLKIFLE	47	56	yes	yes	2	1.5024e-07		R	I	S	T	R	G	0	1	0	0	0	0	2	1	0	2	1	0	0	0	0	1	1	0	1	0	0	0	490510000	4126800	4498900	5014300	43421000	33357000
A5B4J3	tr|A5B4J3|A5B4J3_VITVI	TVTAMDVVYALK	12	12	95.094	1309.7	YTEHARRKTVTAMDVV	MDVVYALKRQGRTLYG	81	92	yes	yes	2	7.0712e-05	187	K	T	V	L	K	R	2	0	0	1	0	0	0	0	0	0	1	1	1	0	0	0	2	0	1	3	0	0	128340000	212180	0	0	7630200	0
A5B4J3	tr|A5B4J3|A5B4J3_VITVI	TVTAMDVVYALKR	13	1	51.726	1465.8	YTEHARRKTVTAMDVV	DVVYALKRQGRTLYGF	81	93	yes	yes	2	0.023909		K	T	V	K	R	Q	2	1	0	1	0	0	0	0	0	0	1	1	1	0	0	0	2	0	1	3	0	1	959450	0	0	0	0	0
A5B4N7	tr|A5B4N7|A5B4N7_VITVI	DHPYDPAHDSVLSR	14	6	85.493	1607.73	AILEIPSKDHPYDPAH	AHDSVLSRVKYLFSAE	102	115	yes	yes	2;3	4.7383e-05		K	D	H	S	R	V	1	1	0	3	0	0	0	0	2	0	1	0	0	0	2	2	0	0	1	1	0	0	176150000	0	0	0	17092000	13075000
A5B4N7	tr|A5B4N7|A5B4N7_VITVI	EDIAIILISQYVANMIR	17	2	84.046	1961.07	AFKEFTTKEDIAIILI	QYVANMIRFLVDSYNK	66	82	yes	yes	2;3	1.9115e-07	188	K	E	D	I	R	F	2	1	1	1	0	1	1	0	0	5	1	0	1	0	0	1	0	0	1	1	0	0	66781000	0	0	0	55610000	0
A5B4N7	tr|A5B4N7|A5B4N7_VITVI	FLVDSYNKPVPAILEIPSK	19	14	81.357	2129.18	QYVANMIRFLVDSYNK	AILEIPSKDHPYDPAH	83	101	yes	yes	3	9.5594e-10		R	F	L	S	K	D	1	0	1	1	0	0	1	0	0	2	2	2	0	1	3	2	0	0	1	2	0	1	85823000	0	1587700	0	12281000	2542000
A5B4N7	tr|A5B4N7|A5B4N7_VITVI	KTNYLIVDSK	10	16	124.38	1179.65	VGNVDLRRKTNYLIVD	NYLIVDSKTTVKQIED	40	49	yes	yes	2;3	7.6694e-07		R	K	T	S	K	T	0	0	1	1	0	0	0	0	0	1	1	2	0	0	0	1	1	0	1	1	0	1	86115000	0	0	0	15331000	9505400
A5B4N7	tr|A5B4N7|A5B4N7_VITVI	TNYLIVDSK	9	6	84.738	1051.56	GNVDLRRKTNYLIVDS	NYLIVDSKTTVKQIED	41	49	yes	yes	2	0.0041333		K	T	N	S	K	T	0	0	1	1	0	0	0	0	0	1	1	1	0	0	0	1	1	0	1	1	0	0	172960000	2067900	0	1301600	16542000	15814000
A5B513	tr|A5B513|A5B513_VITVI	MADSMSDFVESR	12	25	120.84	1373.56	MEQGDISRMADSMSDF	MSDFVESRTKLSVGPI	158	169	yes	yes	2	3.2538e-12	189;190	R	M	A	S	R	T	1	1	0	2	0	0	1	0	0	0	0	0	2	1	0	3	0	0	0	1	0	0	164080000	0	1762400	0	13530000	9839900
A5B513	tr|A5B513|A5B513_VITVI	SEFGLLASSFISNNK	15	1	75.911	1612.81	ELNLQGLRSEFGLLAS	SSFISNNKDSPSASKL	87	101	yes	yes	2	0.00045138		R	S	E	N	K	D	1	0	2	0	0	0	1	1	0	1	2	1	0	2	0	4	0	0	0	0	0	0	7721000	0	0	0	0	0
A5B513	tr|A5B513|A5B513_VITVI	SLKDSEQMEQGDISR	15	4	59.634	1721.79	RLVGPDVKSLKDSEQM	MEQGDISRMADSMSDF	143	157	yes	yes	3	0.00086409		K	S	L	S	R	M	0	1	0	2	0	2	2	1	0	1	1	1	1	0	0	3	0	0	0	0	0	1	12143000	0	0	0	0	0
A5B513	tr|A5B513|A5B513_VITVI	TGYGIHAFWPSSWN	14	0	39.815	1621.73	VVSLDNWKTGYGIHAF	AFWPSSWN________	326	339	yes	yes	2	0.040833		K	T	G	W	N	-	1	0	1	0	0	0	0	2	1	1	0	0	0	1	1	2	1	2	1	0	0	0	22863000	0	0	0	0	0
A5B513	tr|A5B513|A5B513_VITVI	VLAGQTLLHDSK	12	5	90.697	1280.71	WAPFVVKKVLAGQTLL	QTLLHDSKIWLGSAVF	206	217	yes	yes	2;3	2.3317e-05		K	V	L	S	K	I	1	0	0	1	0	1	0	1	1	0	3	1	0	0	0	1	1	0	0	1	0	0	92801000	0	0	0	6215000	0
A5B5N0	tr|A5B5N0|A5B5N0_VITVI	FDEKEWYVGK	10	3	71.153	1299.61	VEALNGKKFDEKEWYV	EKEWYVGKAQKKYERE	262	271	yes	yes	2;3	0.021497		K	F	D	G	K	A	0	0	0	1	0	0	2	1	0	0	0	2	0	1	0	0	0	1	1	1	0	1	17328000	0	0	0	0	0
A5B5N0	tr|A5B5N0|A5B5N0_VITVI	FNNVYVK	7	1	60.358	882.46	ETALNKTKFNNVYVKN	KFNNVYVKNLSESTTE	196	202	no	no	2	0.068432		K	F	N	V	K	N	0	0	2	0	0	0	0	0	0	0	0	1	0	1	0	0	0	0	1	2	0	0	14971000	2071300	0	0	0	0
A5B5N0	tr|A5B5N0|A5B5N0_VITVI	GSGFVAFSTSEEASR	15	13	97.45	1530.7	RDPSGISRGSGFVAFS	STSEEASRALTEMNGK	341	355	yes	yes	2	2.1496e-07		R	G	S	S	R	A	2	1	0	0	0	0	2	2	0	0	0	0	0	2	0	4	1	0	0	1	0	0	46231000	0	1671800	2152300	10005000	3238700
A5B5N0	tr|A5B5N0|A5B5N0_VITVI	NLSESTTEEDLK	12	1	32.61	1364.63	KFNNVYVKNLSESTTE	STTEEDLKNIFGEFGI	203	214	yes	yes	2	0.023864		K	N	L	L	K	N	0	0	1	1	0	0	3	0	0	0	2	1	0	0	0	2	2	0	0	0	0	0	346320000	0	0	0	0	0
A5B5N0	tr|A5B5N0|A5B5N0_VITVI	QVYVGQFLR	9	10	100.02	1108.6	NGMLINDKQVYVGQFL	VYVGQFLRKQERETAL	175	183	yes	yes	2	0.0019266		K	Q	V	L	R	K	0	1	0	0	0	2	0	1	0	0	1	0	0	1	0	0	0	0	1	2	0	0	120010000	0	0	0	17984000	13244000
A5B5N0	tr|A5B5N0|A5B5N0_VITVI	SLGYGYVNYSNPQDAAR	17	26	133.28	1873.86	CRDLSTRRSLGYGYVN	SNPQDAARALDLLNFT	58	74	yes	yes	2	2.3058e-37		R	S	L	A	R	A	2	1	2	1	0	1	0	2	0	0	1	0	0	0	1	2	0	0	3	1	0	0	122120000	3557500	3765300	4309500	25229000	15814000
A5B5N0	tr|A5B5N0|A5B5N0_VITVI	MVVSKPLYVALAQR	14	5	83.204	1573.9	ALTEMNGKMVVSKPLY	LYVALAQRKEERRARL	364	377	no	no	3	0.00043904	191	K	M	V	Q	R	K	2	1	0	0	0	1	0	0	0	0	2	1	1	0	1	1	0	0	1	3	0	1	34264000	0	0	0	0	0
A5B5N0	tr|A5B5N0|A5B5N0_VITVI	PLYVALAQR	9	2	60.91	1029.6	NGKMVVSKPLYVALAQ	LYVALAQRKEERRARL	369	377	no	no	2	0.014853		K	P	L	Q	R	K	2	1	0	0	0	1	0	0	0	0	2	0	0	0	1	0	0	0	1	1	0	0	55969000	0	1356800	0	6775200	2968500
A5B6Y0	tr|A5B6Y0|A5B6Y0_VITVI	FGGNLNFYR	9	16	149.65	1086.52	GIDFNGARFGGNLNFY	GGNLNFYRFIRFLPDI	130	138	yes	yes	2	1.2137e-27		R	F	G	Y	R	F	0	1	2	0	0	0	0	2	0	0	1	0	0	2	0	0	0	0	1	0	0	0	131520000	3043800	3173500	2585300	5230000	4848500
A5B6Y0	tr|A5B6Y0|A5B6Y0_VITVI	FPSLGGPLLPR	11	25	133.89	1152.67	PRLPPRPRFPSLGGPL	LGGPLLPRQPANRPGP	49	59	yes	yes	2	5.0854e-13		R	F	P	P	R	Q	0	1	0	0	0	0	0	2	0	0	3	0	0	1	3	1	0	0	0	0	0	0	107720000	588140	4015900	3521400	4897500	0
A5B6Y0	tr|A5B6Y0|A5B6Y0_VITVI	NLVLFITQELK	11	3	64.121	1316.77	RPGPLSNRNLVLFITQ	LFITQELKRNITSDPQ	72	82	yes	yes	2	0.0050944		R	N	L	L	K	R	0	0	1	0	0	1	1	0	0	1	3	1	0	1	0	0	1	0	0	1	0	0	24608000	859190	0	0	2545100	1426600
A5B6Y0	tr|A5B6Y0|A5B6Y0_VITVI	NLVLFITQELKR	12	1	46.069	1472.87	RPGPLSNRNLVLFITQ	FITQELKRNITSDPQN	72	83	yes	yes	2	0.05795		R	N	L	K	R	N	0	1	1	0	0	1	1	0	0	1	3	1	0	1	0	0	1	0	0	1	0	1	5613600	0	0	0	0	0
A5B6Y0	tr|A5B6Y0|A5B6Y0_VITVI	TWQTLTEVLFLK	12	2	89.301	1477.82	SIPQSIGRTWQTLTEV	LTEVLFLKNRLSGCLP	261	272	yes	yes	2	0.00013052		R	T	W	L	K	N	0	0	0	0	0	1	1	0	0	0	3	1	0	1	0	0	3	1	0	1	0	0	26197000	0	307950	0	0	1786800
A5B6Y0	tr|A5B6Y0|A5B6Y0_VITVI	YITLANNGFIGSIPQSIGR	19	5	86.8	2020.07	AFGNTTARYITLANNG	SIPQSIGRTWQTLTEV	242	260	yes	yes	2	3.694e-11		R	Y	I	G	R	T	1	1	2	0	0	1	0	3	0	4	1	0	0	1	1	2	1	0	1	0	0	0	23361000	0	0	0	0	0
A5B709	tr|A5B709|A5B709_VITVI	IVMELFADVTPK	12	8	73.881	1361.73	VGKMKAGRIVMELFAD	LFADVTPKTAENFRAL	20	31	yes	yes	2	0.00018295	192	R	I	V	P	K	T	1	0	0	1	0	0	1	0	0	1	1	1	1	1	1	0	1	0	0	2	0	0	26679000	0	0	0	0	0
A5B709	tr|A5B709|A5B709_VITVI	VVDGYSVVK	9	1	54.419	964.523	GKHVVFGKVVDGYSVV	VDGYSVVKEMEKVGTD	139	147	yes	yes	2	0.025806		K	V	V	V	K	E	0	0	0	1	0	0	0	1	0	0	0	1	0	0	0	1	0	0	1	4	0	0	48565000	0	0	933790	0	4446200
A5B878	tr|A5B878|A5B878_VITVI	GDFAVDIGR	9	51	124.74	948.466	DSAPGTIRGDFAVDIG	DFAVDIGRNVIHGSDS	103	111	yes	yes	1;2	0.00012278		R	G	D	G	R	N	1	1	0	2	0	0	0	2	0	1	0	0	0	1	0	0	0	0	0	1	0	0	3342500000	66438000	55330000	54680000	452330000	311480000
A5B878	tr|A5B878|A5B878_VITVI	GDFAVDIGRNVIHGSDSVGSAR	22	3	106.63	2228.09	DSAPGTIRGDFAVDIG	SDSVGSARKEIALWFP	103	124	yes	yes	3	9.8807e-27		R	G	D	A	R	K	2	2	1	3	0	0	0	4	1	2	0	0	0	1	0	3	0	0	0	3	0	1	97384000	3629900	2114300	0	12857000	9145900
A5B878	tr|A5B878|A5B878_VITVI	IIGATNPSDSAPGTIR	16	80	226.06	1568.82	NVVTTGRKIIGATNPS	DSAPGTIRGDFAVDIG	87	102	yes	yes	2;3	1.2342e-179		K	I	I	I	R	G	2	1	1	1	0	0	0	2	0	3	0	0	0	0	2	2	2	0	0	0	0	0	4834200000	80183000	82320000	66357000	731400000	461830000
A5B878	tr|A5B878|A5B878_VITVI	IIGATNPSDSAPGTIRGDFAVDIGR	25	2	46.558	2499.27	NVVTTGRKIIGATNPS	DFAVDIGRNVIHGSDS	87	111	yes	yes	3	6.1423e-14		K	I	I	G	R	N	3	2	1	3	0	0	0	4	0	4	0	0	0	1	2	2	2	0	0	1	0	1	0	0	0	0	0	0
A5B878	tr|A5B878|A5B878_VITVI	KEIALWFPEGPVAWSSSLNHWIYE	24	5	56.131	2858.41	SDSVGSARKEIALWFP	SLNHWIYE________	125	148	yes	yes	3	8.1851e-09		R	K	E	Y	E	-	2	0	1	0	0	0	3	1	1	2	2	1	0	1	2	3	0	3	1	1	0	1	36585000	0	0	0	13570000	9637100
A5B878	tr|A5B878|A5B878_VITVI	KIIGATNPSDSAPGTIR	17	46	212.92	1696.91	KNVVTTGRKIIGATNP	DSAPGTIRGDFAVDIG	86	102	yes	yes	2;3	4.5059e-156		R	K	I	I	R	G	2	1	1	1	0	0	0	2	0	3	0	1	0	0	2	2	2	0	0	0	0	1	2652800000	66239000	71595000	50739000	273540000	248190000
A5B878	tr|A5B878|A5B878_VITVI	MEQTFIMIKPDGVQR	15	134	216.07	1791.9	________________	IKPDGVQRNLVGEIIG	1	15	yes	yes	2;3	1.1852e-156	193;194	-	M	E	Q	R	N	0	1	0	1	0	2	1	1	0	2	0	1	2	1	1	0	1	0	0	1	0	1	1865000000	61594000	70893000	53690000	424700000	304760000
A5B878	tr|A5B878|A5B878_VITVI	NLVGEIIGR	9	41	156.46	969.561	IKPDGVQRNLVGEIIG	LVGEIIGRFEKKGFSL	16	24	yes	yes	1;2	1.4513e-13		R	N	L	G	R	F	0	1	1	0	0	0	1	2	0	2	1	0	0	0	0	0	0	0	0	1	0	0	3090300000	69909000	112100000	269040000	579890000	381840000
A5B878	tr|A5B878|A5B878_VITVI	NLVGEIIGRFEK	12	31	146.58	1373.77	IKPDGVQRNLVGEIIG	EIIGRFEKKGFSLKGL	16	27	yes	yes	2;3	2.3844e-20		R	N	L	E	K	K	0	1	1	0	0	0	2	2	0	2	1	1	0	1	0	0	0	0	0	1	0	1	656750000	6830900	1348500	0	73094000	19159000
A5B878	tr|A5B878|A5B878_VITVI	NVIHGSDSVGSAR	13	24	74.789	1297.64	DFAVDIGRNVIHGSDS	SDSVGSARKEIALWFP	112	124	yes	yes	2;3	0.00020343		R	N	V	A	R	K	1	1	1	1	0	0	0	2	1	1	0	0	0	0	0	3	0	0	0	2	0	0	55648000	751940	1349600	712400	6366800	6234600
A5B894	tr|A5B894|A5B894_VITVI	AAEAAVEFGGILVTLR	16	1	29.58	1615.89	EALANVFRAAEAAVEF	GGILVTLRMEIDDLVG	134	149	yes	yes	2	0.043494		R	A	A	L	R	M	4	1	0	0	0	0	2	2	0	1	2	0	0	1	0	0	1	0	0	2	0	0	0	0	0	0	0	0
A5B894	tr|A5B894|A5B894_VITVI	DLMAASWDELPDSVISSANK	20	0	43.696	2148	PEIQTVFKDLMAASWD	SVISSANKVLSKNTDD	94	113	yes	yes	2	0.0049313		K	D	L	N	K	V	3	0	1	3	0	0	1	0	0	1	2	1	1	0	1	4	0	1	0	1	0	0	3944800	0	0	0	2942500	0
A5B894	tr|A5B894|A5B894_VITVI	VTLLGTSGLSGSYVEQR	17	7	83.758	1765.92	DLGAEWGKVTLLGTSG	SGSYVEQRAP______	224	240	yes	yes	2	4.3928e-07		K	V	T	Q	R	A	0	1	0	0	0	1	1	3	0	0	3	0	0	0	0	3	2	0	1	2	0	0	32115000	0	3326700	1623900	9666400	4916200
A5B894	tr|A5B894|A5B894_VITVI	YTTYLDSFGPDEAFLR	16	33	190.41	1893.88	ALVTVFKRYTTYLDSF	GPDEAFLRKKVEMELG	181	196	yes	yes	2	9.2161e-105		R	Y	T	L	R	K	1	1	0	2	0	0	1	1	0	0	2	0	0	2	1	1	2	0	2	0	0	0	303580000	10990000	8428200	4462000	48969000	38152000
A5B8K3	tr|A5B8K3|A5B8K3_VITVI	AQEMVSSNPVVVFSK	15	32	147.64	1620.82	________________	NPVVVFSKTYCPFCVS	6	20	yes	yes	2	3.6061e-47	195	K	A	Q	S	K	T	1	0	1	0	0	1	1	0	0	0	0	1	1	1	1	3	0	0	0	4	0	0	232600000	0	0	763240	5986200	3988500
A5B8K3	tr|A5B8K3|A5B8K3_VITVI	KLLSELGATFK	11	4	60.364	1205.7	CPFCVSVKKLLSELGA	SELGATFKVVELDTES	31	41	yes	yes	2;3	0.004871		K	K	L	F	K	V	1	0	0	0	0	0	1	1	0	0	3	2	0	1	0	1	1	0	0	0	0	1	23154000	0	0	0	0	0
A5B8K3	tr|A5B8K3|A5B8K3_VITVI	LLSELGATFK	10	14	112.13	1077.61	PFCVSVKKLLSELGAT	SELGATFKVVELDTES	32	41	yes	yes	2	2.8354e-06		K	L	L	F	K	V	1	0	0	0	0	0	1	1	0	0	3	1	0	1	0	1	1	0	0	0	0	0	206480000	1665300	2233600	1466500	11049000	7805700
A5B8K3	tr|A5B8K3|A5B8K3_VITVI	TVPNVFIGGK	10	15	61.161	1030.58	LAGWTGQRTVPNVFIG	PNVFIGGKHIGGCDTA	66	75	yes	yes	2	0.012735		R	T	V	G	K	H	0	0	1	0	0	0	0	2	0	1	0	1	0	1	1	0	1	0	0	2	0	0	272770000	0	0	0	13762000	9917400
A5B8K3	tr|A5B8K3|A5B8K3_VITVI	VVELDTESDGADLQSALAGWTGQR	24	16	152.06	2517.2	SELGATFKVVELDTES	LAGWTGQRTVPNVFIG	42	65	yes	yes	2;3	4.271e-94		K	V	V	Q	R	T	3	1	0	3	0	2	2	3	0	0	3	0	0	0	0	2	2	1	0	2	0	0	201630000	0	0	0	8942800	19994000
A5B8K7	tr|A5B8K7|A5B8K7_VITVI	FDGIAPEPR	9	13	58.699	1000.5	IDARSKARFDGIAPEP	DGIAPEPRKGIRSGHV	275	283	yes	yes	2	0.0093583		R	F	D	P	R	K	1	1	0	1	0	0	1	1	0	1	0	0	0	1	2	0	0	0	0	0	0	0	159120000	3049200	9329800	2076000	24058000	19637000
A5B8K7	tr|A5B8K7|A5B8K7_VITVI	IWVLDGGLPTWR	12	25	127.56	1411.76	FRVFGHERIWVLDGGL	DGGLPTWRASGFDVES	190	201	yes	yes	2	3.7111e-13		R	I	W	W	R	A	0	1	0	1	0	0	0	2	0	1	2	0	0	0	1	0	1	2	0	1	0	0	165950000	4330700	5709000	2491600	32905000	28961000
A5B8K7	tr|A5B8K7|A5B8K7_VITVI	QAVGPITFQTR	11	3	63.091	1216.66	AIEKVYRRQAVGPITF	GPITFQTRFQPHLVWT	233	243	yes	yes	2	0.006033		R	Q	A	T	R	F	1	1	0	0	0	2	0	1	0	1	0	0	0	1	1	0	2	0	0	1	0	0	84312000	0	0	3063400	18014000	10164000
A5B8T3	tr|A5B8T3|A5B8T3_VITVI	APGGAPANVAIAVTR	15	10	101.42	1363.76	AEAPGFLKAPGGAPAN	NVAIAVTRLGGRSAFV	43	57	yes	yes	2	1.1603e-10		K	A	P	T	R	L	5	1	1	0	0	0	0	2	0	1	0	0	0	0	2	0	1	0	0	2	0	0	67182000	11629000	8926100	6923600	14109000	14215000
A5B8T3	tr|A5B8T3|A5B8T3_VITVI	EAGALLSYDPNLR	13	4	82.069	1417.72	LRAMEVAKEAGALLSY	LSYDPNLRLPLWPSAE	167	179	yes	yes	2	0.00042105		K	E	A	L	R	L	2	1	1	1	0	0	1	1	0	0	3	0	0	0	1	1	0	0	1	0	0	0	30309000	8271700	8311800	5183800	0	0
A5B8T3	tr|A5B8T3|A5B8T3_VITVI	IVDDQSVLEDEAR	13	2	76.759	1487.71	FVGALLCKIVDDQSVL	SVLEDEARLREVLKFA	280	292	yes	yes	2	0.0041293		K	I	V	A	R	L	1	1	0	3	0	1	2	0	0	1	1	0	0	0	0	1	0	0	0	2	0	0	8943400	2243600	2137900	0	4562000	0
A5B8T3	tr|A5B8T3|A5B8T3_VITVI	LPLWPSAEEAR	11	11	114.86	1267.66	LSYDPNLRLPLWPSAE	WPSAEEAREQIMSIWE	180	190	yes	yes	2	4.7767e-07		R	L	P	A	R	E	2	1	0	0	0	0	2	0	0	0	2	0	0	0	2	1	0	1	0	0	0	0	83581000	10381000	9085400	7406700	21117000	13465000
A5B8T3	tr|A5B8T3|A5B8T3_VITVI	NPSADMLLKPEELNLELIR	19	4	67.227	2194.17	EREFMFYRNPSADMLL	ELNLELIRSAKVFHYG	119	137	yes	yes	3	2.2546e-06	196	R	N	P	I	R	S	1	1	2	1	0	0	3	0	0	1	5	1	1	0	2	1	0	0	0	0	0	1	28340000	10638000	0	1332300	6224800	10146000
A5B8T3	tr|A5B8T3|A5B8T3_VITVI	TALAFVTLR	9	7	113.1	990.586	ITFDVGARTALAFVTL	ALAFVTLRADGEREFM	99	107	no	no	2	0.00029594		R	T	A	L	R	A	2	1	0	0	0	0	0	0	0	0	2	0	0	1	0	0	2	0	0	1	0	0	97420000	6809000	11022000	5691400	26827000	20364000
A5B8T6	tr|A5B8T6|A5B8T6_VITVI	AGLQFPVGR	9	28	138.54	943.524	KSVSKSVKAGLQFPVG	GLQFPVGRIARFLKTG	28	36	no	no	2	6.5147e-07		K	A	G	G	R	I	1	1	0	0	0	1	0	2	0	0	1	0	0	1	1	0	0	0	0	1	0	0	464310000	5730400	6057700	5389600	27690000	4809100
A5B8T6	tr|A5B8T6|A5B8T6_VITVI	HVLLAVR	7	4	132.01	806.513	KKNRISPRHVLLAVRN	RHVLLAVRNDEELGKL	89	95	yes	no	2	0.0071441		R	H	V	V	R	N	1	1	0	0	0	0	0	0	1	0	2	0	0	0	0	0	0	0	0	2	0	0	94133000	0	0	0	8917000	11932000
A5B9M3	tr|A5B9M3|A5B9M3_VITVI	EHAPVALGAAGAR	13	12	145.23	1218.65	NFGCGSSREHAPVALG	ALGAAGARAVVAESYA	151	163	yes	yes	2;3	1.2382e-28		R	E	H	A	R	A	5	1	0	0	0	0	1	2	1	0	1	0	0	0	1	0	0	0	0	1	0	0	116620000	0	4974500	3164900	18348000	35153000
A5B9M3	tr|A5B9M3|A5B9M3_VITVI	NSVSTGEVYPLETEVR	16	3	81.656	1778.87	SYARIFFRNSVSTGEV	YPLETEVRICEECRTG	177	192	yes	yes	2	4.65e-05		R	N	S	V	R	I	0	1	1	0	0	0	3	1	0	0	1	0	0	0	1	2	2	0	1	3	0	0	29122000	1539300	0	0	9817700	8935900
A5BA14	tr|A5BA14|A5BA14_VITVI	ASLDQDDSTLSR	12	8	130.1	1306.6	PDPPGFSRASLDQDDS	QDDSTLSRQKKDAEAN	38	49	yes	yes	2	2.3935e-13		R	A	S	S	R	Q	1	1	0	3	0	1	0	0	0	0	2	0	0	0	0	3	1	0	0	0	0	0	97212000	2361900	3019000	1711400	19002000	14782000
A5BA14	tr|A5BA14|A5BA14_VITVI	AWEVAQAPFK	10	6	85.355	1145.59	EANWKAQKAWEVAQAP	EVAQAPFKNLLMMGFM	63	72	yes	yes	2	0.0016059		K	A	W	F	K	N	3	0	0	0	0	1	1	0	0	0	0	1	0	1	1	0	0	1	0	1	0	0	46920000	711940	904320	1059200	0	0
A5BA14	tr|A5BA14|A5BA14_VITVI	WAVDLTDYSTTPSSR	15	0	58.814	1697.79	KGVMGGRRWAVDLTDY	YSTTPSSRDIPDPPGF	13	27	yes	yes	2	0.0069063		R	W	A	S	R	D	1	1	0	2	0	0	0	0	0	0	1	0	0	0	1	3	3	1	1	1	0	0	27161000	0	0	0	0	0
A5BA94	tr|A5BA94|A5BA94_VITVI	AGIVPVAYR	9	25	94.114	944.544	FQHIAQYRAGIVPVAY	GIVPVAYRRVSCRKSG	130	138	yes	yes	2	0.0026853		R	A	G	Y	R	R	2	1	0	0	0	0	0	1	0	1	0	0	0	0	1	0	0	0	1	2	0	0	927250000	10741000	8156400	7025000	13706000	10624000
A5BAX1	tr|A5BAX1|A5BAX1_VITVI	ETVDQIDEENR	11	19	193.28	1346.6	GENSESIKETVDQIDE	DQIDEENRSITFKVLD	71	81	yes	yes	2	1.2261e-65		K	E	T	N	R	S	0	1	1	2	0	1	3	0	0	1	0	0	0	0	0	0	1	0	0	1	0	0	1085100000	0	0	0	0	8493100
A5BAX1	tr|A5BAX1|A5BAX1_VITVI	HWSLTVGENSESIK	14	24	233.02	1585.77	WETQGSVKHWSLTVGE	GENSESIKETVDQIDE	57	70	yes	yes	2;3	3.3571e-185		K	H	W	I	K	E	0	0	1	0	0	0	2	1	1	1	1	1	0	0	0	3	1	1	0	1	0	0	228300000	0	0	0	0	0
A5BAX1	tr|A5BAX1|A5BAX1_VITVI	HWSLTVGENSESIKETVDQIDEENR	25	9	299.48	2914.36	WETQGSVKHWSLTVGE	DQIDEENRSITFKVLD	57	81	yes	yes	3;4	0		K	H	W	N	R	S	0	1	2	2	0	1	5	1	1	2	1	1	0	0	0	3	2	1	0	2	0	1	174250000	0	0	0	0	0
A5BAX1	tr|A5BAX1|A5BAX1_VITVI	IEVHEGDWETQGSVK	15	40	273.84	1712.8	ICSDKIHKIEVHEGDW	WETQGSVKHWSLTVGE	42	56	yes	no	2;3	0		K	I	E	V	K	H	0	0	0	1	0	1	3	2	1	1	0	1	0	0	0	1	1	1	0	2	0	0	759800000	0	0	0	0	0
A5BAX1	tr|A5BAX1|A5BAX1_VITVI	FTTQAIPK	8	4	77.318	904.502	LKDYKSYKFTTQAIPK	FTTQAIPKGEGCLVIW	101	108	yes	no	2	0.0088582		K	F	T	P	K	G	1	0	0	0	0	1	0	0	0	1	0	1	0	1	1	0	2	0	0	0	0	0	236900000	0	0	0	0	0
A5BAX1	tr|A5BAX1|A5BAX1_VITVI	DIESHLLNA	9	7	93.178	1010.5	EFSVNITKDIESHLLN	IESHLLNA________	143	151	yes	no	2	0.0028026		K	D	I	N	A	-	1	0	1	1	0	0	1	0	1	1	2	0	0	0	0	1	0	0	0	0	0	0	70390000	0	0	0	0	0
A5BBZ0	tr|A5BBZ0|A5BBZ0_VITVI	LQSELVGNASK	11	1	89.356	1144.61	NAEEKLVKLQSELVGN	ELVGNASKVTEISRVF	115	125	yes	yes	2	8.3872e-05		K	L	Q	S	K	V	1	0	1	0	0	1	1	1	0	0	2	1	0	0	0	2	0	0	0	1	0	0	38503000	0	0	0	0	0
A5BCW2	tr|A5BCW2|A5BCW2_VITVI	MDAIDNVFDPMR	12	29	141.13	1422.63	________________	DNVFDPMREFAKDSVR	1	12	yes	yes	2	2.1983e-17	199;200	-	M	D	M	R	E	1	1	1	3	0	0	0	0	0	1	0	0	2	1	1	0	0	0	0	1	0	0	316070000	550710	0	634750	17843000	8309600
A5BCW2	tr|A5BCW2|A5BCW2_VITVI	MDAIDNVFDPMREFAK	16	11	76.82	1897.87	________________	DPMREFAKDSVRLVKR	1	16	yes	yes	2	0.00036663	199;200	-	M	D	A	K	D	2	1	1	3	0	0	1	0	0	1	0	1	2	2	1	0	0	0	0	1	0	1	81281000	0	0	0	2083800	0
A5BDH7	tr|A5BDH7|A5BDH7_VITVI	EAQEALLIR	9	0	70.908	1041.58	GGRPESVKEAQEALLI	AQEALLIRAKANSLAQ	358	366	yes	yes	2	0.059747		K	E	A	I	R	A	2	1	0	0	0	1	2	0	0	1	2	0	0	0	0	0	0	0	0	0	0	0	70364000	3483700	3921300	3285100	13246000	11452000
A5BDH7	tr|A5BDH7|A5BDH7_VITVI	TVVSIPNGPSALALK	15	1	32.932	1465.85	GARFAKWRTVVSIPNG	GPSALALKEAAWGLAR	188	202	yes	yes	2	0.051012		R	T	V	L	K	E	2	0	1	0	0	0	0	1	0	1	2	1	0	0	2	2	1	0	0	2	0	0	14068000	0	0	0	5466900	4207000
A5BDH7	tr|A5BDH7|A5BDH7_VITVI	YAAISQDNGLVPIVEPEILLDGEHGIER	28	7	119.45	3046.56	EAAWGLARYAAISQDN	DGEHGIERTFEVAQKV	211	238	yes	yes	3	7.258e-64		R	Y	A	E	R	T	2	1	1	2	0	1	4	3	1	4	3	0	0	0	2	1	0	0	1	2	0	0	52406000	0	0	1115800	20758000	13916000
A5BDX1	tr|A5BDX1|A5BDX1_VITVI	ESSVETVLDSSR	12	17	114.02	1307.62	CFVLPGQRESSVETVL	ETVLDSSRYFVLKIED	82	93	yes	yes	2	7.2028e-08		R	E	S	S	R	Y	0	1	0	1	0	0	2	0	0	0	1	0	0	0	0	4	1	0	0	2	0	0	189290000	4473000	2879500	2909700	28357000	32678000
A5BDX1	tr|A5BDX1|A5BDX1_VITVI	SFDEDEAFEHTLLVVR	16	7	233.78	1905.91	________________	EHTLLVVREVSVYKIP	2	17	yes	yes	2	1.7315e-203		M	S	F	V	R	E	1	1	0	2	0	0	3	0	1	0	2	0	0	2	0	1	1	0	0	2	0	0	174510000	0	0	0	42441000	48654000
A5BE36	tr|A5BE36|A5BE36_VITVI	ASPENAPLIDVTQFGYFK	18	3	80.316	1995.99	IPQDVKDKASPENAPL	VTQFGYFKVLGKGALP	90	107	yes	yes	2	7.3212e-07		K	A	S	F	K	V	2	0	1	1	0	1	1	1	0	1	1	1	0	2	2	1	1	0	1	1	0	0	19965000	0	0	0	8630600	0
A5BE36	tr|A5BE36|A5BE36_VITVI	LWSLIPQDVK	10	3	88.056	1197.68	CPIVNIDKLWSLIPQD	SLIPQDVKDKASPENA	78	87	yes	yes	2	0.0013197		K	L	W	V	K	D	0	0	0	1	0	1	0	0	0	1	2	1	0	0	1	1	0	1	0	1	0	0	37716000	0	1519200	0	0	0
A5BE40	tr|A5BE40|A5BE40_VITVI	LADVLELVGIPK	12	0	71.176	1265.76	NAVWGGAKLADVLELV	LELVGIPKFTSTTQSG	132	143	yes	yes	2	0.0058674		K	L	A	P	K	F	1	0	0	1	0	0	1	1	0	1	3	1	0	0	1	0	0	0	0	2	0	0	23988000	0	0	0	2799100	4699400
A5BE40	tr|A5BE40|A5BE40_VITVI	VDAPHSTEIVAK	12	1	45.357	1265.66	AWVLFEAKVDAPHSTE	HSTEIVAKAVDTAANV	343	354	yes	yes	3	0.0042231		K	V	D	A	K	A	2	0	0	1	0	0	1	0	1	1	0	1	0	0	1	1	1	0	0	2	0	0	0	0	0	0	0	0
A5BE40	tr|A5BE40|A5BE40_VITVI	VIVPGVIGAR	10	6	57.55	979.618	RDHGYPLRVIVPGVIG	VPGVIGARSVKWLDSI	208	217	yes	yes	2	0.016889		R	V	I	A	R	S	1	1	0	0	0	0	0	2	0	2	0	0	0	0	1	0	0	0	0	3	0	0	98613000	0	2046000	0	15951000	6267500
A5BE54	tr|A5BE54|A5BE54_VITVI	ASALIQHEWRPR	12	30	184.55	1462.78	ARVNNFGKASALIQHE	IQHEWRPRSLFTISGE	237	248	yes	yes	2;3;4	1.4233e-54		K	A	S	P	R	S	2	2	0	0	0	1	1	0	1	1	1	0	0	0	1	1	0	1	0	0	0	1	1375000000	4482300	7032500	6591400	138540000	125960000
A5BE54	tr|A5BE54|A5BE54_VITVI	GDIFVADVNTQLK	13	3	49.62	1418.74	ITSSGTKKGDIFVADV	ADVNTQLKNKNITTDV	49	61	yes	yes	2	0.006353		K	G	D	L	K	N	1	0	1	2	0	1	0	1	0	1	1	1	0	1	0	0	1	0	0	2	0	0	0	0	0	0	0	0
A5BE54	tr|A5BE54|A5BE54_VITVI	GPGLYTEIGK	10	9	101.82	1033.54	________________	GLYTEIGKKARDLLYK	4	13	yes	yes	2	0.00018035		K	G	P	G	K	K	0	0	0	0	0	0	1	3	0	1	1	1	0	0	1	0	1	0	1	0	0	0	182660000	1283500	2021100	1011100	27507000	22334000
A5BE54	tr|A5BE54|A5BE54_VITVI	GPGLYTEIGKK	11	10	69.554	1161.64	________________	LYTEIGKKARDLLYKD	4	14	yes	yes	2;3	0.003305		K	G	P	K	K	A	0	0	0	0	0	0	1	3	0	1	1	2	0	0	1	0	1	0	1	0	0	1	127960000	0	0	0	9042200	9337600
A5BE54	tr|A5BE54|A5BE54_VITVI	IDTSSNLFVTVTVDEPAPGLK	21	5	77.959	2202.14	KNITTDVKIDTSSNLF	DEPAPGLKSIFNFKVP	71	91	yes	yes	2	1.5101e-12		K	I	D	L	K	S	1	0	1	2	0	0	1	1	0	1	2	1	0	1	2	2	3	0	0	3	0	0	22222000	0	0	0	0	11678000
A5BE54	tr|A5BE54|A5BE54_VITVI	KGDIFVADVNTQLK	14	12	123.08	1546.84	AITSSGTKKGDIFVAD	ADVNTQLKNKNITTDV	48	61	yes	yes	2;3	2.3169e-16		K	K	G	L	K	N	1	0	1	2	0	1	0	1	0	1	1	2	0	1	0	0	1	0	0	2	0	1	201980000	1685100	1630500	0	22647000	23596000
A5BE54	tr|A5BE54|A5BE54_VITVI	LDPLTTVK	8	7	64.268	885.517	LTLGAQHKLDPLTTVK	LDPLTTVKARVNNFGK	221	228	yes	yes	2	0.0098664		K	L	D	V	K	A	0	0	0	1	0	0	0	0	0	0	2	1	0	0	1	0	2	0	0	1	0	0	642440000	5832900	6551100	3607800	74460000	39265000
A5BE54	tr|A5BE54|A5BE54_VITVI	SIFNFKVPDQR	11	9	74.392	1349.71	DEPAPGLKSIFNFKVP	NFKVPDQRSGKVELQY	92	102	yes	yes	2;3	0.0025578		K	S	I	Q	R	S	0	1	1	1	0	1	0	0	0	1	0	1	0	2	1	1	0	0	0	1	0	1	123510000	0	0	0	19285000	7455600
A5BE54	tr|A5BE54|A5BE54_VITVI	SLFTISGEVDTK	12	20	102.87	1295.66	IQHEWRPRSLFTISGE	ISGEVDTKAVDKTAKV	249	260	yes	yes	2	1.8274e-05		R	S	L	T	K	A	0	0	0	1	0	0	1	1	0	1	1	1	0	1	0	2	2	0	0	1	0	0	262910000	3043400	5018600	3744200	31550000	31815000
A5BE54	tr|A5BE54|A5BE54_VITVI	VGLALALKP	9	19	82.452	880.575	KAVDKTAKVGLALALK	GLALALKP________	268	276	yes	yes	2	0.011244		K	V	G	K	P	-	2	0	0	0	0	0	0	1	0	0	3	1	0	0	1	0	0	0	0	1	0	1	199610000	0	0	0	44249000	28990000
A5BEF3	tr|A5BEF3|A5BEF3_VITVI	FEPAAPPAR	9	3	79.474	954.492	DGDKKEKKFEPAAPPA	EPAAPPARVGRKQRKQ	29	37	yes	yes	2	0.0050228		K	F	E	A	R	V	3	1	0	0	0	0	1	0	0	0	0	0	0	1	3	0	0	0	0	0	0	0	98987000	0	0	0	0	19744000
A5BEF3	tr|A5BEF3|A5BEF3_VITVI	IESLDPALLRPGR	13	5	69.846	1435.81	KVILATNRIESLDPAL	PALLRPGRIDRKIEFP	339	351	yes	yes	3	0.00070536		R	I	E	G	R	I	1	2	0	1	0	0	1	1	0	1	3	0	0	0	2	1	0	0	0	0	0	1	96423000	0	2207200	4149300	13692000	30589000
A5BEF3	tr|A5BEF3|A5BEF3_VITVI	IKDYLLMEEEFVSNQER	17	5	46.209	2142.03	LRLLKLERIKDYLLME	EFVSNQERLKPQEEKT	73	89	yes	yes	3	0.0024052		R	I	K	E	R	L	0	1	1	1	0	1	4	0	0	1	2	1	1	1	0	1	0	0	1	1	0	1	29367000	0	0	0	9152300	0
A5BEF3	tr|A5BEF3|A5BEF3_VITVI	LPTVTPLSK	9	1	47.097	954.575	KGPEAAARLPTVTPLS	PTVTPLSKCKLRLLKL	54	62	yes	yes	2	0.050532		R	L	P	S	K	C	0	0	0	0	0	0	0	0	0	0	2	1	0	0	2	1	2	0	0	1	0	0	105060000	0	0	0	8059700	7550000
A5BEF3	tr|A5BEF3|A5BEF3_VITVI	TMLELLNQLDGFDSR	15	5	138.19	1750.86	GGEREIQRTMLELLNQ	QLDGFDSRGDVKVILA	313	327	yes	yes	2	3.3407e-38		R	T	M	S	R	G	0	1	1	2	0	1	1	1	0	0	4	0	1	1	0	1	1	0	0	0	0	0	37171000	0	0	1014400	14069000	6995400
A5BEJ8	tr|A5BEJ8|A5BEJ8_VITVI	DDLFNINAGIVR	12	8	113.38	1345.7	PRKPGMTRDDLFNINA	NINAGIVRTLCEGIAK	131	142	yes	yes	2	8.6484e-08		R	D	D	V	R	T	1	1	2	2	0	0	0	1	0	2	1	0	0	1	0	0	0	0	0	1	0	0	28645000	0	0	0	9538000	3228000
A5BEJ8	tr|A5BEJ8|A5BEJ8_VITVI	GFLGQPQLESALTGMDLVIIPAGVPR	26	6	25.819	2678.45	MDTGAVVRGFLGQPQL	IIPAGVPRKPGMTRDD	99	124	yes	yes	3	0.0039876		R	G	F	P	R	K	2	1	0	1	0	2	1	4	0	2	4	0	1	1	3	1	1	0	0	2	0	0	22950000	0	0	0	7647300	5550000
A5BEJ8	tr|A5BEJ8|A5BEJ8_VITVI	SGAEEIYQLGPLNEYER	17	1	32.366	1966.93	ATKVRLGRSGAEEIYQ	GPLNEYERVGLEKAKK	317	333	yes	yes	2	0.029567		R	S	G	E	R	V	1	1	1	0	0	1	4	2	0	1	2	0	0	0	1	1	0	0	2	0	0	0	1480700	0	0	0	0	0
A5BEL8	tr|A5BEL8|A5BEL8_VITVI	MGAADELTEQQAR	13	3	85.536	1418.65	EWIGRLSKMGAADELT	ELTEQQARQLHFDLES	175	187	yes	yes	2	7.1503e-05	202	K	M	G	A	R	Q	3	1	0	1	0	2	2	1	0	0	1	0	1	0	0	0	1	0	0	0	0	0	2233600	0	0	0	0	0
A5BEM6	tr|A5BEM6|A5BEM6_VITVI	ITGELIQGILDAGK	14	1	71.316	1426.8	GSYEYLDKITGELIQG	QGILDAGKKAGHAICG	375	388	yes	yes	2	0.0011576		K	I	T	G	K	K	1	0	0	1	0	1	1	3	0	3	2	1	0	0	0	0	1	0	0	0	0	0	16809000	0	0	0	7581500	0
A5BEM8	tr|A5BEM8|A5BEM8_VITVI	AMSINLIR	8	8	101.33	916.516	LGLGIMGKAMSINLIR	AMSINLIRSGFKLTVW	14	21	yes	yes	2	0.0065279		K	A	M	I	R	S	1	1	1	0	0	0	0	0	0	2	1	0	1	0	0	1	0	0	0	0	0	0	29936000	0	0	0	6980500	0
A5BEM8	tr|A5BEM8|A5BEM8_VITVI	MEVGFLGLGIMGK	13	18	111.79	1350.7	________________	LGLGIMGKAMSINLIR	1	13	yes	yes	2	2.5261e-09	203;204	-	M	E	G	K	A	0	0	0	0	0	0	1	4	0	1	2	1	2	1	0	0	0	0	0	1	0	0	31183000	810780	807480	757010	9968800	9241700
A5BEM8	tr|A5BEM8|A5BEM8_VITVI	SGLNPHTLLDVLDLGGIANPMFR	23	9	89.663	2449.28	EGLVLADRSGLNPHTL	GIANPMFRLKGPTMIQ	194	216	yes	no	3	3.0004e-24		R	S	G	F	R	L	1	1	2	2	0	0	0	3	1	1	5	0	1	1	2	1	1	0	0	1	0	0	20716000	0	0	0	7082600	4901100
A5BF93	tr|A5BF93|A5BF93_VITVI	GGTSIEDLAEKFPDMIVK	18	1	35.625	1948.98	PIIIACRKGGTSIEDL	KFPDMIVKVPIDVFQG	164	181	yes	yes	3	0.0084499		K	G	G	V	K	V	1	0	0	2	0	0	2	2	0	2	1	2	1	1	1	1	1	0	0	1	0	1	16236000	0	0	0	4405900	0
A5BF93	tr|A5BF93|A5BF93_VITVI	GVAVGSIEEVRK	12	0	27.098	1242.69	KYGINVPKGVAVGSIE	GSIEEVRKTIQDVFPK	49	60	yes	yes	3	0.046321		K	G	V	R	K	T	1	1	0	0	0	0	2	2	0	1	0	1	0	0	0	1	0	0	0	3	0	1	14957000	0	0	0	6181700	7151300
A5BF93	tr|A5BF93|A5BF93_VITVI	LHGGTPANFLDVGGNASESQVVEAFK	26	4	96.351	2643.29	MATMDIIKLHGGTPAN	SQVVEAFKILTADDKV	313	338	yes	yes	3	1.6847e-44		K	L	H	F	K	I	3	0	2	1	0	1	2	4	1	0	2	1	0	2	1	2	1	0	0	3	0	0	24194000	0	0	0	12291000	10257000
A5BF93	tr|A5BF93|A5BF93_VITVI	LNFDDNAAFR	10	3	87.485	1181.55	QLVAADAKLNFDDNAA	FDDNAAFRQKHIFALR	251	260	yes	yes	2	0.0013802		K	L	N	F	R	Q	2	1	2	2	0	0	0	0	0	0	1	0	0	2	0	0	0	0	0	0	0	0	28698000	1026600	2039100	857290	8614500	7776600
A5BF93	tr|A5BF93|A5BF93_VITVI	TDQVEELAGK	10	11	99.283	1088.54	KGGVHIVKTDQVEELA	QVEELAGKMLGQILVT	101	110	yes	yes	2	0.00027388		K	T	D	G	K	M	1	0	0	1	0	1	2	1	0	0	1	1	0	0	0	0	1	0	0	1	0	0	83869000	4363900	2482200	2339900	14959000	9895500
A5BF93	tr|A5BF93|A5BF93_VITVI	VPIDVFQGITDEDAAK	16	8	139.08	1716.86	KFPDMIVKVPIDVFQG	ITDEDAAKVVDGLAPK	182	197	yes	yes	2	1.028e-38		K	V	P	A	K	V	2	0	0	3	0	1	1	1	0	2	0	1	0	1	1	0	1	0	0	2	0	0	402470000	0	0	5394500	53859000	25002000
A5BFE0	tr|A5BFE0|A5BFE0_VITVI	SVITPLFDVR	10	9	73.499	1145.64	SYAVSLSKSVITPLFD	ITPLFDVRMLLIIPLF	241	250	yes	yes	2	0.0036102		K	S	V	V	R	M	0	1	0	1	0	0	0	0	0	1	1	0	0	1	1	1	1	0	0	2	0	0	31301000	0	1910200	2451400	10577000	3141200
A5BFH4	tr|A5BFH4|A5BFH4_VITVI	DLPTEVFGFPGLPPLK	16	4	66.246	1725.93	DRTTESFKDLPTEVFG	FPGLPPLKATHMPELV	164	179	yes	yes	2	0.00084919		K	D	L	L	K	A	0	0	0	1	0	0	1	2	0	0	3	1	0	2	4	0	1	0	0	1	0	0	25482000	0	0	0	0	0
A5BFH4	tr|A5BFH4|A5BFH4_VITVI	IVIFPAAGLSHLVPMVELAK	20	2	70.094	2104.21	________________	VPMVELAKLILHRHPL	5	24	yes	yes	3	1.1326e-09		K	I	V	A	K	L	3	0	0	0	0	0	1	1	1	2	3	1	1	1	2	1	0	0	0	3	0	0	16878000	0	0	0	0	0
A5BFH4	tr|A5BFH4|A5BFH4_VITVI	KIEESTDVDLEALLPEEFLER	21	2	45.885	2474.24	NPKEGKGKKIEESTDV	LPEEFLERTRDRGLVV	322	342	yes	yes	3	5.744e-09		K	K	I	E	R	T	1	1	0	2	0	0	6	0	0	1	4	1	0	1	1	1	1	0	0	1	0	1	2651800	0	0	0	0	0
A5BFL3	tr|A5BFL3|A5BFL3_VITVI	TGEEEEIYLPDTIDVGSSSQQR	22	4	37.4	2452.12	CIAKNALKTGEEEEIY	VGSSSQQRSSGCEC__	179	200	yes	yes	2	0.0027688		K	T	G	Q	R	S	0	1	0	2	0	2	4	2	0	2	1	0	0	0	1	3	2	0	1	1	0	0	30599000	0	0	0	6410700	4668300
A5BFL3	tr|A5BFL3|A5BFL3_VITVI	TSLMNQYVNK	10	2	77.14	1196.59	LGDSGVGKTSLMNQYV	LMNQYVNKKFSNQYKA	22	31	yes	yes	2	0.0027759	205	K	T	S	N	K	K	0	0	2	0	0	1	0	0	0	0	1	1	1	0	0	1	1	0	1	1	0	0	3762800	0	2094300	0	0	0
A5BFL3	tr|D7U0H2|D7U0H2_VITVI	FQSLGVAFYR	10	5	101.38	1186.61	WDTAGQERFQSLGVAF	SLGVAFYRGADCCVLV	70	79	no	no	2	0.00019194		R	F	Q	Y	R	G	1	1	0	0	0	1	0	1	0	0	1	0	0	2	0	1	0	0	1	1	0	0	283610000	4843500	8697500	6519800	46504000	28618000
A5BFL3	tr|D7U0H2|D7U0H2_VITVI	ATIGADFLTK	10	4	51.286	1035.56	KKFSNQYKATIGADFL	IGADFLTKEVQFEDRL	39	48	no	no	2	0.032138		K	A	T	T	K	E	2	0	0	1	0	0	0	1	0	1	1	1	0	1	0	0	2	0	0	0	0	0	200050000	6777800	5982700	3719800	27820000	30494000
A5BFL3	tr|D7U0H2|D7U0H2_VITVI	LFTLQIWDTAGQER	14	17	194.48	1676.85	KEVQFEDRLFTLQIWD	WDTAGQERFQSLGVAF	56	69	no	no	2	2.7898e-90		R	L	F	E	R	F	1	1	0	1	0	2	1	1	0	1	2	0	0	1	0	0	2	1	0	0	0	0	179440000	7093300	2327100	0	33398000	38452000
A5BFL3	tr|D7U0H2|D7U0H2_VITVI	SFDNLNNWR	9	8	114.89	1164.53	VYDVNVMKSFDNLNNW	FDNLNNWREEFLIQAS	95	103	no	no	2	0.00027561		K	S	F	W	R	E	0	1	3	1	0	0	0	0	0	0	1	0	0	1	0	1	0	1	0	0	0	0	79927000	2846200	2211600	2638300	18008000	13771000
A5BFL3	tr|D7U0H2|D7U0H2_VITVI	VIILGDSGVGK	11	1	58.172	1056.62	SRRRTLLKVIILGDSG	LGDSGVGKTSLMNQYV	11	21	no	no	2	0.010516		K	V	I	G	K	T	0	0	0	1	0	0	0	3	0	2	1	1	0	0	0	1	0	0	0	2	0	0	265140000	5107400	7611800	5330500	44171000	40323000
A5BG91	tr|A5BG91|A5BG91_VITVI	LYDLLLQNVADLSDLVSSGR	20	5	51.876	2190.15	TKPEELVRLYDLLLQN	SDLVSSGRDRKPEEVS	386	405	yes	yes	2;3	0.00039981		R	L	Y	G	R	D	1	1	1	3	0	1	0	1	0	0	6	0	0	0	0	3	0	0	1	2	0	0	15052000	0	0	0	3588400	5859400
A5BG91	tr|A5BG91|A5BG91_VITVI	SITESTVTEVR	11	4	50.116	1220.62	GRGKYTRRSITESTVT	ESTVTEVRFLHLILYT	79	89	yes	yes	2	0.024729		R	S	I	V	R	F	0	1	0	0	0	0	2	0	0	1	0	0	0	0	0	2	3	0	0	2	0	0	84479000	0	0	0	9165500	9971600
A5BGC5	tr|A5BGC5|A5BGC5_VITVI	ELAPYDPDWYYVR	13	10	60.157	1685.77	IVKTATFKELAPYDPD	DPDWYYVRAASMARKI	48	60	yes	yes	2	0.0034609		K	E	L	V	R	A	1	1	0	2	0	0	1	0	0	0	1	0	0	0	2	0	0	1	3	1	0	0	51042000	666350	1818900	1244000	5919700	6715000
A5BGC5	tr|A5BGC5|A5BGC5_VITVI	HILQQLEK	8	9	133.12	1007.58	KSSGSIARHILQQLEK	HILQQLEKMNIIENDP	106	113	yes	yes	2	0.00042901		R	H	I	E	K	M	0	0	0	0	0	2	1	0	1	1	2	1	0	0	0	0	0	0	0	0	0	0	140880000	8232800	0	0	0	0
A5BGC5	tr|A5BGC5|A5BGC5_VITVI	MNIIENDPR	9	9	103.26	1100.53	HILQQLEKMNIIENDP	NIIENDPRGGRRITSS	114	122	yes	yes	2	0.00034813	206	K	M	N	P	R	G	0	1	2	1	0	0	1	0	0	2	0	0	1	0	1	0	0	0	0	0	0	0	90436000	1496200	1929700	677170	2567000	2258300
A5BGC5	tr|A5BGC5|A5BGC5_VITVI	QGLGVGGFR	9	2	59.597	889.477	MARKIYLRQGLGVGGF	GLGVGGFRRIYGGSKR	72	80	yes	yes	2	0.016417		R	Q	G	F	R	R	0	1	0	0	0	1	0	4	0	0	1	0	0	1	0	0	0	0	0	1	0	0	195370000	0	4612400	0	0	29294000
A5BGY1	tr|A5BGY1|A5BGY1_VITVI	AVVVDNLDNSSEIAIHR	17	29	179.14	1850.95	QLLLGGFRAVVVDNLD	SSEIAIHRVKELAAEF	29	45	yes	yes	2;3	5.5274e-106		R	A	V	H	R	V	2	1	2	2	0	0	1	0	1	2	1	0	0	0	0	2	0	0	0	3	0	0	265400000	6796000	9231800	5141700	39489000	41037000
A5BGY1	tr|A5BGY1|A5BGY1_VITVI	DIYGSDSEWK	10	2	46.73	1198.51	LVIEDICRDIYGSDSE	YGSDSEWKIVLLRYFN	166	175	yes	yes	2	0.047305		R	D	I	W	K	I	0	0	0	2	0	0	1	1	0	1	0	1	0	0	0	2	0	1	1	0	0	0	47068000	0	0	0	0	2165500
A5BGY1	tr|A5BGY1|A5BGY1_VITVI	ELAAEFGDNLVFHK	14	2	55.724	1588.79	EIAIHRVKELAAEFGD	GDNLVFHKLDLRDKQA	48	61	yes	yes	2;3	0.00076135		K	E	L	H	K	L	2	0	1	1	0	0	2	1	1	0	2	1	0	2	0	0	0	0	0	1	0	0	29579000	0	0	0	10152000	0
A5BGY1	tr|A5BGY1|A5BGY1_VITVI	YFNPVGAHSSGHIGEDPR	18	16	108.71	1938.9	EWKIVLLRYFNPVGAH	GHIGEDPRGIPNNLMP	181	198	yes	yes	2;3	1.8851e-21		R	Y	F	P	R	G	1	1	1	1	0	0	1	3	2	1	0	0	0	1	2	2	0	0	1	1	0	0	270490000	2260500	2755500	0	54378000	36658000
A5BGY1	tr|A5BGY1|A5BGY1_VITVI	GIPNNLMPFVQQVAVGR	17	15	82.578	1838.98	GHIGEDPRGIPNNLMP	VQQVAVGRRPALTVFG	199	215	yes	no	2;3	1.0641e-07	207	R	G	I	G	R	R	1	1	2	0	0	2	0	2	0	1	1	0	1	1	2	0	0	0	0	3	0	0	199980000	374740	1160600	1016200	48703000	26896000
A5BHE6	tr|A5BHE6|A5BHE6_VITVI	FFETFAAPFTK	11	32	145.23	1304.64	PYNPLQSKFFETFAAP	TFAAPFTKRGLLLKFL	88	98	yes	yes	2	3.3023e-20		K	F	F	T	K	R	2	0	0	0	0	0	1	0	0	0	0	1	0	4	1	0	2	0	0	0	0	0	389230000	2297600	6490000	5049100	64304000	7011800
A5BHE6	tr|A5BHE6|A5BHE6_VITVI	FFETFAAPFTKR	12	4	69.03	1460.75	PYNPLQSKFFETFAAP	FAAPFTKRGLLLKFLL	88	99	yes	yes	3	0.00026295		K	F	F	K	R	G	2	1	0	0	0	0	1	0	0	0	0	1	0	4	1	0	2	0	0	0	0	1	15650000	0	0	0	5885300	0
A5BHE6	tr|A5BHE6|A5BHE6_VITVI	GPQLPPQPGPR	11	59	142	1142.62	DDYLPIKKGPQLPPQP	LPPQPGPRGKI_____	131	141	yes	yes	2	6.8671e-16		K	G	P	P	R	G	0	1	0	0	0	2	0	2	0	0	1	0	0	0	5	0	0	0	0	0	0	0	1007900000	20283000	20691000	9344100	146020000	113870000
A5BHE6	tr|A5BHE6|A5BHE6_VITVI	KGPQLPPQPGPR	12	23	150.1	1270.71	SDDYLPIKKGPQLPPQ	LPPQPGPRGKI_____	130	141	yes	yes	2;3	1.5502e-22		K	K	G	P	R	G	0	1	0	0	0	2	0	2	0	0	1	1	0	0	5	0	0	0	0	0	0	1	601220000	3712500	6006500	3047900	67955000	75609000
A5BHE6	tr|A5BHE6|A5BHE6_VITVI	SVYFDLEDLGNTTGQWDVYGSDAPSPYNPLQSK	33	3	39.113	3662.67	VVAKYGDKSVYFDLED	PYNPLQSKFFETFAAP	55	87	yes	yes	3	2.3127e-08		K	S	V	S	K	F	1	0	2	4	0	2	1	3	0	0	3	1	0	1	3	4	2	1	3	2	0	0	114830000	3721300	0	0	11926000	17233000
A5BHS0	tr|A5BHS0|A5BHS0_VITVI	SAFSLLNQVIDEYQK	15	0	66.387	1753.89	MDDHYPVRSAFSLLNQ	QVIDEYQKNFGDSWRT	90	104	yes	yes	2	0.0015342		R	S	A	Q	K	N	1	0	1	1	0	2	1	0	0	1	2	1	0	1	0	2	0	0	1	1	0	0	92693000	0	6850000	0	18760000	13286000
A5BHS0	tr|A5BHS0|A5BHS0_VITVI	EFIVFVGR	8	5	82.716	965.533	YFQRSSVKEFIVFVGR	EFIVFVGRTVAKRTPP	40	47	yes	no	2	0.0072346		K	E	F	G	R	T	0	1	0	0	0	0	1	1	0	1	0	0	0	2	0	0	0	0	0	2	0	0	46476000	0	0	0	6328800	0
A5BHS0	tr|A5BHS0|A5BHS0_VITVI	NFGDSWR	7	2	63.21	880.383	QVIDEYQKNFGDSWRT	KNFGDSWRTVQADNTQ	105	111	yes	no	2	0.056653		K	N	F	W	R	T	0	1	1	1	0	0	0	1	0	0	0	0	0	1	0	1	0	1	0	0	0	0	34642000	1848400	0	0	8100800	5324100
A5BHW6	tr|A5BHW6|A5BHW6_VITVI	NIDVLAGPVVSLAYPLYASIR	21	0	46.35	2230.24	NFLKVVLKNIDVLAGP	YPLYASIRAIETKSPV	15	35	yes	yes	2	0.0016383		K	N	I	I	R	A	3	1	1	1	0	0	0	1	0	2	3	0	0	0	2	2	0	0	2	3	0	0	14894000	0	0	0	2785400	2936400
A5BHW6	tr|A5BHW6|A5BHW6_VITVI	TVNIWYVPR	9	10	90.919	1146.62	RPLFVNPRTVNIWYVP	VNIWYVPRKKDVFSKP	111	119	yes	yes	2	0.003087		R	T	V	P	R	K	0	1	1	0	0	0	0	0	0	1	0	0	0	0	1	0	1	1	1	2	0	0	87700000	0	1305900	779330	0	36462000
A5BHW6	tr|A5BHW6|A5BHW6_VITVI	YIQENGPDAFENIINR	16	2	62.055	1891.91	DILTAAEKYIQENGPD	AFENIINRVDRESKSR	137	152	yes	yes	2	0.00027999		K	Y	I	N	R	V	1	1	3	1	0	1	2	1	0	3	0	0	0	1	1	0	0	0	1	0	0	0	0	0	0	0	0	0
A5BHY1	tr|A5BHY1|A5BHY1_VITVI	ILEEVAIIPSK	11	8	77.185	1210.72	LDFHTNKKILEEVAII	EVAIIPSKRLRNKIAG	34	44	yes	yes	2	0.0013822		K	I	L	S	K	R	1	0	0	0	0	0	2	0	0	3	1	1	0	0	1	1	0	0	0	1	0	0	180640000	2947200	2249700	2666500	16879000	15037000
A5BHY1	tr|A5BHY1|A5BHY1_VITVI	ILEEVAIIPSKR	12	25	91.62	1366.82	LDFHTNKKILEEVAII	VAIIPSKRLRNKIAGF	34	45	yes	yes	2;3	3.7029e-05		K	I	L	K	R	L	1	1	0	0	0	0	2	0	0	3	1	1	0	0	1	1	0	0	0	1	0	1	325880000	5321400	4578900	4134500	26350000	0
A5BHY1	tr|A5BHY1|A5BHY1_VITVI	RMDFVPDESAIK	12	1	21.353	1406.69	LQEEERERRMDFVPDE	VPDESAIKTDVIKVDK	81	92	yes	yes	3	0.075131		R	R	M	I	K	T	1	1	0	2	0	0	1	0	0	1	0	1	1	1	1	1	0	0	0	1	0	1	22865000	0	874160	0	6820200	0
A5BHY1	tr|A5BHY1|A5BHY1_VITVI	IAGFSTHLMK	10	8	70.808	1103.58	PSKRLRNKIAGFSTHL	GFSTHLMKRIQKGPVR	50	59	yes	no	2;3	0.00044387	208	K	I	A	M	K	R	1	0	0	0	0	0	0	1	1	1	1	1	1	1	0	1	1	0	0	0	0	0	117000000	0	0	0	15408000	9997600
A5BHY1	tr|A5BHY1|A5BHY1_VITVI	MTLDFHTNKK	10	1	31.136	1233.62	VIERYYSRMTLDFHTN	LDFHTNKKILEEVAII	24	33	yes	no	3	0.04119		R	M	T	K	K	I	0	0	1	1	0	0	0	0	1	0	1	2	1	1	0	0	2	0	0	0	0	1	4303500	1820900	1584000	898600	0	0
A5BIN1	tr|A5BIN1|A5BIN1_VITVI	GESLTVQAPGTQTR	14	17	128.73	1443.73	NFIAQAIRGESLTVQA	QAPGTQTRSFCYVSDM	229	242	yes	yes	2	3.37e-23		R	G	E	T	R	S	1	1	0	0	0	2	1	2	0	0	1	0	0	0	1	1	3	0	0	1	0	0	148430000	6550400	7737500	3801200	23493000	10761000
A5BIN1	tr|A5BIN1|A5BIN1_VITVI	ILLTSTSEVYGDPLVHPQEESYWGNVNPIGVR	32	16	113.15	3568.78	LAKRVGARILLTSTSE	NVNPIGVRSCYDEGKR	142	173	yes	yes	3;4	8.2544e-79		R	I	L	V	R	S	0	1	2	1	0	1	3	3	1	2	3	0	0	0	3	3	2	1	2	4	0	0	190430000	4543300	3645400	0	12125000	14218000
A5BIN1	tr|A5AXR4|A5AXR4_VITVI	ILVTGGAGFIGSHLVDK	17	13	106.93	1682.94	KFFQSNMRILVTGGAG	IGSHLVDKLMENEKNE	35	51	no	no	2;3	1.9067e-15		R	I	L	D	K	L	1	0	0	1	0	0	0	4	1	2	2	1	0	1	0	1	1	0	0	2	0	0	204750000	2572000	4075600	3016600	23770000	20114000
A5BIN1	tr|A5AXR4|A5AXR4_VITVI	NEVIVADNYFTGSK	14	8	86.497	1555.75	DKLMENEKNEVIVADN	DNYFTGSKDNLKKWIG	58	71	no	no	2	0.00018851		K	N	E	S	K	D	1	0	2	1	0	0	1	1	0	1	0	1	0	1	0	1	1	0	1	2	0	0	95255000	2063900	0	0	12260000	9585900
A5BIN1	tr|A5AXR4|A5AXR4_VITVI	TNVIGTLNMLGLAK	14	7	63.682	1443.81	HNPVKTIKTNVIGTLN	LNMLGLAKRVGARILL	123	136	no	no	2	0.0017544	178	K	T	N	A	K	R	1	0	2	0	0	0	0	2	0	1	3	1	1	0	0	0	2	0	0	1	0	0	219060000	0	0	0	0	0
A5BIN1	tr|A5AXR4|A5AXR4_VITVI	VAETLMFDYHR	11	14	90.434	1380.65	SCYDEGKRVAETLMFD	TLMFDYHRQHGIEIRI	182	192	no	no	2;3	0.00011577	179	R	V	A	H	R	Q	1	1	0	1	0	0	1	0	1	0	1	0	1	1	0	0	1	0	1	1	0	0	280470000	4088000	1969600	1523100	30494000	11345000
A5BIN1	tr|A5AXR4|A5AXR4_VITVI	IFNTYGPR	8	22	147.04	966.492	GIEIRIARIFNTYGPR	IFNTYGPRMNIDDGRV	203	210	no	no	2	7.837e-15		R	I	F	P	R	M	0	1	1	0	0	0	0	1	0	1	0	0	0	1	1	0	1	0	1	0	0	0	425160000	8593100	9837400	7896400	37750000	37162000
A5BIQ8	tr|A5BIQ8|A5BIQ8_VITVI	AIYQDDVER	9	11	82.287	1107.52	DLLAKPTKAIYQDDVE	IYQDDVERVEA_____	262	270	yes	yes	2	0.0045481		K	A	I	E	R	V	1	1	0	2	0	1	1	0	0	1	0	0	0	0	0	0	0	0	1	1	0	0	69826000	4807600	1441400	1051300	6610000	10164000
A5BIQ8	tr|A5BIQ8|A5BIQ8_VITVI	EHQIIDTLVGPSLK	14	5	148.57	1548.85	YLHSLPIKEHQIIDTL	TLVGPSLKDEVMKIMP	73	86	yes	yes	2;3	7.9695e-37		K	E	H	L	K	D	0	0	0	1	0	1	1	1	1	2	2	1	0	0	1	1	1	0	0	1	0	0	96022000	0	0	0	8084000	5440800
A5BIQ8	tr|A5BIQ8|A5BIQ8_VITVI	EHQIIDTLVGPSLKDEVMK	19	13	140.2	2151.12	YLHSLPIKEHQIIDTL	SLKDEVMKIMPVQKQT	73	91	yes	yes	3	5.6888e-57	209	K	E	H	M	K	I	0	0	0	2	0	1	2	1	1	2	2	2	1	0	1	1	1	0	0	2	0	1	207790000	385920	0	0	14588000	6059200
A5BIQ8	tr|A5BIQ8|A5BIQ8_VITVI	KVLQFAGIEDVFTSSR	16	33	132.84	1795.95	IVAARVPKKVLQFAGI	EDVFTSSRGSTKTLGN	195	210	yes	yes	2;3	1.1408e-30		K	K	V	S	R	G	1	1	0	1	0	1	1	1	0	1	1	1	0	2	0	2	1	0	0	2	0	1	177180000	0	0	849490	23437000	6098700
A5BIQ8	tr|A5BIQ8|A5BIQ8_VITVI	LSVIPVR	7	26	109.11	782.501	RGAIILAKLSVIPVRR	KLSVIPVRRGYWGNKI	143	149	yes	yes	2	0.015079		K	L	S	V	R	R	0	1	0	0	0	0	0	0	0	1	1	0	0	0	1	1	0	0	0	2	0	0	751730000	6134700	4939800	5033300	89224000	69419000
A5BIQ8	tr|A5BIQ8|A5BIQ8_VITVI	REEEEKWVPVTK	12	5	145	1528.79	GRRRSAGRREEEEKWV	EKWVPVTKLGRLVKDG	37	48	yes	yes	3	6.6247e-21		R	R	E	T	K	L	0	1	0	0	0	0	4	0	0	0	0	2	0	0	1	0	1	1	0	2	0	2	97343000	0	0	0	7891100	6151100
A5BIQ8	tr|A5BIQ8|A5BIQ8_VITVI	SPFQEHTDLLAK	12	1	72.659	1384.7	WRETRYTKSPFQEHTD	EHTDLLAKPTKAIYQD	247	258	yes	yes	2	0.00084269		K	S	P	A	K	P	1	0	0	1	0	1	1	0	1	0	2	1	0	1	1	1	1	0	0	0	0	0	5313900	0	0	0	0	0
A5BIQ8	tr|A5BIQ8|A5BIQ8_VITVI	SPFQEHTDLLAKPTK	15	16	107.03	1710.89	WRETRYTKSPFQEHTD	DLLAKPTKAIYQDDVE	247	261	yes	yes	2;3	1.2063e-11		K	S	P	T	K	A	1	0	0	1	0	1	1	0	1	0	2	2	0	1	2	1	2	0	0	0	0	1	151690000	3491500	2716300	2918500	12855000	3840300
A5BIQ8	tr|A5BIQ8|A5BIQ8_VITVI	TVEEIYLHSLPIK	13	22	176.25	1540.85	LVKDGKIRTVEEIYLH	YLHSLPIKEHQIIDTL	60	72	yes	yes	2;3	1.6103e-53		R	T	V	I	K	E	0	0	0	0	0	0	2	0	1	2	2	1	0	0	1	1	1	0	1	1	0	0	213280000	2028100	4670400	2214400	36098000	25511000
A5BIQ8	tr|A5BIQ8|A5BIQ8_VITVI	TYAYLTPDFWR	11	28	145.28	1431.68	ATFDCLLKTYAYLTPD	YLTPDFWRETRYTKSP	230	240	yes	yes	2	3.2789e-20		K	T	Y	W	R	E	1	1	0	1	0	0	0	0	0	0	1	0	0	1	1	0	2	1	2	0	0	0	316870000	2314800	1801200	1142100	21752000	18898000
A5BIQ8	tr|A5BIQ8|A5BIQ8_VITVI	VLQFAGIEDVFTSSR	15	2	131.4	1667.85	VAARVPKKVLQFAGIE	EDVFTSSRGSTKTLGN	196	210	yes	yes	2	2.9215e-29		K	V	L	S	R	G	1	1	0	1	0	1	1	1	0	1	1	0	0	2	0	2	1	0	0	2	0	0	51411000	0	0	0	0	0
A5BIW0	tr|A5BIW0|A5BIW0_VITVI	HLDEHLVNIGSK	12	2	119.25	1360.71	VGFEKTIKHLDEHLVN	HLVNIGSKGITKPKEV	282	293	yes	yes	3	5.327e-12		K	H	L	S	K	G	0	0	1	1	0	0	1	1	2	1	2	1	0	0	0	1	0	0	0	1	0	0	39598000	0	0	0	0	0
A5BJF0	tr|A5BJF0|A5BJF0_VITVI	VYIMTLGVLAPYR	13	1	55.261	1494.83	KKEGGAVRVYIMTLGV	LGVLAPYRGLGIGTKL	76	88	yes	yes	2	0.0015146	210	R	V	Y	Y	R	G	1	1	0	0	0	0	0	1	0	1	2	0	1	0	1	0	1	0	2	2	0	0	6288300	0	0	0	0	0
A5BKD0	tr|A5BKD0|A5BKD0_VITVI	HVTFENVDR	9	2	66.19	1115.54	LLVYDVTRHVTFENVD	VTFENVDRWLKELRDH	98	106	yes	yes	2	0.0096047		R	H	V	D	R	W	0	1	1	1	0	0	1	0	1	0	0	0	0	1	0	0	1	0	0	2	0	0	21036000	6781300	13400000	854660	0	0
A5BKD0	tr|A5BKD0|A5BKD0_VITVI	KALETGDEAATVPK	14	1	50.305	1428.75	QIYHVVSRKALETGDE	DEAATVPKGQTINVGK	181	194	yes	yes	3	0.00088436		R	K	A	P	K	G	3	0	0	1	0	0	2	1	0	0	1	2	0	0	1	0	2	0	0	1	0	1	11739000	1941000	0	629570	3955600	1870100
A5BKD0	tr|A5BKD0|A5BKD0_VITVI	VVKAQIWDTAGQER	14	9	142.38	1599.84	RSIRVDEKVVKAQIWD	WDTAGQERYRAITSAY	61	74	yes	no	2	2.9504e-30		K	V	V	E	R	Y	2	1	0	1	0	2	1	1	0	1	0	1	0	0	0	0	1	1	0	2	0	1	390940000	5141000	5733000	4081400	57844000	34833000
A5BKK3	tr|A5BKK3|A5BKK3_VITVI	VLGEGLLVVR	10	7	72.365	1053.65	NKHVVFGRVLGEGLLV	GEGLLVVRKIENVATG	155	164	yes	yes	2	0.0042463		R	V	L	V	R	K	0	1	0	0	0	0	1	2	0	0	3	0	0	0	0	0	0	0	0	3	0	0	46904000	0	1855400	0	11960000	3281400
A5BKX2	tr|A5BKX2|A5BKX2_VITVI	GFLPESQPIVVK	12	5	57.175	1312.74	GYVKVLGKGFLPESQP	ESQPIVVKAKLISKVA	112	123	yes	yes	2	0.0063053		K	G	F	V	K	A	0	0	0	0	0	1	1	1	0	1	1	1	0	1	2	1	0	0	0	2	0	0	64177000	0	0	0	14822000	10581000
A5BKX2	tr|A5BKX2|A5BKX2_VITVI	LWSLIPQEVK	10	6	52.6	1211.69	CPIVNVDKLWSLIPQE	SLIPQEVKAKASPENA	78	87	yes	yes	2	0.028364		K	L	W	V	K	A	0	0	0	0	0	1	1	0	0	1	2	1	0	0	1	1	0	1	0	1	0	0	68707000	0	882220	0	9734200	0
A5BKX2	tr|A5BE36|A5BE36_VITVI	ILFDKYHPGYFGK	13	3	49.298	1583.81	AGGMHHHRILFDKYHP	YHPGYFGKVGMRYFHK	43	55	no	no	3	0.0062728		R	I	L	G	K	V	0	0	0	1	0	0	0	2	1	1	1	2	0	2	1	0	0	0	2	0	0	1	24515000	0	0	0	0	0
A5BKY5	tr|A5BKY5|A5BKY5_VITVI	FLGVPEASR	9	3	63.216	974.519	PVSPALRKFLGVPEAS	LGVPEASRAEAVKKIW	62	70	yes	yes	2	0.012106		K	F	L	S	R	A	1	1	0	0	0	0	1	1	0	0	1	0	0	1	1	1	0	0	0	1	0	0	38143000	0	0	0	3210000	0
A5BKY5	tr|A5BKY5|A5BKY5_VITVI	LLSHHFIK	8	0	69.198	993.576	VGFLEIGKLLSHHFIK	LLSHHFIKTV______	119	126	yes	yes	2	0.065791		K	L	L	I	K	T	0	0	0	0	0	0	0	0	2	1	2	1	0	1	0	1	0	0	0	0	0	0	19175000	3155400	3898900	3237100	0	778580
A5BKY5	tr|A5BKY5|A5BKY5_VITVI	SGGITKPVPVSPALR	15	4	50.178	1477.86	TAAKGPPRSGGITKPV	VPVSPALRKFLGVPEA	46	60	yes	yes	2;3	0.0078069		R	S	G	L	R	K	1	1	0	0	0	0	0	2	0	1	1	1	0	0	3	2	1	0	0	2	0	1	57719000	0	0	0	3427800	0
A5BKY5	tr|A5BKY5|A5BKY5_VITVI	VGFLEIGK	8	1	52.867	861.496	SVFEGKDKVGFLEIGK	VGFLEIGKLLSHHFIK	111	118	yes	yes	2	0.065533		K	V	G	G	K	L	0	0	0	0	0	0	1	2	0	1	1	1	0	1	0	0	0	0	0	1	0	0	92273000	2785600	1991000	2031200	4350700	0
A5BL10	tr|A5BL10|A5BL10_VITVI	EGDTVLLPEYGGSQIK	16	15	101.53	1704.86	KVIPVGVKEGDTVLLP	EYGGSQIKLDDKEYHL	62	77	yes	yes	2	4.2414e-11		K	E	G	I	K	L	0	0	0	1	0	1	2	3	0	1	2	1	0	0	1	1	1	0	1	1	0	0	179630000	0	0	0	0	0
A5BL10	tr|A5BL10|A5BL10_VITVI	LDDKEYHLYR	10	1	47.844	1350.66	EYGGSQIKLDDKEYHL	DKEYHLYRDEDILGTL	78	87	yes	yes	3	0.021497		K	L	D	Y	R	D	0	1	0	2	0	0	1	0	1	0	2	1	0	0	0	0	0	0	2	0	0	1	7388700	0	0	0	0	0
A5BL10	tr|A5BL10|A5BL10_VITVI	LDDKEYHLYRDEDILGTLHD	20	4	74.029	2459.16	EYGGSQIKLDDKEYHL	DILGTLHD________	78	97	yes	yes	3	1.3838e-08		K	L	D	H	D	-	0	1	0	5	0	0	2	1	2	1	4	1	0	0	0	0	1	0	2	0	0	2	25899000	0	0	0	0	5349300
A5BL10	tr|A5BL10|A5BL10_VITVI	VIAVGPGLR	9	20	105.14	880.549	SPQLNSGKVIAVGPGL	IAVGPGLRDREGKVIP	41	49	yes	yes	2	0.00096925		K	V	I	L	R	D	1	1	0	0	0	0	0	2	0	1	1	0	0	0	1	0	0	0	0	2	0	0	451430000	2717300	3053200	2049000	26883000	30037000
A5BL10	tr|A5BL10|A5BL10_VITVI	VIPVGVK	7	1	60.358	710.469	GLRDREGKVIPVGVKE	KVIPVGVKEGDTVLLP	55	61	yes	yes	2	0.068432		K	V	I	V	K	E	0	0	0	0	0	0	0	1	0	1	0	1	0	0	1	0	0	0	0	3	0	0	208310000	0	0	0	15740000	16752000
A5BL10	tr|D7T1A7|D7T1A7_VITVI	LIPTLNR	7	12	103.29	825.507	________________	RLIPTLNRVLVEKIIP	5	11	no	no	2	0.015388		R	L	I	N	R	V	0	1	1	0	0	0	0	0	0	1	2	0	0	0	1	0	1	0	0	0	0	0	917430000	9197800	6266200	5694000	82850000	44469000
A5BL10	tr|D7T1A7|D7T1A7_VITVI	RLIPTLNR	8	7	103.8	981.608	________________	RLIPTLNRVLVEKIIP	4	11	no	no	2	0.01435		K	R	L	N	R	V	0	2	1	0	0	0	0	0	0	1	2	0	0	0	1	0	1	0	0	0	0	1	220170000	0	0	0	0	0
A5BL10	tr|A5BL10|A5BL10_VITVI	DEDILGTLHD	10	10	101.9	1126.51	DKEYHLYRDEDILGTL	DILGTLHD________	88	97	no	no	2	0.00017826		R	D	E	H	D	-	0	0	0	3	0	0	1	1	1	1	2	0	0	0	0	0	1	0	0	0	0	0	71696000	0	0	0	4342400	0
A5BL45	tr|A5BL45|A5BL45_VITVI	LGSQLDVIAPIKY	13	3	72.209	1415.8	AEKAAVDKLGSQLDVI	DVIAPIKY________	194	206	yes	yes	2	0.0029418		K	L	G	K	Y	-	1	0	0	1	0	1	0	1	0	2	2	1	0	0	1	1	0	0	1	1	0	1	31580000	302440	0	0	5827400	1974900
A5BL45	tr|A5BL45|A5BL45_VITVI	LSSEVGWNHYETIK	14	5	93.909	1661.8	HKYCLLGRLSSEVGWN	WNHYETIKELEKKRKE	146	159	yes	yes	2;3	9.9011e-06		R	L	S	I	K	E	0	0	1	0	0	0	2	1	1	1	1	1	0	0	0	2	1	1	1	1	0	0	131620000	0	0	0	17220000	6730500
A5BL45	tr|A5BL45|A5BL45_VITVI	AYEGIPPPYDK	11	14	65.695	1248.6	AAALARLKAYEGIPPP	GIPPPYDKMKRMVIPD	109	119	no	no	2	0.0042655		K	A	Y	D	K	M	1	0	0	1	0	0	1	1	0	1	0	1	0	0	3	0	0	0	2	0	0	0	106820000	1913700	1212700	965390	0	0
A5BL45	tr|A5BL45|A5BL45_VITVI	MNTKPSHGPIHFR	13	7	111.94	1520.77	YLRFLRKRMNTKPSHG	SHGPIHFRAPSKILWR	67	79	no	no	3;4	3.4269e-09	211	R	M	N	F	R	A	0	1	1	0	0	0	0	1	2	1	0	1	1	1	2	1	1	0	0	0	0	1	58915000	0	1244200	0	157290	171940
A5BL45	tr|A5BL45|A5BL45_VITVI	MVIPDALK	8	13	84.498	885.499	PPYDKMKRMVIPDALK	MVIPDALKVLRLQAGH	123	130	no	no	2	0.0025746	212	R	M	V	L	K	V	1	0	0	1	0	0	0	0	0	1	1	1	1	0	1	0	0	0	0	1	0	0	560950000	3550800	2461500	2712900	45200000	40060000
A5BL45	tr|A5BL45|A5BL45_VITVI	LASILAK	7	24	151.17	714.464	ARHHMLGRLASILAKE	RLASILAKELLNGQKV	24	30	no	no	2	6.8057e-05		R	L	A	A	K	E	2	0	0	0	0	0	0	0	0	1	2	1	0	0	0	1	0	0	0	0	0	0	824550000	8870100	7643000	5573800	61225000	79944000
A5BLT1	tr|A5BLT1|A5BLT1_VITVI	ALSHEFQALTK	11	1	96.059	1243.66	________________	HEFQALTKSFSGFGVD	2	12	yes	yes	2	5.503e-05		M	A	L	T	K	S	2	0	0	0	0	1	1	0	1	0	2	1	0	1	0	1	1	0	0	0	0	0	14101000	0	0	0	10271000	2103800
A5BLT1	tr|A5BLT1|A5BLT1_VITVI	NAVVLWTMHPWER	13	1	61.409	1637.81	KHEFLRLKNAVVLWTM	WTMHPWERDARLMKEA	74	86	yes	yes	2;3	0.0027742	213	K	N	A	E	R	D	1	1	1	0	0	0	1	0	1	0	1	0	1	0	1	0	1	2	0	2	0	0	38704000	0	0	0	12968000	4205900
A5BLT1	tr|A5BLT1|A5BLT1_VITVI	NPIEDEEVVR	10	11	99.985	1198.58	AIKNADKKNPIEDEEV	IEDEEVVRILTTRSKP	185	194	yes	yes	2	4.938e-07		K	N	P	V	R	I	0	1	1	1	0	0	3	0	0	1	0	0	0	0	1	0	0	0	0	2	0	0	76521000	0	0	0	17596000	16971000
A5BLT1	tr|A5BLT1|A5BLT1_VITVI	SSEQLLGAR	9	1	73.233	959.504	IIEVASTRSSEQLLGA	SEQLLGARRAYHSLFD	113	121	yes	yes	2	0.0061471		R	S	S	A	R	R	1	1	0	0	0	1	1	1	0	0	2	0	0	0	0	2	0	0	0	0	0	0	3252500	3252500	0	0	0	0
A5BLT1	tr|A5BLT1|A5BLT1_VITVI	TLFAAIK	7	1	60.788	762.464	EIAKSEAKTLFAAIKN	KTLFAAIKNADKKNPI	173	179	yes	yes	2	0.066657		K	T	L	I	K	N	2	0	0	0	0	0	0	0	0	1	1	1	0	1	0	0	1	0	0	0	0	0	43455000	0	0	0	14229000	6925700
A5BLT1	tr|D7SPZ3|D7SPZ3_VITVI	KLLVGLVSSYR	11	1	46.796	1233.74	YHINDSCRKLLVGLVS	VGLVSSYRYEGPKVNE	146	156	no	no	3	0.0061995		R	K	L	Y	R	Y	0	1	0	0	0	0	0	1	0	0	3	1	0	0	0	2	0	0	1	2	0	1	2184700	0	0	0	0	0
A5BLT1	tr|D7SPZ3|D7SPZ3_VITVI	LLVGLVSSYR	10	13	110.53	1105.65	HINDSCRKLLVGLVSS	VGLVSSYRYEGPKVNE	147	156	no	no	2	3.4136e-06		K	L	L	Y	R	Y	0	1	0	0	0	0	0	1	0	0	3	0	0	0	0	2	0	0	1	2	0	0	175540000	1159600	2872600	1528200	49324000	41744000
A5BM29	tr|A5BM29|A5BM29_VITVI	ANLANLYQESSMLTFEGQK	19	4	64.705	2143.03	YSTFDANRANLANLYQ	MLTFEGQKIQGSPNIV	23	41	yes	yes	2	1.4271e-10		R	A	N	Q	K	I	2	0	2	0	0	2	2	1	0	0	3	1	1	1	0	2	1	0	1	0	0	0	11997000	0	0	0	6427700	0
A5BM29	tr|A5BM29|A5BM29_VITVI	IQGSPNIVAK	10	2	73.841	1025.59	MLTFEGQKIQGSPNIV	GSPNIVAKLTSLPFQQ	42	51	yes	yes	2	0.0035446		K	I	Q	A	K	L	1	0	1	0	0	1	0	1	0	2	0	1	0	0	1	1	0	0	0	1	0	0	18758000	4712800	4253100	5997900	0	0
A5BM68	tr|A5BM68|A5BM68_VITVI	DGATDPTFLYFGHGLK	16	25	132.08	1737.84	SLVFAYYKDGATDPTF	LYFGHGLKEIKC____	148	163	yes	yes	2;3	8.5938e-30		K	D	G	L	K	E	1	0	0	2	0	0	0	3	1	0	2	1	0	2	1	0	2	0	1	0	0	0	131230000	589020	3998900	5897200	25660000	9663300
A5BM68	tr|A5BM68|A5BM68_VITVI	ELFNGALWEVEGK	13	3	78.401	1490.74	LSDSFPYKELFNGALW	ALWEVEGKWVVQGAID	22	34	yes	yes	2	0.00070119		K	E	L	G	K	W	1	0	1	0	0	0	3	2	0	0	2	1	0	1	0	0	0	1	0	1	0	0	20003000	963380	2133200	1650900	6538800	0
A5BM68	tr|A5BM68|A5BM68_VITVI	LQEQPPFDKK	10	11	50.452	1228.65	VDIVDTFRLQEQPPFD	EQPPFDKKQFVTYMKR	75	84	yes	yes	3	0.0064393		R	L	Q	K	K	Q	0	0	0	1	0	2	1	0	0	0	1	2	0	1	2	0	0	0	0	0	0	1	39441000	2488700	3073400	1471400	2114400	0
A5BM68	tr|A5BM68|A5BM68_VITVI	MLVYQDLLTADELLSDSFPYK	21	1	20.606	2460.21	________________	LSDSFPYKELFNGALW	1	21	yes	yes	3	0.015961		-	M	L	Y	K	E	1	0	0	3	0	1	1	0	0	0	5	1	1	1	1	2	1	0	2	1	0	0	7020600	0	0	0	5761900	0
A5BNP0	tr|A5BNP0|A5BNP0_VITVI	AEQLTEEQIAEFK	13	2	67.095	1534.75	________________	EEQIAEFKEAFSLFDK	2	14	yes	yes	2	0.0012851		M	A	E	F	K	E	2	0	0	0	0	2	4	0	0	1	1	1	0	1	0	0	1	0	0	0	0	0	30812000	0	0	0	4803900	5572300
A5BNR6	tr|A5BNR6|A5BNR6_VITVI	FLEMILPHVK	10	3	85.355	1225.69	SYFHLYPKFLEMILPH	EMILPHVKEGKVVYVE	296	305	yes	yes	2	0.0019128		K	F	L	V	K	E	0	0	0	0	0	0	1	0	1	1	2	1	1	1	1	0	0	0	0	1	0	0	6526800	0	0	0	4262700	2264100
A5BNR6	tr|A5BNR6|A5BNR6_VITVI	VLDSGHPNFSK	11	3	41.339	1199.59	ISGYGVAKVLDSGHPN	SGHPNFSKGDLVWGFT	87	97	yes	no	3	0.01372		K	V	L	S	K	G	0	0	1	1	0	0	0	1	1	0	1	1	0	1	1	2	0	0	0	1	0	0	9205200	1532000	1904400	728240	0	0
A5BNW5	tr|A5BNW5|A5BNW5_VITVI	AQVGVGPMSWDNTVAAYAQNYANQR	25	6	32.548	2710.26	LNAHNTARAQVGVGPM	AQNYANQRIGDCNLVH	40	64	yes	yes	3	0.0012943		R	A	Q	Q	R	I	5	1	3	1	0	3	0	2	0	0	0	0	1	0	1	1	1	1	2	3	0	0	14971000	7330800	4243300	3396800	0	0
A5BP48	tr|A5BP48|A5BP48_VITVI	AETNTLASIR	10	2	119.27	1074.57	________________	TNTLASIRKWIVEHKL	2	11	yes	yes	2	4.8345e-08		M	A	E	I	R	K	2	1	1	0	0	0	1	0	0	1	1	0	0	0	0	1	2	0	0	0	0	0	169600000	0	0	418410	13888000	0
A5BP48	tr|A5BP48|A5BP48_VITVI	FLDMDTPAHKD	11	0	61.344	1288.58	IKADRYAKFLDMDTPA	MDTPAHKD________	87	97	yes	yes	2	0.060402	214	K	F	L	K	D	-	1	0	0	3	0	0	0	0	1	0	1	1	1	1	1	0	1	0	0	0	0	1	14994000	4262600	7952700	0	0	0
A5BP92	tr|A5BP92|A5BP92_VITVI	IYAENAIR	8	9	71.877	948.503	KGNMDGARIYAENAIR	IYAENAIRKRTEQMNY	53	60	yes	yes	2	0.011977		R	I	Y	I	R	K	2	1	1	0	0	0	1	0	0	2	0	0	0	0	0	0	0	0	1	0	0	0	177760000	10863000	15229000	7983300	22484000	21807000
A5BP92	tr|A5BP92|A5BP92_VITVI	TEQMNYLR	8	1	56.434	1053.49	AENAIRKRTEQMNYLR	TEQMNYLRLSSRLDAV	63	70	yes	yes	2	0.021904		R	T	E	L	R	L	0	1	1	0	0	1	1	0	0	0	1	0	1	0	0	0	1	0	1	0	0	0	4151500	0	0	0	0	1957200
A5BPB2	tr|A5BPB2|A5BPB2_VITVI	AVSSGSPWYGPDR	13	27	141.13	1377.63	RKSVAKSKAVSSGSPW	SPWYGPDRVKYLGPFS	47	59	yes	yes	2	6.5078e-23		K	A	V	D	R	V	1	1	0	1	0	0	0	2	0	0	0	0	0	0	2	3	0	1	1	1	0	0	969030000	9868300	11351000	9285200	168880000	87181000
A5BPB2	tr|A5BPB2|A5BPB2_VITVI	YLGPFSGEPPSYLTGEFPGDYGWDTAGLSADPETFAK	37	29	70.71	3938.78	WYGPDRVKYLGPFSGE	ADPETFAKNRELEVIH	62	98	no	no	3	1.755e-25		K	Y	L	A	K	N	3	0	0	3	0	0	3	6	0	0	3	1	0	3	5	3	3	1	3	0	0	0	441110000	3802300	0	4388000	65120000	31131000
A5BQN6	tr|A5BQN6|A5BQN6_VITVI	FEDENFIK	8	10	121.09	1040.48	GESIYGAKFEDENFIK	FEDENFIKKHTGPGIL	90	97	yes	yes	2	0.0018345		K	F	E	I	K	K	0	0	1	1	0	0	2	0	0	1	0	1	0	2	0	0	0	0	0	0	0	0	161020000	0	0	0	0	0
A5BQN6	tr|A5BQN6|A5BQN6_VITVI	FEDENFIKK	9	6	117.7	1168.58	GESIYGAKFEDENFIK	EDENFIKKHTGPGILS	90	98	yes	yes	2;3	0.00060004		K	F	E	K	K	H	0	0	1	1	0	0	2	0	0	1	0	2	0	2	0	0	0	0	0	0	0	1	219020000	0	0	0	0	0
A5BQN6	tr|A5BQN6|A5BQN6_VITVI	HVVFGQVVEGMDVVK	15	12	156.17	1641.85	KTEWLDGKHVVFGQVV	VEGMDVVKAVEKVGSG	133	147	yes	yes	2;3	1.3652e-55		K	H	V	V	K	A	0	0	0	1	0	1	1	2	1	0	0	1	1	1	0	0	0	0	0	6	0	0	87464000	0	1059200	778180	0	0
A5BQN6	tr|A5BQN6|A5BQN6_VITVI	IVMELYADTTPR	12	81	165.35	1407.71	IGGAPAGRIVMELYAD	LYADTTPRTAENFRAL	20	31	yes	yes	2;3	1.7867e-35	215	R	I	V	P	R	T	1	1	0	1	0	0	1	0	0	1	1	0	1	0	1	0	2	0	1	1	0	0	1623900000	22005000	27127000	21689000	122170000	78351000
A5BQN6	tr|A5BQN6|A5BQN6_VITVI	VFFDVSIGGAPAGR	14	22	156	1391.72	________________	IGGAPAGRIVMELYAD	6	19	yes	yes	2	1.2964e-44		R	V	F	G	R	I	2	1	0	1	0	0	0	3	0	1	0	0	0	2	1	1	0	0	0	2	0	0	436820000	2991700	7318200	0	0	0
A5BQP3	tr|A5BQP3|A5BQP3_VITVI	LVTAGEEAELLVGMK	15	22	113.4	1558.83	VFPKNSARLVTAGEEA	AELLVGMKNDGESSLN	73	87	yes	yes	2;3	9.0522e-17	216	R	L	V	M	K	N	2	0	0	0	0	0	3	2	0	0	3	1	1	0	0	0	1	0	0	2	0	0	290460000	665390	1090900	0	10624000	6616800
A5BQP3	tr|A5BQP3|A5BQP3_VITVI	NDGESSLNVIAVK	13	21	152	1344.69	AELLVGMKNDGESSLN	SLNVIAVKASVHLPFN	88	100	yes	yes	2	1.7257e-29		K	N	D	V	K	A	1	0	2	1	0	0	1	1	0	1	1	1	0	0	0	2	0	0	0	2	0	0	330560000	0	2391400	1464700	15669000	16999000
A5BR24	tr|A5BR24|A5BR24_VITVI	ATTETVDALR	10	1	38.875	1075.55	MILLEGAKATTETVDA	TETVDALRTGASAMKA	95	104	yes	no	2	0.045439		K	A	T	L	R	T	2	1	0	1	0	0	1	0	0	0	1	0	0	0	0	0	3	0	0	1	0	0	0	0	0	0	0	0
A5BR24	tr|A5BR24|A5BR24_VITVI	LYEQQIEQLGNFQLR	15	3	132.65	1877.96	IQCLKRKRLYEQQIEQ	QLGNFQLRIHDQMILL	68	82	yes	no	2	1.8175e-29		R	L	Y	L	R	I	0	1	1	0	0	4	2	1	0	1	3	0	0	1	0	0	0	0	1	0	0	0	42274000	540870	1659900	1963300	10148000	6340500
A5BR49	tr|A5BR49|A5BR49_VITVI	GLLLPHTTTDQELQHLR	17	1	47.705	1971.05	RLCAGNKKGLLLPHTT	DQELQHLRNSLPDQVV	69	85	yes	yes	3	0.00074456		K	G	L	L	R	N	0	1	0	1	0	2	1	1	2	0	5	0	0	0	1	0	3	0	0	0	0	0	9661300	0	1092800	0	8568500	0
A5BR49	tr|A5BR49|A5BR49_VITVI	NSLPDQVVVQR	11	1	66.267	1253.67	DQELQHLRNSLPDQVV	PDQVVVQRIEEKLSAL	86	96	yes	yes	2	0.0040936		R	N	S	Q	R	I	0	1	1	1	0	2	0	0	0	0	1	0	0	0	1	1	0	0	0	3	0	0	55358000	0	0	0	18794000	8745500
A5BR79	tr|A5BR79|A5BR79_VITVI	LMGGGEEAVEMR	12	11	59.227	1277.57	KMQTAVERLMGGGEEA	GEEAVEMRSRGREVAG	423	434	yes	yes	2	0.0049919	217	R	L	M	M	R	S	1	1	0	0	0	0	3	3	0	0	1	0	2	0	0	0	0	0	0	1	0	0	91064000	3274200	1532400	2909200	11448000	14317000
A5BR79	tr|A5BR79|A5BR79_VITVI	LVTDVLR	7	21	105.39	814.491	AEQFLNEKLVTDVLRV	KLVTDVLRVGVRVGSM	384	390	yes	yes	2	0.0094712		K	L	V	L	R	V	0	1	0	1	0	0	0	0	0	0	2	0	0	0	0	0	1	0	0	2	0	0	110000000	0	2714800	2617200	17573000	15270000
A5BR79	tr|A5BR79|A5BR79_VITVI	PFIWVVGK	8	6	89.55	944.548	CALEASGRPFIWVVGK	PFIWVVGKVFQTVAGE	295	302	yes	yes	2	8.5753e-05		R	P	F	G	K	V	0	0	0	0	0	0	0	1	0	1	0	1	0	1	1	0	0	1	0	2	0	0	9067700	0	0	0	2563500	0
A5BR79	tr|A5BR79|A5BR79_VITVI	SWKDEPTEVVGR	12	1	76.073	1401.69	RVGSMDWRSWKDEPTE	EPTEVVGREKMQTAVE	402	413	yes	yes	2	0.0061139		R	S	W	G	R	E	0	1	0	1	0	0	2	1	0	0	0	1	0	0	1	1	1	1	0	2	0	1	39174000	0	0	0	11717000	8134200
A5BR79	tr|A5BR79|A5BR79_VITVI	VFQTVAGEEENWLPSGYEER	20	3	70.094	2339.07	PFIWVVGKVFQTVAGE	LPSGYEERMVESKMGL	303	322	yes	yes	2	8.209e-07		K	V	F	E	R	M	1	1	1	0	0	1	5	2	0	0	1	0	0	1	1	1	1	1	1	2	0	0	60524000	0	2217900	0	10446000	4186900
A5BR79	tr|A5BR79|A5BR79_VITVI	VGSMDWR	7	2	77.058	849.38	DVLRVGVRVGSMDWRS	RVGSMDWRSWKDEPTE	395	401	yes	yes	2	0.0094712		R	V	G	W	R	S	0	1	0	1	0	0	0	1	0	0	0	0	1	0	0	1	0	1	0	1	0	0	0	0	0	0	0	0
A5BR79	tr|A5BR79|A5BR79_VITVI	WVADDVHELGIR	12	8	79.492	1408.71	VVTDMFHRWVADDVHE	DVHELGIRIIVFNGSG	116	127	yes	yes	3	7.8633e-05		R	W	V	I	R	I	1	1	0	2	0	0	1	1	1	1	1	0	0	0	0	0	0	1	0	2	0	0	60904000	1532500	2799700	1903500	10149000	13030000
A5BRL4	tr|A5BRL4|A5BRL4_VITVI	LVQNFELLPPPGQAK	15	0	42.095	1649.91	ILGITIGRLVQNFELL	LPPPGQAKLDTTGKGG	464	478	yes	yes	2	0.018303		R	L	V	A	K	L	1	0	1	0	0	2	1	1	0	0	3	1	0	1	3	0	0	0	0	1	0	0	22489000	0	2752400	1329700	5667500	3299900
A5BRL4	tr|A5BRL4|A5BRL4_VITVI	NLVVVSSPDLAK	12	4	52.576	1240.7	FMLRMGQRNLVVVSSP	VSSPDLAKDVLHTQGV	77	88	yes	yes	2	0.011363		R	N	L	A	K	D	1	0	1	1	0	0	0	0	0	0	2	1	0	0	1	2	0	0	0	3	0	0	16774000	2167400	2184700	1951300	0	4084400
A5BRN5	tr|A5BRN5|A5BRN5_VITVI	GEEVISMTVEGPPPPEESR	19	4	77.871	2038.95	TLGLVLLRGEEVISMT	PPPPEESRAKAVGAAA	75	93	yes	yes	2	9.2344e-09		R	G	E	S	R	A	0	1	0	0	0	0	5	2	0	1	0	0	1	0	4	2	1	0	0	2	0	0	13286000	0	0	0	0	0
A5BRN5	tr|A5BRN5|A5BRN5_VITVI	MLQYINYR	8	12	97.798	1099.55	MSMSKSSKMLQYINYR	MLQYINYRMRVTIQDG	9	16	yes	yes	2	0.0049761	218	K	M	L	Y	R	M	0	1	1	0	0	1	0	0	0	1	1	0	1	0	0	0	0	0	2	0	0	0	70581000	0	0	0	7554600	0
A5BRN5	tr|A5BRN5|A5BRN5_VITVI	TLGLVLLR	8	22	121.99	883.585	NEEREERRTLGLVLLR	TLGLVLLRGEEVISMT	67	74	yes	yes	2	0.0017667		R	T	L	L	R	G	0	1	0	0	0	0	0	1	0	0	4	0	0	0	0	0	1	0	0	1	0	0	101440000	0	0	0	7943600	3608100
A5BRS2	tr|A5BRS2|A5BRS2_VITVI	LHGVPFDANK	10	1	54.094	1096.57	SFAKLYVKLHGVPFDA	GVPFDANKFASRLWGD	344	353	yes	yes	2	0.02407		K	L	H	N	K	F	1	0	1	1	0	0	0	1	1	0	1	1	0	1	1	0	0	0	0	1	0	0	5275400	0	0	0	0	0
A5BRS2	tr|A5BRS2|A5BRS2_VITVI	SFVQFVLEPLYK	12	0	62.088	1468.8	PPASGGERSFVQFVLE	FVLEPLYKIYSQVIGE	383	394	yes	yes	2	0.010724		R	S	F	Y	K	I	0	0	0	0	0	1	1	0	0	0	2	1	0	2	1	1	0	0	1	2	0	0	27391000	0	0	0	0	0
A5BSB1	tr|A5BSB1|A5BSB1_VITVI	ADEISNIIR	9	2	80.231	1029.55	________________	DEISNIIRERIEQYNR	6	14	yes	no	2	0.004895		R	A	D	I	R	E	1	1	1	1	0	0	1	0	0	3	0	0	0	0	0	1	0	0	0	0	0	0	62523000	1616000	2150500	1609000	27543000	7463400
A5BSB1	tr|A5BSB1|A5BSB1_VITVI	ASSVAQVVTTFQER	14	6	151.22	1521.78	VYVAIGQKASSVAQVV	VVTTFQERGAMEYTIV	203	216	yes	no	2	2.1565e-37		K	A	S	E	R	G	2	1	0	0	0	2	1	0	0	0	0	0	0	1	0	2	2	0	0	3	0	0	283740000	0	7100300	3832900	68313000	60729000
A5BSB1	tr|A5BSB1|A5BSB1_VITVI	EAYPGDVFYLHSR	13	55	164.53	1552.73	LLRRPPGREAYPGDVF	DVFYLHSRLLERAAKS	285	297	yes	no	2;3	6.2778e-44		R	E	A	S	R	L	1	1	0	1	0	0	1	1	1	0	1	0	0	1	1	1	0	0	2	1	0	0	1255200000	14063000	20925000	23544000	316380000	252490000
A5BSB1	tr|A5BSB1|A5BSB1_VITVI	IAQIPVSEAYLGR	13	14	127.71	1415.78	SSVKATGRIAQIPVSE	VSEAYLGRVINALAKP	95	107	yes	no	2	1.2985e-18		R	I	A	G	R	V	2	1	0	0	0	1	1	1	0	2	1	0	0	0	1	1	0	0	1	1	0	0	283960000	4381000	5280000	3811100	87672000	57137000
A5BSB1	tr|A5BSB1|A5BSB1_VITVI	IVNTGTVLQVGDGIAR	16	7	130.02	1611.89	EQYNREVKIVNTGTVL	QVGDGIARIHGLDEVM	26	41	yes	no	2	1.5358e-29		K	I	V	A	R	I	1	1	1	1	0	1	0	3	0	2	1	0	0	0	0	0	2	0	0	3	0	0	69696000	0	1513400	0	28269000	15916000
A5BSB1	tr|A5BSB1|A5BSB1_VITVI	LIESPAPGIISR	12	18	101.32	1251.72	EISASESRLIESPAPG	PAPGIISRRSVYEPLQ	129	140	yes	no	2	2.33e-05		R	L	I	S	R	R	1	1	0	0	0	0	1	1	0	3	1	0	0	0	2	2	0	0	0	0	0	0	593950000	7785900	8028500	4947700	116920000	104190000
A5BSB1	tr|A5BSB1|A5BSB1_VITVI	RSVYEPLQTGLIAIDSMIPIGR	22	5	88.09	2428.31	PAPGIISRRSVYEPLQ	DSMIPIGRGQRELIIG	141	162	yes	no	3	8.0633e-18	98	R	R	S	G	R	G	1	2	0	1	0	1	1	2	0	4	2	0	1	0	2	2	1	0	1	1	0	1	52400000	0	0	0	27335000	3783100
A5BSB1	tr|A5BSB1|A5BSB1_VITVI	SVYEPLQTGLIAIDSMIPIGR	21	49	145.02	2272.21	APGIISRRSVYEPLQT	DSMIPIGRGQRELIIG	142	162	yes	no	2;3	2.8401e-80	98	R	S	V	G	R	G	1	1	0	1	0	1	1	2	0	4	2	0	1	0	2	2	1	0	1	1	0	0	504640000	4101000	5916000	4076200	121360000	77635000
A5BSB1	tr|A5BSB1|A5BSB1_VITVI	TFTEEAETLLK	11	3	107.06	1280.65	QEIISSTKTFTEEAET	EEAETLLKETIQEQME	481	491	yes	no	2	2.7916e-05		K	T	F	L	K	E	1	0	0	0	0	0	3	0	0	0	2	1	0	1	0	0	3	0	0	0	0	0	46953000	0	0	0	15887000	8630400
A5BSB1	tr|A5BSB1|A5BSB1_VITVI	TFTEEAETLLKETIQEQMER	20	1	67.928	2425.17	QEIISSTKTFTEEAET	TIQEQMERFLLQEQA_	481	500	yes	no	3	8.1585e-12		K	T	F	E	R	F	1	1	0	0	0	2	6	0	0	1	2	1	1	1	0	0	4	0	0	0	0	1	0	0	0	0	0	0
A5BSB1	tr|A5BSB1|A5BSB1_VITVI	TNKPQFQEIISSTK	14	2	66.436	1619.85	AELRNYLKTNKPQFQE	QEIISSTKTFTEEAET	467	480	yes	no	2	0.015325		K	T	N	T	K	T	0	0	1	0	0	2	1	0	0	2	0	2	0	1	1	2	2	0	0	0	0	1	16857000	0	0	0	5562000	5048200
A5BSD9	tr|A5BSD9|A5BSD9_VITVI	SLNLEENSFSSR	12	18	102.73	1381.65	VLFKAMAKSLNLEENS	EENSFSSRFGERAVMQ	193	204	yes	yes	2	1.8732e-05		K	S	L	S	R	F	0	1	2	0	0	0	2	0	0	0	2	0	0	1	0	4	0	0	0	0	0	0	130290000	0	0	1532900	14926000	8807000
A5BSD9	tr|A5BSD9|A5BSD9_VITVI	IIMDVLFK	8	8	69.825	977.562	DEYGTKVKIIMDVLFK	IIMDVLFKAMAKSLNL	181	188	yes	no	2	0.014419		K	I	I	F	K	A	0	0	0	1	0	0	0	0	0	2	1	1	1	1	0	0	0	0	0	1	0	0	38449000	0	0	0	0	0
A5BSR0	tr|A5BSR0|A5BSR0_VITVI	AAAIGANNQAAQSMLK	16	9	151.07	1557.79	SGNYGGWKAAAIGANN	QAAQSMLKQDYKDDIS	161	176	yes	yes	2	8.7687e-49	219	K	A	A	L	K	Q	6	0	2	0	0	2	0	1	0	1	1	1	1	0	0	1	0	0	0	0	0	0	91480000	1229200	1405000	1066000	27299000	20818000
A5BSR0	tr|A5BSR0|A5BSR0_VITVI	TTIFSPEGR	9	6	108.43	1006.51	MSRRYDSRTTIFSPEG	TIFSPEGRLYQVEYAM	9	17	yes	yes	2	0.0003525		R	T	T	G	R	L	0	1	0	0	0	0	1	1	0	1	0	0	0	1	1	1	2	0	0	0	0	0	68588000	2622500	6260000	4118000	18111000	12485000
A5BTD4	tr|A5BTD4|A5BTD4_VITVI	ATVPLNADVYNSPESNPVPSAGR	23	11	72.99	2354.15	AGVGDSIKATVPLNAD	NPVPSAGRFRTDISEL	155	177	yes	yes	2;3	1.0486e-13		K	A	T	G	R	F	3	1	3	1	0	0	1	1	0	0	1	0	0	0	4	3	1	0	1	3	0	0	187130000	1845500	6677800	2887300	11317000	8318800
A5BTD4	tr|A5BTD4|A5BTD4_VITVI	FYNGLLPR	8	5	102.71	978.529	ANSNNAYRFYNGLLPR	FYNGLLPRLAGNIGTP	285	292	yes	yes	2	0.0063225		R	F	Y	P	R	L	0	1	1	0	0	0	0	1	0	0	2	0	0	1	1	0	0	0	1	0	0	0	24352000	0	0	0	3348900	2083300
A5BTD4	tr|A5BTD4|A5BTD4_VITVI	SIAPGNFER	9	1	68.557	989.493	GLIDEDAKSIAPGNFE	IAPGNFERHWGIFKYD	320	328	yes	yes	2	0.011075		K	S	I	E	R	H	1	1	1	0	0	0	1	1	0	1	0	0	0	1	1	1	0	0	0	0	0	0	0	0	0	0	0	0
A5BTD4	tr|A5BTD4|A5BTD4_VITVI	YALDLSGQGQNK	12	1	79.492	1292.64	FKYDGQPKYALDLSGQ	LSGQGQNKLLVAAKDV	341	352	yes	yes	2	0.0037915		K	Y	A	N	K	L	1	0	1	1	0	2	0	2	0	0	2	1	0	0	0	1	0	0	1	0	0	0	13755000	0	0	0	0	0
A5BTW0	tr|A5BTW0|A5BTW0_VITVI	EFVAFLSAFSSR	12	1	40.475	1359.68	MLDGLNFKEFVAFLSA	FLSAFSSRATLQQKIE	78	89	yes	yes	2	0.031516		K	E	F	S	R	A	2	1	0	0	0	0	1	0	0	0	1	0	0	3	0	3	0	0	0	1	0	0	0	0	0	0	0	0
A5BTW0	tr|A5BTW0|A5BTW0_VITVI	VTFDDMLNVLR	11	4	68.536	1321.67	YDSSANGKVTFDDMLN	DDMLNVLRDLTGQFIS	111	121	yes	yes	2	0.0034116		K	V	T	L	R	D	0	1	1	2	0	0	0	0	0	0	2	0	1	1	0	0	1	0	0	2	0	0	8759700	0	0	0	0	0
A5BTZ8	tr|A5BTZ8|A5BTZ8_VITVI	AFAGWGTNEGLIISILAHR	19	2	157.54	2025.08	EDCEQLRKAFAGWGTN	IISILAHRNAAQIKSI	16	34	yes	yes	3	6.8776e-107		K	A	F	H	R	N	3	1	1	0	0	0	1	3	1	3	2	0	0	1	0	1	1	1	0	0	0	0	6030300	0	0	0	0	0
A5BTZ8	tr|A5BTZ8|A5BTZ8_VITVI	AQINATLNHYK	11	39	183.85	1271.66	RILATRSKAQINATLN	NATLNHYKNEFGNDIN	192	202	yes	yes	2;3	4.2065e-53		K	A	Q	Y	K	N	2	0	2	0	0	1	0	0	1	1	1	1	0	0	0	0	1	0	1	0	0	0	1992000000	25832000	8442600	21858000	274430000	346660000
A5BTZ8	tr|A5BTZ8|A5BTZ8_VITVI	AQINATLNHYKNEFGNDINK	20	1	38.377	2303.13	RILATRSKAQINATLN	EFGNDINKDLKTDPKD	192	211	yes	yes	3	0.0023168		K	A	Q	N	K	D	2	0	5	1	0	1	1	1	1	2	1	2	0	1	0	0	1	0	1	0	0	1	17441000	0	0	0	0	8373400
A5BTZ8	tr|A5BTZ8|A5BTZ8_VITVI	AYNHEDVIR	9	7	93.096	1115.54	LHEKISEKAYNHEDVI	YNHEDVIRILATRSKA	176	184	yes	yes	2	0.0028129		K	A	Y	I	R	I	1	1	1	1	0	0	1	0	1	1	0	0	0	0	0	0	0	0	1	1	0	0	6195800	0	0	0	518340	924860
A5BTZ8	tr|A5BTZ8|A5BTZ8_VITVI	DAFLANEATK	10	37	127.83	1078.53	WTLDPAERDAFLANEA	FLANEATKRWTSSNQV	81	90	yes	yes	2	1.2339e-07		R	D	A	T	K	R	3	0	1	1	0	0	1	0	0	0	1	1	0	1	0	0	1	0	0	0	0	0	2399600000	57300000	55779000	40673000	363350000	282970000
A5BTZ8	tr|A5BTZ8|A5BTZ8_VITVI	DAFLANEATKR	11	35	170.68	1234.63	WTLDPAERDAFLANEA	LANEATKRWTSSNQVL	81	91	yes	yes	2;3	7.8667e-42		R	D	A	K	R	W	3	1	1	1	0	0	1	0	0	0	1	1	0	1	0	0	1	0	0	0	0	1	1799500000	7817400	7409500	4670500	280410000	311500000
A5BTZ8	tr|A5BTZ8|A5BTZ8_VITVI	DEFLAILR	8	32	183.74	975.539	KDLKTDPKDEFLAILR	DEFLAILRATVKCLTR	219	226	yes	yes	2	4.8486e-68		K	D	E	L	R	A	1	1	0	1	0	0	1	0	0	1	2	0	0	1	0	0	0	0	0	0	0	0	498000000	0	6546700	5476600	90712000	0
A5BTZ8	tr|A5BTZ8|A5BTZ8_VITVI	DLKTDPKDEFLAILR	15	9	110.35	1772.97	EFGNDINKDLKTDPKD	DEFLAILRATVKCLTR	212	226	yes	yes	3	2.0206e-24		K	D	L	L	R	A	1	1	0	3	0	0	1	0	0	1	3	2	0	1	1	0	1	0	0	0	0	2	63516000	0	1386700	1079100	15585000	0
A5BTZ8	tr|A5BTZ8|A5BTZ8_VITVI	DLNKELSNDFER	12	2	89.747	1478.7	TYGEDLLKDLNKELSN	ELSNDFERVVLLWTLD	57	68	yes	yes	2;3	8.4025e-05		K	D	L	E	R	V	0	1	2	2	0	0	2	0	0	0	2	1	0	1	0	1	0	0	0	0	0	1	57198000	0	0	1354100	17423000	4748900
A5BTZ8	tr|A5BTZ8|A5BTZ8_VITVI	ELSNDFER	8	23	100.02	1008.45	DLLKDLNKELSNDFER	ELSNDFERVVLLWTLD	61	68	yes	yes	2	0.0066217		K	E	L	E	R	V	0	1	1	1	0	0	2	0	0	0	1	0	0	1	0	1	0	0	0	0	0	0	513810000	24610000	21656000	15621000	67430000	42682000
A5BTZ8	tr|A5BTZ8|A5BTZ8_VITVI	ISEKAYNHEDVIR	13	2	88.075	1572.79	EAKILHEKISEKAYNH	YNHEDVIRILATRSKA	172	184	yes	yes	3	8.4432e-05		K	I	S	I	R	I	1	1	1	1	0	0	2	0	1	2	0	1	0	0	0	1	0	0	1	1	0	1	25317000	0	0	0	4263800	4974000
A5BTZ8	tr|A5BTZ8|A5BTZ8_VITVI	KLLVPLVGTYR	11	31	119.27	1257.78	YHTSGDFRKLLVPLVG	VPLVGTYRYEGEEVNM	140	150	yes	yes	2;3	5.3194e-11		R	K	L	Y	R	Y	0	1	0	0	0	0	0	1	0	0	3	1	0	0	1	0	1	0	1	2	0	1	435410000	1911400	0	1319500	77699000	72885000
A5BTZ8	tr|A5BTZ8|A5BTZ8_VITVI	LLVPLVGTYR	10	45	169.41	1129.69	HTSGDFRKLLVPLVGT	VPLVGTYRYEGEEVNM	141	150	yes	yes	2	7.4317e-27		K	L	L	Y	R	Y	0	1	0	0	0	0	0	1	0	0	3	0	0	0	1	0	1	0	1	2	0	0	2780000000	9634600	20869000	21421000	482690000	323900000
A5BTZ8	tr|A5BTZ8|A5BTZ8_VITVI	LLVPLVGTYRYEGEEVNMTLAK	22	2	46.953	2494.31	HTSGDFRKLLVPLVGT	EVNMTLAKSEAKILHE	141	162	yes	yes	3	0.00011719		K	L	L	A	K	S	1	1	1	0	0	0	3	2	0	0	4	1	1	0	1	0	2	0	2	3	0	1	27428000	0	0	0	0	8848900
A5BTZ8	tr|A5BTZ8|A5BTZ8_VITVI	MLLALIGHGDA	11	29	113.62	1109.59	DTTGDYEKMLLALIGH	ALIGHGDA________	299	309	yes	yes	2	1.162e-15	220	K	M	L	D	A	-	2	0	0	1	0	0	0	2	1	1	3	0	1	0	0	0	0	0	0	0	0	0	619860000	18497000	21309000	13190000	134980000	95795000
A5BTZ8	tr|A5BTZ8|A5BTZ8_VITVI	NSVTLDHAIGK	11	38	186.27	1153.61	IKEEYHKRNSVTLDHA	TLDHAIGKDTTGDYEK	280	290	yes	yes	2;3	1.1744e-53		R	N	S	G	K	D	1	0	1	1	0	0	0	1	1	1	1	1	0	0	0	1	1	0	0	1	0	0	1588900000	40102000	44442000	23251000	189030000	187850000
A5BTZ8	tr|A5BTZ8|A5BTZ8_VITVI	NSVTLDHAIGKDTTGDYEK	19	1	66.536	2062.98	IKEEYHKRNSVTLDHA	DTTGDYEKMLLALIGH	280	298	yes	yes	3	6.7961e-11		R	N	S	E	K	M	1	0	1	3	0	0	1	2	1	1	1	2	0	0	0	1	3	0	1	1	0	1	0	0	0	0	0	0
A5BTZ8	tr|A5BTZ8|A5BTZ8_VITVI	QTYAQTYGEDLLK	13	24	197.25	1528.74	AAQIKSIRQTYAQTYG	TYGEDLLKDLNKELSN	44	56	yes	yes	2	8.4577e-92		R	Q	T	L	K	D	1	0	0	1	0	2	1	1	0	0	2	1	0	0	0	0	2	0	2	0	0	0	777700000	19415000	34446000	16746000	181290000	141320000
A5BTZ8	tr|A5BTZ8|A5BTZ8_VITVI	QTYAQTYGEDLLKDLNK	17	4	98.573	1998.99	AAQIKSIRQTYAQTYG	DLLKDLNKELSNDFER	44	60	yes	yes	3	9.0479e-11		R	Q	T	N	K	E	1	0	1	2	0	2	1	1	0	0	3	2	0	0	0	0	2	0	2	0	0	1	33251000	0	0	2381700	20561000	0
A5BTZ8	tr|A5BTZ8|A5BTZ8_VITVI	RNSVTLDHAIGK	12	2	89.231	1309.71	IIKEEYHKRNSVTLDH	TLDHAIGKDTTGDYEK	279	290	yes	yes	3	2.4509e-05		K	R	N	G	K	D	1	1	1	1	0	0	0	1	1	1	1	1	0	0	0	1	1	0	0	1	0	1	4152100	2337900	1814200	0	0	0
A5BTZ8	tr|A5BTZ8|A5BTZ8_VITVI	RSLEEDVAYHTSGDFR	16	0	29.422	1880.87	QAYHARFKRSLEEDVA	YHTSGDFRKLLVPLVG	124	139	yes	yes	3	0.014088		K	R	S	F	R	K	1	2	0	2	0	0	2	1	1	0	1	0	0	1	0	2	1	0	1	1	0	1	17267000	0	0	0	10621000	0
A5BTZ8	tr|A5BTZ8|A5BTZ8_VITVI	SLEEDVAYHTSGDFR	15	116	336.06	1724.76	AYHARFKRSLEEDVAY	YHTSGDFRKLLVPLVG	125	139	yes	yes	2;3	0		R	S	L	F	R	K	1	1	0	2	0	0	2	1	1	0	1	0	0	1	0	2	1	0	1	1	0	0	6014700000	66831000	63728000	65957000	912310000	705400000
A5BTZ8	tr|A5BTZ8|A5BTZ8_VITVI	SLEEDVAYHTSGDFRK	16	50	218.12	1852.86	AYHARFKRSLEEDVAY	HTSGDFRKLLVPLVGT	125	140	yes	yes	2;3;4	8.4274e-158		R	S	L	R	K	L	1	1	0	2	0	0	2	1	1	0	1	1	0	1	0	2	1	0	1	1	0	1	1622300000	9688100	12990000	10556000	142150000	219090000
A5BTZ8	tr|A5BTZ8|A5BTZ8_VITVI	TDPKDEFLAILR	12	63	181.98	1416.76	NDINKDLKTDPKDEFL	DEFLAILRATVKCLTR	215	226	yes	yes	2;3	2.8018e-54		K	T	D	L	R	A	1	1	0	2	0	0	1	0	0	1	2	1	0	1	1	0	1	0	0	0	0	1	1638900000	13518000	24060000	16135000	326540000	55086000
A5BTZ8	tr|A5BTZ8|A5BTZ8_VITVI	TSQQLLLAK	9	17	107.08	1000.59	LVEIACTRTSQQLLLA	SQQLLLAKQAYHARFK	107	115	yes	yes	1;2	0.00060591		R	T	S	A	K	Q	1	0	0	0	0	2	0	0	0	0	3	1	0	0	0	1	1	0	0	0	0	0	8136400000	155110000	111510000	82302000	920210000	1210000000
A5BTZ8	tr|A5BTZ8|A5BTZ8_VITVI	VVLLWTLDPAER	12	71	163.12	1410.79	ELSNDFERVVLLWTLD	WTLDPAERDAFLANEA	69	80	yes	yes	2;3	1.0259e-34		R	V	V	E	R	D	1	1	0	1	0	0	1	0	0	0	3	0	0	0	1	0	1	1	0	2	0	0	2810800000	37414000	44826000	38433000	807130000	476200000
A5BTZ8	tr|A5BTZ8|A5BTZ8_VITVI	VVLLWTLDPAERDAFLANEATK	22	17	96.55	2471.31	ELSNDFERVVLLWTLD	FLANEATKRWTSSNQV	69	90	yes	yes	3	4.9778e-21		R	V	V	T	K	R	4	1	1	2	0	0	2	0	0	0	4	1	0	1	1	0	2	1	0	2	0	1	113100000	3605100	3536000	1906100	19231000	15612000
A5BTZ8	tr|A5BTZ8|A5BTZ8_VITVI	VVLLWTLDPAERDAFLANEATKR	23	4	66.137	2627.41	ELSNDFERVVLLWTLD	LANEATKRWTSSNQVL	69	91	yes	yes	4	4.4381e-13		R	V	V	K	R	W	4	2	1	2	0	0	2	0	0	0	4	1	0	1	1	0	2	1	0	2	0	2	35181000	0	0	0	0	10333000
A5BTZ8	tr|A5BTZ8|A5BTZ8_VITVI	YEGEEVNMTLAK	12	46	145	1382.64	VPLVGTYRYEGEEVNM	EVNMTLAKSEAKILHE	151	162	yes	yes	2	2.8497e-21	221	R	Y	E	A	K	S	1	0	1	0	0	0	3	1	0	0	1	1	1	0	0	0	1	0	1	1	0	0	2344700000	37686000	44142000	32608000	443140000	294120000
A5BUI1	tr|A5BUI1|A5BUI1_VITVI	AASLSDGFTWMHVHQTWLEGSGAK	24	4	76.889	2615.22	TTVILRSRAASLSDGF	WLEGSGAKDQTNWLF_	394	417	yes	yes	3	1.3277e-18		R	A	A	A	K	D	3	0	0	1	0	1	1	3	2	0	2	1	1	1	0	3	2	2	0	1	0	0	17436000	0	0	0	0	2534400
A5BUI1	tr|A5BUI1|A5BUI1_VITVI	ALSELLEK	8	3	67.897	901.512	DKARDVMRALSELLEK	ALSELLEKRGLDVKII	145	152	yes	yes	2	0.016712		R	A	L	E	K	R	1	0	0	0	0	0	2	0	0	0	3	1	0	0	0	1	0	0	0	0	0	0	33639000	0	0	0	0	0
A5BUI1	tr|A5BUI1|A5BUI1_VITVI	IIYSGGMDLDILPQGAGK	18	0	50.178	1846.95	EKRGLDVKIIYSGGMD	ILPQGAGKGQALAYLL	159	176	yes	yes	2	0.0026093	222	K	I	I	G	K	G	1	0	0	2	0	1	0	4	0	3	2	1	1	0	1	1	0	0	1	0	0	0	14525000	0	0	0	0	0
A5BUI1	tr|A5BUI1|A5BUI1_VITVI	VSSAQISSDTWLVK	14	12	170.74	1519.79	SLRVWVDRVSSAQISS	SSDTWLVKFDKWELSG	357	370	yes	yes	2	1.604e-64		R	V	S	V	K	F	1	0	0	1	0	1	0	0	0	1	1	1	0	0	0	4	1	1	0	2	0	0	270240000	1235900	0	0	16470000	14755000
A5BUI1	tr|A5BUI1|A5BUI1_VITVI	FYLFYER	7	2	64.567	1036.5	NPGHEIVKFYLFYERW	KFYLFYERWRRAEVEN	290	296	yes	no	2	0.051048		K	F	Y	E	R	W	0	1	0	0	0	0	1	0	0	0	1	0	0	2	0	0	0	0	2	0	0	0	50765000	0	0	0	6059100	3317300
A5BUI1	tr|A5BUI1|A5BUI1_VITVI	GQALAYLLK	9	2	78.149	975.575	ILPQGAGKGQALAYLL	QALAYLLKKFKAEGKL	177	185	yes	no	2	0.0052464		K	G	Q	L	K	K	2	0	0	0	0	1	0	1	0	0	3	1	0	0	0	0	0	0	1	0	0	0	22081000	0	0	0	0	0
A5BV56	tr|A5BV56|A5BV56_VITVI	ELLSFYK	7	2	67.032	898.48	DLVEMELRELLSFYKF	RELLSFYKFPGDEIPI	207	213	yes	yes	2	0.04787		R	E	L	Y	K	F	0	0	0	0	0	0	1	0	0	0	2	1	0	1	0	1	0	0	1	0	0	0	28401000	0	0	0	8662600	6206500
A5BV56	tr|A5BV56|A5BV56_VITVI	FPGDEIPIIR	10	4	63.32	1155.63	RELLSFYKFPGDEIPI	GDEIPIIRGSALCALQ	214	223	yes	yes	2	0.010252		K	F	P	I	R	G	0	1	0	1	0	0	1	1	0	3	0	0	0	1	2	0	0	0	0	0	0	0	26430000	0	0	0	13140000	0
A5BV56	tr|A5BV56|A5BV56_VITVI	ILDQGQAGDNVGLLLR	16	21	147.64	1680.92	TGVEMFKKILDQGQAG	DNVGLLLRGLKREDIQ	320	335	yes	yes	2	1.3375e-47		K	I	L	L	R	G	1	1	1	2	0	2	0	3	0	1	4	0	0	0	0	0	0	0	0	1	0	0	134630000	2077000	3059200	2049100	32215000	8675900
A5BV56	tr|A5BV56|A5BV56_VITVI	TKPHVNVGTIGHVDHGK	17	11	101.92	1794.95	RSMGTFTRTKPHVNVG	IGHVDHGKTTLTAAIT	60	76	yes	yes	3;4;5	1.3129e-14		R	T	K	G	K	T	0	0	1	1	0	0	0	3	3	1	0	2	0	0	1	0	2	0	0	3	0	1	40605000	1113900	1217000	1551200	6575000	5963700
A5BV59	tr|A5BV59|A5BV59_VITVI	AETLVLR	7	3	91.906	800.476	________________	MAETLVLRGTMRAHTD	2	8	yes	yes	2	0.0015421		M	A	E	L	R	G	1	1	0	0	0	0	1	0	0	0	2	0	0	0	0	0	1	0	0	1	0	0	16391000	0	0	0	5777800	10613000
A5BV59	tr|A5BV59|A5BV59_VITVI	AHTDMVTAIATPIDNSDMIVTSSR	24	12	129.43	2545.22	LVLRGTMRAHTDMVTA	DMIVTSSRDKSIILWH	13	36	yes	yes	3	9.9752e-64	223;224	R	A	H	S	R	D	3	1	1	3	0	0	0	0	1	3	0	0	2	0	1	3	4	0	0	2	0	0	75788000	0	0	0	28217000	9374000
A5BV59	tr|A5BV59|A5BV59_VITVI	DGVILLWDLAEGK	13	20	113.52	1427.77	SLCASGGKDGVILLWD	LWDLAEGKRLYSLDAG	214	226	yes	yes	2	7.1517e-09		K	D	G	G	K	R	1	0	0	2	0	0	1	2	0	1	3	1	0	0	0	0	0	1	0	1	0	0	134540000	2202700	1273200	784220	24326000	29165000
A5BV59	tr|A5BV59|A5BV59_VITVI	DGVILLWDLAEGKR	14	9	79.614	1583.87	SLCASGGKDGVILLWD	WDLAEGKRLYSLDAGA	214	227	yes	yes	2;3	0.00010398		K	D	G	K	R	L	1	1	0	2	0	0	1	2	0	1	3	1	0	0	0	0	0	1	0	1	0	1	27236000	0	0	0	8675000	0
A5BV59	tr|A5BV59|A5BV59_VITVI	DKSIILWHLTK	11	2	51.463	1352.78	DMIVTSSRDKSIILWH	IILWHLTKDDKTYGVP	37	47	yes	yes	3	0.011209		R	D	K	T	K	D	0	0	0	1	0	0	0	0	1	2	2	2	0	0	0	1	1	1	0	0	0	1	21701000	0	0	0	5465100	3528700
A5BV59	tr|A5BV59|A5BV59_VITVI	DVLSVAFSVDNR	12	7	78.964	1320.67	RRFVGHTKDVLSVAFS	VAFSVDNRQIVSASRD	107	118	yes	yes	2	0.00040747		K	D	V	N	R	Q	1	1	1	2	0	0	0	0	0	0	1	0	0	1	0	2	0	0	0	3	0	0	17168000	359990	0	0	0	5241100
A5BV59	tr|A5BV59|A5BV59_VITVI	FSPNNLQPTIVSASWDR	17	34	146.81	1930.95	SDWVSCVRFSPNNLQP	IVSASWDRTVKVWNLT	157	173	yes	yes	2;3	5.1748e-58		R	F	S	D	R	T	1	1	2	1	0	1	0	0	0	1	1	0	0	1	2	3	1	1	0	1	0	0	482430000	3069000	8194600	4054600	135600000	33665000
A5BV59	tr|A5BV59|A5BV59_VITVI	IWDLESK	7	9	124.83	889.455	AATEQSIKIWDLESKS	KIWDLESKSIVEDLKV	259	265	yes	yes	1;2	0.015343		K	I	W	S	K	S	0	0	0	1	0	0	1	0	0	1	1	1	0	0	0	1	0	1	0	0	0	0	697670000	49463000	65615000	60253000	128510000	103440000
A5BV59	tr|A5BV59|A5BV59_VITVI	LWDLAAGTSAR	11	24	99.5	1159.6	GSWDGELRLWDLAAGT	LAAGTSARRFVGHTKD	89	99	yes	yes	2	0.00016873		R	L	W	A	R	R	3	1	0	1	0	0	0	1	0	0	2	0	0	0	0	1	1	1	0	0	0	0	685550000	11048000	12973000	7742800	113820000	176280000
A5BV59	tr|A5BV59|A5BV59_VITVI	SIVEDLK	7	5	85.212	802.444	KIWDLESKSIVEDLKV	KSIVEDLKVDLKTEAE	266	272	yes	yes	2	0.0054062		K	S	I	L	K	V	0	0	0	1	0	0	1	0	0	1	1	1	0	0	0	1	0	0	0	1	0	0	44040000	0	0	0	0	24857000
A5BV59	tr|A5BV59|A5BV59_VITVI	SIVEDLKVDLK	11	3	86.114	1257.72	KIWDLESKSIVEDLKV	EDLKVDLKTEAEKSED	266	276	yes	yes	3	0.00117		K	S	I	L	K	T	0	0	0	2	0	0	1	0	0	1	2	2	0	0	0	1	0	0	0	2	0	1	2254600	0	0	0	0	0
A5BV59	tr|A5BV59|A5BV59_VITVI	VWGIGRY	7	2	85.306	849.45	GYTDGVVRVWGIGRY_	RVWGIGRY________	321	327	yes	yes	2	0.048689		R	V	W	R	Y	-	0	1	0	0	0	0	0	2	0	1	0	0	0	0	0	0	0	1	1	1	0	1	32916000	0	0	822790	6858600	4048200
A5BV78	tr|A5BV78|A5BV78_VITVI	AAAGLDPKPEDYEGVDFWSTPER	23	6	52.898	2549.17	________________	DFWSTPERAGWLTKQG	7	29	yes	yes	3	1.0614e-05		R	A	A	E	R	A	3	1	0	3	0	0	3	2	0	0	1	1	0	1	3	1	1	1	1	1	0	1	30264000	0	0	0	0	0
A5BV91	tr|A5BV91|A5BV91_VITVI	APIEDPVK	8	2	67.897	867.47	GSYLGFKKAPIEDPVK	APIEDPVKTNKIPRQI	467	474	yes	yes	2	0.0088168		K	A	P	V	K	T	1	0	0	1	0	0	1	0	0	1	0	1	0	0	2	0	0	0	0	1	0	0	55010000	0	0	0	7418500	5872800
A5BV91	tr|A5BV91|A5BV91_VITVI	DIANYNQLETQDEAQEETGWK	21	15	90.464	2481.09	IMMRTLYRDIANYNQL	AQEETGWKLVHGDAFR	300	320	yes	yes	2;3	1.6672e-17		R	D	I	W	K	L	2	0	2	2	0	3	4	1	0	1	1	1	0	0	0	0	2	1	1	0	0	0	140880000	0	0	1079600	0	5263800
A5BV91	tr|A5BV91|A5BV91_VITVI	IENSIYTFQMR	11	18	80.69	1400.68	GEVLRGDRIENSIYTF	SIYTFQMREGQPCKVA	82	92	yes	yes	2	0.00029735	225	R	I	E	M	R	E	0	1	1	0	0	1	1	0	0	2	0	0	1	1	0	1	1	0	1	0	0	0	88054000	0	0	0	0	11410000
A5BV91	tr|A5BV91|A5BV91_VITVI	IMNSAENLGEVLR	13	12	119.39	1444.73	LKWCKPKKIMNSAENL	ENLGEVLRGDRIENSI	66	78	yes	yes	2	5.703e-13	226	K	I	M	L	R	G	1	1	2	0	0	0	2	1	0	1	2	0	1	0	0	1	0	0	0	1	0	0	72669000	0	0	0	3723800	2128600
A5BV91	tr|A5BV91|A5BV91_VITVI	VNMILDNLPVAVHR	14	6	67.838	1589.87	EKIDDEYRVNMILDNL	NLPVAVHRQRRDGSPS	123	136	yes	yes	2;3	0.00028145	227	R	V	N	H	R	Q	1	1	2	1	0	0	0	0	1	1	2	0	1	0	1	0	0	0	0	3	0	0	52967000	0	0	0	9901700	0
A5BVN4	tr|A5BVN4|A5BVN4_VITVI	GDLAVVVGR	9	1	53.756	884.508	KSEPGTIRGDLAVVVG	DLAVVVGRNIIHGSDG	187	195	yes	yes	2	0.027985		R	G	D	G	R	N	1	1	0	1	0	0	0	2	0	0	1	0	0	0	0	0	0	0	0	3	0	0	37119000	0	0	0	0	0
A5BVN4	tr|A5BVN4|A5BVN4_VITVI	GLIAEILSR	9	49	135.71	970.581	IKPDGVQRGLIAEILS	LIAEILSRFERKGFKL	100	108	yes	yes	2	1.0263e-06		R	G	L	S	R	F	1	1	0	0	0	0	1	1	0	2	2	0	0	0	0	1	0	0	0	0	0	0	1081800000	0	4305300	1467800	94670000	30273000
A5BVN4	tr|A5BVN4|A5BVN4_VITVI	TFIAIKPDGVQR	12	11	72.891	1343.76	LHATEMERTFIAIKPD	IKPDGVQRGLIAEILS	88	99	yes	yes	2;3	0.0009619		R	T	F	Q	R	G	1	1	0	1	0	1	0	1	0	2	0	1	0	1	1	0	1	0	0	1	0	1	237960000	6723900	5581000	6237200	32912000	28248000
A5BVQ5	tr|A5BVQ5|A5BVQ5_VITVI	AVIASNIMYVVGQYPK	16	9	133.48	1751.93	ITKGKDNKAVIASNIM	YVVGQYPKFLRAHWKF	542	557	yes	yes	2;3	4.0246e-30	228	K	A	V	P	K	F	2	0	1	0	0	1	0	1	0	2	0	1	1	0	1	1	0	0	2	3	0	0	55622000	0	0	0	0	0
A5BVQ5	tr|A5BVQ5|A5BVQ5_VITVI	ELQNNPDMWLQVVHILQSTQNLNTK	25	7	111.84	2962.5	TAADQILRELQNNPDM	STQNLNTKFFALQVLE	43	67	yes	yes	3	5.4605e-43		R	E	L	T	K	F	0	0	4	1	0	4	1	0	1	1	4	1	1	0	1	1	2	1	0	2	0	0	66546000	0	0	0	12630000	11185000
A5BVQ5	tr|A5BVQ5|A5BVQ5_VITVI	ESEVLSLFATIINK	14	19	136.6	1562.86	ARNVPDARESEVLSLF	LFATIINKYKGAMIED	801	814	yes	yes	2;3	1.7599e-30		R	E	S	N	K	Y	1	0	1	0	0	0	2	0	0	2	2	1	0	1	0	2	1	0	0	1	0	0	227020000	0	0	0	48429000	21076000
A5BVQ5	tr|A5BVQ5|A5BVQ5_VITVI	ETLIYLSHLDHEDTEK	16	1	50.178	1941.93	LVQYKIMRETLIYLSH	LDHEDTEKQMLKKLSK	463	478	yes	yes	3	0.00042815		R	E	T	E	K	Q	0	0	0	2	0	0	3	0	2	1	3	1	0	0	0	1	2	0	1	0	0	0	0	0	0	0	0	0
A5BVQ5	tr|A5BVQ5|A5BVQ5_VITVI	FFALQVLEGVIK	12	13	140.24	1362.79	STQNLNTKFFALQVLE	QVLEGVIKYRWNALPV	68	79	yes	yes	2	1.262e-16		K	F	F	I	K	Y	1	0	0	0	0	1	1	1	0	1	2	1	0	2	0	0	0	0	0	2	0	0	97970000	756330	0	0	11202000	9514300
A5BVQ5	tr|A5BVQ5|A5BVQ5_VITVI	FFPVPSYR	8	10	91.064	1011.52	PLLETLLKFFPVPSYR	FFPVPSYRNLTLQCLT	244	251	yes	yes	2	0.0064253		K	F	F	Y	R	N	0	1	0	0	0	0	0	0	0	0	0	0	0	2	2	1	0	0	1	1	0	0	150580000	967600	1577000	1669600	16342000	12775000
A5BVQ5	tr|A5BVQ5|A5BVQ5_VITVI	GAMIEDVPR	9	20	74.92	986.486	ATIINKYKGAMIEDVP	AMIEDVPRIFEASFQC	817	825	yes	yes	2	0.0057913	229	K	G	A	P	R	I	1	1	0	1	0	0	1	1	0	1	0	0	1	0	1	0	0	0	0	1	0	0	191460000	3003500	0	0	7494800	9513600
A5BVQ5	tr|A5BVQ5|A5BVQ5_VITVI	LIETFLDKAEDQPQIGK	17	4	83.37	1944.02	SVKRETLKLIETFLDK	EDQPQIGKQFVPPMMD	762	778	yes	yes	2;3	4.9602e-06		K	L	I	G	K	Q	1	0	0	2	0	2	2	1	0	2	2	2	0	1	1	0	1	0	0	0	0	1	97069000	0	0	0	7122500	0
A5BVQ5	tr|A5BVQ5|A5BVQ5_VITVI	LLSEEVFDFSR	11	13	111.52	1340.66	ENCMAILKLLSEEVFD	EEVFDFSRGEMTQQKI	164	174	yes	yes	2	1.1577e-06		K	L	L	S	R	G	0	1	0	1	0	0	2	0	0	0	2	0	0	2	0	2	0	0	0	1	0	0	204720000	902540	3086600	1867800	35718000	2290100
A5BVQ5	tr|A5BVQ5|A5BVQ5_VITVI	LMELPNQK	8	1	57.047	971.511	KRDEYLQRLMELPNQK	LMELPNQKWAEIIGQA	661	668	yes	yes	2	0.049691		R	L	M	Q	K	W	0	0	1	0	0	1	1	0	0	0	2	1	1	0	1	0	0	0	0	0	0	0	0	0	0	0	0	0
A5BVQ5	tr|A5BVQ5|A5BVQ5_VITVI	LNIILVQVLK	10	3	85.807	1151.76	RERLYVNKLNIILVQV	IILVQVLKHEWPARWR	121	130	yes	yes	2	0.0015579		K	L	N	L	K	H	0	0	1	0	0	1	0	0	0	2	3	1	0	0	0	0	0	0	0	2	0	0	6194200	0	0	0	0	0
A5BVQ5	tr|A5BVQ5|A5BVQ5_VITVI	LVMDSIIWAFR	11	24	167.09	1349.72	RLSSQQLKLVMDSIIW	DSIIWAFRHTERNIAE	877	887	yes	yes	2	4.8774e-34		K	L	V	F	R	H	1	1	0	1	0	0	0	0	0	2	1	0	1	1	0	1	0	1	0	1	0	0	176800000	0	0	0	19848000	11193000
A5BVQ5	tr|A5BVQ5|A5BVQ5_VITVI	MYSELISNSIAEGGPFASK	19	8	85.51	1999.96	LDMLNVYRMYSELISN	EGGPFASKTSYVKLLR	727	745	yes	yes	2	4.8388e-11		R	M	Y	S	K	T	2	0	1	0	0	0	2	2	0	2	1	1	1	1	1	4	0	0	1	0	0	0	46913000	0	0	0	4871000	5070400
A5BVQ5	tr|A5BVQ5|A5BVQ5_VITVI	NIAETGLNLLLEMLK	15	38	133.25	1670.93	WAFRHTERNIAETGLN	NLLLEMLKNFQASEFC	892	906	yes	yes	2;3	3.3897e-30	230	R	N	I	L	K	N	1	0	2	0	0	0	2	1	0	1	5	1	1	0	0	0	1	0	0	0	0	0	417300000	844950	0	619070	15385000	10908000
A5BVQ5	tr|A5BVQ5|A5BVQ5_VITVI	NYISEVIVQLSSNEASFR	18	14	137.45	2055.03	VEQRDGMKNYISEVIV	SSNEASFRRERLYVNK	95	112	yes	yes	3	1.2497e-47		K	N	Y	F	R	R	1	1	2	0	0	1	2	0	0	2	1	0	0	1	0	4	0	0	1	2	0	0	98876000	0	0	0	28530000	13311000
A5BVQ5	tr|A5BVQ5|A5BVQ5_VITVI	QFVPPMMDPVLGDYAR	16	23	70.197	1834.87	EDQPQIGKQFVPPMMD	PVLGDYARNVPDARES	779	794	yes	yes	2	1.7418e-05	231;232	K	Q	F	A	R	N	1	1	0	2	0	1	0	1	0	0	1	0	2	1	3	0	0	0	1	2	0	0	116640000	0	0	0	16186000	7218000
A5BVQ5	tr|A5BVQ5|A5BVQ5_VITVI	QSVDFLKDQDVIR	13	13	76.759	1561.81	AEIIGQARQSVDFLKD	LKDQDVIRTVLNILQT	678	690	yes	yes	3	0.00042279		R	Q	S	I	R	T	0	1	0	3	0	2	0	0	0	1	1	1	0	1	0	1	0	0	0	2	0	1	53923000	0	0	0	0	6654100
A5BVQ5	tr|A5BVQ5|A5BVQ5_VITVI	SFIPDLVSAAK	11	13	57.175	1146.63	HEWPARWRSFIPDLVS	PDLVSAAKTSETICEN	139	149	yes	yes	2	0.011425		R	S	F	A	K	T	2	0	0	1	0	0	0	0	0	1	1	1	0	1	1	2	0	0	0	1	0	0	268170000	1949500	2138300	0	42335000	16379000
A5BVQ5	tr|A5BVQ5|A5BVQ5_VITVI	TAADQILR	8	2	79.474	886.487	GTGSKEERTAADQILR	TAADQILRELQNNPDM	35	42	yes	yes	2	0.0081645		R	T	A	L	R	E	2	1	0	1	0	1	0	0	0	1	1	0	0	0	0	0	1	0	0	0	0	0	191150000	6055600	6322600	3624600	0	0
A5BVQ5	tr|A5BVQ5|A5BVQ5_VITVI	WAEIIGQAR	9	22	72.928	1042.56	LMELPNQKWAEIIGQA	AEIIGQARQSVDFLKD	669	677	yes	yes	2	0.0062969		K	W	A	A	R	Q	2	1	0	0	0	1	1	1	0	2	0	0	0	0	0	0	0	1	0	0	0	0	217490000	1881500	1786100	1629300	23540000	16663000
A5BVQ5	tr|A5BVQ5|A5BVQ5_VITVI	WNALPVEQR	9	12	81.771	1111.58	LEGVIKYRWNALPVEQ	NALPVEQRDGMKNYIS	82	90	yes	yes	2	0.0028026		R	W	N	Q	R	D	1	1	1	0	0	1	1	0	0	0	1	0	0	0	1	0	0	1	0	1	0	0	204010000	2803100	2256000	2006100	32748000	23808000
A5BX24	tr|A5BX24|A5BX24_VITVI	FAGVDMR	7	20	119.57	794.375	ILLLGRHRFAGVDMRI	RFAGVDMRIRVKGGGH	61	67	no	no	2	0.0011665		R	F	A	M	R	I	1	1	0	1	0	0	0	1	0	0	0	0	1	1	0	0	0	0	0	1	0	0	909690000	0	0	0	134050000	90317000
A5BX24	tr|A5BX24|A5BX24_VITVI	TLLVADPR	8	25	70.256	883.513	DILVRYDRTLLVADPR	TLLVADPRRCEPKKFG	116	123	no	no	2	0.013906		R	T	L	P	R	R	1	1	0	1	0	0	0	0	0	0	2	0	0	0	1	0	1	0	0	1	0	0	985440000	19566000	19018000	16819000	83342000	91479000
A5BX24	tr|A5BX24|A5BX24_VITVI	AVEPILLLGR	10	29	83.862	1079.67	EPEILRYKAVEPILLL	EPILLLGRHRFAGVDM	49	58	yes	no	2	0.001764		K	A	V	G	R	H	1	1	0	0	0	0	1	1	0	1	3	0	0	0	1	0	0	0	0	1	0	0	307980000	0	6312300	3942100	50259000	19136000
A5BX24	tr|A5BX24|A5BX24_VITVI	ALVAFYQK	8	28	128.86	938.523	AIRQSIAKALVAFYQK	ALVAFYQKYVDEQSKK	89	96	no	no	1;2	0.001046		K	A	L	Q	K	Y	2	0	0	0	0	1	0	0	0	0	1	1	0	1	0	0	0	0	1	1	0	0	657610000	8264300	8102400	6775600	69484000	43357000
A5BX24	tr|A5BX24|A5BX24_VITVI	GGGHTSQIYAIR	12	14	143.55	1258.64	VDMRIRVKGGGHTSQI	TSQIYAIRQSIAKALV	72	83	no	no	2;3	3.4237e-21		K	G	G	I	R	Q	1	1	0	0	0	1	0	3	1	2	0	0	0	0	0	1	1	0	1	0	0	0	238620000	15905000	16810000	9509900	0	0
A5BX41	tr|A5BX41|A5BX41_VITVI	VLFVPWVETDFR	12	6	72.29	1506.79	HADIDDGKVLFVPWVE	PWVETDFRTGEDPWWA	209	220	yes	yes	2	0.00090032		K	V	L	F	R	T	0	1	0	1	0	0	1	0	0	0	1	0	0	2	1	0	1	1	0	3	0	0	35783000	0	0	0	15155000	7796700
A5BX41	tr|A5BX41|A5BX41_VITVI	DALGNDVIADEWLK	14	7	107.97	1557.77	AGGGIVAKDALGNDVI	VIADEWLKTHGPGDRT	107	120	yes	no	2	1.8176e-09		K	D	A	L	K	T	2	0	1	3	0	0	1	1	0	1	2	1	0	0	0	0	0	1	0	1	0	0	71132000	0	1100300	0	28412000	17738000
A5BX41	tr|A5BX41|A5BX41_VITVI	GPAPLSLALAHADIDDGK	18	2	73.138	1759.91	NNQGRVVRGPAPLSLA	HADIDDGKVLFVPWVE	191	208	yes	no	2;3	5.1567e-06		R	G	P	G	K	V	4	0	0	3	0	0	0	2	1	1	3	1	0	0	2	1	0	0	0	0	0	0	50881000	0	0	0	22872000	9765900
A5BX54	tr|A5BX54|A5BX54_VITVI	FKDIFQEVYETQWK	14	11	83.633	1859.91	ILKKYDGRFKDIFQEV	EVYETQWKSKYEAAGI	225	238	yes	yes	2;3	0.00015344		R	F	K	W	K	S	0	0	0	1	0	2	2	0	0	1	0	2	0	2	0	0	1	1	1	1	0	1	57520000	0	1936500	1134800	7693200	7645500
A5BX54	tr|A5BX54|A5BX54_VITVI	VANPIVEMDGDEMTR	15	1	61.444	1675.75	________________	MDGDEMTRVFWKSIKD	8	22	yes	yes	2	0.0013542		K	V	A	T	R	V	1	1	1	2	0	0	2	1	0	1	0	0	2	0	1	0	1	0	0	2	0	0	0	0	0	0	0	0
A5BX54	tr|A5BX54|A5BX54_VITVI	YEAAGIWYEHR	11	2	45.28	1393.64	YETQWKSKYEAAGIWY	AGIWYEHRLIDDMVAY	241	251	yes	yes	2	0.04232		K	Y	E	H	R	L	2	1	0	0	0	0	2	1	1	1	0	0	0	0	0	0	0	1	2	0	0	0	7773600	888350	0	0	0	4241800
A5BX54	tr|A5BX54|A5BX54_VITVI	YFDLGLPHR	9	5	74.92	1116.57	PFLELDIKYFDLGLPH	FDLGLPHRDATDDKVT	43	51	yes	yes	2;3	0.0033133		K	Y	F	H	R	D	0	1	0	1	0	0	0	1	1	0	2	0	0	1	1	0	0	0	1	0	0	0	82159000	0	0	0	26999000	14411000
A5BX54	tr|A5BX54|A5BX54_VITVI	GGETSTNSIASIFAWSR	17	5	54.103	1782.85	RHFRVHQKGGETSTNS	ASIFAWSRGLAHRAKL	324	340	no	no	2	0.0018311		K	G	G	S	R	G	2	1	1	0	0	0	1	2	0	2	0	0	0	1	0	4	2	1	0	0	0	0	41475000	1461900	1428900	1678400	7462000	10684000
A5BX54	tr|A5BX54|A5BX54_VITVI	LLDFTEK	7	3	84.097	864.459	AKLDDNARLLDFTEKL	RLLDFTEKLEAACVGT	354	360	no	no	2	0.020167		R	L	L	E	K	L	0	0	0	1	0	0	1	0	0	0	2	1	0	1	0	0	1	0	0	0	0	0	47626000	1427600	2032900	1084000	11740000	12378000
A5BXT5	tr|A5BXT5|A5BXT5_VITVI	AVDGSYVFNK	10	16	119.22	1098.53	VTKYLYFKAVDGSYVF	DGSYVFNKGKVHKVPA	103	112	yes	yes	2	8.0247e-07		K	A	V	N	K	G	1	0	1	1	0	0	0	1	0	0	0	1	0	1	0	1	0	0	1	2	0	0	251100000	6258500	5356400	5049200	24095000	17269000
A5BXT5	tr|A5BXT5|A5BXT5_VITVI	DYNVDMIPK	9	20	92.239	1093.51	PASLGSSRDYNVDMIP	YNVDMIPKFMMANGTL	70	78	yes	yes	2	0.0023104	233	R	D	Y	P	K	F	0	0	1	2	0	0	0	0	0	1	0	1	1	0	1	0	0	0	1	1	0	0	386960000	2419500	2646600	1715700	36789000	38740000
A5BXT5	tr|A5BXT5|A5BXT5_VITVI	FFIFVQDYDENDPR	14	7	64.104	1803.81	FEKRRARKFFIFVQDY	DYDENDPRTHEGMDLT	142	155	yes	yes	2	0.0016606		K	F	F	P	R	T	0	1	1	3	0	1	1	0	0	1	0	0	0	3	1	0	0	0	1	1	0	0	42065000	0	0	0	8307800	17181000
A5BXT5	tr|A5BXT5|A5BXT5_VITVI	FQGGSPYIYPLYGLGELPQAFAR	23	27	103.58	2543.28	LYSESIARFQGGSPYI	ELPQAFARLSAVYGGT	218	240	yes	yes	2;3	2.1437e-34		R	F	Q	A	R	L	2	1	0	0	0	2	1	4	0	1	3	0	0	2	3	1	0	0	3	0	0	0	178760000	0	0	561090	28527000	23715000
A5BXT5	tr|A5BXT5|A5BXT5_VITVI	KFFIFVQDYDENDPR	15	2	71.08	1931.91	LFEKRRARKFFIFVQD	DYDENDPRTHEGMDLT	141	155	yes	yes	3	0.00013532		R	K	F	P	R	T	0	1	1	3	0	1	1	0	0	1	0	1	0	3	1	0	0	0	1	1	0	1	25909000	0	0	0	9297500	0
A5BXT5	tr|A5BXT5|A5BXT5_VITVI	LYSESIAR	8	1	74.301	937.487	IDTVKRMKLYSESIAR	LYSESIARFQGGSPYI	210	217	yes	yes	2	0.0098287		K	L	Y	A	R	F	1	1	0	0	0	0	1	0	0	1	1	0	0	0	0	2	0	0	1	0	0	0	103150000	2346900	2759400	1510100	14793000	19300000
A5BXT5	tr|A5BXT5|A5BXT5_VITVI	NDYYGGESSSLNLIQLWK	18	6	116.06	2086	LKVLHMDRNDYYGGES	LNLIQLWKRFKGNDKP	36	53	yes	yes	2	1.22e-21		R	N	D	W	K	R	0	0	2	1	0	1	1	2	0	1	3	1	0	0	0	3	0	1	2	0	0	0	96947000	0	0	1348400	7967500	0
A5BXT5	tr|A5BXT5|A5BXT5_VITVI	VHKVPANDVEALK	13	10	145.43	1418.79	SYVFNKGKVHKVPAND	ANDVEALKSPLMGLFE	115	127	yes	yes	3	2.954e-28		K	V	H	L	K	S	2	0	1	1	0	0	1	0	1	0	1	2	0	0	1	0	0	0	0	3	0	1	53181000	770120	0	486330	5253700	4568200
A5BXT5	tr|A5BXT5|A5BXT5_VITVI	VPANDVEALK	10	13	88.338	1054.57	FNKGKVHKVPANDVEA	ANDVEALKSPLMGLFE	118	127	yes	yes	2	0.0012899		K	V	P	L	K	S	2	0	1	1	0	0	1	0	0	0	1	1	0	0	1	0	0	0	0	2	0	0	239530000	3911800	6211900	4385500	21237000	18634000
A5BXT5	tr|A5BXT5|A5BXT5_VITVI	YGLDDNTIDFIGHAIALHR	19	2	104.88	2140.07	TTRELIAKYGLDDNTI	GHAIALHRDDCYLNEP	174	192	yes	yes	3	5.4832e-20		K	Y	G	H	R	D	2	1	1	3	0	0	0	2	2	3	2	0	0	1	0	0	1	0	1	0	0	0	41963000	0	0	0	10445000	5820400
A5BXT5	tr|A5BXT5|A5BXT5_VITVI	SPLMGLFEK	9	9	93.096	1020.53	ANDVEALKSPLMGLFE	PLMGLFEKRRARKFFI	128	136	yes	no	2	0.0018162	234	K	S	P	E	K	R	0	0	0	0	0	0	1	1	0	0	2	1	1	1	1	1	0	0	0	0	0	0	123080000	397660	0	1547500	10107000	3439200
A5BXT5	tr|A5BXT5|A5BXT5_VITVI	VLIHTDVTK	9	15	172.59	1024.59	MANGTLVRVLIHTDVT	LIHTDVTKYLYFKAVD	89	97	yes	no	2	9.493e-27		R	V	L	T	K	Y	0	0	0	1	0	0	0	0	1	1	1	1	0	0	0	0	2	0	0	2	0	0	567430000	7917600	7080100	4854700	51336000	41841000
A5BXV1	tr|A5BXV1|A5BXV1_VITVI	DLYGNIVLSGGTTMFPGIADR	21	2	33.79	2196.09	KCDVDIRKDLYGNIVL	MFPGIADRMSKEITAL	294	314	yes	yes	2	0.0057149		K	D	L	D	R	M	1	1	1	2	0	0	0	4	0	2	2	0	1	1	1	1	2	0	1	1	0	0	4535700	0	0	0	0	0
D7SKH2	tr|D7SKH2|D7SKH2_VITVI	AEYDESGPSIVHR	13	7	84.297	1458.67	FQQMWIAKAEYDESGP	SGPSIVHRKCF_____	361	373	no	no	2;3	0.00032312		K	A	E	H	R	K	1	1	0	1	0	0	2	1	1	1	0	0	0	0	1	2	0	0	1	1	0	0	63613000	0	1909600	2846200	14208000	9462900
F6HJM9	tr|F6HJM9|F6HJM9_VITVI	SYELPDGQVITIGAER	16	12	98.062	1746.88	KSSSAVEKSYELPDGQ	VITIGAERFRCPEVLF	241	256	no	no	2	5.8301e-08		K	S	Y	E	R	F	1	1	0	1	0	1	2	2	0	2	1	0	0	0	1	1	1	0	1	1	0	0	132910000	2238100	5582400	3923100	26474000	18938000
F6HJM9	tr|F6HJM9|F6HJM9_VITVI	GYSFTTTAER	10	32	99.568	1131.52	LMKILTERGYSFTTTA	SFTTTAEREIVRDMKE	199	208	no	no	2	0.00024856		R	G	Y	E	R	E	1	1	0	0	0	0	1	1	0	0	0	0	0	1	0	1	3	0	1	0	0	0	1737100000	53838000	73953000	44649000	555540000	249360000
A5BXZ0	tr|A5BXZ0|A5BXZ0_VITVI	MENLLGLLR	9	15	88.495	1057.6	________________	ENLLGLLRLRVRRGIN	1	9	yes	yes	2	0.00084053	237	-	M	E	L	R	L	0	1	1	0	0	0	1	1	0	0	4	0	1	0	0	0	0	0	0	0	0	0	23463000	0	0	258680	5911700	4256300
A5BYC0	tr|A5BYC0|A5BYC0_VITVI	AQFTEYIQK	9	19	83.948	1126.57	ASGEGGDRAQFTEYIQ	QFTEYIQKNVALYQFR	54	62	yes	yes	2	0.004267		R	A	Q	Q	K	N	1	0	0	0	0	2	1	0	0	1	0	1	0	1	0	0	1	0	1	0	0	0	169340000	4938500	4625800	3019700	37775000	34746000
A5BYC0	tr|A5BYC0|A5BYC0_VITVI	DIGPSLYYIDYIASLHK	17	17	106.93	1967	ILLAGYDKDIGPSLYY	DYIASLHKIEKGAFGY	109	125	yes	yes	2;3	1.9067e-15		K	D	I	H	K	I	1	0	0	2	0	0	0	1	1	3	2	1	0	0	1	2	0	0	3	0	0	0	124260000	0	0	1102900	44415000	19160000
A5BYC0	tr|A5BYC0|A5BYC0_VITVI	GAFGYGSYFSLAMMDR	16	1	48.623	1771.77	ASLHKIEKGAFGYGSY	FSLAMMDRHYHSGMTV	129	144	yes	yes	2	0.0011252	238	K	G	A	D	R	H	2	1	0	1	0	0	0	3	0	0	1	0	2	2	0	2	0	0	2	0	0	0	34066000	0	0	0	11982000	5480000
A5BYC0	tr|A5BYC0|A5BYC0_VITVI	GELATALR	8	12	107.01	829.466	AAAANFTRGELATALR	GELATALRKNPYAVNI	86	93	yes	yes	2	0.0017278		R	G	E	L	R	K	2	1	0	0	0	0	1	1	0	0	2	0	0	0	0	0	1	0	0	0	0	0	263310000	11241000	7490200	6803200	49929000	50671000
A5BYC0	tr|A5BYC0|A5BYC0_VITVI	KNPYAVNILLAGYDK	15	1	41.695	1677.91	GELATALRKNPYAVNI	ILLAGYDKDIGPSLYY	94	108	yes	yes	2;3	0.0020484		R	K	N	D	K	D	2	0	2	1	0	0	0	1	0	1	2	2	0	0	1	0	0	0	2	1	0	1	21092000	0	0	0	6614600	6789900
A5BYC0	tr|A5BYC0|A5BYC0_VITVI	LVVAPPNFVIK	11	21	72.59	1195.73	CIMEIRSRLVVAPPNF	APPNFVIKIVDKDGAR	170	180	yes	yes	2	0.0021933		R	L	V	I	K	I	1	0	1	0	0	0	0	0	0	1	1	1	0	1	2	0	0	0	0	3	0	0	337630000	431600	7871200	8900900	74972000	28640000
A5BYC0	tr|A5BYC0|A5BYC0_VITVI	NGIPLTTAAAANFTR	15	11	57.288	1516.8	NVALYQFRNGIPLTTA	AAAANFTRGELATALR	71	85	yes	yes	2	0.0022465		R	N	G	T	R	G	4	1	2	0	0	0	0	1	0	1	1	0	0	1	1	0	3	0	0	0	0	0	50129000	2585700	2948300	1746900	0	12535000
A5BYC0	tr|A5BYC0|A5BYC0_VITVI	NVALYQFR	8	3	89.296	1009.53	QFTEYIQKNVALYQFR	NVALYQFRNGIPLTTA	63	70	yes	yes	2	0.0065738		K	N	V	F	R	N	1	1	1	0	0	1	0	0	0	0	1	0	0	1	0	0	0	0	1	1	0	0	165090000	0	0	0	33245000	12924000
A5BYQ4	tr|A5BYQ4|A5BYQ4_VITVI	EQGIQEIQHQIGEVNEIFK	19	0	31.787	2238.13	NEAIIEEREQGIQEIQ	GEVNEIFKDLAVLVHE	188	206	yes	yes	3	0.013106		R	E	Q	F	K	D	0	0	1	0	0	4	4	2	1	4	0	1	0	1	0	0	0	0	0	1	0	0	19047000	0	0	0	7799100	0
A5BYQ4	tr|A5BYQ4|A5BYQ4_VITVI	LVNTLGTPK	9	14	73.233	941.555	TAVSTFQRLVNTLGTP	VNTLGTPKDTSELREK	47	55	yes	yes	2	0.004162		R	L	V	P	K	D	0	0	1	0	0	0	0	1	0	0	2	1	0	0	1	0	2	0	0	1	0	0	605440000	88164000	73947000	59844000	103000000	108750000
A5BYS8	tr|A5BYS8|A5BYS8_VITVI	GLQDPEVLAR	10	16	82.261	1096.59	LDLYNQARGLQDPEVL	QDPEVLARETVFSVSE	29	38	yes	yes	2	0.0019336		R	G	L	A	R	E	1	1	0	1	0	1	1	1	0	0	2	0	0	0	1	0	0	0	0	1	0	0	159430000	4561000	3790000	3819800	0	18339000
A5BZ08	tr|A5BZ08|A5BZ08_VITVI	EIQIMHHLSEHPNVVR	16	3	56.339	1937.99	EDYDDVWREIQIMHHL	SEHPNVVRIRGTYEDP	78	93	yes	yes	3;4	0.00028001		R	E	I	V	R	I	0	1	1	0	0	1	2	0	3	2	1	0	1	0	1	1	0	0	0	2	0	0	73816000	0	0	0	0	10904000
A5BZ08	tr|A5BZ08|A5BZ08_VITVI	LTAHEVLSHPWVVDDR	16	20	157.11	1872.95	LDRNPKKRLTAHEVLS	HPWVVDDRMAPDKPLD	277	292	yes	yes	2;3;4	8.4699e-57		R	L	T	D	R	M	1	1	0	2	0	0	1	0	2	0	2	0	0	0	1	1	1	1	0	3	0	0	228960000	0	0	0	34403000	38013000
A5BZ08	tr|A5BZ08|A5BZ08_VITVI	MAPDKPLDSAVLSR	14	5	64.52	1498.78	HPWVVDDRMAPDKPLD	LDSAVLSRLKQFSAMN	293	306	yes	yes	2;3	0.00080197	239	R	M	A	S	R	L	2	1	0	2	0	0	0	0	0	0	2	1	1	0	2	2	0	0	0	1	0	1	112890000	0	1720400	0	27445000	7083900
A5BZ08	tr|A5BZ08|A5BZ08_VITVI	MIDTDNSGTITFDELK	16	1	33.893	1798.83	GGLRELFKMIDTDNSG	TITFDELKDGLKRVGS	342	357	yes	yes	2	0.03386		K	M	I	L	K	D	0	0	1	3	0	0	1	1	0	2	1	1	1	1	0	1	3	0	0	0	0	0	8516300	0	0	0	4136100	0
A5BZ08	tr|A5BZ08|A5BZ08_VITVI	VGSELMESEIR	11	1	54.005	1248.6	ELKDGLKRVGSELMES	ELMESEIRDLMNAADI	363	373	yes	yes	2	0.015744		R	V	G	I	R	D	0	1	0	0	0	0	3	1	0	1	1	0	1	0	0	2	0	0	0	1	0	0	0	0	0	0	0	0
A5BZ08	tr|A5BZ08|A5BZ08_VITVI	VIAEGLSEEEIGGLR	15	20	173.44	1570.82	KLKKMALRVIAEGLSE	EEEIGGLRELFKMIDT	323	337	yes	yes	2	6.1852e-78		R	V	I	L	R	E	1	1	0	0	0	0	4	3	0	2	2	0	0	0	0	1	0	0	0	1	0	0	221820000	1817800	2692100	2106900	36105000	28654000
A5BZF5	tr|A5BZF5|A5BZF5_VITVI	IDNKFDLMYSK	11	2	43.297	1372.67	SVAEVFSRIDNKFDLM	KFDLMYSKRAFVHWYV	391	401	yes	yes	3	0.027715		R	I	D	S	K	R	0	0	1	2	0	0	0	0	0	1	1	2	1	1	0	1	0	0	1	0	0	1	14274000	2078900	0	1090600	6070700	0
A5BZF5	tr|F6HBQ3|F6HBQ3_VITVI	DVNAAVATIK	10	14	103.26	1000.56	YRGDVVPKDVNAAVAT	NAAVATIKTKRTIQFV	327	336	no	no	1;2	0.0031649		K	D	V	I	K	T	3	0	1	1	0	0	0	0	0	1	0	1	0	0	0	0	1	0	0	2	0	0	437660000	13861000	16399000	13361000	91160000	95896000
A5BZF5	tr|F6HBQ3|F6HBQ3_VITVI	EDLAALEK	8	3	66.27	887.46	EGEFSEAREDLAALEK	EDLAALEKDYEEVGAE	423	430	no	no	2	0.010288		R	E	D	E	K	D	2	0	0	1	0	0	2	0	0	0	2	1	0	0	0	0	0	0	0	0	0	0	134810000	0	0	0	62291000	0
A5BZF5	tr|F6HBQ3|F6HBQ3_VITVI	AFVHWYVGEGMEEGEFSEAR	20	20	118.72	2329.01	FDLMYSKRAFVHWYVG	EGEFSEAREDLAALEK	403	422	no	no	2;3	1.1934e-35	240	R	A	F	A	R	E	2	1	0	0	0	0	5	3	1	0	0	0	1	2	0	1	0	1	1	2	0	0	240520000	0	3496400	0	75053000	20124000
A5BZF5	tr|A5BZF5|A5BZF5_VITVI	TVGGGDDAFNTFFSETGAGK	20	3	63.302	1976.88	DGQMPSDKTVGGGDDA	FSETGAGKHVPRAVFV	41	60	no	no	2	1.5088e-05		K	T	V	G	K	H	2	0	1	2	0	0	1	5	0	0	0	1	0	3	0	1	3	0	0	1	0	0	22660000	1511400	2477100	2191100	0	6318000
A5BZF5	tr|F6HBQ3|F6HBQ3_VITVI	QLFHPEQLISGKEDAANNFAR	21	7	146.72	2384.19	EVRTGAYRQLFHPEQL	DAANNFARGHYTIGKE	85	105	no	no	3;4	1.1094e-80		R	Q	L	A	R	G	3	1	2	1	0	2	2	1	1	1	2	1	0	2	1	1	0	0	0	0	0	1	208590000	6515000	5887200	4831500	48326000	25202000
A5BZF5	tr|F6HBQ3|F6HBQ3_VITVI	QLFHPEQLISGK	12	62	243.37	1395.75	EVRTGAYRQLFHPEQL	PEQLISGKEDAANNFA	85	96	no	no	2;3	2.9884e-180		R	Q	L	G	K	E	0	0	0	0	0	2	1	1	1	1	2	1	0	1	1	1	0	0	0	0	0	0	957300000	27281000	27401000	18262000	155610000	265010000
A5BZF5	tr|F6HBQ3|F6HBQ3_VITVI	IHFMLSSYAPVISAEK	16	34	197.47	1791.92	TNLVPYPRIHFMLSSY	APVISAEKAYHEQLSV	265	280	no	no	2;3	1.612e-120	241	R	I	H	E	K	A	2	0	0	0	0	0	1	0	1	2	1	1	1	1	1	3	0	0	1	1	0	0	507490000	14452000	22030000	16936000	173770000	67069000
A5BZF5	tr|F6HBQ3|F6HBQ3_VITVI	AVFVDLEPTVIDEVR	15	50	208.15	1700.9	GAGKHVPRAVFVDLEP	PTVIDEVRTGAYRQLF	65	79	no	no	2;3	5.4522e-138		R	A	V	V	R	T	1	1	0	2	0	0	2	0	0	1	1	0	0	1	1	0	1	0	0	4	0	0	1376800000	93705000	32401000	38328000	276710000	313750000
A5BZF5	tr|F6HBQ3|F6HBQ3_VITVI	AYHEQLSVAEITNSAFEPSSMMAK	24	1	41.51	2640.22	APVISAEKAYHEQLSV	EPSSMMAKCDPRHGKY	281	304	no	no	3	9.3353e-08		K	A	Y	A	K	C	4	0	1	0	0	1	3	0	1	1	1	1	2	1	1	4	1	0	1	1	0	0	0	0	0	0	0	0
A5BZF5	tr|F6HBQ3|F6HBQ3_VITVI	FDGALNVDVTEFQTNLVPYPR	21	44	210.12	2394.19	SSLTASLRFDGALNVD	TNLVPYPRIHFMLSSY	244	264	no	no	2;3	4.1653e-196		R	F	D	P	R	I	1	1	2	2	0	1	1	1	0	0	2	0	0	2	2	0	2	0	1	3	0	0	779460000	36853000	11363000	17601000	199930000	231690000
A5BZF5	tr|F6HBQ3|F6HBQ3_VITVI	LVSQVISSLTASLR	14	46	204.17	1472.86	PTYTNLNRLVSQVISS	SSLTASLRFDGALNVD	230	243	no	no	2;3	4.0649e-106		R	L	V	L	R	F	1	1	0	0	0	1	0	0	0	1	3	0	0	0	0	4	1	0	0	2	0	0	1900200000	38205000	11379000	6228300	847220000	195990000
A5BZU9	tr|A5BZU9|A5BZU9_VITVI	GLFSLILGEENATDDTQR	18	17	117.18	1977.96	FLNLFGLRGLFSLILG	NATDDTQRMMQMSGFG	182	199	yes	yes	2;3	3.1563e-23		R	G	L	Q	R	M	1	1	1	2	0	1	2	2	0	1	3	0	0	1	0	1	2	0	0	0	0	0	187340000	2008900	0	0	12309000	11330000
A5BZU9	tr|A5BZU9|A5BZU9_VITVI	IPFPLTQR	8	2	63.419	970.56	FSGFVAAKIPFPLTQR	IPFPLTQRFRSMLQNG	141	148	yes	yes	2	0.024116		K	I	P	Q	R	F	0	1	0	0	0	1	0	0	0	1	1	0	0	1	2	0	1	0	0	0	0	0	117940000	1671600	1390200	0	7446100	5001100
A5C0I8	tr|A5C0I8|A5C0I8_VITVI	DHDKPIQEVIAEMTGGGVDR	20	16	83.871	2166.04	VTEFLNPKDHDKPIQE	MTGGGVDRSVECTGNV	249	268	yes	yes	3;4	1.1038e-11	243	K	D	H	D	R	S	1	1	0	3	0	1	2	3	1	2	0	1	1	0	1	0	1	0	0	2	0	1	141070000	0	0	0	29380000	6066700
A5C0I8	tr|A5C0I8|A5C0I8_VITVI	FGVTEFLNPK	10	18	148.73	1150.6	KRFNDAKKFGVTEFLN	VTEFLNPKDHDKPIQE	239	248	yes	yes	2	8.9056e-15		K	F	G	P	K	D	0	0	1	0	0	0	1	1	0	0	1	1	0	2	1	0	1	0	0	1	0	0	184150000	1336800	0	0	33908000	9402100
A5C0I8	tr|A5C0I8|A5C0I8_VITVI	GSSIAIFGLGAVGLAAAEGAR	21	54	134.87	1887.02	LNVAKPSKGSSIAIFG	LAAAEGARIAGAARII	196	216	yes	yes	2;3	5.5756e-66		K	G	S	A	R	I	6	1	0	0	0	0	1	5	0	2	2	0	0	1	0	2	0	0	0	1	0	0	832790000	1365800	3851600	4044900	67871000	56263000
A5C0I8	tr|A5C0I8|A5C0I8_VITVI	KFGVTEFLNPK	11	10	107.17	1278.7	PKRFNDAKKFGVTEFL	VTEFLNPKDHDKPIQE	238	248	yes	yes	2;3	6.4316e-05		K	K	F	P	K	D	0	0	1	0	0	0	1	1	0	0	1	2	0	2	1	0	1	0	0	1	0	1	63506000	0	0	0	15392000	8417900
A5C0I8	tr|A5C0I8|A5C0I8_VITVI	SSTAGQVIR	9	10	119.86	917.493	________________	STAGQVIRCKAAVAWE	2	10	yes	yes	2	2.9893e-06		M	S	S	I	R	C	1	1	0	0	0	1	0	1	0	1	0	0	0	0	0	2	1	0	0	1	0	0	132030000	0	0	0	0	0
A5C0R5	tr|A5C0R5|A5C0R5_VITVI	ALNLEAFFK	9	10	93.649	1051.57	HLNIFHRKALNLEAFF	LNLEAFFKYLFGDINP	83	91	yes	yes	2	0.0027436		K	A	L	F	K	Y	2	0	1	0	0	0	1	0	0	0	2	1	0	2	0	0	0	0	0	0	0	0	33113000	0	0	0	7868200	1413400
A5C0R5	tr|A5C0R5|A5C0R5_VITVI	ATVEDAQAILDSLHEFK	17	20	137.73	1885.94	IEVQQEEKATVEDAQA	LDSLHEFKHLNIFHRK	58	74	yes	yes	2;3	3.7937e-47		K	A	T	F	K	H	3	0	0	2	0	1	2	0	1	1	2	1	0	1	0	1	1	0	0	1	0	0	280820000	3063500	1627900	1915800	36710000	29183000
A5C0R5	tr|A5C0R5|A5C0R5_VITVI	AVPLFSR	7	7	97.068	788.454	SELRRGIRAVPLFSRK	RAVPLFSRKGDKYPSV	570	576	yes	yes	2	0.015934		R	A	V	S	R	K	1	1	0	0	0	0	0	0	0	0	1	0	0	1	1	1	0	0	0	1	0	0	202540000	2072300	2150400	1539800	25922000	22685000
A5C0R5	tr|A5C0R5|A5C0R5_VITVI	FLIEVQQEEK	10	12	119.53	1261.66	MSIDHLQRFLIEVQQE	IEVQQEEKATVEDAQA	48	57	yes	yes	2	7.7323e-07		R	F	L	E	K	A	0	0	0	0	0	2	3	0	0	1	1	1	0	1	0	0	0	0	0	1	0	0	153230000	4186500	4864200	2315400	18950000	12018000
A5C0R5	tr|A5C0R5|A5C0R5_VITVI	GGLTEWLR	8	1	73.665	930.492	AIHAGKVKGGLTEWLR	GGLTEWLRVDPDKVRR	341	348	yes	yes	2	0.010033		K	G	G	L	R	V	0	1	0	0	0	0	1	2	0	0	2	0	0	0	0	0	1	1	0	0	0	0	69792000	0	1878000	0	9668300	4631700
A5C0R5	tr|A5C0R5|A5C0R5_VITVI	HTHFDAYSPPDFYAR	15	36	98.676	1822.81	EGWYFDFRHTHFDAYS	SPPDFYARVGIAGVPA	482	496	yes	yes	2;3;4	2.0431e-08		R	H	T	A	R	V	2	1	0	2	0	0	0	0	2	0	0	0	0	2	2	1	1	0	2	0	0	0	364110000	4155300	3258100	2925800	34571000	32920000
A5C0R5	tr|A5C0R5|A5C0R5_VITVI	LTVSEAPQEIK	11	14	99.589	1213.66	FCFRRRFRLTVSEAPQ	SEAPQEIKELFDRYSE	18	28	yes	yes	2	0.00016718		R	L	T	I	K	E	1	0	0	0	0	1	2	0	0	1	1	1	0	0	1	1	1	0	0	1	0	0	358930000	10839000	10846000	5700200	48588000	35466000
A5C0R5	tr|A5C0R5|A5C0R5_VITVI	RLSLSEQELEK	11	3	64.827	1330.71	RVDPDKVRRLSLSEQE	LSEQELEKAVLTHGKE	356	366	yes	yes	2	0.0075627		R	R	L	E	K	A	0	1	0	0	0	1	3	0	0	0	3	1	0	0	0	2	0	0	0	0	0	1	5168500	0	0	0	0	0
A5C0R5	tr|A5C0R5|A5C0R5_VITVI	VGIAGVPADTIMK	13	1	43.594	1270.7	SPPDFYARVGIAGVPA	VPADTIMKKTKTLEDN	497	509	yes	yes	2	0.027765		R	V	G	M	K	K	2	0	0	1	0	0	0	2	0	2	0	1	1	0	1	0	1	0	0	2	0	0	140530000	3370600	4812800	4388600	30427000	0
A5C0R5	tr|A5C0R5|A5C0R5_VITVI	VIELDIWPNSTK	12	11	67.952	1413.75	HALQRGVRVIELDIWP	DIWPNSTKDNVDVLHG	152	163	yes	no	2	0.0015789		R	V	I	T	K	D	0	0	1	1	0	0	1	0	0	2	1	1	0	0	1	1	1	1	0	1	0	0	48572000	564190	1399300	0	11957000	2445000
A5C0Z3	tr|A5C0Z3|A5C0Z3_VITVI	KIEDAIDQAIQWLDSNQLAEADEFEDK	27	4	36.3	3133.47	KLTPADKKKIEDAIDQ	EADEFEDKMKELESIC	575	601	yes	yes	3	0.00026926		K	K	I	D	K	M	4	0	1	5	0	3	4	0	0	3	2	2	0	1	0	1	0	1	0	0	0	1	49773000	0	0	0	11925000	8757800
A5C0Z3	tr|F6GV26|F6GV26_VITVI	FSDSSVQSDIK	11	17	153.74	1211.57	AKRLIGRRFSDSSVQS	SSVQSDIKLWPFKVIA	81	91	no	no	2	1.2628e-26		R	F	S	I	K	L	0	0	0	2	0	1	0	0	0	1	0	1	0	1	0	4	0	0	0	1	0	0	508600000	0	0	0	81561000	95974000
A5C0Z3	tr|F6GV26|F6GV26_VITVI	FSDSSVQSDIKLWPFK	16	3	102.65	1882.95	AKRLIGRRFSDSSVQS	DIKLWPFKVIAGPGDK	81	96	no	no	3	1.8182e-11		R	F	S	F	K	V	0	0	0	2	0	1	0	0	0	1	1	2	0	2	1	4	0	1	0	1	0	1	20183000	0	0	0	9366000	0
A5C0Z3	tr|F6GV26|F6GV26_VITVI	RFSDSSVQSDIK	12	2	51.939	1367.67	DAKRLIGRRFSDSSVQ	SSVQSDIKLWPFKVIA	80	91	no	no	2;3	0.0049824		R	R	F	I	K	L	0	1	0	2	0	1	0	0	0	1	0	1	0	1	0	4	0	0	0	1	0	1	39511000	0	0	0	12569000	12189000
A5C0Z3	tr|F6HNX5|F6HNX5_VITVI	IINEPTAAAIAYGLDK	16	18	104.2	1658.89	IAGLNVMRIINEPTAA	AIAYGLDKKATSVGEK	176	191	no	no	2;3	3.7277e-19		R	I	I	D	K	K	4	0	1	1	0	0	1	1	0	3	1	1	0	0	1	0	1	0	1	0	0	0	143310000	0	0	4286300	14054000	5662900
A5C0Z3	tr|F6HNX5|F6HNX5_VITVI	IINEPTAAAIAYGLDKK	17	20	103.88	1786.98	IAGLNVMRIINEPTAA	IAYGLDKKATSVGEKN	176	192	no	no	2;3	5.119e-15		R	I	I	K	K	A	4	0	1	1	0	0	1	1	0	3	1	2	0	0	1	0	1	0	1	0	0	1	216890000	15293000	13526000	8690500	34118000	18823000
A5C0Z3	tr|F6HNX5|F6HNX5_VITVI	EIAEAYLGSTVK	12	19	134.56	1279.67	SMVLIKMREIAEAYLG	AYLGSTVKNAVVTVPA	133	144	no	no	2	7.7968e-15		R	E	I	V	K	N	2	0	0	0	0	0	2	1	0	1	1	1	0	0	0	1	1	0	1	1	0	0	251460000	0	15014000	15299000	26383000	14262000
A5C0Z3	tr|F6HNX5|F6HNX5_VITVI	QFAAEEISSMVLIK	14	1	102.5	1564.82	VTYKGEDKQFAAEEIS	ISSMVLIKMREIAEAY	117	130	no	no	2	2.2128e-08		K	Q	F	I	K	M	2	0	0	0	0	1	2	0	0	2	1	1	1	1	0	2	0	0	0	1	0	0	74838000	5154800	1955200	2459200	15599000	10215000
A5C0Z3	tr|F6HNX5|F6HNX5_VITVI	TLSSTAQTTIEIDSLYEGIDFYSTITR	27	6	51.473	3024.48	TSCERAKRTLSSTAQT	DFYSTITRARFEELNM	279	305	no	no	3	1.5328e-07		R	T	L	T	R	A	1	1	0	2	0	1	2	1	0	4	2	0	0	1	0	4	6	0	2	0	0	0	41612000	0	0	0	15192000	12734000
A5C0Z3	tr|F6HNX5|F6HNX5_VITVI	EQVFSTYSDNQPGVLIQVYEGER	23	56	131.77	2657.26	NTTIPTKKEQVFSTYS	IQVYEGERTRTRDNNL	431	453	no	no	2;3	9.7393e-64		K	E	Q	E	R	T	0	1	1	1	0	3	3	2	0	1	1	0	0	1	1	2	1	0	2	3	0	0	734830000	7923600	5880900	4835300	108760000	82174000
A5C0Z3	tr|F6HNX5|F6HNX5_VITVI	EQVFSTYSDNQPGVLIQVYEGERTR	25	7	70.345	2914.41	NTTIPTKKEQVFSTYS	VYEGERTRTRDNNLLG	431	455	no	no	3	5.6369e-14		K	E	Q	T	R	T	0	2	1	1	0	3	3	2	0	1	1	0	0	1	1	2	2	0	2	3	0	1	15550000	0	0	0	0	0
A5C0Z3	tr|F6HNX5|F6HNX5_VITVI	KEQVFSTYSDNQPGVLIQVYEGER	24	7	88.239	2785.36	RNTTIPTKKEQVFSTY	IQVYEGERTRTRDNNL	430	453	no	no	3	3.2165e-24		K	K	E	E	R	T	0	1	1	1	0	3	3	2	0	1	1	1	0	1	1	2	1	0	2	3	0	1	19493000	0	0	0	0	0
A5C0Z3	tr|F6HNX5|F6HNX5_VITVI	ARFEELNMDLFR	12	32	134.18	1539.75	DFYSTITRARFEELNM	ELNMDLFRKCMEPVEK	306	317	no	no	2;3	1.4055e-14	245	R	A	R	F	R	K	1	2	1	1	0	0	2	0	0	0	2	0	1	2	0	0	0	0	0	0	0	1	546490000	2510300	6024600	2774400	95792000	48742000
A5C0Z3	tr|F6HNX5|F6HNX5_VITVI	DAGVIAGLNVMR	12	11	98.156	1214.64	DSQRQATKDAGVIAGL	IAGLNVMRIINEPTAA	164	175	no	no	2	4.2696e-05	246	K	D	A	M	R	I	2	1	1	1	0	0	0	2	0	1	1	0	1	0	0	0	0	0	0	2	0	0	194400000	17716000	15664000	7910500	40317000	29082000
A5C0Z3	tr|F6HNX5|F6HNX5_VITVI	FEELNMDLFR	10	47	131.82	1312.61	YSTITRARFEELNMDL	ELNMDLFRKCMEPVEK	308	317	no	no	2	5.2058e-08	245	R	F	E	F	R	K	0	1	1	1	0	0	2	0	0	0	2	0	1	2	0	0	0	0	0	0	0	0	812860000	8675000	10572000	6646900	96873000	72674000
A5C0Z3	tr|F6HNX5|F6HNX5_VITVI	MVNHFVQEFK	10	24	148.19	1277.62	GGEDFDNRMVNHFVQE	NHFVQEFKRKHKKDIT	243	252	no	no	2;3	1.0029e-18	247	R	M	V	F	K	R	0	0	1	0	0	1	1	0	1	0	0	1	1	2	0	0	0	0	0	2	0	0	435440000	2706000	4350500	5821800	48237000	49607000
A5C0Z3	tr|F6HNX5|F6HNX5_VITVI	NALENYAYNMR	11	83	218.15	1357.61	HKKKVEAKNALENYAY	ENYAYNMRNTVKDEKI	546	556	no	no	2;3	5.0874e-114	248	K	N	A	M	R	N	2	1	3	0	0	0	1	0	0	0	1	0	1	0	0	0	0	0	2	0	0	0	4100400000	30604000	32470000	21366000	438840000	242630000
A5C0Z3	tr|F6HNX5|F6HNX5_VITVI	NAVVTVPAYFNDSQR	15	47	148.57	1679.83	AYLGSTVKNAVVTVPA	AYFNDSQRQATKDAGV	145	159	no	no	2	2.8691e-47		K	N	A	Q	R	Q	2	1	2	1	0	1	0	0	0	0	0	0	0	1	1	1	1	0	1	3	0	0	548890000	22013000	28724000	18472000	116620000	59908000
A5C0Z3	tr|F6HNX5|F6HNX5_VITVI	NQVAMNPINTVFDAK	15	21	143.93	1660.82	RLIGDAAKNQVAMNPI	INTVFDAKRLIGRRFS	60	74	no	no	2	6.5383e-47	249	K	N	Q	A	K	R	2	0	3	1	0	1	0	0	0	1	0	1	1	1	1	0	1	0	0	2	0	0	183550000	3447100	6638000	6258700	53152000	20405000
A5C0Z3	tr|F6HNX5|F6HNX5_VITVI	VEIIANDQGNR	11	16	143.97	1227.62	VGVWQHDRVEIIANDQ	IANDQGNRTTPSYVAF	29	39	no	no	2	3.8944e-20		R	V	E	N	R	T	1	1	2	1	0	1	1	1	0	2	0	0	0	0	0	0	0	0	0	1	0	0	928000000	31829000	26764000	36348000	203310000	179820000
A5C0Z3	tr|F6HNX5|F6HNX5_VITVI	ATAGDTHLGGEDFDNR	16	32	211.9	1674.72	EEGIFEVKATAGDTHL	GGEDFDNRMVNHFVQE	227	242	no	no	2;3	5.9311e-139		K	A	T	N	R	M	2	1	1	3	0	0	1	3	1	0	1	0	0	1	0	0	2	0	0	0	0	0	595690000	22836000	15989000	10817000	74511000	87143000
A5C0Z3	tr|F6HNX5|F6HNX5_VITVI	TTPSYVAFTDTER	13	35	135.04	1486.69	IANDQGNRTTPSYVAF	VAFTDTERLIGDAAKN	40	52	no	no	2	2.3521e-22		R	T	T	E	R	L	1	1	0	1	0	0	1	0	0	0	0	0	0	1	1	1	4	0	1	1	0	0	1028900000	46626000	53469000	36639000	186200000	150870000
A5C0Z3	tr|F6HNX5|F6HNX5_VITVI	VQQLLQDFFNGK	12	11	151.79	1435.75	GGSTRIPKVQQLLQDF	LQDFFNGKELCKSINP	352	363	no	no	2	1.6538e-22		K	V	Q	G	K	E	0	0	1	1	0	3	0	1	0	0	2	1	0	2	0	0	0	0	0	1	0	0	93545000	159110	1206800	0	16395000	11613000
A5C166	tr|A5C166|A5C166_VITVI	GTPFAEDQGIYNR	13	20	207.47	1466.68	YHFFHWKKGTPFAEDQ	EDQGIYNRLTWWEQID	73	85	yes	yes	2	1.1539e-108		K	G	T	N	R	L	1	1	1	1	0	1	1	2	0	1	0	0	0	1	1	0	1	0	1	0	0	0	287300000	1937500	2319000	1960200	18196000	16839000
A5C166	tr|A5C166|A5C166_VITVI	IFGINADH	8	3	126.28	885.434	FPNMHKVRIFGINADH	IFGINADH________	150	157	yes	no	2	0.0014199		R	I	F	D	H	-	1	0	1	1	0	0	0	1	1	2	0	0	0	1	0	0	0	0	0	0	0	0	107270000	2015800	3736500	2312400	17819000	12305000
A5C1J0	tr|A5C1J0|A5C1J0_VITVI	AYGGVLSGGAVR	12	20	117.25	1105.59	RNRRTVNRAYGGVLSG	VLSGGAVRERIIRAFL	77	88	yes	no	2	3.3097e-11		R	A	Y	V	R	E	2	1	0	0	0	0	0	4	0	0	1	0	0	0	0	1	0	0	1	2	0	0	2872700000	19141000	11007000	9307300	950640000	105960000
A5C1J0	tr|A5C1J0|A5C1J0_VITVI	IQGIPHLRPAEYK	13	2	36.631	1520.85	KCPVTGKRIQGIPHLR	HLRPAEYKRSRLPRNR	51	63	yes	no	4	0.023429		R	I	Q	Y	K	R	1	1	0	0	0	1	1	1	1	2	1	1	0	0	2	0	0	0	1	0	0	1	145000000	0	0	0	15429000	0
A5C1N0	tr|A5C1N0|A5C1N0_VITVI	LDLAGPLLGGLFR	13	5	79.492	1340.78	RDHYGNKRLDLAGPLL	PLLGGLFRMLFRKLTR	399	411	yes	yes	2	0.0015905		R	L	D	F	R	M	1	1	0	1	0	0	0	3	0	0	5	0	0	1	1	0	0	0	0	0	0	0	21636000	0	0	0	0	0
A5C234	tr|A5C234|A5C234_VITVI	ASPDNAPLIDVTQFGYFK	18	3	77.221	1981.98	VPQDVKDKASPDNAPL	VTQFGYFKVLGKGALP	90	107	yes	yes	2	1.6571e-06		K	A	S	F	K	V	2	0	1	2	0	1	0	1	0	1	1	1	0	2	2	1	1	0	1	1	0	0	20820000	0	1495100	832270	6282400	0
A5C347	tr|A5C347|A5C347_VITVI	AEDLGLLSLLEK	12	13	166.71	1299.73	EKLGVFSKAEDLGLLS	GLLSLLEKAASFSPSA	116	127	yes	yes	2	4.6599e-35		K	A	E	E	K	A	1	0	0	1	0	0	2	1	0	0	5	1	0	0	0	1	0	0	0	0	0	0	206620000	4923700	3647300	1543900	47335000	33233000
A5C347	tr|A5C347|A5C347_VITVI	AEELGFTLSSIEK	13	7	76.759	1422.72	EKSGLLSKAEELGFTL	FTLSSIEKLGVFSKAE	97	109	yes	yes	2	0.00082662		K	A	E	E	K	L	1	0	0	0	0	0	3	1	0	1	2	1	0	1	0	2	1	0	0	0	0	0	24504000	534650	0	3725300	7449600	6204500
A5C3B4	tr|A5C3B4|A5C3B4_VITVI	ATIEAELSK	9	10	76.228	960.513	VAIIKDYRATIEAELS	TIEAELSKICDGILSL	93	101	yes	yes	2	0.0055706		R	A	T	S	K	I	2	0	0	0	0	0	2	0	0	1	1	1	0	0	0	1	1	0	0	0	0	0	365480000	0	0	0	71116000	52483000
A5C3B4	tr|A5C3B4|A5C3B4_VITVI	EAAESTLLAYK	11	16	128.01	1194.61	FKTGPGRKEAAESTLL	ESTLLAYKSAQDIALA	149	159	yes	yes	2	4.157e-12		K	E	A	Y	K	S	3	0	0	0	0	0	2	0	0	0	2	1	0	0	0	1	1	0	1	0	0	0	232900000	5419000	8787100	8897300	45506000	55240000
A5C3B4	tr|A5C3B4|A5C3B4_VITVI	GNEDHVAIIK	10	3	181.68	1094.57	IEQKEESRGNEDHVAI	EDHVAIIKDYRATIEA	80	89	yes	yes	2;3	8.9956e-44		R	G	N	I	K	D	1	0	1	1	0	0	1	1	1	2	0	1	0	0	0	0	0	0	0	1	0	0	37557000	21009000	15384000	0	0	592110
A5C3B4	tr|A5C3B4|A5C3B4_VITVI	GNEDHVAIIKDYR	13	1	34.382	1528.76	IEQKEESRGNEDHVAI	VAIIKDYRATIEAELS	80	92	yes	yes	3	0.05054		R	G	N	Y	R	A	1	1	1	2	0	0	1	1	1	2	0	1	0	0	0	0	0	0	1	1	0	1	87702000	948210	1431700	2213000	8697400	8226600
A5C3B4	tr|A5C3B4|A5C3B4_VITVI	KEAAESTLLAYK	12	1	55.98	1322.71	EFKTGPGRKEAAESTL	ESTLLAYKSAQDIALA	148	159	yes	yes	2;3	0.017351		R	K	E	Y	K	S	3	0	0	0	0	0	2	0	0	0	2	2	0	0	0	1	1	0	1	0	0	1	32152000	1470900	0	0	13102000	12350000
A5C3B4	tr|A5C3B4|A5C3B4_VITVI	QAFDEAISELDTLGEESYK	19	4	74.324	2143.98	DRACNLAKQAFDEAIS	TLGEESYKDSTLIMQL	203	221	yes	yes	2	1.6728e-08		K	Q	A	Y	K	D	2	0	0	2	0	1	4	1	0	1	2	1	0	1	0	2	1	0	1	0	0	0	58147000	0	0	0	28322000	25066000
A5C3B4	tr|A5C3B4|A5C3B4_VITVI	SAQDIALAELAPTHPIR	17	25	189.41	1801.97	ESTLLAYKSAQDIALA	LAPTHPIRLGLALNFS	160	176	yes	yes	2;3	1.1006e-120		K	S	A	I	R	L	4	1	0	1	0	1	1	0	1	2	2	0	0	0	2	1	1	0	0	0	0	0	387550000	5989500	6620100	3433100	59312000	47068000
A5C3B4	tr|A5C3B4|A5C3B4_VITVI	TVEVEELTVEER	12	26	138.89	1431.71	EFMEKVAKTVEVEELT	EELTVEERNLLSVAYK	37	48	yes	yes	2	1.7922e-16		K	T	V	E	R	N	0	1	0	0	0	0	5	0	0	0	1	0	0	0	0	0	2	0	0	3	0	0	303000000	5413000	5447600	5277800	49404000	46860000
A5C3B4	tr|A5C3B4|A5C3B4_VITVI	YEEMVEFMEK	10	43	120.06	1333.56	KLAEQAERYEEMVEFM	EMVEFMEKVAKTVEVE	24	33	no	no	2	7.2211e-07	250;251	R	Y	E	E	K	V	0	0	0	0	0	0	4	0	0	0	0	1	2	1	0	0	0	0	1	1	0	0	297550000	10735000	5507300	8071700	83982000	53338000
A5C3B4	tr|A5C3B4|A5C3B4_VITVI	IISSIEQKEESR	12	27	265.22	1417.74	GARRASWRIISSIEQK	IEQKEESRGNEDHVAI	68	79	no	no	2;3	3.4892e-233		R	I	I	S	R	G	0	1	0	0	0	1	3	0	0	3	0	1	0	0	0	3	0	0	0	0	0	1	1004400000	10304000	22394000	15274000	73827000	82180000
A5C3B4	tr|A5C3B4|A5C3B4_VITVI	NLLSVAYKNVIGAR	14	4	75.764	1516.87	EELTVEERNLLSVAYK	YKNVIGARRASWRIIS	49	62	no	no	3	0.00022199		R	N	L	A	R	R	2	1	2	0	0	0	0	1	0	1	2	1	0	0	0	1	0	0	1	2	0	1	0	0	0	0	0	0
A5C3B4	tr|A5C3B4|A5C3B4_VITVI	NLLSVAYK	8	26	79.474	906.517	EELTVEERNLLSVAYK	NLLSVAYKNVIGARRA	49	56	no	no	2	0.006772		R	N	L	Y	K	N	1	0	1	0	0	0	0	0	0	0	2	1	0	0	0	1	0	0	1	1	0	0	1184300000	21496000	31633000	26137000	197100000	90023000
A5C3B4	tr|A5C3B4|A5C3B4_VITVI	DSTLIMQLLR	10	44	137.85	1188.65	TLGEESYKDSTLIMQL	TLIMQLLRDNLTLWTS	222	231	no	no	2	8.2316e-11	116	K	D	S	L	R	D	0	1	0	1	0	1	0	0	0	1	3	0	1	0	0	1	1	0	0	0	0	0	857060000	33549000	31583000	19219000	182260000	109660000
A5C3B4	tr|A5C3B4|A5C3B4_VITVI	LAEQAER	7	1	81.297	815.414	EENVYMAKLAEQAERY	KLAEQAERYEEMVEFM	17	23	no	no	2	0.023129		K	L	A	E	R	Y	2	1	0	0	0	1	2	0	0	0	1	0	0	0	0	0	0	0	0	0	0	0	2819100	0	0	0	527660	635970
A5C3G7	tr|A5C3G7|A5C3G7_VITVI	AIYTVGFWIR	10	1	54.539	1224.67	________________	YTVGFWIRETGQAIDR	7	16	yes	yes	2	0.018472		K	A	I	I	R	E	1	1	0	0	0	0	0	1	0	2	0	0	0	1	0	0	1	1	1	1	0	0	0	0	0	0	0	0
A5C3G7	tr|A5C3G7|A5C3G7_VITVI	APIVDKDAFVAPSASIIGDVQVGR	24	15	123.64	2424.3	TLMNLFDKAPIVDKDA	IGDVQVGRGSSIWYGC	52	75	yes	yes	3	4.1729e-52		K	A	P	G	R	G	4	1	0	3	0	1	0	2	0	3	0	1	0	1	2	2	0	0	0	4	0	1	145320000	1916800	1863000	1846200	27607000	22020000
A5C3G7	tr|A5C3G7|A5C3G7_VITVI	DAFVAPSASIIGDVQVGR	18	19	97.095	1800.94	DKAPIVDKDAFVAPSA	IGDVQVGRGSSIWYGC	58	75	yes	yes	2	1.2823e-10		K	D	A	G	R	G	3	1	0	2	0	1	0	2	0	2	0	0	0	1	1	2	0	0	0	3	0	0	176800000	1647300	2437700	1426100	19093000	32643000
A5C3G7	tr|A5C3G7|A5C3G7_VITVI	GDVNSISVGSGTNIQDNSLVHVAK	24	19	173.55	2410.21	IWYGCVLRGDVNSISV	NSLVHVAKSNLSGKVL	87	110	yes	yes	3	1.4766e-144		R	G	D	A	K	S	1	0	3	2	0	1	0	3	1	2	1	1	0	0	0	4	1	0	0	4	0	0	259820000	3610200	3725000	4354000	46814000	39595000
A5C3G7	tr|A5C3G7|A5C3G7_VITVI	HAMVAAGALVR	11	4	90.15	1094.6	LDGSIVEKHAMVAAGA	VAAGALVRQNTRIPCG	160	170	yes	yes	2	9.1689e-05	252	K	H	A	V	R	Q	4	1	0	0	0	0	0	1	1	0	1	0	1	0	0	0	0	0	0	2	0	0	50678000	5800200	3221500	0	9350900	10792000
A5C3G7	tr|A5C3G7|A5C3G7_VITVI	LQGNYYFLEQISR	13	33	178.67	1629.82	AIDRLGCRLQGNYYFL	YFLEQISRHRTLMNLF	29	41	yes	yes	2	5.7519e-64		R	L	Q	S	R	H	0	1	1	0	0	2	1	1	0	1	2	0	0	1	0	1	0	0	2	0	0	0	649410000	4994100	6271600	5026100	142030000	44647000
A5C3G7	tr|A5C3G7|A5C3G7_VITVI	RDEDYDSMLGVVR	13	1	37.366	1553.71	VLRKKFARRDEDYDSM	DSMLGVVRETPPELIL	238	250	yes	yes	2;3	0.01301		R	R	D	V	R	E	0	2	0	3	0	0	1	1	0	0	1	0	1	0	0	1	0	0	1	2	0	1	15010000	0	0	0	0	6994400
A5C3G7	tr|A5C3G7|A5C3G7_VITVI	TLMNLFDK	8	15	74.376	980.5	LEQISRHRTLMNLFDK	TLMNLFDKAPIVDKDA	44	51	yes	yes	2	0.0098045	253	R	T	L	D	K	A	0	0	1	1	0	0	0	0	0	0	2	1	1	1	0	0	1	0	0	0	0	0	228590000	1429300	2928400	1694300	34155000	12506000
A5C3I9	tr|A5C3I9|A5C3I9_VITVI	LPTDDNLLTQIK	12	3	90.861	1369.75	GGTKDDLRLPTDDNLL	DNLLTQIKDGFAEGKD	117	128	yes	no	2	0.00010983		R	L	P	I	K	D	0	0	1	2	0	1	0	0	0	1	3	1	0	0	1	0	2	0	0	0	0	0	32099000	1487400	2407300	2654800	10699000	0
A5C3I9	tr|A5C3I9|A5C3I9_VITVI	TYPQQAGAIR	10	4	93.649	1103.57	KADAGASKTYPQQAGA	PQQAGAIRKNGYIVIK	19	28	yes	no	2	0.00077364		K	T	Y	I	R	K	2	1	0	0	0	2	0	1	0	1	0	0	0	0	1	0	1	0	1	0	0	0	21620000	2421300	6051500	1396000	0	0
A5C3J4	tr|A5C3J4|A5C3J4_VITVI	AAIYSLYIINK	11	2	80.758	1267.72	________________	YSLYIINKSGGLIFYK	2	12	yes	yes	2	0.00020526		M	A	A	N	K	S	2	0	1	0	0	0	0	0	0	3	1	1	0	0	0	1	0	0	2	0	0	0	20622000	0	0	849790	6937000	3581300
A5C3N2	tr|A5C3N2|A5C3N2_VITVI	IGAGLIAGGIGAVVGNPADVAMVR	24	3	33.37	2177.2	GNMPLVSKIGAGLIAG	PADVAMVRMQADGRLP	130	153	yes	yes	2;3	0.0048869		K	I	G	V	R	M	5	1	1	1	0	0	0	6	0	3	1	0	1	0	1	0	0	0	0	4	0	0	13807000	0	0	0	0	0
A5C3N2	tr|A5C3N2|A5C3N2_VITVI	IVQQEGVVALFSGVSATVLR	20	22	110.6	2072.16	GPITVGVRIVQQEGVV	GVSATVLRQTLYSTTR	78	97	yes	yes	3	5.2216e-27		R	I	V	L	R	Q	2	1	0	0	0	2	1	2	0	1	2	0	0	1	0	2	1	0	0	5	0	0	98505000	2283500	0	965490	6860000	4196900
A5C3N2	tr|A5C3N2|A5C3N2_VITVI	MGLYDILK	8	1	72.23	951.51	QTLYSTTRMGLYDILK	MGLYDILKKKWTDPAT	106	113	yes	yes	2	0.035346	254	R	M	G	L	K	K	0	0	0	1	0	0	0	1	0	1	2	1	1	0	0	0	0	0	1	0	0	0	26222000	0	0	0	0	0
A5C3N2	tr|A5C3N2|A5C3N2_VITVI	QEGVTSLWR	9	2	53.124	1074.55	DAITRMSKQEGVTSLW	EGVTSLWRGSSLTVNR	181	189	yes	yes	2	0.030067		K	Q	E	W	R	G	0	1	0	0	0	1	1	1	0	0	1	0	0	0	0	1	1	1	0	1	0	0	20445000	0	0	0	0	0
A5C3N2	tr|A5C3N2|A5C3N2_VITVI	SVLDAITR	8	5	93.267	873.492	LAQRRNYKSVLDAITR	SVLDAITRMSKQEGVT	170	177	yes	yes	2	0.0067902		K	S	V	T	R	M	1	1	0	1	0	0	0	0	0	1	1	0	0	0	0	1	1	0	0	1	0	0	76456000	0	0	0	0	0
A5C3N2	tr|A5C3N2|A5C3N2_VITVI	VGPITVGVR	9	9	107.1	896.544	VHVTRPPRVGPITVGV	GPITVGVRIVQQEGVV	69	77	yes	yes	2	0.0006019		R	V	G	V	R	I	0	1	0	0	0	0	0	2	0	1	0	0	0	0	1	0	1	0	0	3	0	0	219960000	5158600	5876100	3583200	16925000	20826000
A5C3N2	tr|A5C3N2|A5C3N2_VITVI	AMLVTASQLASYDQIK	16	5	77.324	1737.9	GSSLTVNRAMLVTASQ	LASYDQIKETILQKGL	198	213	yes	no	2	0.00014157		R	A	M	I	K	E	3	0	0	1	0	2	0	0	0	1	2	1	1	0	0	2	1	0	1	1	0	0	22828000	0	0	0	0	0
A5C3V1	tr|A5C3V1|A5C3V1_VITVI	VFMYPSNI	8	5	97.068	969.463	KSMGARVRVFMYPSNI	VFMYPSNI________	105	112	yes	yes	1;2	0.0077291	255	R	V	F	N	I	-	0	0	1	0	0	0	0	0	0	1	0	0	1	1	1	1	0	0	1	1	0	0	48713000	0	1459500	1203200	9139000	9548700
A5C3V1	tr|A5C3V1|A5C3V1_VITVI	SNQYPNTSLIQIEGVNTK	18	24	106.75	2005.01	ILGYKRSKSNQYPNTS	QIEGVNTKEEVAWYCG	26	43	yes	no	2	3.2201e-15		K	S	N	T	K	E	0	0	3	0	0	2	1	1	0	2	1	1	0	0	1	2	2	0	1	1	0	0	158400000	1647300	5353900	3729500	23031000	19990000
A5C4C2	tr|A5C4C2|A5C4C2_VITVI	VETGIIKPGMVVTFGPSGLTTEVK	24	11	134.68	2459.33	IGTVPVGRVETGIIKP	SGLTTEVKSVEMHHES	255	278	yes	yes	3	2.6522e-65	256	R	V	E	V	K	S	0	0	0	0	0	0	2	4	0	2	1	2	1	1	2	1	4	0	0	4	0	1	162150000	5091000	3033600	1849400	30104000	33540000
A5C4J2	tr|A5C4J2|A5C4J2_VITVI	ELAPYDPDWYYIR	13	26	111.96	1699.79	IVKTATFKELAPYDPD	DPDWYYIRAASMARKI	45	57	yes	yes	2	1.0185e-08		K	E	L	I	R	A	1	1	0	2	0	0	1	0	0	1	1	0	0	0	2	0	0	1	3	0	0	0	312570000	8429700	7210300	3724100	41520000	36996000
A5C4J2	tr|A5C4J2|A5C4J2_VITVI	GGIGVGAFR	9	30	110.31	832.456	MARKIYLRGGIGVGAF	GIGVGAFRRIYGGSKR	69	77	yes	yes	2	0.00032742		R	G	G	F	R	R	1	1	0	0	0	0	0	4	0	1	0	0	0	1	0	0	0	0	0	1	0	0	1144600000	10591000	15818000	11384000	111430000	104800000
A5C4J2	tr|A5C4J2|A5C4J2_VITVI	GGIGVGAFRR	10	1	54.722	988.557	MARKIYLRGGIGVGAF	IGVGAFRRIYGGSKRN	69	78	yes	yes	2	0.055385		R	G	G	R	R	I	1	2	0	0	0	0	0	4	0	1	0	0	0	1	0	0	0	0	0	1	0	1	48873000	1366700	0	0	2349000	4444000
A5C4J2	tr|A5C4J2|A5C4J2_VITVI	HILQQLQTMNIIELDSK	17	1	43.752	2023.08	KSSGSIARHILQQLQT	NIIELDSKGGRRITSS	103	119	yes	yes	3	0.0052939		R	H	I	S	K	G	0	0	1	1	0	3	1	0	1	3	3	1	1	0	0	1	1	0	0	0	0	0	14361000	0	0	0	0	0
A5C4J2	tr|A5BGC5|A5BGC5_VITVI	IELPHWTDIVK	11	31	122.7	1349.73	AHLKRSGKIELPHWTD	PHWTDIVKTATFKELA	29	39	no	no	2;3	2.9528e-11		K	I	E	V	K	T	0	0	0	1	0	0	1	0	1	2	1	1	0	0	1	0	1	1	0	1	0	0	110470000	417820	0	0	17703000	0
A5C4U4	tr|A5C4U4|A5C4U4_VITVI	ALDQYVR	7	8	80.462	863.45	FRSELFDKALDQYVRG	KALDQYVRGLG_____	160	166	yes	yes	2	0.024995		K	A	L	V	R	G	1	1	0	1	0	1	0	0	0	0	1	0	0	0	0	0	0	0	1	1	0	0	98272000	0	0	0	13919000	15463000
A5C4U4	tr|A5C4U4|A5C4U4_VITVI	IILVTHPGTGDLR	13	8	123.95	1390.79	MESPSGIKIILVTHPG	HPGTGDLRESLKYIYN	114	126	yes	yes	2	6.1898e-25		K	I	I	L	R	E	0	1	0	1	0	0	0	2	1	2	2	0	0	0	1	0	2	0	0	1	0	0	48759000	0	0	0	5120400	6494200
A5C4U4	tr|A5C4U4|A5C4U4_VITVI	NPLYSPGTPFR	11	3	100.93	1247.63	LYVEYVVKNPLYSPGT	YSPGTPFRSELFDKAL	143	153	yes	yes	2	3.3532e-07		K	N	P	F	R	S	0	1	1	0	0	0	0	1	0	0	1	0	0	1	3	1	1	0	1	0	0	0	100920000	1710800	1001500	0	13046000	11686000
A5C4U4	tr|A5C4U4|A5C4U4_VITVI	LSFMESPSGIK	11	6	68.536	1194.6	SFRTNTYKLSFMESPS	MESPSGIKIILVTHPG	103	113	no	no	2	0.0034116		K	L	S	I	K	I	0	0	0	0	0	0	1	1	0	1	1	1	1	1	1	3	0	0	0	0	0	0	48555000	0	0	0	0	0
A5C4U9	tr|A5C4U9|A5C4U9_VITVI	AKPVSSGSPWYGTDR	15	5	58.814	1606.77	TMRKTGGRAKPVSSGS	SPWYGTDRVKYLGPFS	42	56	yes	yes	2;3	0.0010702		R	A	K	D	R	V	1	1	0	1	0	0	0	2	0	0	0	1	0	0	2	3	1	1	1	1	0	1	223420000	0	2999100	1350400	30579000	28448000
A5C4U9	tr|A5C4U9|A5C4U9_VITVI	IGGGPLGEVVDPLYPGGSFDPLGLADDPEAFAELK	35	5	141.98	3511.74	MGAVEGYRIGGGPLGE	PEAFAELKVKEIKNGR	178	212	yes	yes	3	9.6156e-136		R	I	G	L	K	V	3	0	0	4	0	0	3	7	0	1	5	1	0	2	5	1	0	0	1	2	0	0	628600000	19834000	0	0	92063000	0
A5C4U9	tr|A5C4U9|A5C4U9_VITVI	PVSSGSPWYGTDR	13	0	57.095	1407.64	RKTGGRAKPVSSGSPW	SPWYGTDRVKYLGPFS	44	56	yes	yes	2	0.014454		K	P	V	D	R	V	0	1	0	1	0	0	0	2	0	0	0	0	0	0	2	3	1	1	1	1	0	0	50860000	0	0	1174600	8570700	8034300
A5C504	tr|A5C504|A5C504_VITVI	AVSAIVYVVDAADPDNIGISK	21	36	113.51	2116.11	TMWERYCRAVSAIVYV	PDNIGISKSELHDLLS	87	107	yes	yes	2;3	8.4845e-34		R	A	V	S	K	S	4	0	1	3	0	0	0	1	0	3	0	1	0	0	1	2	0	0	1	4	0	0	293990000	3544800	2881900	954090	35962000	57433000
A5C504	tr|A5C504|A5C504_VITVI	HALTEEMGLK	10	3	103.18	1127.56	DKPGALSKHALTEEMG	LTEEMGLKSITDREVC	140	149	yes	yes	2	0.00014416		K	H	A	L	K	S	1	0	0	0	0	0	2	1	1	0	2	1	1	0	0	0	1	0	0	0	0	0	55975000	0	0	0	12617000	10198000
A5C504	tr|A5C504|A5C504_VITVI	SELHDLLSKPSLNGIPLLVLGNK	23	1	24.207	2456.4	PDNIGISKSELHDLLS	PLLVLGNKIDKPGALS	108	130	yes	yes	3	0.016533		K	S	E	N	K	I	0	0	2	1	0	0	1	2	1	1	7	2	0	0	2	3	0	0	0	1	0	1	18866000	0	0	0	0	0
A5C504	tr|A5C504|A5C504_VITVI	TSLVNVVATGGYSEDMIPTVGFNMR	25	1	67.877	2657.28	IGLQNAGKTSLVNVVA	PTVGFNMRKVTKGNVT	33	57	yes	yes	3	1.2182e-30	257	K	T	S	M	R	K	1	1	2	1	0	0	1	3	0	1	1	0	2	1	1	2	3	0	1	4	0	0	0	0	0	0	0	0
A5C5A3	tr|A5C5A3|A5C5A3_VITVI	SGVGVASMGVMRPELVMK	18	145	183.6	1846.95	GAAYGTAKSGVGVASM	MRPELVMKSIVPVVMA	36	53	yes	no	2;3	2.6239e-106	145;146;147	K	S	G	M	K	S	1	1	0	0	0	0	1	3	0	0	1	1	3	0	1	2	0	0	0	4	0	1	2954600000	22824000	19769000	17171000	464950000	446310000
A5C5K3	tr|A5C5K3|A5C5K3_VITVI	DIIMVDHMR	9	26	80.219	1128.54	FVTTTGNKDIIMVDHM	IIMVDHMRKMKNNAIV	329	337	yes	yes	2;3	0.0010196	258;259	K	D	I	M	R	K	0	1	0	2	0	0	0	0	1	2	0	0	2	0	0	0	0	0	0	1	0	0	205880000	1031000	1724000	1381600	39927000	40088000
A5C5K3	tr|A5C5K3|A5C5K3_VITVI	DQADYISVPIEGPYKPPHYR	20	26	129.46	2344.15	AKLTKLSKDQADYISV	PYKPPHYRY_______	465	484	yes	yes	3;4	1.4822e-52		K	D	Q	Y	R	Y	1	1	0	2	0	1	1	1	1	2	0	1	0	0	4	1	0	0	3	1	0	1	631500000	0	0	0	33678000	13820000
A5C5K3	tr|A5C5K3|A5C5K3_VITVI	LPDPSSTDNAEFQIVLTIIR	20	10	92.474	2228.17	EEYAKSGKLPDPSSTD	QIVLTIIRDGLKTDPK	163	182	yes	yes	2;3	3.4904e-15		K	L	P	I	R	D	1	1	1	2	0	1	1	0	0	3	2	0	0	1	2	2	2	0	0	1	0	0	537930000	0	447950	0	231360000	134570000
A5C5K3	tr|A5C5K3|A5C5K3_VITVI	LYQMQANGTLLFPAINVNDSVTK	23	1	41.446	2536.3	ETTTGVKRLYQMQANG	NVNDSVTKSKFDNLYG	213	235	yes	yes	3	0.0001881		R	L	Y	T	K	S	2	0	3	1	0	2	0	1	0	1	3	1	1	1	1	1	2	0	1	2	0	0	44979000	0	0	0	4975000	7954200
A5C5K3	tr|A5C5K3|A5C5K3_VITVI	WVFPDTNSGIIVLAEGR	17	59	133.86	1872.97	TIKPQTDRWVFPDTNS	IIVLAEGRLMNLGCAT	378	394	yes	yes	2;3	2.8522e-38		R	W	V	G	R	L	1	1	1	1	0	0	1	2	0	2	1	0	0	1	1	1	1	1	0	2	0	0	1700000000	16847000	17292000	13086000	300250000	213880000
A5C5K3	tr|F6GTM7|F6GTM7_VITVI	ALDWGPGGGPDLIVDDGGDATLLIHEGVK	29	19	208.58	2886.44	EYWWCTERALDWGPGG	LLIHEGVKAEEEYERS	124	152	no	no	3	7.4783e-268		R	A	L	V	K	A	2	0	0	5	0	0	1	7	1	2	4	1	0	0	2	0	1	1	0	2	0	0	488900000	16535000	5073800	2018700	101480000	149820000
A5C5K3	tr|F6GTM7|F6GTM7_VITVI	ATDVMIAGK	9	2	62.463	904.469	SLPDGLMRATDVMIAG	TDVMIAGKVAVVCGYG	255	263	no	no	2	0.013003		R	A	T	G	K	V	2	0	0	1	0	0	0	1	0	1	0	1	1	0	0	0	1	0	0	1	0	0	15465000	6704800	6977400	0	0	0
A5C5K3	tr|F6GTM7|F6GTM7_VITVI	DMSQADFGR	9	2	82.645	1025.42	SGREYKVKDMSQADFG	MSQADFGRLEIELAEV	18	26	no	no	2	0.0023576		K	D	M	G	R	L	1	1	0	2	0	1	0	1	0	0	0	0	1	1	0	1	0	0	0	0	0	0	0	0	0	0	0	0
A5C5K3	tr|F6GTM7|F6GTM7_VITVI	DSAAVFAWK	9	32	153.78	993.492	HAAAAIARDSAAVFAW	SAAVFAWKGETLQEYW	102	110	no	no	1;2	4.4386e-06		R	D	S	W	K	G	3	0	0	1	0	0	0	0	0	0	0	1	0	1	0	1	0	1	0	1	0	0	535360000	13006000	13989000	11799000	115080000	111270000
A5C5K3	tr|F6GTM7|F6GTM7_VITVI	HSLPDGLMR	9	17	164.46	1024.51	FDNLYGCRHSLPDGLM	SLPDGLMRATDVMIAG	246	254	no	no	2	3.4296e-19	260	R	H	S	M	R	A	0	1	0	1	0	0	0	1	1	0	2	0	1	0	1	1	0	0	0	0	0	0	945530000	27845000	32669000	15760000	168370000	92512000
A5C5K3	tr|F6GTM7|F6GTM7_VITVI	ITGSLHMTIQTAVLIETLTALGAEVR	26	6	76.161	2737.5	QQPFKGARITGSLHMT	TALGAEVRWCSCNIFS	57	82	no	no	3	1.6641e-23	261	R	I	T	V	R	W	3	1	0	0	0	1	2	2	1	3	4	0	1	0	0	1	5	0	0	2	0	0	21861000	0	0	0	0	3478900
A5C5K3	tr|F6GTM7|F6GTM7_VITVI	KVYVLPK	7	1	106.42	845.537	KATGKYEKKVYVLPKH	KKVYVLPKHLDEKVAA	435	441	no	no	2	0.037899		K	K	V	P	K	H	0	0	0	0	0	0	0	0	0	0	1	2	0	0	1	0	0	0	1	2	0	1	8175700	4212900	3321200	641590	0	0
A5C5K3	tr|F6GTM7|F6GTM7_VITVI	LVGVSEETTTGVK	13	33	141.13	1318.7	KYRKMKERLVGVSEET	EETTTGVKRLYQMQAN	199	211	no	no	2	6.5078e-23		R	L	V	V	K	R	0	0	0	0	0	0	2	2	0	0	1	1	0	0	0	1	3	0	0	3	0	0	2034500000	30290000	32846000	25057000	227200000	172310000
A5C5K3	tr|F6GTM7|F6GTM7_VITVI	LVGVSEETTTGVKR	14	19	151.3	1474.8	KYRKMKERLVGVSEET	ETTTGVKRLYQMQANG	199	212	no	no	2;3	4.9379e-37		R	L	V	K	R	L	0	1	0	0	0	0	2	2	0	0	1	1	0	0	0	1	3	0	0	3	0	1	665640000	7889700	7153800	7238600	62643000	59986000
A5C5K3	tr|F6GTM7|F6GTM7_VITVI	TEFGPQQPFK	10	12	117.01	1177.58	MPGLMACRTEFGPQQP	FGPQQPFKGARITGSL	44	53	no	no	2	1.4742e-13		R	T	E	F	K	G	0	0	0	0	0	2	1	1	0	0	0	1	0	2	2	0	1	0	0	0	0	0	266280000	0	0	0	119880000	77889000
A5C6H7	tr|A5C6H7|A5C6H7_VITVI	ALENEMLLR	9	51	123.35	1087.57	VYILDQVRALENEMLL	LENEMLLRMQKQGLDV	314	322	no	no	2	2.582e-07	262	R	A	L	L	R	M	1	1	1	0	0	0	2	0	0	0	3	0	1	0	0	0	0	0	0	0	0	0	901180000	9296600	6570500	1251200	40782000	30577000
A5C6H7	tr|A5C6H7|A5C6H7_VITVI	ESLEPLLDFLR	11	23	139.32	1330.71	SSIMFRNKESLEPLLD	EPLLDFLRVHKYKGQV	175	185	no	no	2	1.9426e-15		K	E	S	L	R	V	0	1	0	1	0	0	2	0	0	0	4	0	0	1	1	1	0	0	0	0	0	0	368310000	2304700	1725400	1572600	20363000	9104700
A5C6H7	tr|A5C6H7|A5C6H7_VITVI	EYNLHGQFR	9	3	95.502	1162.55	EKMHDLMKEYNLHGQF	YNLHGQFRWMSSQTNR	636	644	yes	yes	2;3	0.0025115		K	E	Y	F	R	W	0	1	1	0	0	1	1	1	1	0	1	0	0	1	0	0	0	0	1	0	0	0	58422000	0	0	0	0	0
A5C6H7	tr|A5C6H7|A5C6H7_VITVI	GQVIMLNDR	9	19	67.334	1044.54	FLRVHKYKGQVIMLND	QVIMLNDRIQSISRLQ	191	199	yes	yes	2	0.0024906	263	K	G	Q	D	R	I	0	1	1	1	0	1	0	1	0	1	1	0	1	0	0	0	0	0	0	1	0	0	174850000	4279600	5475600	3356500	0	0
A5C6H7	tr|A5C6H7|A5C6H7_VITVI	HLSSIMFR	8	25	183.9	989.512	NGVQFLNRHLSSIMFR	HLSSIMFRNKESLEPL	165	172	no	no	2	1.1444e-30	264	R	H	L	F	R	N	0	1	0	0	0	0	0	0	1	1	1	0	1	1	0	2	0	0	0	0	0	0	726300000	0	2193800	546820	20249000	0
A5C6H7	tr|A5C6H7|A5C6H7_VITVI	LLYDPEQNEEHIGMLNDR	18	1	25.186	2185.01	ALHGSIEKLLYDPEQN	HIGMLNDRSKPIIFSM	553	570	yes	yes	3	0.024857		K	L	L	D	R	S	0	1	2	2	0	1	3	1	1	1	3	0	1	0	1	0	0	0	1	0	0	0	0	0	0	0	0	0
A5C6H7	tr|A5C6H7|A5C6H7_VITVI	LMTLAGVYGFWK	12	19	129.82	1384.72	TWKIYSERLMTLAGVY	AGVYGFWKYVSKLSRR	763	774	yes	yes	2	4.6392e-17	265	R	L	M	W	K	Y	1	0	0	0	0	0	0	2	0	0	2	1	1	1	0	0	1	1	1	1	0	0	293200000	0	0	0	5883800	0
A5C6H7	tr|A5C6H7|A5C6H7_VITVI	LPPETPFGEFEYEFQGMGFER	21	18	74.776	2506.12	KADDHLTKLPPETPFG	FQGMGFERGWGDTAQR	220	240	yes	yes	2;3	1.1976e-12	266	K	L	P	E	R	G	0	1	0	0	0	1	5	3	0	0	1	0	1	4	3	0	1	0	1	0	0	0	166550000	0	0	0	8395300	0
A5C6H7	tr|A5C6H7|A5C6H7_VITVI	LSDGPFGQILK	11	1	59.418	1173.64	GDDVGRQKLSDGPFGQ	GPFGQILKSTQEAIIL	64	74	yes	yes	2	0.017522		K	L	S	L	K	S	0	0	0	1	0	1	0	2	0	1	2	1	0	1	1	1	0	0	0	0	0	0	20428000	0	784600	0	0	0
A5C6H7	tr|A5C6H7|A5C6H7_VITVI	NKESLEPLLDFLR	13	15	164.68	1572.85	HLSSIMFRNKESLEPL	EPLLDFLRVHKYKGQV	173	185	no	no	3	3.1148e-44		R	N	K	L	R	V	0	1	1	1	0	0	2	0	0	0	4	1	0	1	1	1	0	0	0	0	0	1	197280000	1146500	0	0	10012000	0
A5C6H7	tr|A5C6H7|A5C6H7_VITVI	NTVGQYESHTAFTLPGLYR	19	1	79.489	2153.05	YQEIAGSKNTVGQYES	FTLPGLYRVVHGIDVF	491	509	yes	yes	3	1.2109e-09		K	N	T	Y	R	V	1	1	1	0	0	1	1	2	1	0	2	0	0	1	1	1	3	0	2	1	0	0	33407000	0	0	0	3651300	0
A5C6H7	tr|A5C6H7|A5C6H7_VITVI	PGVWEYVR	8	5	134.15	1004.51	VAIAVRPRPGVWEYVR	PGVWEYVRVNVHELSV	94	101	yes	yes	2	0.00028029		R	P	G	V	R	V	0	1	0	0	0	0	1	1	0	0	0	0	0	0	1	0	0	1	1	2	0	0	113580000	1791700	1941100	1937000	0	9558000
A5C6H7	tr|A5C6H7|A5C6H7_VITVI	QGLDVTPR	8	4	111.06	884.472	EMLLRMQKQGLDVTPR	QGLDVTPRILIVTRLI	326	333	yes	yes	2	0.0030176		K	Q	G	P	R	I	0	1	0	1	0	1	0	1	0	0	1	0	0	0	1	0	1	0	0	1	0	0	157170000	0	3554600	0	7692600	0
A5C6H7	tr|A5C6H7|A5C6H7_VITVI	RYLEMFYTLK	10	12	112.83	1362.7	KLSRRETRRYLEMFYT	LEMFYTLKFRDLAKSV	786	795	yes	yes	2;3	4.8108e-07		R	R	Y	L	K	F	0	1	0	0	0	0	1	0	0	0	2	1	1	1	0	0	1	0	2	0	0	1	77656000	0	0	0	0	0
A5C6H7	tr|A5C6H7|A5C6H7_VITVI	SNDREEIVEIEK	12	5	88.021	1459.72	AGYNDVKKSNDREEIV	EEIVEIEKMHDLMKEY	618	629	yes	yes	2;3	0.0015806		K	S	N	E	K	M	0	1	1	1	0	0	4	0	0	2	0	1	0	0	0	1	0	0	0	1	0	1	41813000	0	0	0	0	0
A5C6H7	tr|A5C6H7|A5C6H7_VITVI	SSSIGNGVQFLNR	13	25	184.58	1377.7	ASFPRPNRSSSIGNGV	NGVQFLNRHLSSIMFR	152	164	no	no	2	1.7719e-64		R	S	S	N	R	H	0	1	2	0	0	1	0	2	0	1	1	0	0	1	0	3	0	0	0	1	0	0	245060000	1898800	0	1832800	9894700	8776800
A5C6H7	tr|A5C6H7|A5C6H7_VITVI	STQEAIILPPFVAIAVR	17	1	49.223	1824.05	GPFGQILKSTQEAIIL	PFVAIAVRPRPGVWEY	75	91	yes	yes	2	0.0031621		K	S	T	V	R	P	3	1	0	0	0	1	1	0	0	3	1	0	0	1	2	1	1	0	0	2	0	0	23007000	0	0	0	0	2922500
A5C6H7	tr|A5C6H7|A5C6H7_VITVI	STQEAIILPPFVAIAVRPR	19	5	61.477	2077.2	GPFGQILKSTQEAIIL	VAIAVRPRPGVWEYVR	75	93	yes	yes	3	4.6339e-05		K	S	T	P	R	P	3	2	0	0	0	1	1	0	0	3	1	0	0	1	3	1	1	0	0	2	0	1	23591000	0	0	0	0	4720700
A5C6H7	tr|A5C6H7|A5C6H7_VITVI	SVPLAIDDQH	10	18	103.26	1093.54	LKFRDLAKSVPLAIDD	PLAIDDQH________	802	811	yes	yes	2	5.6262e-08		K	S	V	Q	H	-	1	0	0	2	0	1	0	0	1	1	1	0	0	0	1	1	0	0	0	1	0	0	390740000	0	0	2699800	17467000	10342000
A5C6H7	tr|A5C6H7|A5C6H7_VITVI	VNVHELSVDQLSVSEYLR	18	7	176.28	2086.07	PGVWEYVRVNVHELSV	LSVSEYLRFKEELVDG	102	119	yes	yes	2;3	1.127e-93		R	V	N	L	R	F	0	1	1	1	0	1	2	0	1	0	3	0	0	0	0	3	0	0	1	4	0	0	284670000	3591400	3114100	0	0	6432000
A5C6H7	tr|A5C6H7|A5C6H7_VITVI	VSGTEHSHILR	11	3	47.302	1234.64	TCNQRLERVSGTEHSH	TEHSHILRVPFRTDKG	356	366	yes	yes	3	0.0063723		R	V	S	L	R	V	0	1	0	0	0	0	1	1	2	1	1	0	0	0	0	2	1	0	0	1	0	0	2089600	0	0	0	0	0
A5C6H7	tr|A5C6H7|A5C6H7_VITVI	YLEMFYTLK	9	26	101.65	1206.6	LSRRETRRYLEMFYTL	LEMFYTLKFRDLAKSV	787	795	yes	yes	2	0.0010857	267	R	Y	L	L	K	F	0	0	0	0	0	0	1	0	0	0	2	1	1	1	0	0	1	0	2	0	0	0	505460000	763490	1454000	0	11092000	0
A5C6P2	tr|A5C6P2|A5C6P2_VITVI	HIAYNYQDLVFAPYGPR	17	0	35.089	2023	RPPNSGAKHIAYNYQD	VFAPYGPRWRMLRKIC	103	119	yes	yes	3	0.01015		K	H	I	P	R	W	2	1	1	1	0	1	0	1	1	1	1	0	0	1	2	0	0	0	3	1	0	0	26154000	0	0	0	0	0
A5C6P2	tr|A5C6P2|A5C6P2_VITVI	FLPGGERPNADVR	13	3	39.73	1426.73	PLEFRPNRFLPGGERP	ERPNADVRGNDFEVIP	416	428	yes	no	3	0.021435		R	F	L	V	R	G	1	2	1	1	0	0	1	2	0	0	1	0	0	1	2	0	0	0	0	1	0	1	126720000	0	0	0	13783000	11194000
A5C6P2	tr|A5C6P2|A5C6P2_VITVI	GNDFEVIPFGAGR	13	4	77.776	1377.67	ERPNADVRGNDFEVIP	VIPFGAGRRICAGMSL	429	441	yes	no	2	0.00074898		R	G	N	G	R	R	1	1	1	1	0	0	1	3	0	1	0	0	0	2	1	0	0	0	0	1	0	0	43838000	0	0	0	6397600	3071700
A5C6V1	tr|A5C6V1|A5C6V1_VITVI	AVAVVVDPIQSVK	13	4	76.073	1323.78	SFEALNQRAVAVVVDP	VDPIQSVKGKVVIDAF	140	152	yes	yes	2	0.00087906		R	A	V	V	K	G	2	0	0	1	0	1	0	0	0	1	0	1	0	0	1	1	0	0	0	5	0	0	93814000	3186700	2574600	3158000	21758000	17215000
A5C6V1	tr|A5C6V1|A5C6V1_VITVI	LINPQTMMLGQEPR	14	13	85.837	1626.82	KVVIDAFRLINPQTMM	MMLGQEPRQTTSNLGH	162	175	yes	yes	2	3.5476e-05	268;269	R	L	I	P	R	Q	0	1	1	0	0	2	1	1	0	1	2	0	2	0	2	0	1	0	0	0	0	0	50628000	0	0	0	19497000	4374700
A5C6V1	tr|A5C6V1|A5C6V1_VITVI	VVIDAFR	7	9	97.068	818.465	PIQSVKGKVVIDAFRL	KVVIDAFRLINPQTMM	155	161	yes	yes	2	0.010728		K	V	V	F	R	L	1	1	0	1	0	0	0	0	0	1	0	0	0	1	0	0	0	0	0	2	0	0	61403000	0	0	0	15580000	12118000
A5C6V7	tr|A5C6V7|A5C6V7_VITVI	VIQNLYPALSR	11	1	67.385	1272.72	STVDWKIRVIQNLYPA	NLYPALSRDVQLNPSS	75	85	yes	yes	2	0.0037575		R	V	I	S	R	D	1	1	1	0	0	1	0	0	0	1	2	0	0	0	1	1	0	0	1	1	0	0	30853000	0	0	0	7756400	0
A5C6X0	tr|A5C6X0|A5C6X0_VITVI	IVLLDFPAVPVK	12	9	59.198	1309.8	TFSAAIEKIVLLDFPA	DFPAVPVKAPK_____	91	102	yes	yes	2	0.0051715		K	I	V	V	K	A	1	0	0	1	0	0	0	0	0	1	2	1	0	1	2	0	0	0	0	3	0	0	21027000	2436800	2546300	3237400	3485600	2807400
A5C6X0	tr|A5C6X0|A5C6X0_VITVI	LVADIDAVK	9	2	54.539	942.539	EIVKGMEKLVADIDAV	VADIDAVKSFEWGQDL	28	36	yes	yes	2	0.025409		K	L	V	V	K	S	2	0	0	2	0	0	0	0	0	1	1	1	0	0	0	0	0	0	0	2	0	0	17468000	4813200	3897100	3937200	0	0
A5C6X0	tr|A5C6X0|A5C6X0_VITVI	SFEWGQDLESQEMLR	15	3	64.52	1853.83	VADIDAVKSFEWGQDL	LESQEMLRQGFTHAFL	37	51	yes	yes	2	0.0011076		K	S	F	L	R	Q	0	1	0	1	0	2	3	1	0	0	2	0	1	1	0	2	0	1	0	0	0	0	3610000	1233900	2078400	0	0	0
A5C718	tr|A5C718|A5C718_VITVI	EVDYLLR	7	34	180.49	906.481	LNDEQLCKEVDYLLRM	KEVDYLLRMKWIPCLE	88	94	yes	yes	1;2	1.6633e-11		K	E	V	L	R	M	0	1	0	1	0	0	1	0	0	0	2	0	0	0	0	0	0	0	1	1	0	0	1420400000	16261000	18583000	12192000	333740000	48139000
A5C718	tr|A5C718|A5C718_VITVI	IIGFDNNR	8	40	147.34	947.482	AYPDAHIRIIGFDNNR	IIGFDNNRQVQCIAFI	160	167	yes	yes	1;2	1.5269e-14		R	I	I	N	R	Q	0	1	2	1	0	0	0	1	0	2	0	0	0	1	0	0	0	0	0	0	0	0	4266600000	50032000	59898000	45648000	758510000	724130000
A5C718	tr|A5C718|A5C718_VITVI	SPGYYDGR	8	0	87.476	913.393	YPHREHNRSPGYYDGR	SPGYYDGRYWTMWKLP	117	124	yes	yes	2	0.01308		R	S	P	G	R	Y	0	1	0	1	0	0	0	2	0	0	0	0	0	0	1	1	0	0	2	0	0	0	1145600	0	0	0	0	650340
A5C718	tr|A5C718|A5C718_VITVI	TAYPDAHIR	9	4	113.71	1042.52	IKEVQEARTAYPDAHI	AYPDAHIRIIGFDNNR	151	159	yes	yes	2	0.00028903		R	T	A	I	R	I	2	1	0	1	0	0	0	0	1	1	0	0	0	0	1	0	1	0	1	0	0	0	44241000	21545000	22697000	0	0	0
A5C718	tr|A5C718|A5C718_VITVI	VWPTEGLMK	9	11	64.654	1059.54	GGRVRCMKVWPTEGLM	WPTEGLMKFETLSYLP	62	70	yes	yes	2	0.0027393	270	K	V	W	M	K	F	0	0	0	0	0	0	1	1	0	0	1	1	1	0	1	0	1	1	0	1	0	0	381000000	4529400	6049200	4073700	100390000	106810000
A5C7R4	tr|A5C7R4|A5C7R4_VITVI	ATVPGQLIWEIVK	13	8	73.927	1452.83	________________	QLIWEIVKKNSSFLVK	2	14	yes	yes	2	0.00025066		M	A	T	V	K	K	1	0	0	0	0	1	1	1	0	2	1	1	0	0	1	0	1	1	0	2	0	0	62411000	0	0	0	15885000	14920000
A5C7R4	tr|A5C7R4|A5C7R4_VITVI	AVSNQVGDNYYRPDLK	16	7	90.561	1837.9	KEFRRMAKAVSNQVGD	NYYRPDLKKAALARLS	99	114	yes	yes	2;3	9.4485e-07		K	A	V	L	K	K	1	1	2	2	0	1	0	1	0	0	1	1	0	0	1	1	0	0	2	2	0	1	74040000	407520	0	0	8931700	6105600
A5C961	tr|A5C961|A5C961_VITVI	LTFLESSGLAK	11	27	116.84	1164.64	AELGFLEKLTFLESSG	LESSGLAKYGAEALLV	179	189	yes	yes	2	7.5427e-08		K	L	T	A	K	Y	1	0	0	0	0	0	1	1	0	0	3	1	0	1	0	2	1	0	0	0	0	0	1351600000	11259000	16232000	12876000	95020000	102440000
A5C997	tr|A5C997|A5C997_VITVI	ALQLWETLK	9	2	93.649	1100.62	________________	LQLWETLKEAITAYTG	2	10	yes	yes	2	0.0027436		M	A	L	L	K	E	1	0	0	0	0	1	1	0	0	0	3	1	0	0	0	0	1	1	0	0	0	0	14980000	0	0	0	3506500	0
A5C997	tr|A5C997|A5C997_VITVI	ELFKEMEPLPPPVQLGEITEEELK	24	1	55.588	2794.43	PVHPVRERELFKEMEP	EITEEELKTYDGSDSK	53	76	yes	yes	3	2.1022e-06	271	R	E	L	L	K	T	0	0	0	0	0	1	7	1	0	1	4	2	1	1	4	0	1	0	0	1	0	1	48657000	0	0	0	21046000	0
A5C997	tr|A5C997|A5C997_VITVI	EMEPLPPPVQLGEITEEELK	20	43	139.11	2277.14	VRERELFKEMEPLPPP	EITEEELKTYDGSDSK	57	76	yes	yes	2;3	2.3103e-57	271	K	E	M	L	K	T	0	0	0	0	0	1	6	1	0	1	3	1	1	0	4	0	1	0	0	1	0	0	501780000	6422800	3814500	3182800	40390000	28415000
A5C997	tr|A5C997|A5C997_VITVI	GQIYDVSQGR	10	4	63.073	1121.55	KPLLMAIKGQIYDVSQ	IYDVSQGRIFYGPGGP	93	102	yes	yes	2	0.010535		K	G	Q	G	R	I	0	1	0	1	0	2	0	2	0	1	0	0	0	0	0	1	0	0	1	1	0	0	106310000	6243200	6670100	4072400	25686000	29111000
A5C997	tr|A5C997|A5C997_VITVI	IFYGPGGPYALFAGK	15	0	38.161	1556.8	IYDVSQGRIFYGPGGP	PYALFAGKDASRALAK	103	117	yes	yes	2	0.031437		R	I	F	G	K	D	2	0	0	0	0	0	0	4	0	1	1	1	0	2	2	0	0	0	2	0	0	0	74660000	4719900	4151200	2024600	17268000	20369000
A5C9D5	tr|A5C9D5|A5C9D5_VITVI	IEQELGTEIK	10	1	42.689	1158.61	EDRFNLYRIEQELGTE	QELGTEIKQIPPHIDQ	469	478	yes	yes	2	0.075192		R	I	E	I	K	Q	0	0	0	0	0	1	3	1	0	2	1	1	0	0	0	0	1	0	0	0	0	0	0	0	0	0	0	0
A5C9D5	tr|A5C9D5|A5C9D5_VITVI	LYQPVHLLVGTPGR	14	2	74.789	1548.88	SLKDDIMRLYQPVHLL	LLVGTPGRILDLSKKG	232	245	no	no	2;3	0.00093393		R	L	Y	G	R	I	0	1	0	0	0	1	0	2	1	0	3	0	0	0	2	0	1	0	1	2	0	0	29814000	0	0	0	9523300	2384700
A5C9Q0	tr|A5C9Q0|A5C9Q0_VITVI	DVLWTTHGSPLIPLTEFR	18	1	64.454	2081.09	SSSGDESRDVLWTTHG	LIPLTEFRQPEIMKKY	50	67	yes	yes	3	1.7603e-05		R	D	V	F	R	Q	0	1	0	1	0	0	1	1	1	1	3	0	0	1	2	1	3	1	0	1	0	0	6244700	2085100	2003500	0	0	0
A5C9Q0	tr|D7SK62|D7SK62_VITVI	LDSLVMGSR	9	3	58.246	976.501	CEAVEDLKLDSLVMGS	DSLVMGSRGLSTIRRI	120	128	no	no	2	0.0047505	272	K	L	D	S	R	G	0	1	0	1	0	0	0	1	0	0	2	0	1	0	0	2	0	0	0	1	0	0	32728000	0	0	1587800	0	4310900
A5C9T8	tr|A5C9T8|A5C9T8_VITVI	TPYLPFVADAAGR	13	40	139.7	1376.71	LGFCILGRTPYLPFVA	FVADAAGRQL______	204	216	yes	yes	2	1.0485e-22		R	T	P	G	R	Q	3	1	0	1	0	0	0	1	0	0	1	0	0	1	2	0	1	0	1	1	0	0	388610000	1721100	5198200	5869300	69754000	39583000
A5CAF6	tr|A5CAF6|A5CAF6_VITVI	AQGYGVGSSLVEEDK	15	10	116.86	1537.73	GMIFTFYKAQGYGVGS	SSLVEEDKLDLATSLL	233	247	yes	yes	2	3.0935e-17		K	A	Q	D	K	L	1	0	0	1	0	1	2	3	0	0	1	1	0	0	0	2	0	0	1	2	0	0	49447000	0	0	0	7089900	4427900
A5CAF6	tr|A5CAF6|A5CAF6_VITVI	AQGYGVGSSLVEEDKLDLATSLLEK	25	13	115.58	2621.34	GMIFTFYKAQGYGVGS	LATSLLEKAKSKGVSL	233	257	yes	yes	3	4.0555e-43		K	A	Q	E	K	A	2	0	0	2	0	1	3	3	0	0	5	2	0	0	0	3	1	0	1	2	0	1	334240000	5176900	3768600	2984100	105890000	36366000
A5CAF6	tr|A5CAF6|A5CAF6_VITVI	ELDYLVGAVSNPK	13	32	182.1	1403.73	VAGFLMQKELDYLVGA	VGAVSNPKRPFAAIVG	179	191	yes	yes	2	1.5389e-127		K	E	L	P	K	R	1	0	1	1	0	0	1	1	0	0	2	1	0	0	1	1	0	0	1	2	0	0	1506600000	21835000	24381000	16924000	168310000	114960000
A5CAF6	tr|A5CAF6|A5CAF6_VITVI	FALGTEAIAK	10	3	64.39	1019.57	MGVFEFDKFALGTEAI	LGTEAIAKKLADLSEK	332	341	yes	yes	2	0.0090213		K	F	A	A	K	K	3	0	0	0	0	0	1	1	0	1	1	1	0	1	0	0	1	0	0	0	0	0	89237000	0	3676200	0	31735000	16166000
A5CAF6	tr|A5CAF6|A5CAF6_VITVI	FYKEEEKNDPEFAK	14	28	252.43	1772.83	VLLLENVRFYKEEEKN	KNDPEFAKKLASLADL	123	136	yes	yes	2;3;4	4.7933e-235		R	F	Y	A	K	K	1	0	1	1	0	0	4	0	0	0	0	3	0	2	1	0	0	0	1	0	0	2	1132600000	21514000	17825000	12736000	135550000	142930000
A5CAF6	tr|A5CAF6|A5CAF6_VITVI	GVSLLLPADVVIADK	15	18	92.38	1508.88	LLEKAKSKGVSLLLPA	ADVVIADKFAADANSK	262	276	yes	yes	2	6.979e-07		K	G	V	D	K	F	2	0	0	2	0	0	0	1	0	1	3	1	0	0	1	1	0	0	0	3	0	0	416670000	9351500	0	8276500	82219000	74412000
A5CAF6	tr|A5CAF6|A5CAF6_VITVI	GVSLLLPADVVIADKFAADANSK	23	1	60.272	2313.26	LLEKAKSKGVSLLLPA	FAADANSKVVPASCIP	262	284	yes	yes	3	2.033e-08		K	G	V	S	K	V	5	0	1	3	0	0	0	1	0	1	3	2	0	1	1	2	0	0	0	3	0	1	13921000	0	0	0	0	4432300
A5CAF6	tr|A5CAF6|A5CAF6_VITVI	GVTTIIGGGDSVAAVEK	17	26	112.82	1572.84	KLADLSEKGVTTIIGG	DSVAAVEKVGLAEKMS	350	366	yes	yes	2	1.4884e-20		K	G	V	E	K	V	2	0	0	1	0	0	1	4	0	2	0	1	0	0	0	1	2	0	0	3	0	0	245270000	6733400	5044800	5108800	54546000	45667000
A5CAF6	tr|A5CAF6|A5CAF6_VITVI	IGVIESLLGK	10	32	131.12	1027.63	GGSKVSSKIGVIESLL	VIESLLGKVDVLLLGG	207	216	yes	yes	1;2	6.4631e-08		K	I	G	G	K	V	0	0	0	0	0	0	1	2	0	2	2	1	0	0	0	1	0	0	0	1	0	0	751350000	1156600	23501000	7875900	74182000	4072400
A5CAF6	tr|A5CAF6|A5CAF6_VITVI	IPEGGVLLLENVR	13	56	164	1407.81	EVKILVAKIPEGGVLL	VLLLENVRFYKEEEKN	110	122	yes	yes	2;3	6.9205e-44		K	I	P	V	R	F	0	1	1	0	0	0	2	2	0	1	3	0	0	0	1	0	0	0	0	2	0	0	1722800000	13525000	40172000	27949000	353080000	50800000
A5CAF6	tr|A5CAF6|A5CAF6_VITVI	KLASLADLYVNDAFGTAHR	19	4	80.752	2061.06	KNDPEFAKKLASLADL	DAFGTAHRAHASTEGV	137	155	yes	yes	3	5.8651e-10		K	K	L	H	R	A	4	1	1	2	0	0	0	1	1	0	3	1	0	1	0	1	1	0	1	1	0	1	85238000	622370	0	1374900	25874000	8896200
A5CAF6	tr|A5CAF6|A5CAF6_VITVI	LASLADLYVNDAFGTAHR	18	57	246.95	1932.97	NDPEFAKKLASLADLY	DAFGTAHRAHASTEGV	138	155	yes	yes	2;3	4.0346e-249		K	L	A	H	R	A	4	1	1	2	0	0	0	1	1	0	3	0	0	1	0	1	1	0	1	1	0	0	738810000	11532000	19637000	17829000	221230000	31730000
A5CAF6	tr|A5CAF6|A5CAF6_VITVI	LDLATSLLEK	10	5	94.465	1101.63	SSLVEEDKLDLATSLL	LATSLLEKAKSKGVSL	248	257	yes	yes	2	0.00070121		K	L	D	E	K	A	1	0	0	1	0	0	1	0	0	0	4	1	0	0	0	1	1	0	0	0	0	0	43278000	0	0	0	0	0
A5CAF6	tr|A5CAF6|A5CAF6_VITVI	LSELLGVEVK	10	42	146.11	1085.63	SLKPLVPRLSELLGVE	ELLGVEVKMANDCIGE	84	93	yes	yes	2	1.5609e-14		R	L	S	V	K	M	0	0	0	0	0	0	2	1	0	0	3	1	0	0	0	1	0	0	0	2	0	0	1332500000	26029000	14128000	14833000	112980000	288700000
A5CAF6	tr|A5CAF6|A5CAF6_VITVI	SVGDLKEADLK	11	3	95.094	1173.62	________________	DLKEADLKGKRVFVRV	6	16	yes	yes	2	0.0026345		R	S	V	L	K	G	1	0	0	2	0	0	1	1	0	0	2	2	0	0	0	1	0	0	0	1	0	1	23271000	0	0	0	0	0
A5CAF6	tr|A5CAF6|A5CAF6_VITVI	TFGESLDTTK	10	4	77.062	1097.52	DIGPDSIKTFGESLDT	GESLDTTKTIIWNGPM	307	316	yes	yes	2	0.0029264		K	T	F	T	K	T	0	0	0	1	0	0	1	1	0	0	1	1	0	1	0	1	3	0	0	0	0	0	134140000	0	0	0	60522000	0
A5CAF6	tr|A5CAF6|A5CAF6_VITVI	TLPGVLALDDA	11	4	68.525	1083.58	SLELLEGKTLPGVLAL	GVLALDDA________	391	401	yes	yes	2	0.0034148		K	T	L	D	A	-	2	0	0	2	0	0	0	1	0	0	3	0	0	0	1	0	1	0	0	1	0	0	29953000	0	1419100	1220900	8523300	5363300
A5CAF6	tr|A5CAF6|A5CAF6_VITVI	VDLNVPLDESLK	12	36	111.79	1340.72	KGKRVFVRVDLNVPLD	VPLDESLKITDDTRVR	24	35	yes	yes	2	1.2231e-07		R	V	D	L	K	I	0	0	1	2	0	0	1	0	0	0	3	1	0	0	1	1	0	0	0	2	0	0	2462800000	9706300	28056000	15686000	203040000	109000000
A5CAF6	tr|A5CAF6|A5CAF6_VITVI	VDVLLLGGGMIFTFYK	16	6	53.565	1771.96	VIESLLGKVDVLLLGG	GMIFTFYKAQGYGVGS	217	232	yes	yes	2	0.00068566	273	K	V	D	Y	K	A	0	0	0	1	0	0	0	3	0	1	3	1	1	2	0	0	1	0	1	2	0	0	47779000	0	0	0	3633500	4510300
A5CAF6	tr|A5CAF6|A5CAF6_VITVI	VILASHLGR	9	28	154.49	964.582	YLMGHGAKVILASHLG	ILASHLGRPKGVTPKY	59	67	yes	yes	2	2.0857e-13		K	V	I	G	R	P	1	1	0	0	0	0	0	1	1	1	2	0	0	0	0	1	0	0	0	1	0	0	2218800000	23062000	17022000	11548000	196010000	226790000
A5CAF6	tr|A5CAF6|A5CAF6_VITVI	VILASHLGRPK	11	28	187.16	1189.73	YLMGHGAKVILASHLG	ASHLGRPKGVTPKYSL	59	69	yes	yes	2;3	6.918e-54		K	V	I	P	K	G	1	1	0	0	0	0	0	1	1	1	2	1	0	0	1	1	0	0	0	1	0	1	934620000	2335400	3088900	1443900	51086000	52927000
A5CAF6	tr|A5CAF6|A5CAF6_VITVI	YLKPSVAGFLMQK	13	34	145.6	1480.81	ASTEGVAKYLKPSVAG	VAGFLMQKELDYLVGA	166	178	yes	yes	2;3	2.8783e-28	274	K	Y	L	Q	K	E	1	0	0	0	0	1	0	1	0	0	2	2	1	1	1	1	0	0	1	1	0	1	489720000	2942200	1370400	0	50353000	39855000
A5CAF6	tr|A5CAF6|A5CAF6_VITVI	YSLKPLVPR	9	38	133.13	1071.64	RPKGVTPKYSLKPLVP	SLKPLVPRLSELLGVE	75	83	yes	yes	2;3	9.894e-06		K	Y	S	P	R	L	0	1	0	0	0	0	0	0	0	0	2	1	0	0	2	1	0	0	1	1	0	1	1885000000	7040700	8616200	6069900	151870000	113550000
A5CAF8	tr|A5CAF8|A5CAF8_VITVI	AQGLSVGSSLVEEDK	15	0	64.665	1517.76	GMIFTFYKAQGLSVGS	SSLVEEDKLSLATSLL	305	319	yes	yes	2	0.0027524		K	A	Q	D	K	L	1	0	0	1	0	1	2	2	0	0	2	1	0	0	0	3	0	0	0	2	0	0	39038000	0	0	0	9692700	5467600
A5CAF8	tr|A5CAF8|A5CAF8_VITVI	ELDYLVGAVSSPK	13	31	136.24	1376.72	VAGFLLQKELDYLVGA	VGAVSSPKRPFAAIVG	251	263	yes	yes	2	2.0162e-22		K	E	L	P	K	R	1	0	0	1	0	0	1	1	0	0	2	1	0	0	1	2	0	0	1	2	0	0	241200000	3959200	8274500	6244100	43093000	28163000
A5CAF8	tr|A5CAF8|A5CAF8_VITVI	FLKPSVAGFLLQK	13	5	54.199	1446.86	ASTEGVTKFLKPSVAG	VAGFLLQKELDYLVGA	238	250	yes	yes	3	0.0035331		K	F	L	Q	K	E	1	0	0	0	0	1	0	1	0	0	3	2	0	2	1	1	0	0	0	1	0	1	11775000	0	0	0	4141200	0
A5CAF8	tr|A5CAF8|A5CAF8_VITVI	FSLAPLVPR	9	39	146.81	998.591	RPKGVTPKFSLAPLVP	SLAPLVPRLSELLGIQ	147	155	yes	yes	2	1.1658e-09		K	F	S	P	R	L	1	1	0	0	0	0	0	0	0	0	2	0	0	1	2	1	0	0	0	1	0	0	272050000	6009700	6616600	3416300	53186000	11424000
A5CAF8	tr|A5CAF8|A5CAF8_VITVI	FYKEEEKNEPEFAK	14	2	139.49	1786.84	VLLLENVRFYKEEEKN	KNEPEFAKKLASIADL	195	208	yes	yes	3	2.367e-30		R	F	Y	A	K	K	1	0	1	0	0	0	5	0	0	0	0	3	0	2	1	0	0	0	1	0	0	2	61798000	1511200	0	1842500	11855000	15129000
A5CAF8	tr|A5CAF8|A5CAF8_VITVI	GVSLLLPTDVVIADK	15	9	95.067	1538.89	LLEKAKAKGVSLLLPT	TDVVIADKFAPDANSK	334	348	yes	yes	2	4.4196e-07		K	G	V	D	K	F	1	0	0	2	0	0	0	1	0	1	3	1	0	0	1	1	1	0	0	3	0	0	135200000	4281300	3563800	4416500	26032000	40463000
A5CAF8	tr|A5CAF8|A5CAF8_VITVI	IFNEALETTK	10	7	86.344	1164.6	DIGPDSIKIFNEALET	NEALETTKTVIWNGPM	379	388	yes	yes	2	0.001501		K	I	F	T	K	T	1	0	1	0	0	0	2	0	0	1	1	1	0	1	0	0	2	0	0	0	0	0	64937000	3335000	2614400	2617400	17119000	18905000
A5CAF8	tr|A5CAF8|A5CAF8_VITVI	IGVIESLLEK	10	4	112.95	1099.65	GGSKVSSKIGVIESLL	VIESLLEKCDILLLGG	279	288	yes	yes	2	2.5394e-06		K	I	G	E	K	C	0	0	0	0	0	0	2	1	0	2	2	1	0	0	0	1	0	0	0	1	0	0	73481000	0	1762600	954160	15908000	0
A5CAF8	tr|A5CAF8|A5CAF8_VITVI	IVPASAIPDGWMGLDIGPDSIK	22	2	38.724	2251.16	FAPDANSKIVPASAIP	DIGPDSIKIFNEALET	357	378	yes	yes	3	0.00041662		K	I	V	I	K	I	2	0	0	3	0	0	0	3	0	4	1	1	1	0	3	2	0	1	0	1	0	0	12317000	0	0	0	9032900	3284400
A5CAF8	tr|A5CAF8|A5CAF8_VITVI	LSELLGIQIVK	11	14	123.51	1211.75	SLAPLVPRLSELLGIQ	LLGIQIVKADDCIGPE	156	166	yes	yes	2	7.1245e-21		R	L	S	V	K	A	0	0	0	0	0	1	1	1	0	2	3	1	0	0	0	1	0	0	0	1	0	0	61559000	393810	1512200	1408700	29653000	1261700
A5CAF8	tr|A5CAF8|A5CAF8_VITVI	LSLATSLLEK	10	2	59.198	1073.63	SSLVEEDKLSLATSLL	LATSLLEKAKAKGVSL	320	329	yes	yes	2	0.014993		K	L	S	E	K	A	1	0	0	0	0	0	1	0	0	0	4	1	0	0	0	2	1	0	0	0	0	0	59158000	1405200	0	1509800	22454000	13413000
A5CAF8	tr|A5CAF8|A5CAF8_VITVI	LVTALPDGGVLLLENVR	17	13	129.05	1778.03	CIGPEVEKLVTALPDG	VLLLENVRFYKEEEKN	178	194	yes	yes	2;3	1.9001e-37		K	L	V	V	R	F	1	1	1	1	0	0	1	2	0	0	5	0	0	0	1	0	1	0	0	3	0	0	279540000	6541400	12802000	3947300	76822000	61523000
A5CAF8	tr|A5CAF8|A5CAF8_VITVI	VDLNVPLDDNQK	12	16	101.53	1368.69	KGKKVFVRVDLNVPLD	VPLDDNQKITDDTRVR	96	107	yes	yes	2	2.2614e-05		R	V	D	Q	K	I	0	0	2	3	0	1	0	0	0	0	2	1	0	0	1	0	0	0	0	2	0	0	310790000	7927500	8146800	8206000	42082000	20782000
A5CAF8	tr|A5CAF8|A5CAF8_VITVI	VILSSHLGRPK	11	25	172.8	1205.72	YLIDNGAKVILSSHLG	SSHLGRPKGVTPKFSL	131	141	yes	yes	2;3	2.4617e-41		K	V	I	P	K	G	0	1	0	0	0	0	0	1	1	1	2	1	0	0	1	2	0	0	0	1	0	1	272840000	2652400	4779000	2038200	38932000	41975000
A5CAF8	tr|A5CAF6|A5CAF6_VITVI	RPFAAIVGGSK	11	38	117.95	1101.63	VGAVSNPKRPFAAIVG	AAIVGGSKVSSKIGVI	192	202	no	no	2;3	8.4785e-10		K	R	P	S	K	V	2	1	0	0	0	0	0	2	0	1	0	1	0	1	1	1	0	0	0	1	0	1	2669700000	30957000	30005000	15537000	246640000	288640000
A5CAL1	tr|A5CAL1|A5CAL1_VITVI	AVVGNSFIGADAQMIEALPK	20	7	95.361	2030.05	REHSNSIRAVVGNSFI	QMIEALPKMEIVSSFS	48	67	yes	yes	2	1.0071e-14		R	A	V	P	K	M	4	0	1	1	0	1	1	2	0	2	1	1	1	1	1	1	0	0	0	2	0	0	118740000	4046300	3796400	1691000	22278000	18273000
A5CAL1	tr|A5CAL1|A5CAL1_VITVI	FWDFPSANDLFR	12	26	136.7	1513.7	DKRFKLFRFWDFPSAN	PSANDLFREHSNSIRA	29	40	yes	yes	2	2.655e-16		R	F	W	F	R	E	1	1	1	2	0	0	0	0	0	0	1	0	0	3	1	1	0	1	0	0	0	0	165730000	3697200	2786300	2943100	39973000	24397000
A5CAL1	tr|A5CAL1|A5CAL1_VITVI	GLHVDEPELVSALVEGR	17	8	133.86	1818.95	GVVINIGRGLHVDEPE	VSALVEGRLGGAGLDV	233	249	yes	yes	2;3	1.3699e-37		R	G	L	G	R	L	1	1	0	1	0	0	3	2	1	0	3	0	0	0	1	1	0	0	0	3	0	0	171600000	1319100	4223800	2732600	54962000	10853000
A5CAL1	tr|A5CAL1|A5CAL1_VITVI	GVVINIGR	8	20	94.262	826.502	VINALGPKGVVINIGR	GVVINIGRGLHVDEPE	225	232	yes	yes	2	0.00060512		K	G	V	G	R	G	0	1	1	0	0	0	0	2	0	2	0	0	0	0	0	0	0	0	0	2	0	0	356770000	3506800	2710500	0	48619000	32590000
A5CAL1	tr|A5CAL1|A5CAL1_VITVI	LGGAGLDVFENEPNVPEELLAMDNVVLLPHVGSGTVETR	39	3	37.763	4087.06	VSALVEGRLGGAGLDV	GSGTVETRKDMADLVL	250	288	yes	yes	3;4	2.4299e-05		R	L	G	T	R	K	2	1	3	2	0	0	5	5	1	0	6	0	1	1	3	1	2	0	0	6	0	0	39673000	2733800	0	0	16252000	11277000
A5CAL1	tr|A5CAL1|A5CAL1_VITVI	SVGIIGLGR	9	23	103.87	870.529	LTTKFTGKSVGIIGLG	VGIIGLGRIGSAIAKR	146	154	yes	yes	2	0.0012056		K	S	V	G	R	I	0	1	0	0	0	0	0	3	0	2	1	0	0	0	0	1	0	0	0	1	0	0	959960000	10927000	12187000	11384000	89775000	14688000
A5CBB3	tr|A5CBB3|A5CBB3_VITVI	NSWGENWGDNGYFK	14	4	83.692	1672.69	GVAYWLIKNSWGENWG	WGDNGYFKMELGKNMC	329	342	yes	yes	2	0.00029772		K	N	S	F	K	M	0	0	3	1	0	0	1	3	0	0	0	1	0	1	0	1	0	2	1	0	0	0	28158000	0	0	0	3474800	0
A5CBB3	tr|A5CBB3|A5CBB3_VITVI	PVSVAFEVVHDFR	13	1	36.944	1500.77	KHAVAFVRPVSVAFEV	FEVVHDFRFYKKGVYT	276	288	yes	yes	2	0.065941		R	P	V	F	R	F	1	1	0	1	0	0	1	0	1	0	0	0	0	2	1	1	0	0	0	4	0	0	8712800	0	0	0	0	1550700
A8QK92	tr|A8QK92|A8QK92_VITVI	AAVTPAFAPQFPGLNGLGLSIAR	23	1	26.157	2267.24	GNTSNLIKAAVTPAFA	GLGLSIARLDLAVGGV	66	88	yes	yes	3	0.0048112		K	A	A	A	R	L	5	1	1	0	0	1	0	3	0	1	3	0	0	2	3	1	1	0	0	1	0	0	1471300	1471300	0	0	0	0
B2LXS2	tr|B2LXS2|B2LXS2_VITVI	ASFDEAPPGNPAAGEK	16	36	94.487	1556.71	________________	GNPAAGEKIFKTKCAQ	2	17	yes	yes	2	4.4478e-08		M	A	S	E	K	I	4	0	1	1	0	0	2	2	0	0	0	1	0	1	3	1	0	0	0	0	0	0	364070000	0	2593300	3280800	26726000	51139000
B2LXS2	tr|B2LXS2|B2LXS2_VITVI	NMAVIWEEK	9	31	106.16	1118.54	YSYSAANKNMAVIWEE	MAVIWEEKTLYDYLLN	63	71	yes	yes	2	0.00020489	275	K	N	M	E	K	T	1	0	1	0	0	0	2	0	0	1	0	1	1	0	0	0	0	1	0	1	0	0	515480000	6403100	4404700	1585500	38547000	24063000
B2LXS2	tr|B2LXS2|B2LXS2_VITVI	QSGTTPGYSYSAANK	15	22	150.55	1530.7	NLNGLFGRQSGTTPGY	YSYSAANKNMAVIWEE	48	62	yes	yes	2	1.305e-47		R	Q	S	N	K	N	2	0	1	0	0	1	0	2	0	0	0	1	0	0	1	3	2	0	2	0	0	0	1039600000	9230500	12629000	7311200	54382000	56758000
B2LXS2	tr|B2LXS2|B2LXS2_VITVI	QGPNLNGLFGR	11	16	130.41	1171.61	VDKGAGHKQGPNLNGL	NLNGLFGRQSGTTPGY	37	47	no	no	2	1.4873e-27		K	Q	G	G	R	Q	0	1	2	0	0	1	0	3	0	0	2	0	0	1	1	0	0	0	0	0	0	0	350010000	0	2605800	2025900	30399000	28089000
B2LXS2	tr|B2LXS2|B2LXS2_VITVI	ADLIAYLK	8	43	82.671	905.522	GLKKPQDRADLIAYLK	ADLIAYLKQATA____	101	108	no	no	1;2	0.0072611		R	A	D	L	K	Q	2	0	0	1	0	0	0	0	0	1	2	1	0	0	0	0	0	0	1	0	0	0	1646700000	7563200	11708000	9232800	96460000	65046000
B6VJS5	tr|B6VJS5|B6VJS5_VITVI	VMAFVQR	7	1	79.454	849.453	FLVLAERKVMAFVQRR	KVMAFVQRRKGPDVVG	32	38	yes	yes	2	0.013741		K	V	M	Q	R	R	1	1	0	0	0	1	0	0	0	0	0	0	1	1	0	0	0	0	0	2	0	0	0	0	0	0	0	0
B6VJS5	tr|B6VJS5|B6VJS5_VITVI	YAFLGALR	8	7	79.469	909.507	AGRSSNSKYAFLGALR	YAFLGALRSAAQMVPY	134	141	yes	yes	2	0.0081662		K	Y	A	L	R	S	2	1	0	0	0	0	0	1	0	0	2	0	0	1	0	0	0	0	1	0	0	0	101210000	1054200	0	0	14175000	7650600
B6VJT0	tr|B6VJT0|B6VJT0_VITVI	MFFDTPR	7	26	138.85	912.416	YYIRFAKRMFFDTPRT	RMFFDTPRTWILYEPM	436	442	yes	yes	2	0.00025257	277	R	M	F	P	R	T	0	1	0	1	0	0	0	0	0	0	0	0	1	2	1	0	1	0	0	0	0	0	170350000	0	0	0	17063000	15291000
B6VJT0	tr|B6VJT0|B6VJT0_VITVI	TWILYEPMDR	10	3	64.82	1322.63	RMFFDTPRTWILYEPM	ILYEPMDRDKSLLLAM	443	452	yes	yes	2	0.0022646	278	R	T	W	D	R	D	0	1	0	1	0	0	1	0	0	1	1	0	1	0	1	0	1	1	1	0	0	0	27350000	0	0	0	0	4385000
B6VJT0	tr|B6VJT0|B6VJT0_VITVI	ILTGYEITGAR	11	12	84.479	1192.65	THFDQLAKILTGYEIT	GYEITGARSSGLFMGI	201	211	yes	no	2	0.00055663		K	I	L	A	R	S	1	1	0	0	0	0	1	2	0	2	1	0	0	0	0	0	2	0	1	0	0	0	265790000	3778700	3728700	3584200	32682000	11243000
B6VJT7	tr|B6VJT7|B6VJT7_VITVI	DVEGGWLLR	9	40	123.5	1043.54	NSVEHVMRDVEGGWLL	VEGGWLLRYMHANGAS	77	85	yes	yes	2	3.6539e-05		R	D	V	L	R	Y	0	1	0	1	0	0	1	2	0	0	2	0	0	0	0	0	0	1	0	1	0	0	1026200000	5184200	11269000	6730000	108400000	21745000
B6VJT7	tr|B6VJT7|B6VJT7_VITVI	GIPNSYTDETDHT	13	61	168.3	1448.61	PIPGRVGRGIPNSYTD	YTDETDHT________	381	393	yes	yes	2	1.703e-44		R	G	I	H	T	-	0	0	1	2	0	0	1	1	1	1	0	0	0	0	1	1	3	0	1	0	0	0	1339800000	21122000	17942000	14625000	125330000	77915000
B6VJT7	tr|B6VJT7|B6VJT7_VITVI	ISFYPYFYVK	10	12	77.662	1325.67	GVHSEMDKISFYPYFY	FYPYFYVKDLVGRVAS	225	234	yes	yes	2	0.0028112		K	I	S	V	K	D	0	0	0	0	0	0	0	0	0	1	0	1	0	2	1	1	0	0	3	1	0	0	113610000	0	0	0	7368600	5546500
B6VJT9	tr|B6VJT9|B6VJT9_VITVI	FGYEVSFEALDK	12	0	49.298	1403.66	FLVRSFLRFGYEVSFE	VSFEALDKGAIEILGP	580	591	yes	yes	2	0.012221		R	F	G	D	K	G	1	0	0	1	0	0	2	1	0	0	1	1	0	2	0	1	0	0	1	1	0	0	4818800	0	0	0	0	2653400
B6VJT9	tr|B6VJT9|B6VJT9_VITVI	GAIEILGPYGISYTFR	16	7	66.022	1755.92	VSFEALDKGAIEILGP	YGISYTFRRLAERISQ	592	607	yes	yes	2	0.00051024		K	G	A	F	R	R	1	1	0	0	0	0	1	3	0	3	1	0	0	1	1	1	1	0	2	0	0	0	105960000	0	0	0	5235400	7202200
B6VJV3	tr|B6VJV3|B6VJV3_VITVI	ASIVELIR	8	28	178.65	899.544	FVPGCTLKASIVELIR	ASIVELIREGLAVLRM	170	177	yes	yes	2	2.9618e-30		K	A	S	I	R	E	1	1	0	0	0	0	1	0	0	2	1	0	0	0	0	1	0	0	0	1	0	0	470170000	3983400	5589500	4029300	56891000	71535000
B6VJV3	tr|B6VJV3|B6VJV3_VITVI	EGLAVLR	7	1	78.616	756.449	ASIVELIREGLAVLRM	REGLAVLRMVRVGGSL	178	184	yes	yes	2	0.029124		R	E	G	L	R	M	1	1	0	0	0	0	1	1	0	0	2	0	0	0	0	0	0	0	0	1	0	0	578020000	0	12926000	9651300	81990000	67417000
B6VJV3	tr|B6VJV3|B6VJV3_VITVI	LQDDLVTGFHFSVSER	16	11	130.29	1848.9	ATSSRRIRLQDDLVTG	FHFSVSERFVPGCTLK	146	161	yes	yes	2;3	3.0069e-30		R	L	Q	E	R	F	0	1	0	2	0	1	1	1	1	0	2	0	0	2	0	2	1	0	0	2	0	0	47586000	194780	786450	0	0	26498000
B6VJV5	tr|B6VJV5|B6VJV5_VITVI	FEVVYNLLSTR	11	12	85.554	1339.71	DHPSRKRRFEVVYNLL	VYNLLSTRYNSRIRVQ	71	81	yes	yes	2	0.00051708		R	F	E	T	R	Y	0	1	1	0	0	0	1	0	0	0	2	0	0	1	0	1	1	0	1	2	0	0	325950000	1940200	4479200	1863700	41077000	6666900
B6VJV5	tr|B6VJV5|B6VJV5_VITVI	IRVQTSADEVTR	12	3	77.367	1373.73	LSTRYNSRIRVQTSAD	TSADEVTRISPVVSPF	86	97	yes	yes	3	0.00025448		R	I	R	T	R	I	1	2	0	1	0	1	1	0	0	1	0	0	0	0	0	1	2	0	0	2	0	1	13581000	0	0	647350	4883800	6814700
B6VJV5	tr|B6VJV5|B6VJV5_VITVI	RFEVVYNLLSTR	12	10	100.22	1495.81	VDHPSRKRRFEVVYNL	VYNLLSTRYNSRIRVQ	70	81	yes	yes	3	5.007e-06		R	R	F	T	R	Y	0	2	1	0	0	0	1	0	0	0	2	0	0	1	0	1	1	0	1	2	0	1	64544000	0	0	0	15474000	0
B6VJV5	tr|B6VJV5|B6VJV5_VITVI	VVSEPIEMTQEFR	13	28	158.01	1563.76	RYDDPEKRVVSEPIEM	IEMTQEFRYFDSASPW	164	176	yes	yes	2	2.7289e-36	279	R	V	V	F	R	Y	0	1	0	0	0	1	3	0	0	1	0	0	1	1	1	1	1	0	0	2	0	0	235510000	7193900	11065000	12132000	79075000	19990000
B6VJV5	tr|B6VJV5|B6VJV5_VITVI	YSWETFPK	8	23	91.318	1056.49	MDNQSIFKYSWETFPK	YSWETFPKKWVRKMER	9	16	yes	yes	2	0.006772		K	Y	S	P	K	K	0	0	0	0	0	0	1	0	0	0	0	1	0	1	1	1	1	1	1	0	0	0	108000000	0	1107800	916790	11446000	12119000
B6VJY3	tr|B6VJY3|B6VJY3_VITVI	DNGMHALIIYDDLSK	15	12	131.45	1703.82	CAMGEYFRDNGMHALI	IIYDDLSKQAVAYRQM	262	276	yes	yes	2;3	2.8759e-29	280	R	D	N	S	K	Q	1	0	1	3	0	0	0	1	1	2	2	1	1	0	0	1	0	0	1	0	0	0	72828000	1346900	0	0	22775000	19069000
B6VJY3	tr|B6VJY3|B6VJY3_VITVI	EAFPGDVFYLHSR	13	203	162.31	1536.74	LLRRPPGREAFPGDVF	DVFYLHSRLLERAAKR	295	307	yes	yes	2;3	8.9714e-44		R	E	A	S	R	L	1	1	0	1	0	0	1	1	1	0	1	0	0	2	1	1	0	0	1	1	0	0	586730000	15295000	15225000	9599000	101430000	74979000
B6VJY3	tr|B6VJY3|B6VJY3_VITVI	SVHEPMQTGLK	11	8	115.57	1225.61	APGIIERKSVHEPMQT	EPMQTGLKAVDSLVPI	143	153	yes	yes	2;3	6.9276e-08		K	S	V	L	K	A	0	0	0	0	0	1	1	1	1	0	1	1	1	0	1	1	1	0	0	1	0	0	39604000	14866000	15154000	981770	0	0
B6VJY3	tr|B6VJY3|B6VJY3_VITVI	VYGLNEIQAGEMVEFASGVK	20	6	168.79	2140.05	SVGDGIARVYGLNEIQ	VEFASGVKGIALNLEN	43	62	yes	yes	2	1.0455e-95	281	R	V	Y	V	K	G	2	0	1	0	0	1	3	3	0	1	1	1	1	1	0	1	0	0	1	3	0	0	65822000	7623200	8438300	4694300	12628000	0
B6VJY3	tr|B6VJY3|B6VJY3_VITVI	AVDSLVPIGR	10	42	160.36	1025.59	EPMQTGLKAVDSLVPI	DSLVPIGRGQRELIIG	154	163	yes	no	2	2.4273e-20		K	A	V	G	R	G	1	1	0	1	0	0	0	1	0	1	1	0	0	0	1	1	0	0	0	2	0	0	1471500000	21459000	26215000	19329000	169610000	89901000
B6VJY3	tr|B6VJY3|B6VJY3_VITVI	ESALPYL	7	4	136.19	791.407	MEPDAFLKESALPYL_	KESALPYL________	503	509	yes	no	1	0.019555		K	E	S	Y	L	-	1	0	0	0	0	0	1	0	0	0	2	0	0	0	1	1	0	0	1	0	0	0	96606000	4264800	5855600	6491000	35871000	25322000
B6VJY3	tr|B6VJY3|B6VJY3_VITVI	GIRPAINVGLSVSR	14	7	121.92	1437.84	SETELFYRGIRPAINV	NVGLSVSRVGSAAQLK	363	376	yes	no	2;3	1.399e-15		R	G	I	S	R	V	1	2	1	0	0	0	0	2	0	2	1	0	0	0	1	2	0	0	0	2	0	1	457850000	5216800	4413300	2032700	49774000	26161000
B6VJY3	tr|B6VJY3|B6VJY3_VITVI	ITNFYTNLK	9	3	67.704	1112.59	LTTLLESRITNFYTNL	TNFYTNLKVDEIGRVV	18	26	yes	no	2	0.0088615		R	I	T	L	K	V	0	0	2	0	0	0	0	0	0	1	1	1	0	1	0	0	2	0	1	0	0	0	48975000	10358000	8276000	6426500	0	16794000
B6VJY3	tr|B6VJY3|B6VJY3_VITVI	ITNFYTNLKVDEIGR	15	3	54.281	1781.93	LTTLLESRITNFYTNL	LKVDEIGRVVSVGDGI	18	32	yes	no	2;3	0.0014347		R	I	T	G	R	V	0	1	2	1	0	0	1	1	0	2	1	1	0	1	0	0	2	0	1	1	0	1	20701000	0	2104300	0	6841700	0
B6VJY3	tr|B6VJY3|B6VJY3_VITVI	LELAQYR	7	3	84.699	891.481	KQVCGSSKLELAQYRE	KLELAQYREVAALAQF	395	401	yes	no	2	0.019871		K	L	E	Y	R	E	1	1	0	0	0	1	1	0	0	0	2	0	0	0	0	0	0	0	1	0	0	0	569470000	11480000	14123000	10355000	93851000	93878000
B6VJY3	tr|B6VJY3|B6VJY3_VITVI	PAINVGLSVSR	11	2	66.267	1111.63	ELFYRGIRPAINVGLS	NVGLSVSRVGSAAQLK	366	376	yes	no	2	0.0040936		R	P	A	S	R	V	1	1	1	0	0	0	0	1	0	1	1	0	0	0	1	2	0	0	0	2	0	0	10716000	0	0	0	2591900	8124000
B6VJY3	tr|B6VJY3|B6VJY3_VITVI	QPQYAPLPIEK	11	24	99.589	1282.69	ARLTEVSKQPQYAPLP	YAPLPIEKQILVIYAA	433	443	yes	no	2	0.00016718		K	Q	P	E	K	Q	1	0	0	0	0	2	1	0	0	1	1	1	0	0	3	0	0	0	1	0	0	0	274770000	6079400	8117500	5620700	46276000	32843000
B6VJY3	tr|B6VJY3|B6VJY3_VITVI	RTGSIVDVPAGK	12	13	71.176	1198.67	IKEGDLVKRTGSIVDV	IVDVPAGKAMLGRVVD	92	103	yes	no	2;3	0.00020038		K	R	T	G	K	A	1	1	0	1	0	0	0	2	0	1	0	1	0	0	1	1	1	0	0	2	0	1	66384000	0	0	0	9373500	16338000
B6VJY3	tr|B6VJY3|B6VJY3_VITVI	TAIAIDTILNQK	12	17	186.46	1299.74	IGDRQTGKTAIAIDTI	IDTILNQKLLNSKATS	178	189	yes	no	2	6.5852e-63		K	T	A	Q	K	L	2	0	1	1	0	1	0	0	0	3	1	1	0	0	0	0	2	0	0	0	0	0	478890000	0	0	0	87284000	0
B6VJY3	tr|B6VJY3|B6VJY3_VITVI	TGSIVDVPAGK	11	23	101.5	1042.57	KEGDLVKRTGSIVDVP	IVDVPAGKAMLGRVVD	93	103	yes	no	2	2.8158e-07		R	T	G	G	K	A	1	0	0	1	0	0	0	2	0	1	0	1	0	0	1	1	1	0	0	2	0	0	987350000	24207000	31779000	15052000	122310000	89226000
B6VJY3	tr|B6VJY3|B6VJY3_VITVI	VVDALGVPIDGR	12	33	96.82	1209.67	AGKAMLGRVVDALGVP	LGVPIDGRGALSDHER	109	120	yes	no	2	5.4922e-05		R	V	V	G	R	G	1	1	0	2	0	0	0	2	0	1	1	0	0	0	1	0	0	0	0	3	0	0	1251600000	45379000	39885000	36336000	67268000	62117000
B6VJY3	tr|B6VJY3|B6VJY3_VITVI	VVSVGDGIAR	10	18	123.75	971.54	LKVDEIGRVVSVGDGI	SVGDGIARVYGLNEIQ	33	42	yes	no	2	3.6855e-07		R	V	V	A	R	V	1	1	0	1	0	0	0	2	0	1	0	0	0	0	0	1	0	0	0	3	0	0	600100000	22767000	40929000	25265000	136600000	119130000
B6VJY3	tr|B6VJY3|B6VJY3_VITVI	ELIIGDR	7	29	130.04	814.455	VPIGRGQRELIIGDRQ	RELIIGDRQTGKTAIA	167	173	no	no	2	0.0084627		R	E	L	D	R	Q	0	1	0	1	0	0	1	1	0	2	1	0	0	0	0	0	0	0	0	0	0	0	2743100000	0	69168000	56131000	331390000	350020000
B6VJY3	tr|B6VJY3|B6VJY3_VITVI	ELIIGDRQTGK	11	8	73.346	1228.68	VPIGRGQRELIIGDRQ	IGDRQTGKTAIAIDTI	167	177	no	no	2;3	0.020599		R	E	L	G	K	T	0	1	0	1	0	1	1	2	0	2	1	1	0	0	0	0	1	0	0	0	0	1	66620000	0	2367100	2277400	9039000	5303700
B6VJY3	tr|B6VJY3|B6VJY3_VITVI	QMSLLLR	7	51	149.48	859.495	SKQAVAYRQMSLLLRR	RQMSLLLRRPPGREAF	283	289	no	no	2	0.00017588	97	R	Q	M	L	R	R	0	1	0	0	0	1	0	0	0	0	3	0	1	0	0	1	0	0	0	0	0	0	2083600000	32061000	34574000	45511000	420470000	301600000
B6VJZ7	tr|B6VJZ7|B6VJZ7_VITVI	YAHIGDVIVAVIK	13	1	30.023	1396.81	IIGTSNRRYAHIGDVI	DVIVAVIKEVVPNMPL	32	44	yes	no	3	0.032214		R	Y	A	I	K	E	2	0	0	1	0	0	0	1	1	3	0	1	0	0	0	0	0	0	1	3	0	0	4927700	0	0	0	4044700	0
B6VJZ7	tr|B6VJZ7|B6VJZ7_VITVI	YDDNAAVIIDQEGNPK	16	4	49.595	1760.82	RDNGMIIRYDDNAAVI	IDQEGNPKGTRIFGAI	79	94	yes	no	2	0.0039415		R	Y	D	P	K	G	2	0	2	3	0	1	1	1	0	2	0	1	0	0	1	0	0	0	1	1	0	0	40256000	0	0	0	5104700	7031900
C4P7W3	tr|C4P7W3|C4P7W3_VITVI	LLHHPNIVR	9	7	84.743	1097.65	QREIRTMKLLHHPNIV	LHHPNIVRIHEVIGTK	64	72	yes	yes	3	0.00086035		K	L	L	V	R	I	0	1	1	0	0	0	0	0	2	1	2	0	0	0	1	0	0	0	0	1	0	0	18391000	0	0	564820	2139800	1194800
C4P7W7	tr|C4P7W7|C4P7W7_VITVI	ILDPNPMTR	9	1	46.819	1055.54	GAMKLITRILDPNPMT	LDPNPMTRITIPEILE	248	256	yes	yes	2	0.06684		R	I	L	T	R	I	0	1	1	1	0	0	0	0	0	1	1	0	1	0	2	0	1	0	0	0	0	0	0	0	0	0	0	0
C4P7W7	tr|C4P7W7|C4P7W7_VITVI	ITIPEILEDEWFK	13	4	71.879	1631.84	LDPNPMTRITIPEILE	ILEDEWFKKGYKPPVF	257	269	yes	yes	2	0.0012101		R	I	T	F	K	K	0	0	0	1	0	0	3	0	0	3	1	1	0	1	1	0	1	1	0	0	0	0	27558000	0	0	0	0	0
C5DB50	tr|C5DB50|C5DB50_VITVI	DVLDGSSVGFVETLENDLAK	20	17	188.04	2107.03	VHILTDGRDVLDGSSV	TLENDLAKLREKGVDA	171	190	yes	yes	2	3.445e-139		R	D	V	A	K	L	1	0	1	3	0	0	2	2	0	0	3	1	0	1	0	2	1	0	0	3	0	0	122590000	2595900	4240600	3471500	31778000	18497000
C5DB50	tr|C5DB50|C5DB50_VITVI	GWDAQVLGEAPHK	13	5	55.98	1406.69	NDWEVVKRGWDAQVLG	VLGEAPHKFRSAVEAV	224	236	yes	yes	3	0.001037		R	G	W	H	K	F	2	0	0	1	0	1	1	2	1	0	1	1	0	0	1	0	0	1	0	1	0	0	34342000	2647200	1616600	1942800	12957000	5267000
C5DB50	tr|C5DB50|C5DB50_VITVI	IDQLQLLLK	9	10	142.55	1082.67	SDGGVHSRIDQLQLLL	DQLQLLLKGASENGAK	143	151	yes	yes	2	1.2176e-07		R	I	D	L	K	G	0	0	0	1	0	2	0	0	0	1	4	1	0	0	0	0	0	0	0	0	0	0	210910000	2056200	4614500	5271400	26142000	24151000
C5DB50	tr|C5DB50|C5DB50_VITVI	IHYAGMLQYDGELK	14	3	46.318	1636.79	FDRVRFPKIHYAGMLQ	LQYDGELKLPNHYLVS	313	326	yes	yes	2;3	0.0059198		K	I	H	L	K	L	1	0	0	1	0	1	1	2	1	1	2	1	1	0	0	0	0	0	2	0	0	0	53746000	0	0	0	10309000	10986000
C5DB50	tr|C5DB50|C5DB50_VITVI	IILDAIEQVGGIYVVTADHGNAEDMVK	27	1	109.25	2869.45	KAADEAVKIILDAIEQ	GNAEDMVKRNKSGQPL	454	480	yes	yes	3	9.1778e-53		K	I	I	V	K	R	3	0	1	3	0	1	2	3	1	4	1	1	1	0	0	0	1	0	1	4	0	0	7527100	0	0	0	0	7527100
C5DB50	tr|C5DB50|C5DB50_VITVI	IYEGEGFK	8	1	54.712	941.449	DFALDSGKIYEGEGFK	IYEGEGFKYIKECFET	110	117	yes	yes	2	0.053291		K	I	Y	F	K	Y	0	0	0	0	0	0	2	2	0	1	0	1	0	1	0	0	0	0	1	0	0	0	65165000	3904200	3633400	2260700	19629000	13946000
C5DB50	tr|C5DB50|C5DB50_VITVI	LPNHYLVSPPEIER	14	46	130.72	1662.87	LQYDGELKLPNHYLVS	VSPPEIERTSGEYLVH	327	340	yes	yes	2;3	2.2486e-23		K	L	P	E	R	T	0	1	1	0	0	0	2	0	1	1	2	0	0	0	3	1	0	0	1	1	0	0	239390000	10567000	5972300	8496300	19026000	19609000
C5DB50	tr|C5DB50|C5DB50_VITVI	LVDFALDSGK	10	7	69.721	1063.56	RIYAQGAKLVDFALDS	DFALDSGKIYEGEGFK	100	109	yes	yes	2	0.0057698		K	L	V	G	K	I	1	0	0	2	0	0	0	1	0	0	2	1	0	1	0	1	0	0	0	1	0	0	138640000	4010900	4417500	0	22346000	17368000
C5DB50	tr|C5DB50|C5DB50_VITVI	SGYFDPSMEEYVEIPSDSGITFNVKPK	27	6	64.845	3035.41	TFFWNGNRSGYFDPSM	ITFNVKPKMKAVEIAE	374	400	yes	yes	3	1.7648e-16		R	S	G	P	K	M	0	0	1	2	0	0	3	2	0	2	0	2	1	2	3	4	1	0	2	2	0	1	100430000	0	0	0	13740000	14697000
C5DB50	tr|C5DB50|C5DB50_VITVI	SLEYEDFDKFDR	12	12	131.69	1562.69	DRMVMIAKSLEYEDFD	EDFDKFDRVRFPKIHY	296	307	yes	yes	2;3	1.6792e-12		K	S	L	D	R	V	0	1	0	3	0	0	2	0	0	0	1	1	0	2	0	1	0	0	1	0	0	1	148420000	0	0	4424400	30382000	23142000
C5DB50	tr|C5DB50|C5DB50_VITVI	TSGEYLVHNGVR	12	11	157.03	1330.66	VSPPEIERTSGEYLVH	YLVHNGVRTFACSETV	341	352	yes	yes	2;3	5.7464e-28		R	T	S	V	R	T	0	1	1	0	0	0	1	2	1	0	1	0	0	0	0	1	1	0	1	2	0	0	371970000	13898000	12476000	5340200	37845000	39125000
C5DB51	tr|C5DB51|C5DB51_VITVI	FNFSHGTHDYHQETLDNLR	19	10	181.4	2330.05	RAGMNVARFNFSHGTH	QETLDNLRIAMQNTQI	51	69	yes	yes	3;4	1.3111e-123		R	F	N	L	R	I	0	1	2	2	0	1	1	1	3	0	2	0	0	2	0	1	2	0	1	0	0	0	214360000	1973300	0	1582100	59024000	46903000
C5DB51	tr|C5DB51|C5DB51_VITVI	STPLPMSPLESLASSAVGTANK	22	11	72.99	2157.1	AIFKEMIRSTPLPMSP	SAVGTANKAKAKLIVV	371	392	yes	yes	2	1.6565e-10		R	S	T	N	K	A	3	0	1	0	0	0	1	1	0	0	3	1	1	0	3	5	2	0	0	1	0	0	63215000	0	1187000	0	12883000	10459000
C6EWE5	tr|C6EWE5|C6EWE5_VITVI	DNYDTEEVLK	10	1	45.939	1224.55	LWEDSIAKDNYDTEEV	YDTEEVLKKKITHVHD	181	190	yes	yes	2	0.05266		K	D	N	L	K	K	0	0	1	2	0	0	2	0	0	0	1	1	0	0	0	0	1	0	1	1	0	0	40356000	0	0	0	3801600	0
C6EWE5	tr|C6EWE5|C6EWE5_VITVI	GPTIQLGR	8	2	95.531	840.482	TTTGNANRGPTIQLGR	GPTIQLGRVVRSENAK	454	461	yes	yes	2	0.0071651		R	G	P	G	R	V	0	1	0	0	0	1	0	2	0	1	1	0	0	0	1	0	1	0	0	0	0	0	113570000	0	0	0	18725000	15595000
C6EWE5	tr|C6EWE5|C6EWE5_VITVI	SDYLTLR	7	5	85.813	866.45	QFYASVTKSDYLTLRL	KSDYLTLRLGFIMMHC	233	239	no	no	2	0.019323		K	S	D	L	R	L	0	1	0	1	0	0	0	0	0	0	2	0	0	0	0	1	1	0	1	0	0	0	97585000	0	0	0	8966700	8820500
D0VBC1	tr|D0VBC1|D0VBC1_VITVI	AFATGGYAAMQR	12	3	81.525	1242.58	VGTLNLLRAFATGGYA	GGYAAMQRVSQWNLDF	216	227	no	no	2	6.9314e-05	283	R	A	F	Q	R	V	4	1	0	0	0	1	0	2	0	0	0	0	1	1	0	0	1	0	1	0	0	0	42263000	1549400	0	0	7999000	10638000
D0VBC1	tr|D0VBC1|D0VBC1_VITVI	AYLQSVGTLNLLR	13	2	66.989	1446.82	PDPQRLIRAYLQSVGT	VGTLNLLRAFATGGYA	203	215	yes	yes	2	0.0016167		R	A	Y	L	R	A	1	1	1	0	0	1	0	1	0	0	4	0	0	0	0	1	1	0	1	1	0	0	28876000	779810	962370	0	6268000	4000700
D6CH20	tr|D6CH20|D6CH20_VITVI	DAPNPQNPPPVETK	14	7	112.62	1502.74	PPAGYPMKDAPNPQNP	NPPPVETKSRGEGFWK	37	50	yes	yes	2	1.1063e-11		K	D	A	T	K	S	1	0	2	1	0	1	1	0	0	0	0	1	0	0	5	0	1	0	0	1	0	0	74093000	0	1069000	0	5645600	6043400
D7FBA7	tr|D7FBA7|D7FBA7_VITVI	HIDFSLTSPLGGGR	14	10	101.43	1455.75	LVRMDSQKHIDFSLTS	TSPLGGGRPGRVKRKN	157	170	yes	yes	2;3	1.0655e-08		K	H	I	G	R	P	0	1	0	1	0	0	0	3	1	1	2	0	0	1	1	2	1	0	0	0	0	0	93007000	2192500	1099500	0	0	9028100
D7FBA7	tr|D7FBA7|D7FBA7_VITVI	HIDFSLTSPLGGGRPGR	17	2	69.485	1765.92	LVRMDSQKHIDFSLTS	LGGGRPGRVKRKNQKA	157	173	yes	yes	3;4	4.8688e-05		K	H	I	G	R	V	0	2	0	1	0	0	0	4	1	1	2	0	0	1	2	2	1	0	0	0	0	1	15382000	546420	0	1915400	0	0
D7FBA7	tr|D7FBA7|D7FBA7_VITVI	QVVNIPSFLVR	11	58	141.89	1270.74	QRHIRVGRQVVNIPSF	NIPSFLVRMDSQKHID	141	151	yes	yes	2	7.3786e-16		R	Q	V	V	R	M	0	1	1	0	0	1	0	0	0	1	1	0	0	1	1	1	0	0	0	3	0	0	1008900000	7831400	21567000	11704000	125960000	16433000
D7FBC0	tr|D7FBC0|D7FBC0_VITVI	GLVGDDAWLNGEFITTVQQR	20	22	170.89	2218.1	PAGEKPVRGLVGDDAW	FITTVQQRGAAIIKAR	212	231	yes	no	2;3	9.8599e-109		R	G	L	Q	R	G	1	1	1	2	0	2	1	3	0	1	2	0	0	1	0	0	2	1	0	2	0	0	338380000	11886000	9372300	3655600	60894000	76544000
D7FBC0	tr|D7FBC0|D7FBC0_VITVI	GVMLGADQPVILHMLDIPPAAEALNGVK	28	2	58.47	2868.52	ALVPMIARGVMLGADQ	AEALNGVKMELVDAAF	28	55	yes	no	3	3.1101e-12		R	G	V	V	K	M	4	0	1	2	0	1	1	3	1	2	4	1	2	0	3	0	0	0	0	3	0	0	34304000	0	0	0	16045000	0
D7FBC0	tr|D7FBC0|D7FBC0_VITVI	IVQGLHIDEFSR	12	16	116.13	1412.74	TCCAGEWKIVQGLHID	LHIDEFSRKKLDLTAQ	299	310	yes	no	2;3	5.0424e-09		K	I	V	S	R	K	0	1	0	1	0	1	1	1	1	2	1	0	0	1	0	1	0	0	0	1	0	0	279660000	16619000	17105000	10060000	39428000	29921000
D7FBC0	tr|D7FBC0|D7FBC0_VITVI	KLDLTAQELSEEK	13	1	45.614	1502.78	HIDEFSRKKLDLTAQE	AQELSEEKELAYSCLS	312	324	yes	no	2	0.0070065		K	K	L	E	K	E	1	0	0	1	0	1	3	0	0	0	3	2	0	0	0	1	1	0	0	0	0	1	0	0	0	0	0	0
D7FBC0	tr|D7FBC0|D7FBC0_VITVI	LDLTAQELSEEK	12	3	98.942	1374.69	IDEFSRKKLDLTAQEL	AQELSEEKELAYSCLS	313	324	yes	no	2	3.5508e-05		K	L	D	E	K	E	1	0	0	1	0	1	3	0	0	0	3	1	0	0	0	1	1	0	0	0	0	0	30565000	0	0	0	13811000	3880600
D7FBC0	tr|D7FBC0|D7FBC0_VITVI	LNVQVSDVK	9	10	110.53	1000.56	ALGQVSERLNVQVSDV	NVQVSDVKNVIIWGNH	172	180	yes	no	2	4.242e-05		R	L	N	V	K	N	0	0	1	1	0	1	0	0	0	0	1	1	0	0	0	1	0	0	0	3	0	0	1149000000	39291000	33716000	22274000	251670000	246580000
D7FBC0	tr|D7FBC0|D7FBC0_VITVI	MELVDAAFPLLK	12	47	132.56	1345.73	AEALNGVKMELVDAAF	DAAFPLLKGVVATTDV	56	67	yes	no	2	2.9359e-14	285	K	M	E	L	K	G	2	0	0	1	0	0	1	0	0	0	3	1	1	1	1	0	0	0	0	1	0	0	398230000	22212000	13882000	8690800	102150000	58071000
D7FBC0	tr|D7FBC0|D7FBC0_VITVI	NVIIWGNHSSTQYPDVNHATVK	22	4	127.35	2479.22	NVQVSDVKNVIIWGNH	DVNHATVKTPAGEKPV	181	202	yes	no	3;4	4.1493e-54		K	N	V	V	K	T	1	0	3	1	0	1	0	1	2	2	0	1	0	0	1	2	2	1	1	3	0	0	153750000	3280900	5566000	0	40275000	23327000
D7FBC0	tr|D7FBC0|D7FBC0_VITVI	VLVTGAAGQIGYALVPMIAR	20	44	148.52	1999.13	________________	ALVPMIARGVMLGADQ	8	27	yes	no	2;3	3.4215e-69	286	R	V	L	A	R	G	4	1	0	0	0	1	0	3	0	2	2	0	1	0	1	0	1	0	1	3	0	0	395750000	11262000	9793800	8264800	126210000	81814000
D7FBC0	tr|D7FBC0|D7FBC0_VITVI	VLVVANPANTNALILK	16	13	148.7	1648.99	NHAAANCKVLVVANPA	NTNALILKEFAPSIPE	127	142	yes	no	2	1.0264e-47		K	V	L	L	K	E	3	0	3	0	0	0	0	0	0	1	3	1	0	0	1	0	1	0	0	3	0	0	131860000	1431800	3748100	3625100	34709000	15279000
D7FBC0	tr|D7FBC0|D7FBC0_VITVI	EFAPSIPEK	9	6	64.927	1016.52	NTNALILKEFAPSIPE	FAPSIPEKNISCLTRL	143	151	yes	no	2	0.010225		K	E	F	E	K	N	1	0	0	0	0	0	2	0	0	1	0	1	0	1	2	1	0	0	0	0	0	0	162270000	1734700	4127500	2384000	31483000	24433000
D7SGV2	tr|D7SGV2|D7SGV2_VITVI	AMIDATASESTLEEETGVR	19	2	110.74	2008.93	CMSFCSLKAMIDATAS	LEEETGVRMVALFDHE	283	301	yes	yes	2	7.1674e-26		K	A	M	V	R	M	3	1	0	1	0	0	4	1	0	1	1	0	1	0	0	2	3	0	0	1	0	0	20971000	0	0	0	5176800	4375400
D7SGV2	tr|D7SGV2|D7SGV2_VITVI	DNWNLEAGKR	10	6	73.632	1201.58	GFVQVSERDNWNLEAG	WNLEAGKRYFFTRNYS	50	59	yes	yes	2;3	0.0089177		R	D	N	K	R	Y	1	1	2	1	0	0	1	1	0	0	1	1	0	0	0	0	0	1	0	0	0	1	80448000	1914900	4616800	0	3851600	9070600
D7SGV2	tr|D7SGV2|D7SGV2_VITVI	HNLPVQDFVVR	11	2	62.694	1322.71	IFKEIAAKHNLPVQDF	PVQDFVVRNDMPCGST	407	417	yes	yes	2	0.012841		K	H	N	V	R	N	0	1	1	1	0	1	0	0	1	0	1	0	0	1	1	0	0	0	0	3	0	0	15202000	0	0	0	15202000	0
D7SGV2	tr|D7SGV2|D7SGV2_VITVI	IEEPIMR	7	4	105.39	886.458	AFSHKLVRIEEPIMRI	RIEEPIMRIPNLAIHL	152	158	yes	yes	2	0.014892	287	R	I	E	M	R	I	0	1	0	0	0	0	2	0	0	2	0	0	1	0	1	0	0	0	0	0	0	0	165900000	2472200	3094900	0	43143000	28880000
D7SGV2	tr|D7SGV2|D7SGV2_VITVI	IPNLAIHLDR	10	42	117.52	1160.67	RIEEPIMRIPNLAIHL	NLAIHLDRGVNDGFKV	159	168	yes	yes	2;3	2.0109e-07		R	I	P	D	R	G	1	1	1	1	0	0	0	0	1	2	2	0	0	0	1	0	0	0	0	0	0	0	354620000	3399100	3638800	2053000	47850000	43190000
D7SGV2	tr|D7SGV2|D7SGV2_VITVI	NYSTIVAFAIGK	12	6	66.326	1282.69	GKRYFFTRNYSTIVAF	IVAFAIGKKYVPGNGF	65	76	yes	yes	2	0.0018332		R	N	Y	G	K	K	2	0	1	0	0	0	0	1	0	2	0	1	0	1	0	1	1	0	1	1	0	0	60306000	0	0	0	6410700	2008400
D7SGV2	tr|D7SGV2|D7SGV2_VITVI	TVDVGAPQLSMHSIR	15	1	58.814	1609.82	LASGVGIRTVDVGAPQ	QLSMHSIREMSAVDDV	438	452	yes	yes	3	0.00080995	288	R	T	V	I	R	E	1	1	0	1	0	1	0	1	1	1	1	0	1	0	1	2	1	0	0	2	0	0	26304000	0	0	0	5543600	1699700
D7SGV2	tr|D7SGV2|D7SGV2_VITVI	YATNAVTSFIFK	12	2	50.897	1360.7	IKHNANQRYATNAVTS	AVTSFIFKEIAAKHNL	390	401	yes	yes	2	0.013538		R	Y	A	F	K	E	2	0	1	0	0	0	0	0	0	1	0	1	0	2	0	1	2	0	1	1	0	0	16838000	0	0	0	7075300	0
D7SGV3	tr|D7SGV3|D7SGV3_VITVI	GELVSDDLVVGIIDEAIK	18	1	120.9	1884.01	KAKEAMEKGELVSDDL	GIIDEAIKKPSCQKGF	87	104	yes	yes	2	1.7357e-41		K	G	E	I	K	K	1	0	0	3	0	0	2	2	0	3	2	1	0	0	0	1	0	0	0	3	0	0	39137000	0	0	0	3445300	3295200
D7SGV3	tr|D7SGV3|D7SGV3_VITVI	LILIGPPGSGK	11	10	66.486	1050.64	CSTKPDKRLILIGPPG	IGPPGSGKGTQSPIIK	34	44	yes	yes	2	0.0040276		R	L	I	G	K	G	0	0	0	0	0	0	0	3	0	2	2	1	0	0	2	1	0	0	0	0	0	0	103170000	3021100	1794000	1041500	14550000	10942000
D7SGV3	tr|D7SGV3|D7SGV3_VITVI	VHGIDDVTGEPLIQR	15	2	66.387	1647.86	HTKFAPPKVHGIDDVT	TGEPLIQRKDDTAAVL	177	191	yes	yes	2;3	0.00099068		K	V	H	Q	R	K	0	1	0	2	0	1	1	2	1	2	1	0	0	0	1	0	1	0	0	2	0	0	21216000	0	0	0	4443800	5019900
D7SGV3	tr|D7SGV3|D7SGV3_VITVI	GFILDGFPR	9	7	76.679	1020.54	IKKPSCQKGFILDGFP	FILDGFPRTEVQAQKL	111	119	yes	no	2	0.0054945		K	G	F	P	R	T	0	1	0	1	0	0	0	2	0	1	1	0	0	2	1	0	0	0	0	0	0	0	13952000	0	0	0	7852700	0
D7SGW9	tr|D7SGW9|D7SGW9_VITVI	AATYLTGEIR	10	2	62.466	1093.58	QAFLYGERAATYLTGE	TYLTGEIRNELLRGAA	635	644	yes	yes	2	0.011234		R	A	A	I	R	N	2	1	0	0	0	0	1	1	0	1	1	0	0	0	0	0	2	0	1	0	0	0	18928000	0	0	0	13090000	5838600
D7SGW9	tr|D7SGW9|D7SGW9_VITVI	LSLQLLSR	8	2	74.376	928.571	SCSERFLRLSLQLLSR	LSLQLLSRYSNWLSSG	482	489	yes	yes	2	0.0098045		R	L	S	S	R	Y	0	1	0	0	0	1	0	0	0	0	4	0	0	0	0	2	0	0	0	0	0	0	6075000	0	0	0	0	0
D7SGW9	tr|D7SGW9|D7SGW9_VITVI	YSNWLSSGLAALK	13	1	43.548	1408.74	LSLQLLSRYSNWLSSG	SSGLAALKTGNAGRNP	490	502	yes	yes	2	0.027936		R	Y	S	L	K	T	2	0	1	0	0	0	0	1	0	0	3	1	0	0	0	3	0	1	1	0	0	0	9978000	0	0	0	0	0
D7SGX1	tr|D7SGX1|D7SGX1_VITVI	APSSEYVNVSR	11	19	124.12	1207.58	TVHAALSKAPSSEYVN	SEYVNVSRWYNHIESL	46	56	yes	yes	2	8.216e-11		K	A	P	S	R	W	1	1	1	0	0	0	1	0	0	0	0	0	0	0	1	3	0	0	1	2	0	0	164100000	5680800	5884700	4144600	27420000	25780000
D7SGX1	tr|D7SGX1|D7SGX1_VITVI	AVTFYGVNSGSGLK	14	2	54.402	1398.71	________________	VNSGSGLKKLDEYLLT	2	15	yes	yes	2	0.0011314		M	A	V	L	K	K	1	0	1	0	0	0	0	3	0	0	1	1	0	1	0	2	1	0	1	2	0	0	18467000	0	2727000	2129400	7946300	2950700
D7SGX3	tr|D7SGX3|D7SGX3_VITVI	QAIPFQR	7	5	88.643	858.471	LEDVLAHKQAIPFQRF	KQAIPFQRFCRGVGRT	82	88	yes	yes	2	0.0018436		K	Q	A	Q	R	F	1	1	0	0	0	2	0	0	0	1	0	0	0	1	1	0	0	0	0	0	0	0	106840000	0	0	0	0	0
D7SGX3	tr|D7SGX3|D7SGX3_VITVI	YLEDVLAHK	9	27	108.15	1086.57	LRLTKAKRYLEDVLAH	LEDVLAHKQAIPFQRF	73	81	yes	yes	2;3	0.00040604		R	Y	L	H	K	Q	1	0	0	1	0	0	1	0	1	0	2	1	0	0	0	0	0	0	1	1	0	0	281640000	2097100	0	0	0	15649000
D7SH03	tr|D7SH03|D7SH03_VITVI	SLTDVITSILQR	12	1	78.324	1344.76	HRFTCDTRSLTDVITS	VITSILQRVGDDIDRN	427	438	yes	yes	2	0.0016063		R	S	L	Q	R	V	0	1	0	1	0	1	0	0	0	2	2	0	0	0	0	2	2	0	0	1	0	0	0	0	0	0	0	0
D7SH08	tr|D7SH08|D7SH08_VITVI	SVYANLYGR	9	1	35.322	1041.52	LIVVHRTKSVYANLYG	VYANLYGRSQA_____	577	585	yes	yes	2	0.066445		K	S	V	G	R	S	1	1	1	0	0	0	0	1	0	0	1	0	0	0	0	1	0	0	2	1	0	0	23426000	0	1419300	0	0	2392300
D7SH08	tr|D7SH08|D7SH08_VITVI	VGGGYFSESIVR	12	14	86.911	1269.64	SIWNFLGRVGGGYFSE	YFSESIVRNFAFPRPV	412	423	yes	yes	2	0.00016223		R	V	G	V	R	N	0	1	0	0	0	0	1	3	0	1	0	0	0	1	0	2	0	0	1	2	0	0	131400000	1733600	1814500	1675100	0	0
D7SH08	tr|D7SVN8|D7SVN8_VITVI	RGEDFTLMQALIK	13	4	79.089	1520.8	VKRKRGPRRGEDFTLM	TLMQALIKADFWLIFV	348	360	no	no	3	0.00012095		R	R	G	I	K	A	1	1	0	1	0	1	1	1	0	1	2	1	1	1	0	0	1	0	0	0	0	1	15483000	0	0	0	4376800	0
D7SH08	tr|D7SVN8|D7SVN8_VITVI	GPVVGILK	8	22	73.324	781.506	VQNFPKNRGPVVGILK	GPVVGILKGFAGLSGA	144	151	no	no	2	0.010256		R	G	P	L	K	G	0	0	0	0	0	0	0	2	0	1	1	1	0	0	1	0	0	0	0	2	0	0	237670000	0	1090700	0	31348000	14846000
D7SH08	tr|D7SVN8|D7SVN8_VITVI	LFQAAAEGAVR	11	11	84.479	1131.6	RIAHLQAKLFQAAAEG	AAAEGAVRVKRKRGPR	329	339	no	no	2	0.00055663		K	L	F	V	R	V	4	1	0	0	0	1	1	1	0	0	1	0	0	1	0	0	0	0	0	1	0	0	128960000	0	0	0	24945000	26702000
D7SH54	tr|D7SH54|D7SH54_VITVI	QLAEAGAHVVMAVR	14	5	89.663	1450.77	GIGLQIARQLAEAGAH	AHVVMAVRNSKAANDL	70	83	yes	yes	2;3	6.522e-05	289	R	Q	L	V	R	N	4	1	0	0	0	1	1	1	1	0	1	0	1	0	0	0	0	0	0	3	0	0	46206000	0	0	0	4868800	9662000
D7SH57	tr|D7SH57|D7SH57_VITVI	EIDGYDAVIR	10	15	88.364	1149.57	LLKTRFGKEIDGYDAV	DGYDAVIRENGAPIEN	192	201	yes	yes	2	0.0012871		K	E	I	I	R	E	1	1	0	2	0	0	1	1	0	2	0	0	0	0	0	0	0	0	1	1	0	0	1620000000	132470000	224110000	145940000	143690000	148260000
D7SH72	tr|D7SH72|D7SH72_VITVI	SLEVIWQGSR	10	1	44.847	1173.61	RAKRKDEKSLEVIWQG	EVIWQGSRTFGSSSQI	209	218	yes	yes	2	0.060944		K	S	L	S	R	T	0	1	0	0	0	1	1	1	0	1	1	0	0	0	0	2	0	1	0	1	0	0	23651000	0	0	0	9960200	7973700
D7SH72	tr|D7SH72|D7SH72_VITVI	WWGDQSEIIQGLVR	14	1	43.761	1685.85	VEQAFFQRWWGDQSEI	EIIQGLVRKFISSGQL	103	116	yes	yes	2	0.0094005		R	W	W	V	R	K	0	1	0	1	0	2	1	2	0	2	1	0	0	0	0	1	0	2	0	1	0	0	0	0	0	0	0	0
D7SH72	tr|D7SH72|D7SH72_VITVI	INAYWTGYFTSR	12	2	36.292	1477.7	DYFPYADRINAYWTGY	WTGYFTSRAGLKGYVR	355	366	yes	no	2	0.014356		R	I	N	S	R	A	1	1	1	0	0	0	0	1	0	1	0	0	0	1	0	1	2	1	2	0	0	0	11462000	0	0	0	3819400	1172500
D7SH72	tr|D7SH72|D7SH72_VITVI	LNVHLVPHSHDDVGWLK	17	1	41.367	1965.02	SHGVVPGKLNVHLVPH	HDDVGWLKTIDQYYVG	39	55	yes	no	3	0.0011735		K	L	N	L	K	T	0	0	1	2	0	0	0	1	3	0	3	1	0	0	1	1	0	1	0	3	0	0	0	0	0	0	0	0
D7SH78	tr|D7SH78|D7SH78_VITVI	DGALEELGR	9	0	54.066	958.472	AVVYTKSKDGALEELG	GALEELGRTEVVLNSL	75	83	yes	yes	2	0.066748		K	D	G	G	R	T	1	1	0	1	0	0	2	2	0	0	2	0	0	0	0	0	0	0	0	0	0	0	17156000	0	0	0	0	0
D7SH78	tr|D7SH78|D7SH78_VITVI	DIVQFVPFR	9	5	82.287	1119.61	SNGRVASRDIVQFVPF	IVQFVPFRDVHSGEIS	534	542	yes	yes	2	0.0045481		R	D	I	F	R	D	0	1	0	1	0	1	0	0	0	1	0	0	0	2	1	0	0	0	0	2	0	0	9280200	0	0	0	3822100	0
D7SH78	tr|D7SH78|D7SH78_VITVI	LPDSLHYIDPSGRPNAYQR	19	1	38.377	2198.09	TASNGNPRLPDSLHYI	GRPNAYQRAILEVGEV	356	374	yes	yes	3	0.0034229		R	L	P	Q	R	A	1	2	1	2	0	1	0	1	1	1	2	0	0	0	3	2	0	0	2	0	0	1	11398000	0	0	0	6327200	0
D7SH78	tr|D7SH78|D7SH78_VITVI	SDPMAVVYTK	10	1	44.543	1109.54	RDRDVLSKSDPMAVVY	PMAVVYTKSKDGALEE	63	72	yes	yes	2	0.016643	290	K	S	D	T	K	S	1	0	0	1	0	0	0	0	0	0	0	1	1	0	1	1	1	0	1	2	0	0	21671000	0	0	0	0	0
D7SH78	tr|D7SH78|D7SH78_VITVI	SLTLDLVHR	9	3	82.287	1052.6	EIVSKSNRSLTLDLVH	LTLDLVHREESIKSTR	155	163	yes	yes	2	0.0045481		R	S	L	H	R	E	0	1	0	1	0	0	0	0	1	0	3	0	0	0	0	1	1	0	0	1	0	0	13715000	0	0	0	0	0
D7SH78	tr|D7SH78|D7SH78_VITVI	SQNLGELTVHAEELSSSK	18	1	49.773	1927.95	EESIKSTRSQNLGELT	AEELSSSKIAMEIIFR	172	189	yes	yes	3	1.7874e-05		R	S	Q	S	K	I	1	0	1	0	0	1	3	1	1	0	3	1	0	0	0	4	1	0	0	1	0	0	27553000	0	0	0	0	3483400
D7SH78	tr|D7SH78|D7SH78_VITVI	VYDVDTQFHNVDVK	14	9	81.632	1677.8	VVQTLVFRVYDVDTQF	QFHNVDVKMLKLDEQQ	115	128	yes	yes	2;3	8.3342e-05		R	V	Y	V	K	M	0	0	1	3	0	1	0	0	1	0	0	1	0	1	0	0	1	0	1	4	0	0	130390000	0	1441600	0	16787000	11624000
D7SH83	tr|D7SH83|D7SH83_VITVI	DAIDAAVQELNALK	14	1	76.01	1469.77	LKASGAPKDAIDAAVQ	VQELNALKLEKASIEK	34	47	yes	yes	2	0.00083876		K	D	A	L	K	L	4	0	1	2	0	1	1	0	0	1	2	1	0	0	0	0	0	0	0	1	0	0	8615500	0	0	0	4450100	4165400
D7SH83	tr|D7SH83|D7SH83_VITVI	FPPLVAPIK	9	1	48.794	980.606	DEQLNVFRFPPLVAPI	PPLVAPIKCTVFPLVQ	567	575	yes	yes	2	0.056947		R	F	P	I	K	C	1	0	0	0	0	0	0	0	0	1	1	1	0	1	3	0	0	0	0	1	0	0	0	0	0	0	0	0
D7SH83	tr|D7SH83|D7SH83_VITVI	FSEVANLEFLMFPR	14	4	103.83	1698.84	PDDKSHPKFSEVANLE	LEFLMFPRGEQVSGQS	320	333	yes	yes	2	1.719e-08	291	K	F	S	P	R	G	1	1	1	0	0	0	2	0	0	0	2	0	1	3	1	1	0	0	0	1	0	0	31274000	0	0	0	19440000	0
D7SH83	tr|D7SH83|D7SH83_VITVI	GIVNNETLGYFIGR	14	7	127.02	1551.8	VLGEAVSKGIVNNETL	TLGYFIGRVYLFLTGL	354	367	yes	yes	2	4.3347e-23		K	G	I	G	R	V	0	1	2	0	0	0	1	3	0	2	1	0	0	1	0	0	1	0	1	1	0	0	139200000	1040500	970100	728210	19890000	14449000
D7SH83	tr|D7SH83|D7SH83_VITVI	QALVNTLER	9	8	98.048	1042.58	ALSRDAFRQALVNTLE	ALVNTLERRLFYIPSF	76	84	yes	yes	2	0.00033415		R	Q	A	E	R	R	1	1	1	0	0	1	1	0	0	0	2	0	0	0	0	0	1	0	0	1	0	0	153260000	0	0	2951200	27610000	27042000
D7SH83	tr|D7SH83|D7SH83_VITVI	SNVLAFWR	8	12	91.069	991.524	GPPGCAVKSNVLAFWR	SNVLAFWRQHFVLEEN	113	120	yes	yes	2	0.006426		K	S	N	W	R	Q	1	1	1	0	0	0	0	0	0	0	1	0	0	1	0	1	0	1	0	1	0	0	32850000	0	0	0	6130300	0
D7SH83	tr|D7SH83|D7SH83_VITVI	TVLGEAVSK	9	5	66.056	902.507	VSGQSAKRTVLGEAVS	VLGEAVSKGIVNNETL	345	353	yes	yes	2	0.0096706		R	T	V	S	K	G	1	0	0	0	0	0	1	1	0	0	1	1	0	0	0	1	1	0	0	2	0	0	183190000	2291200	2104000	3102600	9920300	12947000
D7SH83	tr|D7SH83|D7SH83_VITVI	VYLFLTGLGIDK	12	5	61.532	1337.76	TLGYFIGRVYLFLTGL	LTGLGIDKERLRFRQH	368	379	yes	yes	2	0.003864		R	V	Y	D	K	E	0	0	0	1	0	0	0	2	0	1	3	1	0	1	0	0	1	0	1	1	0	0	30746000	0	0	0	5229400	6358400
D7SH83	tr|D7SH83|D7SH83_VITVI	VYLFLTGLGIDKER	14	3	74.789	1622.9	TLGYFIGRVYLFLTGL	GLGIDKERLRFRQHLA	368	381	yes	yes	3	0.00047768		R	V	Y	E	R	L	0	1	0	1	0	0	1	2	0	1	3	1	0	1	0	0	1	0	1	1	0	1	25647000	0	0	0	6448500	0
D7SH83	tr|D7SH83|D7SH83_VITVI	LFYIPSFK	8	3	69.598	1013.56	LVNTLERRLFYIPSFK	LFYIPSFKIYRGVAGL	86	93	yes	no	2	0.014688		R	L	F	F	K	I	0	0	0	0	0	0	0	0	0	1	1	1	0	2	1	1	0	0	1	0	0	0	11761000	0	0	0	5387700	0
D7SH83	tr|D7SH83|D7SH83_VITVI	LPFAAAQIGQAFR	13	3	126.19	1388.76	LYYYNGNKLPFAAAQI	AQIGQAFRNEISPRQG	274	286	yes	no	2	3.4976e-29		K	L	P	F	R	N	4	1	0	0	0	2	0	1	0	1	1	0	0	2	1	0	0	0	0	0	0	0	39109000	571320	1839700	998350	17973000	692150
D7SH83	tr|D7SH83|D7SH83_VITVI	VFTPSVIEPSFGIGR	15	14	92.265	1604.86	EKKKEHQRVFTPSVIE	EPSFGIGRIIYCLYEH	526	540	yes	no	2	7.0888e-07		R	V	F	G	R	I	0	1	0	0	0	0	1	2	0	2	0	0	0	2	2	2	1	0	0	2	0	0	283260000	2659500	4524700	2777400	36094000	33137000
D7SHA2	tr|D7SHA2|D7SHA2_VITVI	KLIGSTNPLQAEPGTIR	17	0	21	1794	VGVVASARKLIGSTNP	QAEPGTIRGDLAVQTG	167	183	yes	yes	3	0.050005		R	K	L	I	R	G	1	1	1	0	0	1	1	2	0	2	2	1	0	0	2	1	2	0	0	0	0	1	60744000	0	0	0	10205000	6485400
D7SHA2	tr|D7SHA2|D7SHA2_VITVI	LIGSTNPLQAEPGTIR	16	8	91.355	1665.9	GVVASARKLIGSTNPL	QAEPGTIRGDLAVQTG	168	183	yes	yes	2	2.9612e-07		K	L	I	I	R	G	1	1	1	0	0	1	1	2	0	2	2	0	0	0	2	1	2	0	0	0	0	0	71908000	0	1581100	1298700	15917000	16778000
D7SHA4	tr|D7SHA4|D7SHA4_VITVI	APATPFDAIQPVLEK	15	1	35.771	1595.86	RLVTLCDRAPATPFDA	AIQPVLEKELGQSIGE	107	121	yes	yes	2	0.035024		R	A	P	E	K	E	3	0	0	1	0	1	1	0	0	1	1	1	0	1	3	0	1	0	0	1	0	0	15939000	0	0	0	6101400	2537900
D7SHA4	tr|D7SHA4|D7SHA4_VITVI	FDVDPIGSASIAQVHR	16	1	50.305	1710.87	SIGEIFERFDVDPIGS	ASIAQVHRARLRGDKN	134	149	yes	yes	2;3	0.0015651		R	F	D	H	R	A	2	1	0	2	0	1	0	1	1	2	0	0	0	1	1	2	0	0	0	2	0	0	14355000	0	0	0	5056700	3938800
D7SHA4	tr|D7SHA4|D7SHA4_VITVI	SFQFWVR	7	1	76.035	968.487	THFRPFHRSFQFWVRA	RSFQFWVRAVDIYTGY	23	29	yes	yes	2	0.023953		R	S	F	V	R	A	0	1	0	0	0	1	0	0	0	0	0	0	0	2	0	1	0	1	0	1	0	0	0	0	0	0	0	0
D7SHA5	tr|D7SHA5|D7SHA5_VITVI	IADAEENLGESEVR	14	6	85.28	1530.72	ELKKLDEKIADAEENL	NLGESEVREAHLAKSL	85	98	yes	yes	2	0.00023587		K	I	A	V	R	E	2	1	1	1	0	0	4	1	0	1	1	0	0	0	0	1	0	0	0	1	0	0	47441000	0	0	0	11520000	8206800
D7SHA5	tr|D7SHA5|D7SHA5_VITVI	NLFEEGGDWER	11	23	119.39	1350.58	SKSIDKAKNLFEEGGD	EEGGDWERKNRLKVYE	163	173	yes	yes	2	2.806e-10		K	N	L	E	R	K	0	1	1	1	0	0	3	2	0	0	1	0	0	1	0	0	0	1	0	0	0	0	538830000	0	0	0	46462000	57792000
D7SHA5	tr|D7SHA5|D7SHA5_VITVI	NLFEEGGDWERK	12	1	40.475	1478.68	SKSIDKAKNLFEEGGD	EGGDWERKNRLKVYEG	163	174	yes	yes	2;3	0.01289		K	N	L	R	K	N	0	1	1	1	0	0	3	2	0	0	1	1	0	1	0	0	0	1	0	0	0	1	11333000	0	0	0	0	0
D7SHA5	tr|D7SHA5|D7SHA5_VITVI	QGDFLLNR	8	3	57.59	961.498	ALYQATIKQGDFLLNR	QGDFLLNRIQKLSRVI	369	376	yes	yes	2	0.040468		K	Q	G	N	R	I	0	1	1	1	0	1	0	1	0	0	2	0	0	1	0	0	0	0	0	0	0	0	31221000	1271900	1123200	685290	9110600	7237200
D7SHA5	tr|D7SHA5|D7SHA5_VITVI	SFFSAFAGLAEQIK	14	26	141.65	1514.78	SLYDCQYKSFFSAFAG	AGLAEQIKLDRYLHPH	267	280	yes	yes	2;3	4.6477e-31		K	S	F	I	K	L	3	0	0	0	0	1	1	1	0	1	1	1	0	3	0	2	0	0	0	0	0	0	311120000	0	1320000	901400	36114000	21122000
D7SHA5	tr|D7SHA5|D7SHA5_VITVI	SVTIEAMAK	9	2	80.755	948.495	SQFLESYKSVTIEAMA	VTIEAMAKAFGVTVEF	310	318	yes	yes	2	0.003005		K	S	V	A	K	A	2	0	0	0	0	0	1	0	0	1	0	1	1	0	0	1	1	0	0	1	0	0	0	0	0	0	0	0
D7SHA5	tr|D7SHA5|D7SHA5_VITVI	TVVYSQFLESYK	12	12	130.69	1462.73	RYYMREVRTVVYSQFL	SQFLESYKSVTIEAMA	298	309	yes	yes	2	2.0891e-13		R	T	V	Y	K	S	0	0	0	0	0	1	1	0	0	0	1	1	0	1	0	2	1	0	2	2	0	0	548440000	7533200	9556600	5777700	59465000	28009000
D7SHA5	tr|D7SHA5|D7SHA5_VITVI	VAGVLETNRPDAK	13	24	161.87	1368.74	KLHCKIDKVAGVLETN	ETNRPDAKNALYQATI	347	359	yes	yes	2;3	1.0184e-42		K	V	A	A	K	N	2	1	1	1	0	0	1	1	0	0	1	1	0	0	1	0	1	0	0	2	0	1	307530000	4659000	4533900	2035100	63004000	41659000
D7SHA5	tr|D7SHA5|D7SHA5_VITVI	VVDAPEILAVIGK	13	20	113.99	1322.78	DRVSLKQKVVDAPEIL	EILAVIGKIPYLSEFL	237	249	yes	yes	2	6.2493e-09		K	V	V	G	K	I	2	0	0	1	0	0	1	1	0	2	1	1	0	0	1	0	0	0	0	3	0	0	702740000	5336100	3754600	4666400	61278000	41092000
D7SHD6	tr|D7SHD6|D7SHD6_VITVI	LGLPFDRPLLR	11	3	70.942	1295.77	VRRSLHSRLGLPFDRP	PFDRPLLRIANALNLS	397	407	yes	yes	3	0.0013751		R	L	G	L	R	I	0	2	0	1	0	0	0	1	0	0	4	0	0	1	2	0	0	0	0	0	0	1	16171000	0	0	0	3612900	0
D7SHJ7	tr|D7SHJ7|D7SHJ7_VITVI	HLMFWPK	7	1	54.525	957.489	KALELIDKHLMFWPKL	KHLMFWPKLLVHKTKQ	96	102	yes	no	2	0.025787	292	K	H	L	P	K	L	0	0	0	0	0	0	0	0	1	0	1	1	1	1	1	0	0	1	0	0	0	0	5351600	0	0	0	0	0
D7SHM5	tr|D7SHM5|D7SHM5_VITVI	LDQLIYIPLPDEASR	15	10	83.37	1741.93	PALLRPGRLDQLIYIP	PLPDEASRLQIFKACL	648	662	yes	yes	2	7.9651e-05		R	L	D	S	R	L	1	1	0	2	0	1	1	0	0	2	3	0	0	0	2	1	0	0	1	0	0	0	71257000	1884200	1663000	2105200	13166000	11781000
D7SHM5	tr|D7SHM5|D7SHM5_VITVI	LNEVGYDDVGGVR	13	7	54.09	1391.67	IKREDEERLNEVGYDD	YDDVGGVRKQMAQIRE	207	219	yes	yes	2	0.007027		R	L	N	V	R	K	0	1	1	2	0	0	1	3	0	0	1	0	0	0	0	0	0	0	1	3	0	0	95586000	1580600	2161100	1963000	12464000	7472200
D7SHM5	tr|D7SHM5|D7SHM5_VITVI	LVVDEAVNDDNSVVSMNPATMEK	23	1	28.299	2476.15	ERKKSPNRLVVDEAVN	MNPATMEKLQFFRGDT	36	58	yes	yes	3	0.0027031		R	L	V	E	K	L	2	0	3	3	0	0	2	0	0	0	1	1	2	0	1	2	1	0	0	5	0	0	18337000	265090	0	0	0	0
D7SHM5	tr|D7SHM5|D7SHM5_VITVI	NAPSIIFIDELDSIAPK	17	37	137.73	1841.98	KAFEEAEKNAPSIIFI	ELDSIAPKREKTHGEV	305	321	yes	yes	2;3	1.8222e-46		K	N	A	P	K	R	2	0	1	2	0	0	1	0	0	4	1	1	0	1	2	2	0	0	0	0	0	0	230460000	4315800	7761600	3346300	23703000	14901000
D7SHM5	tr|D7TQP5|D7TQP5_VITVI	DFSTAILER	9	11	70.399	1050.53	SDSKGTKRDFSTAILE	FSTAILERKKAANRLV	16	24	no	no	2	0.0075387		R	D	F	E	R	K	1	1	0	1	0	0	1	0	0	1	1	0	0	1	0	1	1	0	0	0	0	0	117920000	0	1087000	411980	8303900	6624200
D7SHM5	tr|D7TQP5|D7TQP5_VITVI	AHVIVIGATNRPNSIDPALR	20	7	78.674	2113.18	LMDGLKSRAHVIVIGA	NSIDPALRRFGRFDRE	343	362	no	no	3	1.3227e-09		R	A	H	L	R	R	3	2	2	1	0	0	0	1	1	3	1	0	0	0	2	1	1	0	0	2	0	1	119560000	3086000	7135300	4297700	0	0
D7SHM5	tr|D7TQP5|D7TQP5_VITVI	EIDIGVPDEVGR	12	20	92.781	1297.65	RRFGRFDREIDIGVPD	GVPDEVGRLEVLRIHT	370	381	no	no	2	9.1869e-05		R	E	I	G	R	L	0	1	0	2	0	0	2	2	0	2	0	0	0	0	1	0	0	0	0	2	0	0	165570000	4820500	7745700	6235000	24138000	13807000
D7SHM5	tr|D7TQP5|D7TQP5_VITVI	ELVELPLR	8	31	141.52	967.57	RKQMAQIRELVELPLR	ELVELPLRHPQLFKSI	222	229	no	no	2	4.8914e-05		R	E	L	L	R	H	0	1	0	0	0	0	2	0	0	0	3	0	0	0	1	0	0	0	0	1	0	0	238690000	6216400	11466000	6339900	25356000	20418000
D7SHM5	tr|D7TQP5|D7TQP5_VITVI	GDLFLVR	7	1	94.163	818.465	EAYRPVRKGDLFLVRG	KGDLFLVRGGMRSVEF	154	160	no	no	2	0.016342		K	G	D	V	R	G	0	1	0	1	0	0	0	1	0	0	2	0	0	1	0	0	0	0	0	1	0	0	20690000	986080	938430	0	2950900	0
D7SHM5	tr|D7TQP5|D7TQP5_VITVI	IVSQLLTLMDGLK	13	20	134.04	1429.82	THGEVERRIVSQLLTL	LTLMDGLKSRAHVIVI	328	340	no	no	2	5.5497e-29	295	R	I	V	L	K	S	0	0	0	1	0	1	0	1	0	1	4	1	1	0	0	1	1	0	0	1	0	0	233170000	2861100	5938900	2274500	18617000	10851000
D7SHM5	tr|D7TQP5|D7TQP5_VITVI	KGDLFLVR	8	1	70.929	946.56	LEAYRPVRKGDLFLVR	KGDLFLVRGGMRSVEF	153	160	no	no	2	0.032602		R	K	G	V	R	G	0	1	0	1	0	0	0	1	0	0	2	1	0	1	0	0	0	0	0	1	0	1	54941000	0	0	0	8268300	0
D7SHM5	tr|D7TQP5|D7TQP5_VITVI	TVFIIGATNRPDIIDPALLRPGR	23	2	27.127	2504.42	MDGMSAKKTVFIIGAT	PALLRPGRLDQLIYIP	620	642	no	no	4	0.0049778		K	T	V	G	R	L	2	3	1	2	0	0	0	2	0	4	2	0	0	1	3	0	2	0	0	1	0	2	1837400	0	0	0	0	0
D7SHN2	tr|D7SHN2|D7SHN2_VITVI	IAMTAPVLTSIVPGAGPLHSSAYFVR	26	3	65.428	2654.43	GANLNFSRIAMTAPVL	HSSAYFVRFYLPVKFQ	113	138	yes	yes	3	2.6953e-16	296	R	I	A	V	R	F	4	1	0	0	0	0	0	2	1	2	2	0	1	1	3	3	2	0	1	3	0	0	36772000	0	0	0	0	0
D7SHP6	tr|D7SHP6|D7SHP6_VITVI	FSFDPLEFGIPR	12	2	47.712	1423.71	VTPEKIEKFSFDPLEF	PLEFGIPRCTLDDLRG	296	307	yes	yes	2	0.017661		K	F	S	P	R	C	0	1	0	1	0	0	1	1	0	1	1	0	0	3	2	1	0	0	0	0	0	0	4808400	0	407890	0	0	0
D7SHP6	tr|D7SHP6|D7SHP6_VITVI	VNTLADGVSLAR	12	0	53.869	1214.66	AALLVSGRVNTLADGV	ADGVSLARETQESGKA	354	365	yes	yes	2	0.020082		R	V	N	A	R	E	2	1	1	1	0	0	0	1	0	0	2	0	0	0	0	1	1	0	0	2	0	0	5062700	0	0	742870	0	0
D7SHP6	tr|D7SHP6|D7SHP6_VITVI	VPFAVVGVFTEDLVLK	16	1	44.252	1731.98	GPMLNPARVPFAVVGV	FTEDLVLKMAKALQRF	238	253	yes	yes	2	0.0085462		R	V	P	L	K	M	1	0	0	1	0	0	1	1	0	0	2	1	0	2	1	0	1	0	0	5	0	0	7025000	0	0	0	0	1814200
D7SHP6	tr|D7SHP6|D7SHP6_VITVI	TVFNILGPMLNPAR	14	1	41.996	1541.84	VRKKLKVKTVFNILGP	GPMLNPARVPFAVVGV	224	237	yes	no	2	0.0064902	297	K	T	V	A	R	V	1	1	2	0	0	0	0	1	0	1	2	0	1	1	2	0	1	0	0	1	0	0	8210300	0	0	0	0	1007300
D7SHQ1	tr|D7SHQ1|D7SHQ1_VITVI	LIHLVDVPGQSHLR	14	9	106.58	1582.89	PFWKGKRRLIHLVDVP	VPGQSHLRSKLDKYLP	85	98	yes	yes	3;4	1.4567e-09		R	L	I	L	R	S	0	1	0	1	0	1	0	1	2	1	3	0	0	0	1	1	0	0	0	2	0	0	101690000	0	0	0	10286000	0
D7SHQ5	tr|D7SHQ5|D7SHQ5_VITVI	TPVSPVNSLGTGVALAGVFLYSR	23	7	63.979	2304.25	VTSVLFFRTPVSPVNS	AGVFLYSRVKRIKPKT	379	401	yes	yes	2;3	2.2636e-12		R	T	P	S	R	V	2	1	1	0	0	0	0	3	0	0	3	0	0	1	2	3	2	0	1	4	0	0	42506000	0	0	0	3329400	5387000
D7SHT5	tr|D7SHT5|D7SHT5_VITVI	KGENQTNAELVR	12	8	53.237	1357.69	LDCPLEYKKGENQTNA	QTNAELVREEDWGILL	249	260	yes	yes	2;3	0.026137		K	K	G	V	R	E	1	1	2	0	0	1	2	1	0	0	1	1	0	0	0	0	1	0	0	1	0	1	2353600000	136350000	166190000	104370000	176220000	128400000
D7SHT5	tr|D7SHT5|D7SHT5_VITVI	ALEDAIAVLDK	11	8	73.435	1156.63	VICRAYNKALEDAIAV	DAIAVLDKIAAPVDVN	127	137	yes	no	2	0.0019392		K	A	L	D	K	I	3	0	0	2	0	0	1	0	0	1	2	1	0	0	0	0	0	0	0	1	0	0	78651000	586140	3436800	0	0	6393400
D7SHT5	tr|D7SHT5|D7SHT5_VITVI	DLLNEVER	8	2	56.258	986.503	VLLRGASKDLLNEVER	DLLNEVERNLQDAMSV	382	389	yes	no	2	0.052609		K	D	L	E	R	N	0	1	1	1	0	0	2	0	0	0	2	0	0	0	0	0	0	0	0	1	0	0	0	0	0	0	0	0
D7SHU4	tr|D7SHU4|D7SHU4_VITVI	AELPLFVR	8	33	135.84	943.549	KPYEQAAKAELPLFVR	AELPLFVRLFRYYAGW	157	164	yes	yes	2	0.0001747		K	A	E	V	R	L	1	1	0	0	0	0	1	0	0	0	2	0	0	1	1	0	0	0	0	1	0	0	342440000	2355700	7542800	5553300	59536000	48181000
D7SHU4	tr|D7SHU4|D7SHU4_VITVI	AVITPLKNPAWL	12	8	90.697	1321.78	LNNYLQVKAVITPLKN	PLKNPAWL________	527	538	yes	yes	2	0.0012001		K	A	V	W	L	-	2	0	1	0	0	0	0	0	0	1	2	1	0	0	2	0	1	1	0	1	0	1	84330000	0	1653000	1143500	19099000	1054600
D7SHU4	tr|D7SHU4|D7SHU4_VITVI	DEIFGPVQSILK	12	15	72.846	1344.73	QDDMLIAKDEIFGPVQ	GPVQSILKYKDLDEVI	435	446	yes	yes	2	0.00081341		K	D	E	L	K	Y	0	0	0	1	0	1	1	1	0	2	1	1	0	1	1	1	0	0	0	1	0	0	111340000	0	946100	1065000	29760000	15615000
D7SHU4	tr|D7SHU4|D7SHU4_VITVI	GIEQGPQIDPEQFAK	15	15	191.83	1655.82	TVGDPFKKGIEQGPQI	IDPEQFAKVLRYIRSG	375	389	yes	yes	2	1.8493e-104		K	G	I	A	K	V	1	0	0	1	0	3	2	2	0	2	0	1	0	1	2	0	0	0	0	0	0	0	254930000	1449100	3519600	1369500	44445000	31291000
D7SHU4	tr|D7SHU4|D7SHU4_VITVI	GIYSLNNYLQVK	12	12	170.52	1410.75	MSGVGREKGIYSLNNY	LNNYLQVKAVITPLKN	515	526	yes	yes	2	2.6955e-43		K	G	I	V	K	A	0	0	2	0	0	1	0	1	0	1	2	1	0	0	0	1	0	0	2	1	0	0	141210000	0	4429200	0	35243000	19191000
D7SHU4	tr|D7SHU4|D7SHU4_VITVI	GYFVQPTVFSNVQDDMLIAK	20	4	89.507	2271.12	GGGRIGSKGYFVQPTV	QDDMLIAKDEIFGPVQ	415	434	yes	yes	2	4.4282e-12		K	G	Y	A	K	D	1	0	1	2	0	2	0	1	0	1	1	1	1	2	1	1	1	0	1	3	0	0	54129000	0	0	0	16449000	13957000
D7SHU4	tr|D7SHU4|D7SHU4_VITVI	IAFTGSTDTGK	11	7	114.86	1096.54	ASHMDVDKIAFTGSTD	TGSTDTGKIVQELASK	278	288	yes	yes	2	2.8887e-13		K	I	A	G	K	I	1	0	0	1	0	0	0	2	0	1	0	1	0	1	0	1	3	0	0	0	0	0	173530000	4538400	3509300	3195800	40242000	48971000
D7SHU4	tr|D7SHU4|D7SHU4_VITVI	NINTANTLTR	10	4	86.014	1116.59	LAAGVFTKNINTANTL	NTANTLTRALRVGTVW	472	481	yes	yes	2	0.001536		K	N	I	T	R	A	1	1	3	0	0	0	0	0	0	1	1	0	0	0	0	0	3	0	0	0	0	0	99336000	14606000	17380000	3539700	0	0
D7SHU4	tr|D7SHU4|D7SHU4_VITVI	TFPTFDPR	8	13	80.438	979.476	FVDAASGKTFPTFDPR	TFPTFDPRTGEVIANV	74	81	yes	yes	2	0.0065892		K	T	F	P	R	T	0	1	0	1	0	0	0	0	0	0	0	0	0	2	2	0	2	0	0	0	0	0	114280000	3684200	2988300	2206200	22419000	21450000
D7SHU4	tr|D7SHU4|D7SHU4_VITVI	TFVHESVYDEFIEK	14	22	205.27	1741.82	QCCCAGSRTFVHESVY	VYDEFIEKAKARALSR	345	358	yes	yes	2;3	3.6877e-122		R	T	F	E	K	A	0	0	0	1	0	0	3	0	1	1	0	1	0	2	0	1	1	0	1	2	0	0	521550000	0	0	0	155680000	65465000
D7SHU4	tr|D7SHU4|D7SHU4_VITVI	TGEVIANVAEGDAEDINR	18	23	212.92	1871.89	TFPTFDPRTGEVIANV	GDAEDINRAVSAARKA	82	99	yes	yes	2;3	5.6927e-157		R	T	G	N	R	A	3	1	2	2	0	0	3	2	0	2	0	0	0	0	0	0	1	0	0	2	0	0	355460000	4043100	6991400	0	67738000	81110000
D7SHU4	tr|D7SHU4|D7SHU4_VITVI	TGEVIANVAEGDAEDINRAVSAAR	24	2	35.66	2427.2	TFPTFDPRTGEVIANV	NRAVSAARKAFDEGPW	82	105	yes	yes	3	0.0016504		R	T	G	A	R	K	6	2	2	2	0	0	3	2	0	2	0	0	0	0	0	1	1	0	0	3	0	1	22968000	2179000	0	0	12065000	6391300
D7SHU4	tr|D7SHU4|D7SHU4_VITVI	YGLAAGVFTK	10	5	98.04	1025.55	IRRANSTRYGLAAGVF	LAAGVFTKNINTANTL	462	471	yes	yes	2	0.00038409		R	Y	G	T	K	N	2	0	0	0	0	0	0	2	0	0	1	1	0	1	0	0	1	0	1	1	0	0	485300000	5061300	7213500	3813700	95948000	64235000
D7SHU4	tr|D7SHU4|D7SHU4_VITVI	YKDLDEVIR	9	16	148.32	1149.6	GPVQSILKYKDLDEVI	KDLDEVIRRANSTRYG	447	455	yes	yes	2;3	4.2934e-10		K	Y	K	I	R	R	0	1	0	2	0	0	1	0	0	1	1	1	0	0	0	0	0	0	1	1	0	1	263560000	3117500	6974700	1497800	53193000	33980000
D7SHU4	tr|D7SHU4|D7SHU4_VITVI	DLDEVIR	7	3	90.706	858.445	VQSILKYKDLDEVIRR	KDLDEVIRRANSTRYG	449	455	no	no	2	0.015744		K	D	L	I	R	R	0	1	0	2	0	0	1	0	0	1	1	0	0	0	0	0	0	0	0	1	0	0	135280000	1485300	1374100	0	22589000	18415000
D7SHU4	tr|D7SHU4|D7SHU4_VITVI	AFDEGPWPR	9	1	46.819	1073.49	RAVSAARKAFDEGPWP	FDEGPWPRMSPYERSR	107	115	no	no	2	0.053112		K	A	F	P	R	M	1	1	0	1	0	0	1	1	0	0	0	0	0	1	2	0	0	1	0	0	0	0	22621000	0	0	0	9397800	0
D7SHU4	tr|D7SHU4|D7SHU4_VITVI	KAFDEGPWPR	10	1	37.717	1201.59	NRAVSAARKAFDEGPW	FDEGPWPRMSPYERSR	106	115	no	no	3	0.022166		R	K	A	P	R	M	1	1	0	1	0	0	1	1	0	0	0	1	0	1	2	0	0	1	0	0	0	1	51171000	0	0	0	16831000	12297000
D7SHU4	tr|D7SHU4|D7SHU4_VITVI	YYAGWADK	8	5	50.805	972.434	PLFVRLFRYYAGWADK	YYAGWADKIHGLTVQA	168	175	no	no	2	0.041989		R	Y	Y	D	K	I	2	0	0	1	0	0	0	1	0	0	0	1	0	0	0	0	0	1	2	0	0	0	318500000	5107000	5548600	3451100	47127000	42587000
D7SHU4	tr|D7SHU4|D7SHU4_VITVI	SNLKPVTLELGGK	13	8	83.929	1354.78	IVQELASKSNLKPVTL	VTLELGGKSPFIVCED	297	309	no	no	2;3	0.00064287		K	S	N	G	K	S	0	0	1	0	0	0	1	2	0	0	3	2	0	0	1	1	1	0	0	1	0	1	195910000	865170	4049000	3134400	39133000	19181000
D7SHW5	tr|D7SHW5|D7SHW5_VITVI	AGLIDAAPWIR	11	17	94.465	1181.66	QASCRTDRAGLIDAAP	IDAAPWIRIPYPFQWG	260	270	yes	yes	2	0.00025686		R	A	G	I	R	I	3	1	0	1	0	0	0	1	0	2	1	0	0	0	1	0	0	1	0	0	0	0	113240000	0	5778500	5024600	16642000	0
D7SHW5	tr|D7SHW5|D7SHW5_VITVI	FASATHLPSSILSR	14	4	44.925	1485.79	GAFIAVSRFASATHLP	LPSSILSRGVGWQGIG	311	324	yes	yes	3	0.0034644		R	F	A	S	R	G	2	1	0	0	0	0	0	0	1	1	2	0	0	1	1	4	1	0	0	0	0	0	44809000	2463200	3931700	1981000	4446600	0
D7SHW5	tr|D7SHW5|D7SHW5_VITVI	SEEFYSLPFNLNK	13	2	59.227	1586.76	RSFKTDTRSEEFYSLP	SLPFNLNKYFPSV___	514	526	yes	no	2	0.0052659		R	S	E	N	K	Y	0	0	2	0	0	0	2	0	0	0	2	1	0	2	1	2	0	0	1	0	0	0	11271000	1806000	1628500	1414100	5515700	0
D7SHY3	tr|D7SHY3|D7SHY3_VITVI	LLVHESIAAEFLDK	14	9	110.44	1583.86	QICSATSRLLVHESIA	IAAEFLDKLVKWTKNI	300	313	yes	yes	3	3.4023e-12		R	L	L	D	K	L	2	0	0	1	0	0	2	0	1	1	3	1	0	1	0	1	0	0	0	1	0	0	37320000	0	0	0	5294700	0
D7SHY3	tr|D7SHY3|D7SHY3_VITVI	RIPVINPATEQTIGLIPAATGEDVELAVDAAR	32	6	63.706	3299.77	WVEPITKRRIPVINPA	ELAVDAARRAFARNKG	24	55	yes	yes	3	1.5984e-18		R	R	I	A	R	R	6	2	1	2	0	1	3	2	0	4	2	0	0	0	3	0	3	0	0	3	0	1	93274000	0	0	0	7288800	5565600
D7SHY3	tr|D7SHY3|D7SHY3_VITVI	SPILVFEDVDLDK	13	0	40.941	1488.77	VSLELGGKSPILVFED	FEDVDLDKAAEWTAFG	265	277	yes	yes	2	0.048076		K	S	P	D	K	A	0	0	0	3	0	0	1	0	0	1	2	1	0	1	1	1	0	0	0	2	0	0	1795700	0	0	0	0	0
D7SHY4	tr|D7SHY4|D7SHY4_VITVI	EFALYVSSISSELR	14	9	129.77	1599.81	LVGFYEEREFALYVSS	SSISSELRVPVRYLKE	69	82	yes	yes	2	1.5601e-37		R	E	F	L	R	V	1	1	0	0	0	0	2	0	0	1	2	0	0	1	0	4	0	0	1	1	0	0	37046000	0	1779200	1544900	0	33722000
D7SHY4	tr|D7SHY4|D7SHY4_VITVI	FRPLSLNTPK	10	0	76.682	1171.67	GGPTKGTRFRPLSLNT	PLSLNTPKPLFPLAGQ	23	32	yes	yes	3	0.019952		R	F	R	P	K	P	0	1	1	0	0	0	0	0	0	0	2	1	0	1	2	1	1	0	0	0	0	1	85836000	1640500	1169100	1200600	11798000	13334000
D7SHY4	tr|D7SHY4|D7SHY4_VITVI	IGPNVSISANAR	12	1	35.657	1197.65	AKVHPTAKIGPNVSIS	VSISANARIGAGVRLI	315	326	yes	yes	2	0.061431		K	I	G	A	R	I	2	1	2	0	0	0	0	1	0	2	0	0	0	0	1	2	0	0	0	1	0	0	0	0	0	0	0	0
D7SHY4	tr|D7SHY4|D7SHY4_VITVI	IPNLAQIYLVGFYEER	16	3	68.576	1924.01	HPISGCKRIPNLAQIY	LVGFYEEREFALYVSS	53	68	yes	yes	2;3	0.00041271		R	I	P	E	R	E	1	1	1	0	0	1	2	1	0	2	2	0	0	1	1	0	0	0	2	1	0	0	67838000	0	0	0	10935000	9454600
D7SHY4	tr|D7SHY4|D7SHY4_VITVI	SATIIGNVYIHPSAK	15	7	68.576	1569.85	LASGDGTKSATIIGNV	VYIHPSAKVHPTAKIG	294	308	yes	yes	2;3	0.00086708		K	S	A	A	K	V	2	0	1	0	0	0	0	1	1	3	0	1	0	0	1	2	1	0	1	1	0	0	79054000	0	2053600	0	20106000	11347000
D7SHY4	tr|D7SHY4|D7SHY4_VITVI	YGGMGTILVIK	11	14	108.7	1150.64	EMLEAHIRYGGMGTIL	MGTILVIKVSAESASQ	138	148	yes	yes	2	1.7338e-06	299	R	Y	G	I	K	V	0	0	0	0	0	0	0	3	0	2	1	1	1	0	0	0	1	0	1	1	0	0	140340000	2223600	5314600	3901900	28280000	16955000
D7SHY4	tr|D7SHY4|D7SHY4_VITVI	LDQDILSPLAGK	12	17	125.89	1268.7	SLPKDFVRLDQDILSP	ILSPLAGKKQLYTYET	235	246	yes	no	2	6.9084e-13		R	L	D	G	K	K	1	0	0	2	0	1	0	1	0	1	3	1	0	0	1	1	0	0	0	0	0	0	104770000	2066500	4728700	5399900	27331000	18093000
D7SHY4	tr|D7SHY4|D7SHY4_VITVI	VVAVIMVGGPTK	12	14	69.03	1169.68	________________	IMVGGPTKGTRFRPLS	8	19	yes	no	2	0.0014103	298	R	V	V	T	K	G	1	0	0	0	0	0	0	2	0	1	0	1	1	0	1	0	1	0	0	4	0	0	151190000	7855600	2630100	8523200	18797000	30104000
D7SHY6	tr|D7SHY6|D7SHY6_VITVI	AAGVLENFTEGQK	13	17	113.24	1362.68	VRVSKENRAAGVLENF	ENFTEGQKYSEHFLRK	45	57	yes	yes	2	7.7012e-09		R	A	A	Q	K	Y	2	0	1	0	0	1	2	2	0	0	1	1	0	1	0	0	1	0	0	1	0	0	182080000	6518100	7861400	8242900	38655000	28130000
D7SHZ2	tr|D7SHZ2|D7SHZ2_VITVI	DFEELPSEAFRPLR	14	4	66.989	1704.85	TLRSKVQRDFEELPSE	SEAFRPLRDSLNTLLK	71	84	yes	yes	2;3	0.00071572		R	D	F	L	R	D	1	2	0	1	0	0	3	0	0	0	2	0	0	2	2	1	0	0	0	0	0	1	57412000	410700	0	0	0	2912100
D7SHZ2	tr|D7SHZ2|D7SHZ2_VITVI	DTVIIPR	7	3	69.383	812.476	GEQYQSIRDTVIIPRG	RDTVIIPRGASITRIL	839	845	yes	yes	2	0.045232		R	D	T	P	R	G	0	1	0	1	0	0	0	0	0	2	0	0	0	0	1	0	1	0	0	1	0	0	73440000	0	0	0	7002700	6972100
D7SHZ2	tr|D7SHZ2|D7SHZ2_VITVI	LETVTYALLALTR	13	11	122.64	1462.84	TGALPSSRLETVTYAL	YALLALTRAYGMKAVE	866	878	yes	yes	2	2.8793e-13		R	L	E	T	R	A	2	1	0	0	0	0	1	0	0	0	4	0	0	0	0	0	3	0	1	1	0	0	146320000	0	0	0	14299000	8818100
D7SHZ2	tr|D7SHZ2|D7SHZ2_VITVI	SSYESLVSLVSSR	13	8	120.9	1412.71	NRRLQVFRSSYESLVS	LVSLVSSRVRYPEDYQ	375	387	yes	yes	2	4.3925e-13		R	S	S	S	R	V	0	1	0	0	0	0	1	0	0	0	2	0	0	0	0	6	0	0	1	2	0	0	88911000	0	0	0	17088000	5353800
D7SHZ2	tr|D7SHZ2|D7SHZ2_VITVI	TSPGEQYQSIR	11	14	120.77	1264.6	SDIFDLAKTSPGEQYQ	GEQYQSIRDTVIIPRG	828	838	yes	yes	2	2.8887e-13		K	T	S	I	R	D	0	1	0	0	0	2	1	1	0	1	0	0	0	0	1	2	1	0	1	0	0	0	163290000	0	1919900	0	21836000	18505000
D7SHZ2	tr|D7SHZ2|D7SHZ2_VITVI	YVNHPEAVADAIQR	14	7	86.214	1581.79	DRFAYIFRYVNHPEAV	AVADAIQRLWPIFKAI	647	660	yes	yes	2	0.0001995		R	Y	V	Q	R	L	3	1	1	1	0	1	1	0	1	1	0	0	0	0	1	0	0	0	1	2	0	0	53007000	0	0	0	5824400	3687600
D7SI12	tr|D7SI12|D7SI12_VITVI	GLWQPFTVLLGDSPSVDVK	19	18	88.176	2057.08	QTRAENSRGLWQPFTV	DSPSVDVKKNVIVTIS	84	102	yes	yes	2	2.4724e-11		R	G	L	V	K	K	0	0	0	2	0	1	0	2	0	0	3	1	0	1	2	2	1	1	0	3	0	0	185550000	0	0	0	16693000	18613000
D7SI12	tr|D7SI12|D7SI12_VITVI	LGDLDSYEIEGGETK	15	8	155.37	1624.75	REAEAGGKLGDLDSYE	EIEGGETKGEILQNLA	231	245	yes	yes	2	1.5933e-55		K	L	G	T	K	G	0	0	0	2	0	0	3	3	0	1	2	1	0	0	0	1	1	0	1	0	0	0	85850000	0	0	1836200	24143000	26493000
D7SI12	tr|D7SI12|D7SI12_VITVI	NPLNYTQVSVLADEILK	17	12	221.85	1916.03	LCITELQKNPLNYTQV	VLADEILKNVEYDALR	172	188	yes	yes	2;3	7.9874e-177		K	N	P	L	K	N	1	0	2	1	0	1	1	0	0	1	3	1	0	0	1	1	1	0	1	2	0	0	142090000	2023600	5475700	1294600	25475000	22530000
D7SI12	tr|D7SI12|D7SI12_VITVI	NVEYDALR	8	5	78.149	978.477	VLADEILKNVEYDALR	NVEYDALRIVFNKFRS	189	196	yes	yes	2	0.0077187		K	N	V	L	R	I	1	1	1	1	0	0	1	0	0	0	1	0	0	0	0	0	0	0	1	1	0	0	105850000	0	0	0	45413000	48503000
D7SI12	tr|D7SI12|D7SI12_VITVI	SIISFVPTTSTVLSPEVVER	20	45	105.79	2160.17	RIVFNKFRSIISFVPT	LSPEVVEREAEAGGKL	204	223	yes	yes	2;3	6.7451e-20		R	S	I	E	R	E	0	1	0	0	0	0	2	0	0	2	1	0	0	1	2	4	3	0	0	4	0	0	447180000	13238000	12771000	6845500	101440000	80369000
D7SI12	tr|D7SI12|D7SI12_VITVI	SISTQIVRNR	10	5	54.066	1172.66	EQAPLGVRSISTQIVR	STQIVRNRMKSVKNIQ	41	50	yes	yes	3	0.012352		R	S	I	N	R	M	0	2	1	0	0	1	0	0	0	2	0	0	0	0	0	2	1	0	0	1	0	1	194710000	4090600	6080700	5547700	11713000	18396000
D7SI93	tr|D7SI93|D7SI93_VITVI	DVADVPQLFIVR	12	1	63.091	1370.76	YDTCGPRRDVADVPQL	VPQLFIVRYKRNATVD	492	503	yes	yes	2	0.0040305		R	D	V	V	R	Y	1	1	0	2	0	1	0	0	0	1	1	0	0	1	1	0	0	0	0	3	0	0	60827000	0	0	0	8680000	3426000
D7SI93	tr|D7SI93|D7SI93_VITVI	GIWNPFQEEDVDPASQLVAR	20	2	32.353	2270.1	LKVERRPKGIWNPFQE	PASQLVARYNGSGEIP	521	540	yes	yes	2	0.012415		K	G	I	A	R	Y	2	1	1	2	0	2	2	1	0	1	1	0	0	1	2	1	0	1	0	2	0	0	30469000	0	0	0	6058200	0
D7SI93	tr|D7SI93|D7SI93_VITVI	IATFLEGVANTGMVELGDAR	20	0	22.585	2063.04	QFSNDWKRIATFLEGV	MVELGDARLAAYLAEK	188	207	yes	yes	3	0.062916		R	I	A	A	R	L	3	1	1	1	0	0	2	3	0	1	2	0	1	1	0	0	2	0	0	2	0	0	17224000	0	0	0	5502600	0
D7SI93	tr|D7SI93|D7SI93_VITVI	LSLELNK	7	5	79.469	815.475	YCVILAGRLSLELNKM	RLSLELNKMRETMRRV	415	421	yes	yes	2	0.027217		R	L	S	N	K	M	0	0	1	0	0	0	1	0	0	0	3	1	0	0	0	1	0	0	0	0	0	0	24317000	0	0	0	0	0
D7SI93	tr|D7SI93|D7SI93_VITVI	VSSGGAASSSMASTLK	16	2	64.454	1439.69	________________	SSMASTLKAYSIPLVL	4	19	yes	yes	2	0.0005958		R	V	S	L	K	A	3	0	0	0	0	0	0	2	0	0	1	1	1	0	0	6	1	0	0	1	0	0	14964000	0	0	0	3151000	0
D7SI93	tr|D7SI93|D7SI93_VITVI	WNSGTEVPETIDFLK	15	2	38.995	1734.85	AYEKFSSKWNSGTEVP	PETIDFLKIRYAFELL	73	87	yes	yes	2	0.014329		K	W	N	L	K	I	0	0	1	1	0	0	2	1	0	1	1	1	0	1	1	1	2	1	0	1	0	0	2656700	0	0	0	0	0
D7SI93	tr|D7SI93|D7SI93_VITVI	YAFELLTDPLWK	12	13	79.492	1494.78	TIDFLKIRYAFELLTD	LLTDPLWKRDYDIFGI	90	101	yes	yes	2	0.00037769		R	Y	A	W	K	R	1	0	0	1	0	0	1	0	0	0	3	1	0	1	1	0	1	1	1	0	0	0	36650000	0	0	0	5057900	3657700
D7SIE8	tr|D7SIE8|D7SIE8_VITVI	DGNYELVTR	9	7	73.327	1065.51	IPLEEMLKDGNYELVT	GNYELVTREIFGPFQV	422	430	yes	yes	2	0.0061013		K	D	G	T	R	E	0	1	1	1	0	0	1	1	0	0	1	0	0	0	0	0	1	0	1	1	0	0	111810000	2697300	3002800	1962800	17790000	18868000
D7SIE8	tr|D7SIE8|D7SIE8_VITVI	EIFGPFQVVTDYK	13	1	54.898	1541.78	GNYELVTREIFGPFQV	FQVVTDYKDNQLPRVL	431	443	yes	yes	2	0.0061443		R	E	I	Y	K	D	0	0	0	1	0	1	1	1	0	1	0	1	0	2	1	0	1	0	1	2	0	0	19529000	0	0	0	0	0
D7SIE8	tr|D7SIE8|D7SIE8_VITVI	EIFGPFQVVTDYKDNQLPR	19	8	101.92	2265.14	GNYELVTREIFGPFQV	YKDNQLPRVLEALERM	431	449	yes	yes	3	2.4621e-19		R	E	I	P	R	V	0	1	1	2	0	2	1	1	0	1	1	1	0	2	2	0	1	0	1	2	0	1	36306000	0	0	0	11302000	7005900
D7SIE8	tr|D7SIE8|D7SIE8_VITVI	EIIYDIGPLPSHWEIPPAT	19	1	27.271	2147.09	KLVWSCHREIIYDIGP	HWEIPPAT________	528	546	yes	yes	2	0.047723		R	E	I	A	T	-	1	0	0	1	0	0	2	1	1	4	1	0	0	0	4	1	1	1	1	0	0	0	21391000	0	595150	0	6054500	4860500
D7SIE8	tr|D7SIE8|D7SIE8_VITVI	FLENFSGDQVR	11	27	155.97	1310.63	GEVYVTQKFLENFSGD	NFSGDQVRFLARSFAV	154	164	yes	yes	2	8.7261e-27		K	F	L	V	R	F	0	1	1	1	0	1	1	1	0	0	1	0	0	2	0	1	0	0	0	1	0	0	413980000	3602700	4494400	4687200	44078000	43560000
D7SIE8	tr|D7SIE8|D7SIE8_VITVI	GAGIGTPEAIK	11	3	43.897	1012.56	FGPAGDPRGAGIGTPE	IGTPEAIKLVWSCHRE	510	520	yes	yes	2	0.050599		R	G	A	I	K	L	2	0	0	0	0	0	1	3	0	2	0	1	0	0	1	0	1	0	0	0	0	0	91259000	0	0	0	14711000	11292000
D7SIE8	tr|D7SIE8|D7SIE8_VITVI	IKLEDAGFDWK	11	11	78.964	1320.67	LAVDLKGRIKLEDAGF	EDAGFDWKILGPDVQE	289	299	yes	yes	2;3	0.00057245		R	I	K	W	K	I	1	0	0	2	0	0	1	1	0	1	1	2	0	1	0	0	0	1	0	0	0	1	104000000	0	0	0	9867900	10088000
D7SIE8	tr|D7SIE8|D7SIE8_VITVI	LLLEANPR	8	7	84.568	924.539	SDGKTMNKLLLEANPR	LLLEANPRMTLFTGSS	260	267	yes	yes	2	0.0070487		K	L	L	P	R	M	1	1	1	0	0	0	1	0	0	0	3	0	0	0	1	0	0	0	0	0	0	0	272810000	0	3726500	2709900	36695000	30704000
D7SIE8	tr|D7SIE8|D7SIE8_VITVI	LLQIPGSELLFGGK	14	23	124.07	1470.84	AMLEHMNKLLQIPGSE	SELLFGGKALENHSIP	380	393	yes	yes	2	6.1117e-17		K	L	L	G	K	A	0	0	0	0	0	1	1	3	0	1	4	1	0	1	1	1	0	0	0	0	0	0	162280000	1401000	1552300	1101300	23517000	18912000
D7SIE8	tr|D7SIE8|D7SIE8_VITVI	MTLFTGSSR	9	17	100.02	998.486	LLLEANPRMTLFTGSS	TLFTGSSRVADKLAVD	268	276	yes	yes	2	0.0019266		R	M	T	S	R	V	0	1	0	0	0	0	0	1	0	0	1	0	1	1	0	2	2	0	0	0	0	0	82376000	0	0	0	21504000	15350000
D7SIE8	tr|D7SIE8|D7SIE8_VITVI	SFAVPGNHLGQQSHGFR	17	28	129.05	1837.9	DQVRFLARSFAVPGNH	GQQSHGFRWPYGPVAI	169	185	yes	yes	2;3;4	1.9001e-37		R	S	F	F	R	W	1	1	1	0	0	2	0	3	2	0	1	0	0	2	1	2	0	0	0	1	0	0	580740000	2374200	3602700	2323500	104270000	68466000
D7SIE8	tr|D7SIE8|D7SIE8_VITVI	SYQQALGEVYVTQK	14	15	143.81	1612.81	LIQRVAPKSYQQALGE	GEVYVTQKFLENFSGD	140	153	yes	yes	2	1.8407e-36		K	S	Y	Q	K	F	1	0	0	0	0	3	1	1	0	0	1	1	0	0	0	1	1	0	2	2	0	0	88211000	2007300	0	0	0	19214000
D7SIE8	tr|D7SIE8|D7SIE8_VITVI	TTGAPQNHWFGPAGDPR	17	29	107.03	1807.84	TYAGLRARTTGAPQNH	FGPAGDPRGAGIGTPE	493	509	yes	yes	2;3	8.5815e-15		R	T	T	P	R	G	2	1	1	1	0	1	0	3	1	0	0	0	0	1	3	0	2	1	0	0	0	0	326680000	2865800	3120500	2400300	55944000	36700000
D7SIE8	tr|D7SIE8|D7SIE8_VITVI	VLEALER	7	1	68.081	828.471	YKDNQLPRVLEALERM	RVLEALERMHAHLTAA	450	456	yes	yes	2	0.046694		R	V	L	E	R	M	1	1	0	0	0	0	2	0	0	0	2	0	0	0	0	0	0	0	0	1	0	0	222420000	5766500	0	4135000	48767000	26880000
D7SIE8	tr|D7SIE8|D7SIE8_VITVI	VSDFFTR	7	25	115.69	870.424	AHMLSLPKVSDFFTRL	KVSDFFTRLIQRVAPK	125	131	yes	yes	2	0.011322		K	V	S	T	R	L	0	1	0	1	0	0	0	0	0	0	0	0	0	2	0	1	1	0	0	1	0	0	245550000	1964500	1831800	1574700	31492000	23242000
D7SIE8	tr|D7SIE8|D7SIE8_VITVI	VSIVMEQMIR	10	9	80.24	1204.63	PILKVDSKVSIVMEQM	IVMEQMIRLLHHCGLP	226	235	yes	yes	2	0.00061054	300;301	K	V	S	I	R	L	0	1	0	0	0	1	1	0	0	2	0	0	2	0	0	1	0	0	0	2	0	0	131190000	6047900	7254000	5879200	25265000	12206000
D7SIE8	tr|D7SIE8|D7SIE8_VITVI	YLMLGDISNK	10	26	64.82	1152.58	NPFKAPERYLMLGDIS	MLGDISNKAAHMLSLP	106	115	yes	yes	2	0.0029606	302	R	Y	L	N	K	A	0	0	1	1	0	0	0	1	0	1	2	1	1	0	0	1	0	0	1	0	0	0	190300000	0	0	2745800	16263000	24607000
D7SIH0	tr|D7SIH0|D7SIH0_VITVI	FIDYVMSK	8	13	64.711	1001.49	SASTGSDKFIDYVMSK	FIDYVMSKMAVLGLVK	62	69	yes	yes	2	0.0052353	303	K	F	I	S	K	M	0	0	0	1	0	0	0	0	0	1	0	1	1	1	0	1	0	0	1	1	0	0	184530000	0	0	0	0	0
D7SIH0	tr|D7SIH0|D7SIH0_VITVI	MAVLGLVK	8	17	77.058	829.51	FIDYVMSKMAVLGLVK	MAVLGLVKSASRQLGA	70	77	yes	yes	2	0.0089418	304	K	M	A	V	K	S	1	0	0	0	0	0	0	1	0	0	2	1	1	0	0	0	0	0	0	2	0	0	119890000	0	0	0	0	0
D7SIH5	tr|D7SIH5|D7SIH5_VITVI	GAPEQILNLAR	11	4	59.418	1180.66	GKMHRVSKGAPEQILN	EQILNLARNKSEIERR	428	438	yes	yes	2	0.0093806		K	G	A	A	R	N	2	1	1	0	0	1	1	1	0	1	2	0	0	0	1	0	0	0	0	0	0	0	47359000	2270200	3110100	2989000	12422000	7991900
D7SIH5	tr|D7SIH5|D7SIH5_VITVI	LAIFGYNR	8	9	111.04	952.513	TSEAAQERLAIFGYNR	LAIFGYNRLEEKKESK	46	53	yes	yes	2	0.0030216		R	L	A	N	R	L	1	1	1	0	0	0	0	1	0	1	1	0	0	1	0	0	0	0	1	0	0	0	90588000	3553500	2479600	2262500	19645000	17269000
D7SIH5	tr|D7SIH5|D7SIH5_VITVI	TALTYIDSEGK	11	5	73.435	1196.59	PFNPTDKRTALTYIDS	TYIDSEGKMHRVSKGA	411	421	yes	yes	2	0.0019392		R	T	A	G	K	M	1	0	0	1	0	0	1	1	0	1	1	1	0	0	0	1	2	0	1	0	0	0	55811000	0	2330900	1997100	5759700	6330900
D7SIH5	tr|D7SIH5|D7SIH5_VITVI	TLHGLQPPDTK	11	15	64.688	1205.64	LKWAHAQRTLHGLQPP	GLQPPDTKMFTDRTNF	889	899	yes	yes	3	0.00095316		R	T	L	T	K	M	0	0	0	1	0	1	0	1	1	0	2	1	0	0	2	0	2	0	0	0	0	0	99232000	1264300	0	2835300	10798000	12705000
D7SIH5	tr|D7SIH5|D7SIH5_VITVI	VFHVSTLEK	9	4	79.986	1058.58	YKTDFFPRVFHVSTLE	FHVSTLEKTAHDDFRK	744	752	yes	yes	2;3	0.0049365		R	V	F	E	K	T	0	0	0	0	0	0	1	0	1	0	1	1	0	1	0	1	1	0	0	2	0	0	317030000	8596400	9726400	5374200	36899000	41901000
D7SIH5	tr|D7SIH5|D7SIH5_VITVI	WSEEDAAVLVPGDIISIK	18	24	118.72	1941.01	AKVLRDGRWSEEDAAV	PGDIISIKLGDIIPAD	144	161	yes	no	2;3	8.7902e-29		R	W	S	I	K	L	2	0	0	2	0	0	2	1	0	3	1	1	0	0	1	2	0	1	0	2	0	0	376780000	5509200	5418400	2574400	47596000	33412000
D7SIK2	tr|D7SIK2|D7SIK2_VITVI	AAGLFAGSIFLMR	13	7	76.073	1352.73	ALNMKLLRAAGLFAGS	AGSIFLMRNFGEYMAI	34	46	yes	yes	2	0.00023167	305	R	A	A	M	R	N	3	1	0	0	0	0	0	2	0	1	2	0	1	2	0	1	0	0	0	0	0	0	53536000	0	0	0	4205300	0
D7SIK2	tr|D7SIK2|D7SIK2_VITVI	ADTVVSLDNIK	11	1	42.446	1173.62	________________	VVSLDNIKAFWNAQIH	2	12	yes	yes	2	0.054219		M	A	D	I	K	A	1	0	1	2	0	0	0	0	0	1	1	1	0	0	0	1	1	0	0	2	0	0	0	0	0	0	0	0
D7SIK2	tr|D7SIK2|D7SIK2_VITVI	NFGEYMAI	8	1	81.784	943.411	AGSIFLMRNFGEYMAI	NFGEYMAI________	47	54	yes	yes	1	0.032098		R	N	F	A	I	-	1	0	1	0	0	0	1	1	0	1	0	0	1	1	0	0	0	0	1	0	0	0	3798000	0	0	0	0	701490
D7SIN7	tr|D7SIN7|D7SIN7_VITVI	DVAALMEYK	9	2	44.57	1038.51	IICGTVARDVAALMEY	VAALMEYKGLSLEEAA	251	259	yes	yes	2	0.025748		R	D	V	Y	K	G	2	0	0	1	0	0	1	0	0	0	1	1	1	0	0	0	0	0	1	1	0	0	26995000	535280	0	0	0	0
D7SIN7	tr|D7SIN7|D7SIN7_VITVI	ELENNPNFNAGR	12	16	174.4	1373.63	DVVELVVRELENNPNF	NPNFNAGRGSVLTTDG	57	68	yes	yes	2	1.3782e-43		R	E	L	G	R	G	1	1	4	0	0	0	2	1	0	0	1	0	0	1	1	0	0	0	0	0	0	0	261680000	1667900	0	2107500	25787000	22964000
D7SIN7	tr|D7SIN7|D7SIN7_VITVI	EQGVETVDASHFITPENIER	20	21	109.65	2270.08	DGAEAFAREQGVETVD	ITPENIERLKQAKEAN	131	150	yes	yes	2;3	5.9758e-27		R	E	Q	E	R	L	1	1	1	1	0	1	4	1	1	2	0	0	0	1	1	1	2	0	0	2	0	0	196210000	0	0	0	23589000	12178000
D7SIN7	tr|D7SIN7|D7SIN7_VITVI	GNLAAATSTGGLVNK	15	6	81.703	1372.73	GCVAVDTRGNLAAATS	STGGLVNKMVGRIGDT	197	211	yes	yes	2	0.00012041		R	G	N	N	K	M	3	0	2	0	0	0	0	3	0	0	2	1	0	0	0	1	2	0	0	1	0	0	70770000	0	0	0	7337100	4735700
D7SIN7	tr|D7SIN7|D7SIN7_VITVI	RPPLDVVELVVR	12	3	83.204	1390.83	GVAALQTKRPPLDVVE	DVVELVVRELENNPNF	45	56	yes	yes	2	0.00052591		K	R	P	V	R	E	0	2	0	1	0	0	1	0	0	0	2	0	0	0	2	0	0	0	0	4	0	1	22674000	0	0	0	0	0
D7SIN7	tr|D7SIN7|D7SIN7_VITVI	TPHIYLAFDGAEAFAR	16	0	35.492	1777.88	LARLVMEKTPHIYLAF	DGAEAFAREQGVETVD	115	130	yes	yes	3	0.010077		K	T	P	A	R	E	4	1	0	1	0	0	1	1	1	1	1	0	0	2	1	0	1	0	1	0	0	0	7843300	0	0	0	0	0
D7SIN9	tr|D7SIN9|D7SIN9_VITVI	VLLGIGGGHYAPR	13	1	64.121	1308.73	NRNDGNNKVLLGIGGG	GGGHYAPRHMDIVRND	207	219	yes	yes	3	0.00042029		K	V	L	P	R	H	1	1	0	0	0	0	0	4	1	1	2	0	0	0	1	0	0	0	1	1	0	0	21972000	0	0	0	0	3140100
D7SIR0	tr|D7SIR0|D7SIR0_VITVI	EFFSTSDVLQIFR	13	1	57.106	1587.79	ANVMKAKKEFFSTSDV	SDVLQIFRQLCAGLKH	150	162	yes	yes	2	0.0051496		K	E	F	F	R	Q	0	1	0	1	0	1	1	0	0	1	1	0	0	3	0	2	1	0	0	1	0	0	0	0	0	0	0	0
D7SIR0	tr|D7SIR0|D7SIR0_VITVI	GQPPLAVLMDFGSAR	15	1	31.089	1557.8	NVLLTHRKGQPPLAVL	LMDFGSARPARKQIRS	195	209	yes	yes	2	0.059207		K	G	Q	A	R	P	2	1	0	1	0	1	0	2	0	0	2	0	1	1	2	1	0	0	0	1	0	0	0	0	0	0	0	0
D7SIR1	tr|D7SIR1|D7SIR1_VITVI	DTGPTFVVIKPTPSSAAPVQK	21	32	195.48	2139.16	SMDDSWFRDTGPTFVV	SSAAPVQKIAGIDWNF	93	113	yes	yes	2;3	3.2439e-159		R	D	T	Q	K	I	2	0	0	1	0	1	0	1	0	1	0	2	0	1	4	2	3	0	0	3	0	1	370710000	0	0	3969900	44738000	37171000
D7SIR1	tr|D7SIR1|D7SIR1_VITVI	EQIEAELK	8	2	88.819	958.497	NRNPHLTKEQIEAELK	EQIEAELKSYLGVKKV	192	199	yes	yes	2	0.0077297		K	E	Q	L	K	S	1	0	0	0	0	1	3	0	0	1	1	1	0	0	0	0	0	0	0	0	0	0	91270000	0	0	0	0	1491000
D7SIR1	tr|D7SIR1|D7SIR1_VITVI	IIAPVFGDQK	10	3	55.467	1086.61	NFYIANGRIIAPVFGD	APVFGDQKWDDEAVRV	320	329	yes	yes	2	0.020124		R	I	I	Q	K	W	1	0	0	1	0	1	0	1	0	2	0	1	0	1	1	0	0	0	0	1	0	0	188310000	0	0	0	0	0
D7SIR1	tr|D7SIR1|D7SIR1_VITVI	LAASYVNFYIANGR	14	18	122.39	1557.79	KLRVAGTRLAASYVNF	NFYIANGRIIAPVFGD	306	319	yes	yes	2	1.1535e-16		R	L	A	G	R	I	3	1	2	0	0	0	0	1	0	1	1	0	0	1	0	1	0	0	2	1	0	0	83328000	237900	0	0	11929000	6622700
D7SIR1	tr|D7SIR1|D7SIR1_VITVI	LHVPGPLYMTDEEASGILQDDNAK	24	23	134.87	2612.24	GRKLQIIKLHVPGPLY	ILQDDNAKLRVAGTRL	275	298	yes	yes	3	5.7096e-77	306	K	L	H	A	K	L	2	0	1	3	0	1	2	2	1	1	3	1	1	0	2	1	1	0	1	1	0	0	122340000	946680	0	0	21706000	9981800
D7SIR1	tr|D7SIR1|D7SIR1_VITVI	PGVVLLSWTDDELDPQYER	19	8	73.928	2231.07	DNMCCFAKPGVVLLSW	ELDPQYERSVEAFSVL	233	251	yes	yes	2;3	1.7564e-08		K	P	G	E	R	S	0	1	0	3	0	1	2	1	0	0	3	0	0	0	2	1	1	1	1	2	0	0	76034000	0	0	0	10808000	12091000
D7SIR1	tr|D7SIR1|D7SIR1_VITVI	SLLPQHIR	8	4	75.109	962.566	AAQWANARSLLPQHIR	SLLPQHIRVVEMSMDD	73	80	yes	yes	2	0.0095687		R	S	L	I	R	V	0	1	0	0	0	1	0	0	1	1	2	0	0	0	1	1	0	0	0	0	0	0	192810000	0	0	0	0	1729800
D7SIR1	tr|D7SIR1|D7SIR1_VITVI	SVEAFSVLSNATDAR	15	28	263.83	1565.77	ELDPQYERSVEAFSVL	LSNATDARGRKLQIIK	252	266	yes	yes	2;3	2.6275e-284		R	S	V	A	R	G	3	1	1	1	0	0	1	0	0	0	1	0	0	1	0	3	1	0	0	2	0	0	494130000	5251400	8657600	4604400	65259000	20615000
D7SIR1	tr|D7SIR1|D7SIR1_VITVI	VFAEVASAISK	11	10	77.597	1120.61	DHAGPAQRVFAEVASA	EVASAISKFEPVTVCA	45	55	yes	yes	2	0.0013212		R	V	F	S	K	F	3	0	0	0	0	0	1	0	0	1	0	1	0	1	0	2	0	0	0	2	0	0	279840000	2734100	3104000	2370200	20187000	30671000
D7SIR1	tr|D7SIR1|D7SIR1_VITVI	VLSLAFPNHEVVGIK	15	17	137.8	1621.92	KWDDEAVRVLSLAFPN	NHEVVGIKGAREIALA	337	351	yes	yes	2;3	7.4691e-39		R	V	L	I	K	G	1	0	1	0	0	0	1	1	1	1	2	1	0	1	1	1	0	0	0	3	0	0	214500000	1744300	1875100	1226500	19142000	15929000
D7SIR1	tr|D7SIR1|D7SIR1_VITVI	VVEMSMDDSWFR	12	50	122.34	1500.64	SLLPQHIRVVEMSMDD	SMDDSWFRDTGPTFVV	81	92	yes	yes	2	1.3996e-11	307;308	R	V	V	F	R	D	0	1	0	2	0	0	1	0	0	0	0	0	2	1	0	2	0	1	0	2	0	0	526580000	1875800	5526400	3466600	50015000	42034000
D7SIR4	tr|D7SIR4|D7SIR4_VITVI	LASLKPLPLNQLSDLIR	17	2	36.451	1890.13	YNNVPRRKLASLKPLP	NQLSDLIRLEIAMNGF	386	402	yes	yes	3	0.0092362		K	L	A	I	R	L	1	1	1	1	0	1	0	0	0	1	6	1	0	0	2	2	0	0	0	0	0	1	5978500	0	0	0	0	0
D7SIR4	tr|D7SIR4|D7SIR4_VITVI	LSNEPEFLPGR	11	7	76.165	1257.64	DDTGYYIKLSNEPEFL	EPEFLPGRQASIIYRG	540	550	yes	yes	2	0.0067054		K	L	S	G	R	Q	0	1	1	0	0	0	2	1	0	0	2	0	0	1	2	1	0	0	0	0	0	0	40437000	0	0	0	10744000	6430100
D7SIR4	tr|D7SIR4|D7SIR4_VITVI	SADFEVVR	8	0	66.546	921.456	AVIIGNPRSADFEVVR	SADFEVVRTSLMPGAL	445	452	yes	yes	2	0.03502		R	S	A	V	R	T	1	1	0	1	0	0	1	0	0	0	0	0	0	1	0	1	0	0	0	2	0	0	105840000	0	0	0	11734000	14407000
D7SIR4	tr|D7SIR4|D7SIR4_VITVI	STAVIIGNPR	10	10	99.013	1026.58	MLNRKDDKSTAVIIGN	AVIIGNPRSADFEVVR	435	444	yes	yes	2	0.0002978		K	S	T	P	R	S	1	1	1	0	0	0	0	1	0	2	0	0	0	0	1	1	1	0	0	1	0	0	114050000	2582600	1476700	1883000	14695000	9761800
D7SIR4	tr|D7SIR4|D7SIR4_VITVI	YNSFIDLQDR	10	2	65.179	1269.6	GITFDESRYNSFIDLQ	SFIDLQDRLHQNICRR	137	146	yes	yes	2	0.008386		R	Y	N	D	R	L	0	1	1	2	0	1	0	0	0	1	1	0	0	1	0	1	0	0	1	0	0	0	62920000	0	0	0	0	0
D7SIS5	tr|D7SIS5|D7SIS5_VITVI	AIFTQDFIIR	10	7	87.149	1222.67	RLKISNAKAIFTQDFI	FTQDFIIRGDKSLPLY	218	227	yes	yes	2	0.0014158		K	A	I	I	R	G	1	1	0	1	0	1	0	0	0	3	0	0	0	2	0	0	1	0	0	0	0	0	27288000	0	0	0	0	355630
D7SIS5	tr|D7SIS5|D7SIS5_VITVI	EVWSVAYALDTLGLEK	16	2	40.493	1792.92	MTLEELRREVWSVAYA	LDTLGLEKGSAIAIDM	152	167	yes	yes	2	0.013382		R	E	V	E	K	G	2	0	0	1	0	0	2	1	0	0	3	1	0	0	0	1	1	1	1	2	0	0	7011500	0	0	0	7011500	0
D7SIS5	tr|D7SIS5|D7SIS5_VITVI	VTMLGVIPSIVR	12	3	44.829	1283.76	AKFVQDAKVTMLGVIP	GVIPSIVRTWKSTNCT	380	391	yes	yes	2	0.028735		K	V	T	V	R	T	0	1	0	0	0	0	0	1	0	2	1	0	1	0	1	1	1	0	0	3	0	0	20182000	0	0	0	2818800	3140400
D7SIX7	tr|D7SIX7|D7SIX7_VITVI	EPDLVESFIPLVK	13	18	133.32	1484.81	CRIGAQMREPDLVESF	ESFIPLVKRLAAGEWF	174	186	yes	yes	2	2.5734e-19		R	E	P	V	K	R	0	0	0	1	0	0	2	0	0	1	2	1	0	1	2	1	0	0	0	2	0	0	133370000	1846700	1894700	1219100	14343000	17791000
D7SIX7	tr|D7SIX7|D7SIX7_VITVI	LAAGEWFTAR	10	2	61.958	1120.57	SFIPLVKRLAAGEWFT	AGEWFTARVSSCGLFH	188	197	yes	yes	2	0.011818		R	L	A	A	R	V	3	1	0	0	0	0	1	1	0	0	1	0	0	1	0	0	1	1	0	0	0	0	194550000	2239300	3717000	0	28881000	27631000
D7SIX7	tr|D7SIX7|D7SIX7_VITVI	LAEEFGPDWAMQHIIPQVLDMINNPHYLYR	30	16	102.21	3609.75	AAANNVKRLAEEFGPD	NNPHYLYRMTILHAIS	518	547	yes	yes	4	2.0373e-56	309;310	R	L	A	Y	R	M	2	1	2	2	0	2	2	1	2	3	3	0	2	1	3	0	0	1	2	1	0	0	205270000	0	0	0	25888000	0
D7SIX7	tr|D7SIX7|D7SIX7_VITVI	LDQVNQVIGIDLLSQSLLPAIVELAEDR	28	2	82.126	3060.67	VRLNIISKLDQVNQVI	IVELAEDRHWRVRLAI	437	464	yes	yes	3	9.7238e-27		K	L	D	D	R	H	2	1	1	3	0	3	2	1	0	3	6	0	0	0	1	2	0	0	0	3	0	0	141950000	0	0	0	41842000	33635000
D7SIX7	tr|D7SIX7|D7SIX7_VITVI	LLPVVINAAK	10	3	53.751	1036.66	GPEITCSKLLPVVINA	PVVINAAKDRVPNIKF	570	579	yes	yes	2	0.025055		K	L	L	A	K	D	2	0	1	0	0	0	0	0	0	1	2	1	0	0	1	0	0	0	0	2	0	0	318090000	3613200	1260200	0	25542000	20318000
D7SIX7	tr|D7SIX7|D7SIX7_VITVI	VLQSLTPIVDQSVVDK	16	33	130.29	1739.97	NIKFNVAKVLQSLTPI	VDQSVVDKTIRPCLVE	592	607	yes	yes	2;3	1.4443e-29		K	V	L	D	K	T	0	0	0	2	0	2	0	0	0	1	2	1	0	0	1	2	1	0	0	4	0	0	189680000	1992100	1109200	0	18281000	13595000
D7SIX7	tr|D7SIX7|D7SIX7_VITVI	SDLVPAYVR	9	3	70.256	1018.54	AVGPEPTRSDLVPAYV	DLVPAYVRLLRDNEAE	334	342	yes	no	2	0.0076088		R	S	D	V	R	L	1	1	0	1	0	0	0	0	0	0	1	0	0	0	1	1	0	0	1	2	0	0	140170000	0	0	0	48043000	46986000
D7SIX7	tr|D7SIX7|D7SIX7_VITVI	ADIMSIFEDLTQDDQDSVR	19	1	50.358	2196.98	TVEAAHLKADIMSIFE	QDDQDSVRLLAVEGCA	256	274	yes	no	2	0.0010414		K	A	D	V	R	L	1	1	0	5	0	2	1	0	0	2	1	0	1	1	0	2	1	0	0	1	0	0	5852200	0	0	0	0	2619000
D7SIZ7	tr|D7SIZ7|D7SIZ7_VITVI	TGGGILLPTTAQTKPQGGEVVAVGEGR	27	8	108.44	2592.39	KIKTVEEKTGGGILLP	VVAVGEGRTVGKNKVD	78	104	yes	yes	3	1.2299e-46		K	T	G	G	R	T	2	1	0	0	0	2	2	7	0	1	2	1	0	0	2	0	4	0	0	3	0	1	50375000	0	0	2628300	19422000	13839000
D7SIZ7	tr|D7SIZ7|D7SIZ7_VITVI	YTSLKPLADR	10	4	60.255	1162.63	AATSIGPKYTSLKPLA	SLKPLADRVLVKIKTV	57	66	yes	yes	3	0.0070468		K	Y	T	D	R	V	1	1	0	1	0	0	0	0	0	0	2	1	0	0	1	1	1	0	1	0	0	1	17406000	0	479110	0	5419100	5438600
D7SJ02	tr|D7SJ02|D7SJ02_VITVI	IMTQPINLIFR	11	10	125.74	1344.76	MATTKVQRIMTQPINL	QPINLIFRFLQSKARI	9	19	yes	yes	2	3.8487e-12	311	R	I	M	F	R	F	0	1	1	0	0	1	0	0	0	3	1	0	1	1	1	0	1	0	0	0	0	0	106680000	0	0	811040	7552500	0
D7SJ02	tr|D7SJ02|D7SJ02_VITVI	IQIWLFEQK	9	5	160.59	1203.67	RFLQSKARIQIWLFEQ	QIWLFEQKDLRIEGRI	27	35	yes	yes	2	1.1918e-14		R	I	Q	Q	K	D	0	0	0	0	0	2	1	0	0	2	1	1	0	1	0	0	0	1	0	0	0	0	19877000	0	0	0	0	0
D7SJ83	tr|D7SJ83|D7SJ83_VITVI	AFMWDSGSNVGEFDGHSK	18	0	45.916	1969.83	GKGKSFVRAFMWDSGS	GEFDGHSKRVLSCAFK	129	146	yes	yes	3	0.0025029		R	A	F	S	K	R	1	0	1	2	0	0	1	3	1	0	0	1	1	2	0	3	0	1	0	1	0	0	39816000	0	0	0	9985100	6465100
D7SJ83	tr|D7SJ83|D7SJ83_VITVI	EAVVWDR	7	1	81.191	873.434	FASGDANREAVVWDRA	REAVVWDRASREVRVK	514	520	yes	yes	2	0.0095813		R	E	A	D	R	A	1	1	0	1	0	0	1	0	0	0	0	0	0	0	0	0	0	1	0	2	0	0	0	0	0	0	0	0
D7SJ83	tr|D7SJ83|D7SJ83_VITVI	FSPNGEWIASADVSGTVR	18	3	45.237	1891.91	AYQATVARFSPNGEWI	ADVSGTVRIWGTHNDH	65	82	yes	yes	2	0.0039714		R	F	S	V	R	I	2	1	1	1	0	0	1	2	0	1	0	0	0	1	1	3	1	1	0	2	0	0	32659000	0	0	0	10271000	5721700
D7SJ83	tr|D7SJ83|D7SJ83_VITVI	IDDLQWSADGMR	12	14	117.93	1405.63	EFRVLSGRIDDLQWSA	QWSADGMRIVVSGDGK	103	114	yes	yes	2	3.3809e-16	312	R	I	D	M	R	I	1	1	0	3	0	1	0	1	0	1	1	0	1	0	0	1	0	1	0	0	0	0	185860000	3037900	0	3238400	45091000	30737000
D7SJ83	tr|D7SJ83|D7SJ83_VITVI	IWGTHNDHVLK	11	11	124.12	1318.68	ADVSGTVRIWGTHNDH	THNDHVLKKEFRVLSG	83	93	yes	yes	2;3	8.216e-11		R	I	W	L	K	K	0	0	1	1	0	0	0	1	2	1	1	1	0	0	0	0	1	1	0	1	0	0	106890000	0	0	0	16570000	39303000
D7SJ83	tr|D7SJ83|D7SJ83_VITVI	WIQGIGYSGR	10	4	79.659	1135.58	SYDGLIIKWIQGIGYS	QGIGYSGRLDRKENSQ	352	361	yes	yes	2	0.0024281		K	W	I	G	R	L	0	1	0	0	0	1	0	3	0	2	0	0	0	0	0	1	0	1	1	0	0	0	41568000	0	0	0	0	5731300
D7SJ83	tr|D7SJ83|D7SJ83_VITVI	YSPDVSMFASGDANR	15	4	69.331	1615.69	RGAITVIRYSPDVSMF	FASGDANREAVVWDRA	499	513	yes	yes	2	0.0008245		R	Y	S	N	R	E	2	1	1	2	0	0	0	1	0	0	0	0	1	1	1	3	0	0	1	1	0	0	34472000	0	0	0	11113000	11603000
D7SJ96	tr|D7SJ96|D7SJ96_VITVI	FGNVAGYR	8	1	85.813	882.435	LEESADKKFGNVAGYR	FGNVAGYRLYKSTTSP	239	246	yes	yes	2	0.0069236		K	F	G	Y	R	L	1	1	1	0	0	0	0	2	0	0	0	0	0	1	0	0	0	0	1	1	0	0	67530000	0	0	0	14147000	7687400
D7SJ96	tr|D7SJ96|D7SJ96_VITVI	ILQWGEDR	8	2	79.474	1015.51	LGIFLLMRILQWGEDR	ILQWGEDRRFDEMRSN	85	92	yes	yes	2	0.0056255		R	I	L	D	R	R	0	1	0	1	0	1	1	1	0	1	1	0	0	0	0	0	0	1	0	0	0	0	0	0	0	0	0	0
D7SJ96	tr|D7SJ96|D7SJ96_VITVI	TTFLLEFPFYSR	12	5	54.343	1519.77	GNLPSWFKTTFLLEFP	LEFPFYSRNLPQEGQN	272	283	yes	yes	2	0.0090758		K	T	T	S	R	N	0	1	0	0	0	0	1	0	0	0	2	0	0	3	1	1	2	0	1	0	0	0	13341000	0	0	0	5986700	3611700
D7SJB1	tr|D7SJB1|D7SJB1_VITVI	EDFGAFVQR	9	0	63.816	1067.5	RKLKKTIREDFGAFVQ	DFGAFVQRLQLLPPPQ	32	40	yes	yes	2	0.065963		R	E	D	Q	R	L	1	1	0	1	0	1	1	1	0	0	0	0	0	2	0	0	0	0	0	1	0	0	59714000	0	0	0	4283300	0
D7SJB1	tr|D7SJB1|D7SJB1_VITVI	ENLENYLDSK	10	1	59.198	1223.57	FGRQVLKRENLENYLD	LENYLDSKVPSLKAFH	270	279	yes	yes	2	0.014993		R	E	N	S	K	V	0	0	2	1	0	0	2	0	0	0	2	1	0	0	0	1	0	0	1	0	0	0	39810000	0	0	0	0	0
D7SJB1	tr|D7SJB1|D7SJB1_VITVI	LQLLPPPQPAPPK	13	3	46.069	1394.83	DFGAFVQRLQLLPPPQ	PPQPAPPKAPHPLTNL	41	53	yes	yes	2	0.018707		R	L	Q	P	K	A	1	0	0	0	0	2	0	0	0	0	3	1	0	0	6	0	0	0	0	0	0	0	24425000	0	0	0	0	0
D7SJB1	tr|D7SJB1|D7SJB1_VITVI	TIREDFGAFVQR	12	1	49.483	1437.74	LMTRKLKKTIREDFGA	DFGAFVQRLQLLPPPQ	29	40	yes	yes	3	0.0065445		K	T	I	Q	R	L	1	2	0	1	0	1	1	1	0	1	0	0	0	2	0	0	1	0	0	1	0	1	0	0	0	0	0	0
D7SJB1	tr|D7SJB1|D7SJB1_VITVI	VYQVVLK	7	6	88.643	847.517	SLRIPVDRVYQVVLKS	RVYQVVLKSTEKLFGR	250	256	yes	yes	2	0.017931		R	V	Y	L	K	S	0	0	0	0	0	1	0	0	0	0	1	1	0	0	0	0	0	0	1	3	0	0	47985000	0	0	0	0	0
D7SJB1	tr|D7SJB1|D7SJB1_VITVI	YALVLEPTNK	10	1	44.318	1146.63	KDAIEDFRYALVLEPT	LVLEPTNKRASLSADR	567	576	yes	yes	2	0.064782		R	Y	A	N	K	R	1	0	1	0	0	0	1	0	0	0	2	1	0	0	1	0	1	0	1	1	0	0	13401000	0	0	0	0	0
D7SJC2	tr|D7SJC2|D7SJC2_VITVI	ALEWLTLASQR	11	1	48.115	1286.7	GVERNYTKALEWLTLA	WLTLASQRLPSAYNGM	207	217	yes	yes	2	0.028909		K	A	L	Q	R	L	2	1	0	0	0	1	1	0	0	0	3	0	0	0	0	1	1	1	0	0	0	0	25737000	0	0	0	3103300	0
D7SJC2	tr|D7SJC2|D7SJC2_VITVI	HVAAAPEAALPLLPNEHGVLAAPH	24	1	25.581	2394.28	YLRERQRRHVAAAPEA	HGVLAAPH________	553	576	yes	yes	3	0.0051644		R	H	V	P	H	-	7	0	1	0	0	0	2	1	3	0	4	0	0	0	4	0	0	0	0	2	0	0	5550600	0	0	0	0	0
D7SJC2	tr|D7SJC2|D7SJC2_VITVI	LPVTLALTSLWIR	13	2	76.073	1481.9	LEIDSAAKLPVTLALT	ALTSLWIRKNYASSFL	483	495	yes	yes	2	0.00087906		K	L	P	I	R	K	1	1	0	0	0	0	0	0	0	1	4	0	0	0	1	1	2	1	0	1	0	0	3964000	0	0	0	0	0
D7SJC2	tr|D7SJC2|D7SJC2_VITVI	SMELLGEIYAR	11	2	57.175	1280.64	AVEKGEPRSMELLGEI	LLGEIYARGAGVERNY	186	196	yes	yes	2	0.011425		R	S	M	A	R	G	1	1	0	0	0	0	2	1	0	1	2	0	1	0	0	1	0	0	1	0	0	0	8091500	0	0	0	0	1892100
D7SJC2	tr|D7SJC2|D7SJC2_VITVI	WALESYLK	8	2	73.665	1008.53	GPWSSLSRWALESYLK	WALESYLKGDVGKAFL	334	341	yes	yes	2	0.010033		R	W	A	L	K	G	1	0	0	0	0	0	1	0	0	0	2	1	0	0	0	1	0	1	1	0	0	0	9823100	0	0	0	0	0
D7SJC2	tr|D7SJC2|D7SJC2_VITVI	YYDQALEIDSAAK	13	5	89.231	1485.7	FDLHLAKRYYDQALEI	LEIDSAAKLPVTLALT	470	482	yes	yes	2	6.4498e-06		R	Y	Y	A	K	L	3	0	0	2	0	1	1	0	0	1	1	1	0	0	0	1	0	0	2	0	0	0	0	0	0	0	0	0
D7SJF5	tr|D7SJF5|D7SJF5_VITVI	AMQLMTDNR	9	1	80.755	1078.49	SPNTKVLRAMQLMTDN	MQLMTDNRIRHIPVID	210	218	yes	yes	2	0.0027712		R	A	M	N	R	I	1	1	1	1	0	1	0	0	0	0	1	0	2	0	0	0	1	0	0	0	0	0	48615000	0	0	1533300	13601000	11470000
D7SJF5	tr|D7SJF5|D7SJF5_VITVI	HIPVIDDKEMIGMVSIGDVVR	21	1	30.244	2322.21	LMTDNRIRHIPVIDDK	VSIGDVVRAVVTEHRE	221	241	yes	yes	3	0.0029553		R	H	I	V	R	A	0	1	0	3	0	0	1	2	1	4	0	1	2	0	1	1	0	0	0	4	0	1	0	0	0	0	0	0
D7SJF5	tr|D7SJF5|D7SJF5_VITVI	LITVSPNTK	9	2	42.718	971.565	DIMTEENKLITVSPNT	ITVSPNTKVLRAMQLM	198	206	yes	yes	2	0.041281		K	L	I	T	K	V	0	0	1	0	0	0	0	0	0	1	1	1	0	0	1	1	2	0	0	1	0	0	36306000	0	5940400	3446800	0	0
D7SJF5	tr|D7SJF5|D7SJF5_VITVI	SIAGIITER	9	13	77.662	958.545	VVKPGEQKSIAGIITE	IAGIITERDYLRKIIV	162	170	yes	yes	2	0.0053285		K	S	I	E	R	D	1	1	0	0	0	0	1	1	0	3	0	0	0	0	0	1	1	0	0	0	0	0	260480000	5427300	8474800	0	46773000	30120000
D7SJF5	tr|D7SJF5|D7SJF5_VITVI	SMTHHNVGALVVVKPGEQK	19	1	42.118	2030.07	DSVYDAVKSMTHHNVG	VVKPGEQKSIAGIITE	143	161	yes	yes	3	0.0061314	313	K	S	M	Q	K	S	1	0	1	0	0	1	1	2	2	0	1	2	1	0	1	1	1	0	0	4	0	1	6746100	0	0	0	2500600	3212300
D7SJF5	tr|D7SJF5|D7SJF5_VITVI	VGDIMTEENK	10	3	78.488	1134.52	GRSSKSTKVGDIMTEE	DIMTEENKLITVSPNT	188	197	yes	yes	2	0.0026528		K	V	G	N	K	L	0	0	1	1	0	0	2	1	0	1	0	1	1	0	0	0	1	0	0	1	0	0	36719000	2097800	2294700	2211700	0	5258700
D7SJJ3	tr|D7SJJ3|D7SJJ3_VITVI	AQEGFFNSLVNIVVK	15	17	134.14	1663.89	NYGSEVLKAQEGFFNS	SLVNIVVKVMGDVFPK	59	73	yes	yes	2	4.9915e-30		K	A	Q	V	K	V	1	0	2	0	0	1	1	1	0	1	1	1	0	2	0	1	0	0	0	3	0	0	111350000	0	0	0	9845100	10223000
D7SJJ6	tr|D7SJJ6|D7SJJ6_VITVI	DTSLTYETNR	10	1	55.721	1198.55	LLAKLLEKDTSLTYET	SLTYETNRIWGQIVDK	964	973	yes	yes	2	0.019394		K	D	T	N	R	I	0	1	1	1	0	0	1	0	0	0	1	0	0	0	0	1	3	0	1	0	0	0	9062200	0	0	0	6698900	0
D7SJJ6	tr|D7SJJ6|D7SJJ6_VITVI	LPVLLSR	7	3	73.324	796.517	KVYGFNDKLPVLLSRI	KLPVLLSRILAIAKSF	702	708	yes	yes	2	0.014661		K	L	P	S	R	I	0	1	0	0	0	0	0	0	0	0	3	0	0	0	1	1	0	0	0	1	0	0	4663400	0	0	0	0	0
D7SJJ6	tr|D7SJJ6|D7SJJ6_VITVI	SEDYLAHLIGHEGR	14	6	58.885	1595.77	LRQDYLKKSEDYLAHL	HLIGHEGRGSLHFFLK	384	397	yes	yes	3	0.0011136		K	S	E	G	R	G	1	1	0	1	0	0	2	2	2	1	2	0	0	0	0	1	0	0	1	0	0	0	15999000	0	0	0	5314500	0
D7SJL8	tr|D7SJL8|D7SJL8_VITVI	DMVALSGAHTIGQAR	15	1	50.305	1525.77	QAQGLSTRDMVALSGA	AHTIGQARCTSFRARI	186	200	yes	yes	2	0.0030893	314	R	D	M	A	R	C	3	1	0	1	0	1	0	2	1	1	1	0	1	0	0	1	1	0	0	1	0	0	0	0	0	0	0	0
D7SJL8	tr|D7SJL8|D7SJL8_VITVI	DSVVILGGPDWDVK	14	3	45.614	1498.77	DIIAIAARDSVVILGG	GGPDWDVKLGRRDSKT	132	145	yes	yes	2	0.014763		R	D	S	V	K	L	0	0	0	3	0	0	0	2	0	1	1	1	0	0	1	1	0	1	0	3	0	0	8093800	1732900	3576500	2100800	0	0
D7SJL8	tr|D7SJL8|D7SJL8_VITVI	GLNVIDNIK	9	3	71.451	984.56	VPNKNSIRGLNVIDNI	LNVIDNIKSQVESVCP	101	109	yes	yes	2	0.0070222		R	G	L	I	K	S	0	0	2	1	0	0	0	1	0	2	1	1	0	0	0	0	0	0	0	1	0	0	9683400	2514500	3904300	3264600	0	0
D7SJL8	tr|D7SJL8|D7SJL8_VITVI	TFTSDFVAGMIK	12	1	41.242	1315.65	KTYVNNPKTFTSDFVA	DFVAGMIKMGDITPLT	288	299	yes	yes	2	0.044463		K	T	F	I	K	M	1	0	0	1	0	0	0	1	0	1	0	1	1	2	0	1	2	0	0	1	0	0	2053500	0	1067100	986340	0	0
D7SJM2	tr|D7SJM2|D7SJM2_VITVI	DVDVNQLVSLR	11	1	59.155	1256.67	FKLKSVGRDVDVNQLV	VNQLVSLREAQLSCLL	308	318	yes	yes	2	0.00962		R	D	V	L	R	E	0	1	1	2	0	1	0	0	0	0	2	0	0	0	0	1	0	0	0	3	0	0	49615000	5605800	3234000	0	14416000	7567400
D7SJM2	tr|D7SJM2|D7SJM2_VITVI	EAAMSIASTAVR	12	4	82.85	1205.61	AHGLRLTREAAMSIAS	SIASTAVRKIFMNYVK	594	605	yes	yes	2	0.00054451	315	R	E	A	V	R	K	4	1	0	0	0	0	1	0	0	1	0	0	1	0	0	2	1	0	0	1	0	0	58312000	0	1649400	0	0	0
D7SJM2	tr|D7SJM2|D7SJM2_VITVI	ELSGIQPLVDSLSPPLR	17	14	115.56	1820	SDVFGGRRELSGIQPL	DSLSPPLRLVSSALIV	69	85	yes	yes	2	5.5918e-21		R	E	L	L	R	L	0	1	0	1	0	1	1	1	0	1	4	0	0	0	3	3	0	0	0	1	0	0	81955000	0	0	0	16805000	10149000
D7SJM2	tr|D7SJM2|D7SJM2_VITVI	GATQVVEELNK	11	0	88.155	1186.62	KSRTRAVRGATQVVEE	QVVEELNKALAFNNLL	363	373	yes	yes	2	0.00010492		R	G	A	N	K	A	1	0	1	0	0	1	2	1	0	0	1	1	0	0	0	0	1	0	0	2	0	0	28843000	0	0	0	10168000	5411700
D7SJM2	tr|D7SJM2|D7SJM2_VITVI	LSNSLIQAVSLLR	13	18	127.27	1412.84	VHELARTRLSNSLIQA	IQAVSLLRQRNSSGVV	909	921	yes	yes	2	1.3815e-18		R	L	S	L	R	Q	1	1	1	0	0	1	0	0	0	1	4	0	0	0	0	3	0	0	0	1	0	0	117090000	1151700	2902800	1311100	22374000	12222000
D7SJS6	tr|D7SJS6|D7SJS6_VITVI	DTQPGLLR	8	7	75.109	898.487	YKVPRLPKDTQPGLLR	DTQPGLLRAKTASKKL	286	293	yes	yes	2	0.0095687		K	D	T	L	R	A	0	1	0	1	0	1	0	1	0	0	2	0	0	0	1	0	1	0	0	0	0	0	125100000	1809700	2182200	657180	26206000	22347000
D7SJS6	tr|D7SJS6|D7SJS6_VITVI	DVALAHILVYENK	13	11	161.21	1483.8	FMGSVHVKDVALAHIL	HILVYENKSASGRHLC	237	249	yes	yes	2;3	1.0306e-43		K	D	V	N	K	S	2	0	1	1	0	0	1	0	1	1	2	1	0	0	0	0	0	0	1	2	0	0	122640000	0	0	1003200	17912000	9990000
D7SJS6	tr|D7SJS6|D7SJS6_VITVI	HLEALEGADSR	11	5	118.9	1196.58	LKDERETKHLEALEGA	ALEGADSRLRLFQIDV	53	63	yes	yes	2	3.0077e-10		K	H	L	S	R	L	2	1	0	1	0	0	2	1	1	0	2	0	0	0	0	1	0	0	0	0	0	0	12151000	2473500	2786100	0	0	0
D7SJS6	tr|D7SJS6|D7SJS6_VITVI	LMDLGLQFIPMEQIIK	16	1	74.428	1888.02	RAKTASKKLMDLGLQF	IPMEQIIKDSVESLRS	301	316	yes	yes	2	0.00020512		K	L	M	I	K	D	0	0	0	1	0	2	1	1	0	3	3	1	2	1	1	0	0	0	0	0	0	0	19722000	0	0	0	5609600	5321500
D7SJS6	tr|D7SJS6|D7SJS6_VITVI	VVVTSSISAIIPSPNWPADVVK	22	1	26.361	2278.26	AKELGVGRVVVTSSIS	NWPADVVKGEDCWTDT	129	150	yes	yes	2	0.039726		R	V	V	V	K	G	2	0	1	1	0	0	0	0	0	3	0	1	0	0	3	4	1	1	0	5	0	0	0	0	0	0	0	0
D7SJS6	tr|D7SJS6|D7SJS6_VITVI	AAWEFAK	7	9	76.035	821.407	LSKTLAEKAAWEFAKE	KAAWEFAKEKGLDVVV	178	184	yes	no	2	0.034895		K	A	A	A	K	E	3	0	0	0	0	0	1	0	0	0	0	1	0	1	0	0	0	1	0	0	0	0	130810000	0	0	0	17689000	16872000
D7SJS8	tr|D7SJS8|D7SJS8_VITVI	LIVTDPDSVLNSLTR	15	9	121.99	1641.89	AHAFEAFKLIVTDPDS	SVLNSLTREIKEIGPD	151	165	yes	yes	2;3	6.5517e-22		K	L	I	T	R	E	0	1	1	2	0	0	0	0	0	1	3	0	0	0	1	2	2	0	0	2	0	0	154830000	1348900	981220	1228400	51504000	17627000
D7SJV3	tr|D7SJV3|D7SJV3_VITVI	AAANAPISMK	10	3	62.166	972.506	________________	ANAPISMKEALTLSSI	2	11	yes	yes	2	0.0027829		M	A	A	M	K	E	4	0	1	0	0	0	0	0	0	1	0	1	1	0	1	1	0	0	0	0	0	0	8739100	0	0	0	0	0
D7SJV3	tr|D7SJV3|D7SJV3_VITVI	AAENANVYHDLVR	13	51	200.19	1470.72	TQFLDVIRAAENANVY	NVYHDLVRYLLMVRQK	1157	1169	yes	yes	2;3	5.1275e-92		R	A	A	V	R	Y	3	1	2	1	0	0	1	0	1	0	1	0	0	0	0	0	0	0	1	2	0	0	1711500000	33879000	36515000	24048000	260150000	242350000
D7SJV3	tr|D7SJV3|D7SJV3_VITVI	ANLQIIVQTAK	11	16	147.91	1197.71	DLLLVNLRANLQIIVQ	QIIVQTAKEYSEQLGV	691	701	yes	yes	2	2.0331e-20		R	A	N	A	K	E	2	0	1	0	0	2	0	0	0	2	1	1	0	0	0	0	1	0	0	1	0	0	282050000	6007900	0	0	0	18060000
D7SJV3	tr|D7SJV3|D7SJV3_VITVI	AQLKEGLVSDAIESFIR	17	2	51.798	1875.01	AVWSQVAKAQLKEGLV	DAIESFIRADDATQFL	1128	1144	yes	yes	3	0.0012582		K	A	Q	I	R	A	2	1	0	1	0	1	2	1	0	2	2	1	0	1	0	2	0	0	0	1	0	1	8117100	0	0	0	4327700	0
D7SJV3	tr|D7SJV3|D7SJV3_VITVI	EAAELAAESPQGLLR	15	2	82.529	1553.8	LFAQTKYKEAAELAAE	ESPQGLLRTPDTVAKF	392	406	yes	yes	2	1.5923e-07		K	E	A	L	R	T	4	1	0	0	0	1	3	1	0	0	3	0	0	0	1	1	0	0	0	0	0	0	93655000	3630000	5129600	3312400	29063000	9918500
D7SJV3	tr|D7SJV3|D7SJV3_VITVI	EATAFLLDVLKPNLPEHGFLQSK	23	20	166.49	2566.38	FLQRNLIREATAFLLD	EHGFLQSKVLEINLVT	575	597	yes	yes	3;4	1.8427e-126		R	E	A	S	K	V	2	0	1	1	0	1	2	1	1	0	5	2	0	2	2	1	1	0	0	1	0	1	204220000	0	0	0	20481000	26078000
D7SJV3	tr|D7SJV3|D7SJV3_VITVI	ELAEELLVYFIEQK	14	8	106.14	1722.91	TCSQSGDRELAEELLV	LVYFIEQKKKECFASC	1562	1575	yes	yes	2;3	8.6236e-09		R	E	L	Q	K	K	1	0	0	0	0	1	4	0	0	1	3	1	0	1	0	0	0	0	1	1	0	0	36701000	0	0	0	9409300	6731000
D7SJV3	tr|D7SJV3|D7SJV3_VITVI	ETAPQNSVVIIDMSMPMQPLR	21	2	21.901	2356.16	SDKYICVRETAPQNSV	SMPMQPLRRPITADSA	43	63	yes	yes	2	0.058356		R	E	T	L	R	R	1	1	1	1	0	2	1	0	0	2	1	0	3	0	3	2	1	0	0	2	0	0	15894000	0	0	0	0	6117800
D7SJV3	tr|D7SJV3|D7SJV3_VITVI	FQSVPVQSGQTPPLLQYFGTLLTR	24	6	31.599	2676.43	RTPDTVAKFQSVPVQS	YFGTLLTRGKLNAFES	414	437	yes	yes	3	0.0012846		K	F	Q	T	R	G	0	1	0	0	0	4	0	2	0	0	4	0	0	2	3	2	3	0	1	2	0	0	13359000	0	0	0	3615700	2909500
D7SJV3	tr|D7SJV3|D7SJV3_VITVI	GNMQLFSVDQQR	12	13	138.45	1421.67	PERPQLVKGNMQLFSV	LFSVDQQRSQALEAHA	189	200	yes	yes	2	1.9671e-16	316	K	G	N	Q	R	S	0	1	1	1	0	3	0	1	0	0	1	0	1	1	0	1	0	0	0	1	0	0	53847000	1475200	0	0	9241800	7119500
D7SJV3	tr|D7SJV3|D7SJV3_VITVI	ISPDPIFLTAEASSIGGFYAINR	23	37	106.57	2438.25	ASAVYRNRISPDPIFL	GGFYAINRRGQVLLAT	311	333	yes	yes	2;3	8.2811e-35		R	I	S	N	R	R	3	1	1	1	0	0	1	2	0	4	1	0	0	2	2	3	1	0	1	0	0	0	359320000	6892100	7514400	3679000	78393000	46134000
D7SJV3	tr|D7SJV3|D7SJV3_VITVI	ISPDPIFLTAEASSIGGFYAINRR	24	1	30.597	2594.35	ASAVYRNRISPDPIFL	GFYAINRRGQVLLATV	311	334	yes	yes	3	0.0001495		R	I	S	R	R	G	3	2	1	1	0	0	1	2	0	4	1	0	0	2	2	3	1	0	1	0	0	1	0	0	0	0	0	0
D7SJV3	tr|D7SJV3|D7SJV3_VITVI	LGDIEEFILMPNVANLQNVGDR	22	72	149.33	2456.24	YAYAKIDRLGDIEEFI	NLQNVGDRLYDEALYE	1197	1218	yes	yes	2;3	1.0563e-81	317	R	L	G	D	R	L	1	1	3	2	0	1	2	2	0	2	3	0	1	1	1	0	0	0	0	2	0	0	902670000	11437000	9759500	6946500	114410000	70645000
D7SJV3	tr|D7SJV3|D7SJV3_VITVI	LHVIELGAQPGKPGFTK	17	5	88.385	1791	NAGQITSKLHVIELGA	PGKPGFTKKQADLFFP	242	258	yes	yes	2;3	1.0112e-07		K	L	H	T	K	K	1	0	0	0	0	1	1	3	1	1	2	2	0	1	2	0	1	0	0	1	0	1	53567000	0	0	0	6252300	0
D7SJV3	tr|D7SJV3|D7SJV3_VITVI	MLGLVTQTSVFHWSIEGDSEPVK	23	3	39.68	2559.27	FWKWITPKMLGLVTQT	EGDSEPVKMFERTANL	124	146	yes	yes	3	0.00024198		K	M	L	V	K	M	0	0	0	1	0	1	2	2	1	1	2	1	1	1	1	3	2	1	0	3	0	0	14103000	0	0	0	0	4820200
D7SJV3	tr|D7SJV3|D7SJV3_VITVI	RPITADSALMNPNSR	15	23	101.78	1641.83	SMPMQPLRRPITADSA	ALMNPNSRILALKAQL	64	78	yes	yes	2;3	4.1491e-11	318	R	R	P	S	R	I	2	2	2	1	0	0	0	0	0	1	1	0	1	0	2	2	1	0	0	0	0	1	388270000	4766000	5107700	6233100	64054000	63689000
D7SJV3	tr|D7SJV3|D7SJV3_VITVI	SQALEAHAASFASFK	15	7	33.36	1563.77	LFSVDQQRSQALEAHA	AASFASFKVLGNENPS	201	215	yes	yes	3	0.010118		R	S	Q	F	K	V	5	0	0	0	0	1	1	0	1	0	1	1	0	2	0	3	0	0	0	0	0	0	91929000	2121000	4207700	3473600	34441000	6019000
D7SJV3	tr|D7SJV3|D7SJV3_VITVI	VLSPDNEYR	9	2	79.148	1091.52	MDADLWEKVLSPDNEY	LSPDNEYRRQLIDQVV	973	981	yes	yes	2	0.0050778		K	V	L	Y	R	R	0	1	1	1	0	0	1	0	0	0	1	0	0	0	1	1	0	0	1	1	0	0	92858000	0	0	0	25876000	30326000
D7SJV3	tr|D7SJV3|D7SJV3_VITVI	YKEAAELAAESPQGLLR	17	4	76.301	1844.96	QELFAQTKYKEAAELA	ESPQGLLRTPDTVAKF	390	406	yes	yes	2;3	6.5477e-05		K	Y	K	L	R	T	4	1	0	0	0	1	3	1	0	0	3	1	0	0	1	1	0	0	1	0	0	1	56339000	2079400	1368800	3213700	28747000	0
D7SJW3	tr|D7SJW3|D7SJW3_VITVI	YLAEQLNR	8	4	71.877	1005.52	QVAERQGKYLAEQLNR	YLAEQLNRIGKAGGGY	397	404	yes	yes	2	0.011977		K	Y	L	N	R	I	1	1	1	0	0	1	1	0	0	0	2	0	0	0	0	0	0	0	1	0	0	0	71866000	0	0	0	1306900	6610000
D7SJW3	tr|D7SJW3|D7SJW3_VITVI	IGIDEWLR	8	7	143.61	1000.53	VPKSPGGRIGIDEWLR	IGIDEWLRVPSAQDIF	352	359	yes	no	2	5.8621e-06		R	I	G	L	R	V	0	1	0	1	0	0	1	1	0	2	1	0	0	0	0	0	0	1	0	0	0	0	48935000	0	856380	0	11804000	0
D7SJX7	tr|D7SJX7|D7SJX7_VITVI	ANAAVLTSPGPR	12	7	84.169	1152.63	SLKLFLLRANAAVLTS	VLTSPGPRQGSSNDDW	305	316	yes	yes	2	0.00037769		R	A	N	P	R	Q	3	1	1	0	0	0	0	1	0	0	1	0	0	0	2	1	1	0	0	1	0	0	12684000	2769500	4067600	3434300	0	0
D7SJX8	tr|D7SJX8|D7SJX8_VITVI	VVMGLFGK	8	11	58.782	849.478	IDGKPAGRVVMGLFGK	VVMGLFGKTVPKTVEN	47	54	yes	yes	2	0.0097835	320	R	V	V	G	K	T	0	0	0	0	0	0	0	2	0	0	1	1	1	1	0	0	0	0	0	2	0	0	243740000	995040	0	339120	25710000	12460000
D7SJX8	tr|D7SJX8|D7SJX8_VITVI	VYFDVEIDGKPAGR	14	4	50.102	1564.79	NLKEVTHKVYFDVEID	IDGKPAGRVVMGLFGK	33	46	yes	yes	3	0.0037776		K	V	Y	G	R	V	1	1	0	2	0	0	1	2	0	1	0	1	0	1	1	0	0	0	1	2	0	1	6190800	0	0	0	0	0
D7SJX8	tr|D7SJX8|D7SJX8_VITVI	IIPSFMIQGGDFTLGDGR	18	32	120.9	1922.96	FKGSAFHRIIPSFMIQ	DFTLGDGRGGESIYGE	90	107	yes	no	2;3	1.6196e-29	319	R	I	I	G	R	G	0	1	0	2	0	1	0	4	0	3	1	0	1	2	1	1	1	0	0	0	0	0	265680000	6922600	8299400	3929100	37392000	33355000
D7SJY4	tr|D7SJY4|D7SJY4_VITVI	AELPNFGR	8	2	52.937	902.461	SLIERVVKAELPNFGR	AELPNFGREGIRVSVI	79	86	yes	yes	2	0.029898		K	A	E	G	R	E	1	1	1	0	0	0	1	1	0	0	1	0	0	1	1	0	0	0	0	0	0	0	66661000	0	0	0	5419200	4877800
D7SJY4	tr|D7SJY4|D7SJY4_VITVI	SEGEVGFLMSLIER	14	1	64.52	1565.78	FSYDNWSRSEGEVGFL	FLMSLIERVVKAELPN	62	75	yes	yes	2	0.001568		R	S	E	E	R	V	0	1	0	0	0	0	3	2	0	1	2	0	1	1	0	2	0	0	0	1	0	0	54839000	0	0	0	4004300	0
D7SK01	tr|D7SK01|D7SK01_VITVI	ANDVAEIKPEQLSEADGFLFGFPSR	25	2	33.263	2736.34	EKMKAPPKANDVAEIK	FLFGFPSRFGMMPAQF	59	83	yes	yes	3	9.7834e-05		K	A	N	S	R	F	3	1	1	2	0	1	3	2	0	1	2	1	0	3	2	2	0	0	0	1	0	1	0	0	0	0	0	0
D7SK19	tr|D7SK19|D7SK19_VITVI	DLVDSDESANSIR	13	2	64.104	1419.65	GVLRFPIKDLVDSDES	DESANSIRTLELRRPS	111	123	yes	yes	2	0.0020251		K	D	L	I	R	T	1	1	1	3	0	0	1	0	0	1	1	0	0	0	0	3	0	0	0	1	0	0	18022000	0	0	0	0	0
D7SK19	tr|D7SK19|D7SK19_VITVI	ERPPPTPDYHIAPQSSYYYSSAPPPPPPAR	30	12	113.15	3334.6	IRIKLALRERPPPTPD	PPPPPPARDYRGFSSS	146	175	yes	yes	3;4	3.6705e-65		R	E	R	A	R	D	3	2	0	1	0	1	1	0	1	1	0	0	0	0	11	4	1	0	4	0	0	1	125060000	0	0	0	15243000	12730000
D7SK19	tr|D7SK19|D7SK19_VITVI	FPIKDLVDSDESANSIR	17	16	133.32	1904.95	KPLVGVLRFPIKDLVD	DESANSIRTLELRRPS	107	123	yes	yes	2;3	1.1473e-37		R	F	P	I	R	T	1	1	1	3	0	0	1	0	0	2	1	1	0	1	1	3	0	0	0	1	0	1	126620000	867400	0	0	10372000	7972100
D7SK19	tr|D7SK19|D7SK19_VITVI	IQPPPPPPQSK	11	1	47.062	1184.66	________________	PPPPPQSKLMDLDVTI	6	16	yes	yes	2	0.03166		R	I	Q	S	K	L	0	0	0	0	0	2	0	0	0	1	0	1	0	0	6	1	0	0	0	0	0	0	173280000	1012700	0	0	12006000	9597500
D7SK19	tr|D7SK19|D7SK19_VITVI	LMDLDVTIVSAK	12	0	41.227	1303.71	PPPPPQSKLMDLDVTI	DVTIVSAKHLKNVNWR	17	28	yes	yes	2	0.064154		K	L	M	A	K	H	1	0	0	2	0	0	0	0	0	1	2	1	1	0	0	1	1	0	0	2	0	0	7497500	0	0	0	0	1492500
D7SK19	tr|D7SK19|D7SK19_VITVI	PLVGVLR	7	6	84.359	752.491	SKPSETPKPLVGVLRF	KPLVGVLRFPIKDLVD	100	106	yes	yes	2	0.020039		K	P	L	L	R	F	0	1	0	0	0	0	0	1	0	0	2	0	0	0	1	0	0	0	0	2	0	0	55214000	0	0	0	5956000	0
D7SK19	tr|D7SK19|D7SK19_VITVI	VADRVENDLSAR	12	1	50.222	1343.68	GIKYEEEKVADRVEND	VENDLSARDDYSDYHR	293	304	yes	yes	3	0.0073709		K	V	A	A	R	D	2	2	1	2	0	0	1	0	0	0	1	0	0	0	0	1	0	0	0	2	0	1	15562000	0	0	0	4857600	4689900
D7SK27	tr|D7SK27|D7SK27_VITVI	IIVPVAR	7	6	79.454	766.507	FWVPIYDRIIVPVARK	RIIVPVARKFTGHSNG	392	398	yes	yes	2	0.02725		R	I	I	A	R	K	1	1	0	0	0	0	0	0	0	2	0	0	0	0	1	0	0	0	0	2	0	0	56651000	0	0	0	6536300	7933300
D7SK27	tr|D7SK27|D7SK27_VITVI	SLLYEIADGESGIQGSR	17	2	62.203	1793.88	RVQVPADKSLLYEIAD	ESGIQGSRKLDHTKDL	268	284	yes	yes	2	0.00051814		K	S	L	S	R	K	1	1	0	1	0	1	2	3	0	2	2	0	0	0	0	3	0	0	1	0	0	0	9108600	0	0	0	0	966410
D7SK33	tr|D7SK33|D7SK33_VITVI	AELFADYVSIWPTK	14	3	46.89	1638.83	QLHSDILKAELFADYV	YVSIWPTKFQNKTNGI	470	483	yes	yes	2	0.011285		K	A	E	T	K	F	2	0	0	1	0	0	1	0	0	1	1	1	0	1	1	1	1	1	1	1	0	0	26642000	0	0	0	0	7817000
D7SK33	tr|D7SK33|D7SK33_VITVI	ALTNAIGNLNIQDAYADALNK	21	1	45.423	2202.13	SMEYLQGRALTNAIGN	AYADALNKLGHGLEEI	100	120	yes	yes	2	0.00084506		R	A	L	N	K	L	5	0	4	2	0	1	0	1	0	2	3	1	0	0	0	0	1	0	1	0	0	0	8082300	0	0	0	8082300	0
D7SK33	tr|D7SK33|D7SK33_VITVI	DGGSWQWSEFPSK	13	1	39.961	1509.65	IFRFKERKDGGSWQWS	QWSEFPSKVAVQLNDT	324	336	yes	yes	2	0.041063		K	D	G	S	K	V	0	0	0	1	0	1	1	2	0	0	0	1	0	1	1	3	0	2	0	0	0	0	15792000	0	0	0	0	0
D7SK33	tr|D7SK33|D7SK33_VITVI	FFGHVAVSPSGSR	13	16	86.592	1346.67	HDVVFPVRFFGHVAVS	AVSPSGSRKWIGGEVM	208	220	yes	yes	3	4.7284e-05		R	F	F	S	R	K	1	1	0	0	0	0	0	2	1	0	0	0	0	2	1	3	0	0	0	2	0	0	155910000	3193000	2745600	1572500	15416000	18341000
D7SK33	tr|D7SK33|D7SK33_VITVI	FSDNEEFQAEWASAK	15	2	70.197	1757.75	DKLANLRKFSDNEEFQ	QAEWASAKMANKQRLA	530	544	yes	yes	2	0.0007756		K	F	S	A	K	M	3	0	1	1	0	1	3	0	0	0	0	1	0	2	0	2	0	1	0	0	0	0	5405400	0	0	0	0	0
D7SK33	tr|D7SK33|D7SK33_VITVI	FSPWEVVR	8	6	105.14	1018.52	IAEDWLEKFSPWEVVR	FSPWEVVRHDVVFPVR	192	199	yes	yes	2	0.0050876		K	F	S	V	R	H	0	1	0	0	0	0	1	0	0	0	0	0	0	1	1	1	0	1	0	2	0	0	158820000	0	2932100	0	15709000	16765000
D7SK33	tr|D7SK33|D7SK33_VITVI	HDVVFPVR	8	19	126.52	967.524	FSPWEVVRHDVVFPVR	HDVVFPVRFFGHVAVS	200	207	yes	yes	2	1.2481e-05		R	H	D	V	R	F	0	1	0	1	0	0	0	0	1	0	0	0	0	1	1	0	0	0	0	3	0	0	364780000	5577200	6789400	3349300	60387000	38339000
D7SK33	tr|D7SK33|D7SK33_VITVI	HMEIIEEIDKR	11	0	49.28	1411.71	VMWKLLPRHMEIIEEI	IIEEIDKRFITMIRSS	403	413	yes	yes	3	0.0045825		R	H	M	K	R	F	0	1	0	1	0	0	3	0	1	3	0	1	1	0	0	0	0	0	0	0	0	1	40979000	0	0	0	12863000	9036500
D7SK33	tr|D7SK33|D7SK33_VITVI	LAQYILQVTGESIDPNSLFDIQVK	24	1	18.545	2690.42	AKMANKQRLAQYILQV	SLFDIQVKRIHEYKRQ	551	574	yes	yes	3	0.026063		R	L	A	V	K	R	1	0	1	2	0	3	1	1	0	3	3	1	0	1	1	2	1	0	1	2	0	0	4790800	0	0	0	0	0
D7SK33	tr|D7SK33|D7SK33_VITVI	LLMDDEGLAWDEAWDVTSR	19	1	71.592	2221	LAIPELMRLLMDDEGL	EAWDVTSRTIAYTNHT	356	374	yes	yes	2	9.7672e-09		R	L	L	S	R	T	2	1	0	4	0	0	2	1	0	0	3	0	1	0	0	1	1	2	0	1	0	0	44909000	0	1747200	0	11821000	10058000
D7SK33	tr|D7SK33|D7SK33_VITVI	LVNDVGAVVNTDPEVNEYLK	20	3	69.747	2187.11	TNAKRIVKLVNDVGAV	PEVNEYLKVVFVPNYN	631	650	yes	yes	2	9.0487e-07		K	L	V	L	K	V	1	0	3	2	0	0	2	1	0	0	2	1	0	0	1	0	1	0	1	5	0	0	23380000	0	0	0	5804500	1843500
D7SK33	tr|D7SK33|D7SK33_VITVI	QLLNILGAIYR	11	22	169.93	1272.76	KRIHEYKRQLLNILGA	NILGAIYRYKKLKEMS	582	592	yes	yes	2	3.4635e-42		R	Q	L	Y	R	Y	1	1	1	0	0	1	0	1	0	2	3	0	0	0	0	0	0	0	1	0	0	0	596200000	0	0	0	36262000	11743000
D7SK33	tr|D7SK33|D7SK33_VITVI	TDEWVTNLDK	10	8	110.84	1219.57	NIISKWLKTDEWVTNL	EWVTNLDKLANLRKFS	514	523	yes	yes	2	8.8534e-08		K	T	D	D	K	L	0	0	1	2	0	0	1	0	0	0	1	1	0	0	0	0	2	1	0	1	0	0	88495000	0	0	0	0	0
D7SK33	tr|D7SK33|D7SK33_VITVI	TIAYTNHTVLPEALEK	16	2	42.321	1798.95	EAWDVTSRTIAYTNHT	VLPEALEKWSQVVMWK	375	390	yes	yes	2	0.0061719		R	T	I	E	K	W	2	0	1	0	0	0	2	0	1	1	2	1	0	0	1	0	3	0	1	1	0	0	8392800	0	0	0	0	4873600
D7SK33	tr|D7SK33|D7SK33_VITVI	VAVQLNDTHPTLAIPELMR	19	3	56.081	2117.13	QWSEFPSKVAVQLNDT	LAIPELMRLLMDDEGL	337	355	yes	yes	3	1.0247e-08		K	V	A	M	R	L	2	1	1	1	0	1	1	0	1	1	3	0	1	0	2	0	2	0	0	2	0	0	6023100	993590	0	0	0	0
D7SK46	tr|D7SK46|D7SK46_VITVI	FGEPVFDAFLGHPR	14	1	72.681	1587.78	RNIPGQLRFGEPVFDA	DAFLGHPRMGELSGPG	1511	1524	yes	yes	3	0.00022511		R	F	G	P	R	M	1	1	0	1	0	0	1	2	1	0	1	0	0	3	2	0	0	0	0	1	0	0	16514000	0	0	0	0	0
D7SK46	tr|D7SK46|D7SK46_VITVI	FPVLPSHLR	9	1	61.09	1064.61	NLPSDESRFPVLPSHL	PVLPSHLRRGELEGPG	1446	1454	yes	yes	3	0.0030477		R	F	P	L	R	R	0	1	0	0	0	0	0	0	1	0	2	0	0	1	2	1	0	0	0	1	0	0	6760200	0	0	0	0	0
D7SK46	tr|D7SK46|D7SK46_VITVI	GFVPLPHPVPILDGGR	16	0	24.467	1669.93	PPSQVQGRGFVPLPHP	VPILDGGRHQPPPMQY	1009	1024	yes	yes	3	0.056951		R	G	F	G	R	H	0	1	0	1	0	0	0	3	1	1	2	0	0	1	4	0	0	0	0	2	0	0	3398600	0	0	0	0	0
D7SK53	tr|D7SK53|D7SK53_VITVI	LLVAEFMPNETLSK	14	1	35.037	1590.83	CCCEGEERLLVAEFMP	MPNETLSKHLFHWEAQ	128	141	yes	yes	2	0.067181		R	L	L	S	K	H	1	0	1	0	0	0	2	0	0	0	3	1	1	1	1	1	1	0	0	1	0	0	8035800	0	0	0	0	0
D7SK53	tr|D7SK53|D7SK53_VITVI	ALYHDLNAYR	10	33	130.41	1234.61	EYCSSKGRALYHDLNA	YHDLNAYRVLFDQDGN	176	185	no	no	2;3	1.6075e-08		R	A	L	Y	R	V	2	1	1	1	0	0	0	0	1	0	2	0	0	0	0	0	0	0	2	0	0	0	540770000	4863300	5767600	3083000	58807000	48184000
D7SK53	tr|D7SK53|D7SK53_VITVI	SYSTNLAFTPPEYLR	15	3	105.14	1757.86	MKNSRDGKSYSTNLAF	FTPPEYLRTGRVTAES	210	224	no	no	2	5.4728e-11		K	S	Y	L	R	T	1	1	1	0	0	0	1	0	0	0	2	0	0	1	2	2	2	0	2	0	0	0	74924000	0	0	0	12151000	0
D7SK53	tr|D7U4X1|D7U4X1_VITVI	HIPPSHALDLIR	12	1	51.612	1367.77	LLDLLSGKHIPPSHAL	SHALDLIRDKNIILLM	255	266	no	no	3	0.002138		K	H	I	I	R	D	1	1	0	1	0	0	0	0	2	2	2	0	0	0	2	1	0	0	0	0	0	0	0	0	0	0	0	0
D7SK53	tr|D7SK53|D7SK53_VITVI	VLFDQDGNPR	10	19	123.6	1159.56	YHDLNAYRVLFDQDGN	FDQDGNPRLSCFGLMK	186	195	yes	no	2	3.8318e-07		R	V	L	P	R	L	0	1	1	2	0	1	0	1	0	0	1	0	0	1	1	0	0	0	0	1	0	0	407020000	0	4805600	4642100	45761000	27385000
D7SK62	tr|D7SK62|D7SK62_VITVI	NLLWSATGSPLIPLEEFR	18	3	77.554	2042.08	PSQGDESRNLLWSATG	LIPLEEFRDLDVAQKY	50	67	yes	yes	2	1.5574e-06		R	N	L	F	R	D	1	1	1	0	0	0	2	1	0	1	4	0	0	1	2	2	1	1	0	0	0	0	21522000	0	0	0	0	8730600
D7SKB2	tr|D7SKB2|D7SKB2_VITVI	GLAYDVSDDQQDITR	15	1	52.008	1694.77	QTEKDRWKGLAYDVSD	DDQQDITRGKGMVDSL	73	87	yes	yes	2	0.004689		K	G	L	T	R	G	1	1	0	4	0	2	0	1	0	1	1	0	0	0	0	1	1	0	1	1	0	0	0	0	0	0	0	0
D7SKB2	tr|D7SKB2|D7SKB2_VITVI	YLSEAALGDANVDSIER	17	2	67.645	1821.87	KRVQLADKYLSEAALG	ANVDSIERGTFYGKAA	416	432	yes	yes	2	0.00013523		K	Y	L	E	R	G	3	1	1	2	0	0	2	1	0	1	2	0	0	0	0	2	0	0	1	1	0	0	31929000	0	2711900	1628300	8993000	0
D7SKD8	tr|D7SKD8|D7SKD8_VITVI	FLGNFLDVYPVGR	13	8	127.17	1495.78	VTSKLKTKFLGNFLDV	LDVYPVGRTRVTLKRD	196	208	yes	yes	2	1.399e-18		K	F	L	G	R	T	0	1	1	1	0	0	0	2	0	0	2	0	0	2	1	0	0	0	1	2	0	0	175390000	1490600	0	680930	19143000	15579000
D7SKD8	tr|D7SKD8|D7SKD8_VITVI	INSFDTAPR	9	1	51.762	1019.5	QYTHFAHKINSFDTAP	NSFDTAPRKLLASDSR	337	345	yes	yes	2	0.034546		K	I	N	P	R	K	1	1	1	1	0	0	0	0	0	1	0	0	0	1	1	1	1	0	0	0	0	0	10371000	0	0	0	0	8727000
D7SKD8	tr|D7SKD8|D7SKD8_VITVI	MAELMEYSHLLDK	13	2	58.116	1578.74	EPMTMLQKMAELMEYS	EYSHLLDKADECEDPY	101	113	yes	yes	3	0.00087517		K	M	A	D	K	A	1	0	0	1	0	0	2	0	1	0	3	1	2	0	0	1	0	0	1	0	0	0	10335000	0	0	0	4121900	0
D7SKD8	tr|D7SKD8|D7SKD8_VITVI	YEVDGYVYNAEEEPK	15	0	50.305	1803.78	CGWFGAGRYEVDGYVY	YNAEEEPKILMTGKWN	271	285	yes	yes	2	0.013453		R	Y	E	P	K	I	1	0	1	1	0	0	4	1	0	0	0	1	0	0	1	0	0	0	3	2	0	0	5307900	0	0	0	3569200	0
D7SKD8	tr|D7SKD8|D7SKD8_VITVI	VNNLIFGR	8	4	97.093	931.524	DLVPPPTKVNNLIFGR	VNNLIFGRTWVDSPGE	229	236	no	no	2	0.0067783		K	V	N	G	R	T	0	1	2	0	0	0	0	1	0	1	1	0	0	1	0	0	0	0	0	1	0	0	172190000	2018500	1716100	0	21293000	14040000
D7SKE9	tr|D7SKE9|D7SKE9_VITVI	ESGSTMAVVAAQTK	14	1	53.168	1378.68	VGETLEQRESGSTMAV	AVVAAQTKAIAEKVSS	136	149	yes	yes	2	0.0056885		R	E	S	T	K	A	3	0	0	0	0	1	1	1	0	0	0	1	1	0	0	2	2	0	0	2	0	0	36703000	0	0	0	0	0
D7SKE9	tr|D7SKE9|D7SKE9_VITVI	SLLAESNEFVGDK	13	9	110.92	1407.69	ILGHSERRSLLAESNE	SNEFVGDKVAYALSQG	101	113	yes	yes	2	1.22e-08		R	S	L	D	K	V	1	0	1	1	0	0	2	1	0	0	2	1	0	1	0	2	0	0	0	1	0	0	234170000	0	0	7462300	39959000	37955000
D7SKE9	tr|D7SKE9|D7SKE9_VITVI	VAYALSQGLK	10	5	78.759	1048.59	SNEFVGDKVAYALSQG	YALSQGLKVIACVGET	114	123	yes	yes	2	0.0026009		K	V	A	L	K	V	2	0	0	0	0	1	0	1	0	0	2	1	0	0	0	1	0	0	1	1	0	0	151850000	0	0	0	56729000	21954000
D7SKE9	tr|D7SKE9|D7SKE9_VITVI	VSSWDNIVLAYEPVWAIGTGK	21	17	77.221	2304.18	QTKAIAEKVSSWDNIV	VWAIGTGKVATPAQAQ	155	175	yes	yes	2;3	1.7727e-12		K	V	S	G	K	V	2	0	1	1	0	0	1	2	0	2	1	1	0	0	1	2	1	2	1	3	0	0	111020000	0	0	0	17322000	15593000
D7SKE9	tr|D7SKE9|D7SKE9_VITVI	WLHDNAGDEVAASTR	15	7	76.82	1640.75	EVHCELRKWLHDNAGD	DEVAASTRIIYGGSVN	192	206	yes	yes	2	0.00039942		K	W	L	T	R	I	3	1	1	2	0	0	1	1	1	0	1	0	0	0	0	1	1	1	0	1	0	0	68445000	0	0	0	10921000	9658000
D7SKJ3	tr|D7SKJ3|D7SKJ3_VITVI	DMILSGEEDVISPVEER	17	1	38.227	1916.9	LEVDDRARDMILSGEE	VISPVEERSESKLCFY	55	71	yes	yes	2	0.013054		R	D	M	E	R	S	0	1	0	2	0	0	4	1	0	2	1	0	1	0	1	2	0	0	0	2	0	0	9649400	0	0	0	0	0
D7SKJ3	tr|D7SKJ3|D7SKJ3_VITVI	YLLEEVALVPTR	12	5	74.987	1401.79	MRFQSLFRYLLEEVAL	EVALVPTRLNKIAPQA	164	175	yes	yes	2	0.00063181		R	Y	L	T	R	L	1	1	0	0	0	0	2	0	0	0	3	0	0	0	1	0	1	0	1	2	0	0	72642000	0	0	0	6075900	0
D7SKK6	tr|D7SKK6|D7SKK6_VITVI	INQPDQASGVGQTAQK	16	11	190.82	1640.81	RAEPTAIRINQPDQAS	GVGQTAQKSACCGS__	195	210	yes	yes	2	8.5277e-105		R	I	N	Q	K	S	2	0	1	1	0	4	0	2	0	1	0	1	0	0	1	1	1	0	0	1	0	0	125750000	4776900	5100600	3294200	11958000	13518000
D7SKK6	tr|D7SKK6|D7SKK6_VITVI	TNLNVEEVFFSIAR	14	10	114.64	1637.84	KFFETSAKTNLNVEEV	EVFFSIARDIKQRLAD	162	175	yes	yes	2	6.1925e-12		K	T	N	A	R	D	1	1	2	0	0	0	2	0	0	1	1	0	0	2	0	1	1	0	0	2	0	0	32948000	2436900	1769800	0	11194000	0
D7SKQ2	tr|D7SKQ2|D7SKQ2_VITVI	AVIFSLK	7	1	69.998	776.48	SYTYTFNRAVIFSLKG	RAVIFSLKGDSQNEIN	131	137	yes	yes	2	0.044542		R	A	V	L	K	G	1	0	0	0	0	0	0	0	0	1	1	1	0	1	0	1	0	0	0	1	0	0	4183800	0	0	0	0	0
D7SKQ2	tr|D7SKQ2|D7SKQ2_VITVI	LVPIDLGNRPAWYK	14	3	48.467	1640.9	KGLQDKIKLVPIDLGN	GNRPAWYKEKVYPENK	56	69	yes	yes	3	0.0048209		K	L	V	Y	K	E	1	1	1	1	0	0	0	1	0	1	2	1	0	0	2	0	0	1	1	1	0	1	29552000	0	0	0	0	0
D7SKQ2	tr|D7SKQ2|D7SKQ2_VITVI	YIDSHFEGPSLYPDDPNKR	19	0	30.489	2249.04	GESLDLIKYIDSHFEG	YPDDPNKRQFAEELLS	97	115	yes	yes	3	0.0083446		K	Y	I	K	R	Q	0	1	1	3	0	0	1	1	1	1	1	1	0	1	3	2	0	0	2	0	0	1	9773300	0	0	0	5272900	2225800
D7SKR5	tr|D7SKR5|D7SKR5_VITVI	ALLSDPAFR	9	4	67.897	988.534	LLQLPSDKALLSDPAF	LLSDPAFRPLVEKYAA	210	218	yes	yes	2	0.0087666		K	A	L	F	R	P	2	1	0	1	0	0	0	0	0	0	2	0	0	1	1	1	0	0	0	0	0	0	92282000	2856900	1868900	1663800	13835000	12919000
D7SKR5	tr|D7SKR5|D7SKR5_VITVI	ALLSDPAFRPLVEK	14	38	198.74	1554.88	LLQLPSDKALLSDPAF	AFRPLVEKYAADEDAF	210	223	yes	yes	2;3	4.8587e-104		K	A	L	E	K	Y	2	1	0	1	0	0	1	0	0	0	3	1	0	1	2	1	0	0	0	1	0	1	1153800000	43141000	39370000	47195000	246210000	198430000
D7SKR5	tr|D7SKR5|D7SKR5_VITVI	DIVALSGAHTLGR	13	0	33.842	1308.71	TQMGLSDKDIVALSGA	SGAHTLGRCHKERSGF	155	167	yes	yes	3	0.029598		K	D	I	G	R	C	2	1	0	1	0	0	0	2	1	1	2	0	0	0	0	1	1	0	0	1	0	0	8413800	0	0	0	0	2856800
D7SKR5	tr|D7SKR5|D7SKR5_VITVI	EGLLQLPSDK	10	27	147.91	1098.59	KELLSGEKEGLLQLPS	LLQLPSDKALLSDPAF	200	209	yes	yes	2	1.0998e-14		K	E	G	D	K	A	0	0	0	1	0	1	1	1	0	0	3	1	0	0	1	1	0	0	0	0	0	0	930300000	22748000	19297000	14349000	122700000	260560000
D7SKR5	tr|D7SKR5|D7SKR5_VITVI	ELLSGEKEGLLQLPSDK	17	13	117.3	1854.99	IFDNSYFKELLSGEKE	LLQLPSDKALLSDPAF	193	209	yes	yes	2;3	3.5858e-27		K	E	L	D	K	A	0	0	0	1	0	1	3	2	0	0	5	2	0	0	1	2	0	0	0	0	0	1	149280000	2461500	3891300	3159500	30724000	24855000
D7SKR5	tr|D7SKR5|D7SKR5_VITVI	IAWHSAGTFDVK	12	24	167.84	1330.67	NCAPIMLRIAWHSAGT	SAGTFDVKTRTGGPFG	39	50	yes	yes	2;3	2.8997e-35		R	I	A	V	K	T	2	0	0	1	0	0	0	1	1	1	0	1	0	1	0	1	1	1	0	1	0	0	2902000000	28205000	21217000	16857000	489580000	342020000
D7SKR5	tr|D7SKR5|D7SKR5_VITVI	KPEELAHGANNGLDIAVR	18	47	209.49	1902.99	GGPFGTMKKPEELAHG	NGLDIAVRLLEPIKEQ	62	79	yes	yes	2;3;4	7.8523e-157		K	K	P	V	R	L	3	1	2	1	0	0	2	2	1	1	2	1	0	0	1	0	0	0	0	1	0	1	697170000	21904000	17738000	7770400	136370000	103030000
D7SKR5	tr|D7SKR5|D7SKR5_VITVI	QVFVTQMGLSDK	12	10	115.57	1351.68	TKGCDHLRQVFVTQMG	TQMGLSDKDIVALSGA	143	154	yes	yes	2	3.6878e-08	326	R	Q	V	D	K	D	0	0	0	1	0	2	0	1	0	0	1	1	1	1	0	1	1	0	0	2	0	0	132740000	2205200	2430600	2102500	43124000	15403000
D7SKR5	tr|D7SKR5|D7SKR5_VITVI	QVFVTQMGLSDKDIVALSGAHTLGR	25	7	115.79	2642.39	TKGCDHLRQVFVTQMG	SGAHTLGRCHKERSGF	143	167	yes	yes	3;4	2.31e-43		R	Q	V	G	R	C	2	1	0	2	0	2	0	3	1	1	3	1	1	1	0	2	2	0	0	3	0	1	80717000	1264100	0	0	24429000	12194000
D7SKR5	tr|D7SKR5|D7SKR5_VITVI	SGFEGPWTSNPLIFDNSYFK	20	57	235.7	2305.07	LGRCHKERSGFEGPWT	IFDNSYFKELLSGEKE	173	192	yes	yes	2;3	7.4147e-243		R	S	G	F	K	E	0	0	2	1	0	0	1	2	0	1	1	1	0	3	2	3	1	1	1	0	0	0	691280000	18753000	13448000	10915000	162180000	99105000
D7SKR5	tr|D7SKR5|D7SKR5_VITVI	SYPTVSEEYK	10	21	81.017	1201.55	________________	PTVSEEYKKAVEKAKK	4	13	yes	yes	2	0.0021676		K	S	Y	Y	K	K	0	0	0	0	0	0	2	0	0	0	0	1	0	0	1	2	1	0	2	1	0	0	286430000	2144100	0	1610200	22962000	24294000
D7SKR5	tr|D7SKR5|D7SKR5_VITVI	SYPTVSEEYKK	11	24	119.03	1329.65	________________	TVSEEYKKAVEKAKKK	4	14	yes	yes	2;3	7.3537e-10		K	S	Y	K	K	A	0	0	0	0	0	0	2	0	0	0	0	2	0	0	1	2	1	0	2	1	0	1	673750000	7361100	9958500	6895300	41497000	19972000
D7SKR5	tr|D7SKR5|D7SKR5_VITVI	YAADEDAFFEDYK	13	19	109.44	1582.65	AFRPLVEKYAADEDAF	DAFFEDYKEAHLKLSE	224	236	yes	yes	2	1.5076e-08		K	Y	A	Y	K	E	3	0	0	3	0	0	2	0	0	0	0	1	0	2	0	0	0	0	2	0	0	0	94882000	1512100	2390200	1989400	18975000	8365800
D7SKR5	tr|D7SKR5|D7SKR5_VITVI	YAADEDAFFEDYKEAHLK	18	7	122.01	2160.96	AFRPLVEKYAADEDAF	DYKEAHLKLSELGFAD	224	241	yes	yes	2;3;4	2.4519e-29		K	Y	A	L	K	L	4	0	0	3	0	0	3	0	1	0	1	2	0	2	0	0	0	0	2	0	0	1	208200000	6887300	4438800	2261400	51783000	36970000
D7SKR5	tr|D7SKR5|D7SKR5_VITVI	TGGPFGTMK	9	19	104.42	894.427	GTFDVKTRTGGPFGTM	GGPFGTMKKPEELAHG	53	61	no	no	2	0.0011024		R	T	G	M	K	K	0	0	0	0	0	0	0	3	0	0	0	1	1	1	1	0	2	0	0	0	0	0	142960000	5818700	8476000	3645500	10288000	9206200
D7SKS4	tr|D7SKS4|D7SKS4_VITVI	AQIQEALQR	9	4	80.688	1055.57	GWCPIFAKAQIQEALQ	QIQEALQRATFDSNSQ	352	360	yes	yes	2	0.0048178		K	A	Q	Q	R	A	2	1	0	0	0	3	1	0	0	1	1	0	0	0	0	0	0	0	0	0	0	0	36437000	0	0	0	0	0
D7SKS4	tr|D7SKS4|D7SKS4_VITVI	ATFDSNSQVGIIFHVMDAVESPPTYFR	27	2	46.399	3027.44	QIQEALQRATFDSNSQ	ESPPTYFRTNRFTNAF	361	387	yes	yes	3	8.9193e-06		R	A	T	F	R	T	2	1	1	2	0	1	1	1	1	2	0	0	1	3	2	3	2	0	1	3	0	0	12588000	0	0	0	0	0
D7SKS4	tr|D7SKS4|D7SKS4_VITVI	AVSYLGELGLLQFR	14	3	85.271	1564.86	IPVESAHRAVSYLGEL	ELGLLQFRDLNADKSP	33	46	yes	yes	2	0.00023622		R	A	V	F	R	D	1	1	0	0	0	1	1	2	0	0	4	0	0	1	0	1	0	0	1	1	0	0	37655000	0	0	0	5964400	0
D7SKS4	tr|D7SKS4|D7SKS4_VITVI	FFGSSLDIR	9	5	80.231	1040.53	VLSYFNARFFGSSLDI	FGSSLDIRYQFVPQVI	569	577	yes	yes	2	0.004895		R	F	F	I	R	Y	0	1	0	1	0	0	0	1	0	1	1	0	0	2	0	2	0	0	0	0	0	0	91179000	0	0	475790	6955100	5392700
D7SKS4	tr|D7SKS4|D7SKS4_VITVI	FRPFSFASLIDDED	14	1	62.68	1657.76	FYHGDGYKFRPFSFAS	ASLIDDED________	805	818	yes	yes	2	0.021188		K	F	R	E	D	-	1	1	0	3	0	0	1	0	0	1	1	0	0	3	1	2	0	0	0	0	0	1	10986000	0	0	0	0	0
D7SKS4	tr|D7SKS4|D7SKS4_VITVI	FTNAFQEIVDAYGVAR	16	34	210.9	1799.88	PTYFRTNRFTNAFQEI	VDAYGVARYQEANPAV	391	406	yes	yes	2;3	9.7237e-139		R	F	T	A	R	Y	3	1	1	1	0	1	1	1	0	1	0	0	0	2	0	0	1	0	1	2	0	0	157810000	0	1000100	597680	10064000	8849300
D7SKS4	tr|D7SKS4|D7SKS4_VITVI	TVFVVFFSGEQAK	13	2	48.467	1457.76	VSTEMIEKTVFVVFFS	FFSGEQAKTKILKICE	239	251	yes	yes	2	0.0066783		K	T	V	A	K	T	1	0	0	0	0	1	1	1	0	0	0	1	0	3	0	1	1	0	0	3	0	0	0	0	0	0	0	0
D7SKS4	tr|D7SKS4|D7SKS4_VITVI	YQDTYPFGVDPSWR	14	6	85.909	1729.77	SNTVGLIKYQDTYPFG	FGVDPSWRGSRSELPF	518	531	yes	yes	2	0.00021138		K	Y	Q	W	R	G	0	1	0	2	0	1	0	1	0	0	0	0	0	1	2	1	1	1	2	1	0	0	56301000	0	0	0	4884100	668000
D7SKV3	tr|D7SKV3|D7SKV3_VITVI	DEWHEDLSFEDGVK	14	4	148.52	1704.73	HLARPILRDEWHEDLS	LSFEDGVKLLEKCMRV	174	187	yes	yes	3	1.6833e-37		R	D	E	V	K	L	0	0	0	3	0	0	3	1	1	0	1	1	0	1	0	1	0	1	0	1	0	0	70142000	1372700	0	0	16494000	5000700
D7SKV3	tr|D7SKV3|D7SKV3_VITVI	DGILMAADMGGSYGSTLR	18	1	29.172	1813.83	SVIGVKYKDGILMAAD	GSYGSTLRYKSVERMK	40	57	yes	yes	2	0.038292		K	D	G	L	R	Y	2	1	0	2	0	0	0	4	0	1	2	0	2	0	0	2	1	0	1	0	0	0	10312000	0	0	0	0	3162700
D7SKV3	tr|D7SKV3|D7SKV3_VITVI	FNPLWNSLVLGGVK	14	14	131.32	1542.86	VMYNRRNKFNPLWNSL	SLVLGGVKNGQKYLGT	125	138	yes	yes	2	1.9077e-23		K	F	N	V	K	N	0	0	2	0	0	0	0	2	0	0	3	1	0	1	1	1	0	1	0	2	0	0	182230000	1624800	1791100	0	22089000	21147000
D7SKV3	tr|D7SKV3|D7SKV3_VITVI	ITEEGVTISQPYSLK	15	16	142.55	1663.87	VNKLQIAKITEEGVTI	ISQPYSLKTFWGFSAF	212	226	yes	yes	2	5.7308e-39		K	I	T	L	K	T	0	0	0	0	0	1	2	1	0	2	1	1	0	0	1	2	2	0	1	1	0	0	144770000	1636600	7012400	1985700	22139000	33584000
D7SKV8	tr|D7SKV8|D7SKV8_VITVI	EQFGRPIGEFQFIQGK	16	15	88.768	1879.96	VLPYVRQREQFGRPIG	EFQFIQGKLADMYTSL	292	307	yes	yes	3	4.5236e-06		R	E	Q	G	K	L	0	1	0	0	0	3	2	3	0	2	0	1	0	3	1	0	0	0	0	0	0	1	102130000	631240	0	0	17161000	2849700
D7SKV8	tr|D7SKV8|D7SKV8_VITVI	LADMYTSLQSSR	12	16	76.073	1370.65	EFQFIQGKLADMYTSL	YTSLQSSRSYVYSVAR	308	319	yes	yes	2	0.00021251	327	K	L	A	S	R	S	1	1	0	1	0	1	0	0	0	0	2	0	1	0	0	3	1	0	1	0	0	0	182120000	0	0	0	24203000	5731900
D7SKV8	tr|D7SKV8|D7SKV8_VITVI	PIGEFQFIQGK	11	12	101.35	1262.67	RQREQFGRPIGEFQFI	EFQFIQGKLADMYTSL	297	307	yes	yes	2	2.6062e-07		R	P	I	G	K	L	0	0	0	0	0	2	1	2	0	2	0	1	0	2	1	0	0	0	0	0	0	0	74664000	0	0	0	10816000	8025900
D7SKV8	tr|D7SKV8|D7SKV8_VITVI	SYVYSVAR	8	1	57.59	943.476	YTSLQSSRSYVYSVAR	SYVYSVARNCENGKID	320	327	yes	yes	2	0.040468		R	S	Y	A	R	N	1	1	0	0	0	0	0	0	0	0	0	0	0	0	0	2	0	0	2	2	0	0	113690000	0	0	0	18135000	14852000
D7SKV8	tr|D7SKV8|D7SKV8_VITVI	TNYFPEEVNLWK	12	1	54.007	1538.74	PHASRIDRTNYFPEEV	PEEVNLWKLMGDFNLH	55	66	yes	yes	2	0.0095104		R	T	N	W	K	L	0	0	2	0	0	0	2	0	0	0	1	1	0	1	1	0	1	1	1	1	0	0	33228000	0	0	0	10404000	11016000
D7SKW2	tr|D7SKW2|D7SKW2_VITVI	PGPVGMAPR	9	4	84.743	880.459	ASTTATSRPGPVGMAP	GPVGMAPRGTAAATAG	610	618	yes	yes	2	0.0041323		R	P	G	P	R	G	1	1	0	0	0	0	0	2	0	0	0	0	1	0	3	0	0	0	0	1	0	0	36563000	0	0	0	0	3664600
D7SKW2	tr|D7SKW2|D7SKW2_VITVI	VGGGSGGSSSGYGGGGSGSNMLR	23	2	55.588	1943.84	TAGMRRRRVGGGSGGS	GSGSNMLRFYTDDAPG	632	654	yes	yes	2	7.5058e-12	328	R	V	G	L	R	F	0	1	1	0	0	0	0	11	0	0	1	0	1	0	0	6	0	0	1	1	0	0	21822000	1378600	1617400	509950	0	0
D7SKW2	tr|D7SKW2|D7SKW2_VITVI	FYTDDAPGLK	10	24	74.841	1125.53	GSGSNMLRFYTDDAPG	TDDAPGLKITPTVVLV	655	664	yes	no	2	0.0033527		R	F	Y	L	K	I	1	0	0	2	0	0	0	1	0	0	1	1	0	1	1	0	1	0	1	0	0	0	252020000	2327300	0	1401800	0	11756000
D7SKY1	tr|D7SKY1|D7SKY1_VITVI	GMVESAFEFAR	11	4	87.184	1242.57	SYYGDSPRGMVESAFE	ESAFEFARICRKLDYH	256	266	yes	yes	2	0.00045708		R	G	M	A	R	I	2	1	0	0	0	0	2	1	0	0	0	0	1	2	0	1	0	0	0	1	0	0	19121000	0	951810	0	4665200	4291400
D7SKY1	tr|D7SKY1|D7SKY1_VITVI	SAIGIGTLLQDGLGDTIR	18	2	144.68	1798.98	EGEDGRMKSAIGIGTL	DGLGDTIRVSLTEPPE	325	342	yes	yes	2	2.267e-58		K	S	A	I	R	V	1	1	0	2	0	1	0	4	0	3	3	0	0	0	0	1	2	0	0	0	0	0	22615000	611150	0	0	9175900	6064000
D7SKY1	tr|D7SKY1|D7SKY1_VITVI	TLFDLQEISAQIR	13	7	122.45	1532.82	VSCPSCGRTLFDLQEI	QEISAQIREKTSHLPG	650	662	yes	yes	2	3.0456e-13		R	T	L	I	R	E	1	1	0	1	0	2	1	0	0	2	2	0	0	1	0	1	1	0	0	0	0	0	66608000	1661000	2275500	0	12907000	6903600
D7SKY4	tr|D7SKY4|D7SKY4_VITVI	LEFAHLWNK	9	1	46.334	1156.6	PIFGKKSRLEFAHLWN	EFAHLWNKTVDKTLGP	59	67	yes	yes	3	0.018825		R	L	E	N	K	T	1	0	1	0	0	0	1	0	1	0	2	1	0	1	0	0	0	1	0	0	0	0	0	0	0	0	0	0
D7SKY4	tr|D7SKY4|D7SKY4_VITVI	SIADTQSQLDPQSLK	15	4	67.415	1629.82	EQRKCIYKSIADTQSQ	QLDPQSLKTEPIFGKK	34	48	yes	yes	2	0.00093267		K	S	I	L	K	T	1	0	0	2	0	3	0	0	0	1	2	1	0	0	1	3	1	0	0	0	0	0	28838000	0	0	0	6560400	3002300
D7SKY8	tr|D7SKY8|D7SKY8_VITVI	HVDEDDASISWR	12	1	52.576	1428.63	QSWVPGKRHVDEDDAS	DDASISWRKRKKHFFI	164	175	yes	yes	2	0.0067852		R	H	V	W	R	K	1	1	0	3	0	0	1	0	1	1	0	0	0	0	0	2	0	1	0	1	0	0	0	0	0	0	0	0
D7SKY8	tr|D7SKY8|D7SKY8_VITVI	IETVLLK	7	2	60.972	814.516	HLKDCRLRIETVLLKS	RIETVLLKSNVLSEVQ	433	439	yes	yes	2	0.065897		R	I	E	L	K	S	0	0	0	0	0	0	1	0	0	1	2	1	0	0	0	0	1	0	0	1	0	0	15481000	0	0	0	0	3263300
D7SKY8	tr|D7SKY8|D7SKY8_VITVI	SIYLDQYVSSEFSPPINSSR	20	10	74.029	2288.1	GLWHFIYRSIYLDQYV	SPPINSSRQQKRLYRA	508	527	yes	yes	2	5.9525e-09		R	S	I	S	R	Q	0	1	1	1	0	1	1	0	0	2	1	0	0	1	2	6	0	0	2	1	0	0	35285000	0	0	0	7265500	0
D7SKY8	tr|D7SKY8|D7SKY8_VITVI	VEDLPVDTSPR	11	2	69.815	1226.61	SLLDGGMRVEDLPVDT	LPVDTSPRSGILSAHL	457	467	yes	yes	2	0.0030271		R	V	E	P	R	S	0	1	0	2	0	0	1	0	0	0	1	0	0	0	2	1	1	0	0	2	0	0	30460000	0	0	0	0	9821700
D7SKZ6	tr|D7SKZ6|D7SKZ6_VITVI	RLDNMLYVGITEDHK	15	1	45.614	1802.9	FVLEVAKKRLDNMLYV	VGITEDHKESATMFGN	287	301	yes	yes	2	0.067935	329	K	R	L	H	K	E	0	1	1	2	0	0	1	1	1	1	2	1	1	0	0	0	1	0	1	1	0	1	161920000	0	0	0	33508000	25204000
D7SL25	tr|D7SL25|D7SL25_VITVI	DVAEAHIQAFEVPSASGR	18	21	144.72	1882.92	SFGWVNVKDVAEAHIQ	EVPSASGRYCLVERVV	229	246	yes	yes	2;3	2.2556e-58		K	D	V	G	R	Y	4	1	0	1	0	1	2	1	1	1	0	0	0	1	1	2	0	0	0	2	0	0	209510000	3475200	5429700	7632000	49491000	44076000
D7SL25	tr|D7SL25|D7SL25_VITVI	ELFPDFQLPEK	11	7	71.085	1361.69	SELVKILKELFPDFQL	PDFQLPEKCADDKPFV	265	275	yes	yes	2	0.0026455		K	E	L	E	K	C	0	0	0	1	0	1	2	0	0	0	2	1	0	2	2	0	0	0	0	0	0	0	120730000	1048000	2822100	1844500	21668000	18454000
D7SL25	tr|D7SL25|D7SL25_VITVI	GLQLWYVVSK	10	12	99.283	1191.67	FTDPDFCKGLQLWYVV	QLWYVVSKTLAEDAAW	156	165	yes	yes	2	0.00027388		K	G	L	S	K	T	0	0	0	0	0	1	0	1	0	0	2	1	0	0	0	1	0	1	1	2	0	0	72786000	0	0	0	11721000	1112500
D7SL25	tr|D7SL25|D7SL25_VITVI	SLGIEFIPLEVSLK	14	6	91.076	1543.89	QVSKEKAKSLGIEFIP	IPLEVSLKETVESLKE	295	308	yes	yes	2	1.4725e-05		K	S	L	L	K	E	0	0	0	0	0	0	2	1	0	2	3	1	0	1	1	2	0	0	0	1	0	0	45202000	1868000	0	1148700	13055000	10091000
D7SL25	tr|D7SL25|D7SL25_VITVI	TLAEDAAWK	9	3	51.445	1003.5	QLWYVVSKTLAEDAAW	LAEDAAWKFAKEKGID	166	174	yes	yes	2	0.017151		K	T	L	W	K	F	3	0	0	1	0	0	1	0	0	0	1	1	0	0	0	0	1	1	0	0	0	0	19172000	7152900	5792700	6226900	0	0
D7SL25	tr|D7SL25|D7SL25_VITVI	VVHYSELVK	9	28	107.56	1072.59	GRYCLVERVVHYSELV	VHYSELVKILKELFPD	253	261	yes	yes	2;3	0.00010725		R	V	V	V	K	I	0	0	0	0	0	0	1	0	1	0	1	1	0	0	0	1	0	0	1	3	0	0	664210000	16844000	18384000	10170000	97734000	123490000
D7SL25	tr|D7SL25|D7SL25_VITVI	VVVTSSIAAVAYNR	14	53	180.09	1448.8	AKASSVKRVVVTSSIA	IAAVAYNRNPRTPDVV	121	134	yes	yes	2;3	3.6067e-76		R	V	V	N	R	N	3	1	1	0	0	0	0	0	0	1	0	0	0	0	0	2	1	0	1	4	0	0	545490000	9995100	7444400	3209900	103450000	91750000
D7SL25	tr|D7SL25|D7SL25_VITVI	KTEHLLSLDGAK	12	22	105.08	1310.72	VRDPNDPKKTEHLLSL	LLSLDGAKERLHLFKA	42	53	no	no	2;3	2.0759e-06		K	K	T	A	K	E	1	0	0	1	0	0	1	1	1	0	3	2	0	0	0	1	1	0	0	0	0	1	297700000	2240900	2155500	1971500	25319000	60012000
D7SL25	tr|D7SL25|D7SL25_VITVI	TEHLLSLDGAK	11	5	77.26	1182.62	RDPNDPKKTEHLLSLD	LLSLDGAKERLHLFKA	43	53	no	no	2;3	0.001371		K	T	E	A	K	E	1	0	0	1	0	0	1	1	1	0	3	1	0	0	0	1	1	0	0	0	0	0	63435000	0	0	0	9048500	10574000
D7SL30	tr|D7SL30|D7SL30_VITVI	ESFGNFTNR	9	2	57.267	1070.48	WKRKRQTKESFGNFTN	SFGNFTNRMGFEKLQE	610	618	yes	yes	2	0.019191		K	E	S	N	R	M	0	1	2	0	0	0	1	1	0	0	0	0	0	2	0	1	1	0	0	0	0	0	105750000	0	3416900	2340200	14665000	11512000
[truncated: 10,223 more rows]
[truncated: 62 more columns]

## Sheet: protein group list
Supplementary Data File 1 - Sheet 2 protein group list raw data
[truncated: 2,534 more rows]
[truncated: 47 more columns]

## Sheet: all identified protein list
Supplementary Data File 1 - Sheet 3 all identified protein list raw data
[truncated: 11,479 more rows]
