# Supplementary material for: Quantitative Proteome Analysis Reveals Changes in the Protein Landscape During Grape Berry Development With a Focus on Vacuolar Transport Proteins
Source: Front Plant Sci. 2019 May 15;10:641. doi: 10.3389/fpls.2019.00641 (PMC6530609; doi:10.3389/fpls.2019.00641)
Supplement: Supplementary file 3 [file Data_Sheet_2.xlsx]

## Sheet: Sheet1
Supplementary Data File 2 Transport proteins quantified in grape berry vacuole with differential abundance along grape berry development and ripening. Column B, gene name with ‘Vvi’ indicating protein annotated against Vitis vinifera, otherwise, annotated against Arabidopsis. Columns E-I, mean normalized protein abundance of three replicates from each sampling date. Family name abbreviation and t…
Uniprot Accesions	Gene Name	Description in Vitis vinifera	Description in Arabidopsis	30DAF	52DAF	66DAF	77DAF	96DAF	Abundance change pattern	Family name abbreviation	Transporter class	TMD	References	Differentially abundant transport protein group
D7U516	VAB2	Putative uncharacterized protein	ATPase, V1 complex, subunit B protein	3.07166	9.6798	4.74196	1.64343	1.41472		V-ATPase	Primary active transporters	0	abdefghi	Group II
A5ACR7	VHA-d2	V-type proton ATPase subunit	V-type proton ATPase subunit d2	0.757361	4.87516	2.28381	0.504559	0.654399		V-ATPase	Primary active transporters	0	abdefgh	Group II
D7SKS4	VHA-a1	V-type proton ATPase subunit a	V-type proton ATPase subunit a1	0.144636	0.582633	0.763272	1.22834	3.69176		V-ATPase	Primary active transporters	6	b	Group III
A5B4N7	VHA-F	V-type proton ATPase subunit F	V-type proton ATPase subunit F	0.295461	2.09501	1.58495	1.2237	3.5842		V-ATPase	Primary active transporters	0	abdefg	Group III
D7SS06	VHA-A	Putative uncharacterized protein	V-type proton ATPase catalytic subunit A	7.01735	33.4139	34.8062	24.447	51.2686		V-ATPase	Primary active transporters	0	abcdefghi	Group III
F6H560	VHA-D	Putative uncharacterized protein	V-type proton ATPase subunit D	0.0828061	0.385192	0.233252	0.131051	0.645865		V-ATPase	Primary active transporters	0	abdefgh	Group III
F6HMT9	VHA-E1	Putative uncharacterized protein	V-type proton ATPase subunit E1	0.160386	0.565303	0.242067	0.186387	0.80723		V-ATPase	Primary active transporters	0	abdefghi	Group III
D7T7L1	VHA-H	Putative uncharacterized protein	V-type proton ATPase subunit H	2.99469	11.7947	13.1704	11.5894	15.2911		V-ATPase	Primary active transporters	0	abcdefgh	Group III
D7U5K0	VHA-a3	V-type proton ATPase subunit a	V-type proton ATPase subunit a3	0.687921	7.18175	17.9906	10.0211	22.9163		V-ATPase	Primary active transporters	6	abcdefgh	Group III
D7TVB7	VHA-E1	Putative uncharacterized protein	V-type proton ATPase subunit E1	0.206535	1.98367	1.99029	2.39332	2.26617		V-ATPase	Primary active transporters	0	abdefghi	Group II
D7SVJ2	VHA-C	V-type proton ATPase subunit C	V-type proton ATPase subunit C	3.42089	6.6928	5.02897	5.62399	4.21576		V-ATPase	Primary active transporters	0	abdefgh	Group II
F6H3A8	AHA5	Plasma membrane ATPase	ATPase 5, plasma membrane-type	0.104438	0.311193	0.150376	0.179944	1.05693		P-ATPase	Primary active transporters	10		Group III
D7T4X2	AVP1	Putative uncharacterized protein	Pyrophosphate-energized vacuolar membrane proton pump 1	0.833048	0.879297	1.98131	2.517	5.12381		H+-PPase	Primary active transporters	15	abcdefgh	Group III
D7SS21	AVPL2	Putative uncharacterized protein	Pyrophosphate-energized membrane proton pump 3	0.366466	0.643607	2.65066	3.46338	4.39148		H+-PPase	Primary active transporters	15	bf	Group III
D7TZ79	AVP1	Putative uncharacterized protein	Pyrophosphate-energized vacuolar membrane proton pump 1	0.897659	3.37514	4.54768	3.39862	3.35318		H+-PPase	Primary active transporters	13	abcdefgh	Group II
D7UA22	AVP1	Putative uncharacterized protein	Pyrophosphate-energized vacuolar membrane proton pump 1	8.36835	12.72	13.5882	12.2854	13.3766		H+-PPase	Primary active transporters	14	abcdefgh	Group II
Q2HZF5	Vvipip2	Aquaporin PIP2	Plasma membrane intrinsic protein 2	14.1534	15.5783	21.7064	10.7589	8.54278		MIP	Channels/pores	6	gi	Group II
Q0MX16	PIP1-2	Putative aquaporin	Aquaporin PIP1-2	97.2936	161.287	273.052	223.935	181.685		MIP	Channels/pores	6	afi	Group II
A3FA66	VviPIP1;4	Aquaporin PIP14	Aquaporin PIP1-2	4.03287	6.25828	9.56737	8.18041	8.94277		MIP	Channels/pores	6	afi	Group III
F6I0Z8	PIP2-7	Plasma membrane 22 aquaporin	Aquaporin PIP2-7	37.3651	84.999	121.939	57.2778	33.8485		MIP	Channels/pores	6	bfgi	Group II
Q5PXH0	PIP2B	Aquaporin	Plasma membrane intrinsic protein 2	57.7887	50.3536	192.395	262.407	387.639		MIP	Channels/pores	6	gi	Group III
F6HQS2	SIP2:1	Putative uncharacterized protein	Small and basic intrinsic protein 21	0.081776	0.0922917	0.211989	0.364006	0.521833		MIP	Channels/pores	4		Group III
Q107W9	SIP1-1	Putative uncharacterized protein	Aquaporin SIP1-1	1.30544	3.15156	3.1088	4.94975	5.62104		MIP	Channels/pores	5		Group III
Q0MX09	VviTIP2;1	Aquaporin TIP2;1	Aquaporin TIP2-1	29.2519	229.79	266.005	132.633	50.4363		MIP	Channels/pores	6	aeg	Group II
A3FA68	VviPIP2;3	Aquaporin PIP23	Probable aquaporin PIP2-5	0.0956284	0.0603189	1.87464	3.84347	7.69991		MIP	Channels/pores	6		Group III
D7SH08	MUA22.12	Putative uncharacterized protein	Major facilitator superfamily protein	0.384553	0.0749149	0.516533	1.07092	0.947388		MFS	Electrochemical Potential-driven Tranporters	12	aeghi	Group III
E0CV92	At4g27720	Putative uncharacterized protein	Major facilitator superfamily protein	1.50177	1.94371	5.49642	6.61152	6.76964		MFS	Electrochemical Potential-driven Tranporters	11	fi	Group III
D7TVP8	At1g64650	Putative uncharacterized protein	Major facilitator superfamily protein	0.0911835	0.304291	2.00279	2.36518	2.00615		MFS	Electrochemical Potential-driven Tranporters	11	efi	Group III
D7SVN8	MUA22.12	Putative uncharacterized protein	Major facilitator superfamily protein	0.195806	3.43623	4.42241	3.25253	1.43591		MFS	Electrochemical Potential-driven Tranporters	12	aeghi	Group II
D7TW83	At4g22990	Putative uncharacterized protein	SPX domain-containing membrane protein At4g22990	5.34396	2.09942	1.80218	1.91763	1.58292		MFS	Electrochemical Potential-driven Tranporters	11	g	Group I
Q539E7	At5g16150	Plastid hexose transporter	Plastidic glucose transporter 4	3.08339	9.9394	9.72642	6.3787	4.26861		MFS	Electrochemical Potential-driven Tranporters	10	i	Group II
E0CQD6	At1g75220	Putative uncharacterized protein	Sugar transporter ERD6-like 6	2.63539	4.68316	7.55844	4.09841	2.91037		MFS	Electrochemical Potential-driven Tranporters	12	degh	Group II
E3VWV8	VviTMT2	Putative tonoplastic monosaccharide transporter	Monosaccharide-sensing protein 2	0.519213	5.72472	4.60439	3.09856	2.33315		MFS	Electrochemical Potential-driven Tranporters	11	adefghi	Group II
Q4U339	VviHT6	Putative hexose transporter	Monosaccharide-sensing protein 2	2.98741	5.51428	8.21588	11.7983	12.1019		MFS	Electrochemical Potential-driven Tranporters	11	adefghi	Group III
F6GTB8	At1g74780	Putative uncharacterized protein	Nodulin-like / Major Facilitator Superfamily protein	0.484844	0.495876	0.963295	0.551015	0.16593		MFS	Electrochemical Potential-driven Tranporters	13	g	Group II
D7TVM3	ABCF3	Putative uncharacterized protein	ABC transporter F family member 3	0.0911905	0.378174	0.267011	0.26749	0.310258		ABCThe( (Putative) Drug Resistance ATPase-2 (Drug RA2) Family)	Primary active transporters	0		Group II
F6HW96	ABCF4	Putative uncharacterized protein	ABC transporter F family member 4	0.336444	0.93901	1.00169	0.723124	1.22222		ABCThe( (Putative) Drug Resistance ATPase-2 (Drug RA2) Family)	Primary active transporters	0		Group III
F6HKB3	ABCB1	Putative uncharacterized protein	ABC transporter B family member 1	0.257087	1.09296	0.275487	0.798679	0.0940286		ABC(The Multidrug Resistance Exporter (MDR) Family (ABCB))	Primary active transporters	12	h	Group II
F6H6G1	ABCC10	Putative uncharacterized protein	ABC transporter C family member 10	0.081794	0.0680281	0.0568382	0.0386369	0.0856951		ABC(The Drug Conjugate Transporter (DCT) Family (ABCC) (Dębska et al., 2011))	Primary active transporters	12	deg	Group I
D7TKF5	ABCC2	Putative uncharacterized protein	ABC transporter C family member 2	0.0729244	0.715705	0.748562	0.405156	0.0926231		ABC(The Drug Conjugate Transporter (DCT) Family (ABCC) (Dębska et al., 2011))	Primary active transporters	14	bdeghi	Group II
F6H3C3	At5g24810	Putative uncharacterized protein	ABC1 family protein	0.0622569	0.0506138	0.811767	0.253926	0.134539		ABC(The Drug Conjugate Transporter (DCT) Family (ABCC) (Dębska et al., 2011))	Primary active transporters	0		Group II
F6HY32	ABCC8	Putative uncharacterized protein	ABC transporter C family member 8	0.11058	1.16302	3.57442	6.07095	2.96497		ABC(The Drug Conjugate Transporter (DCT) Family (ABCC) (Dębska et al., 2011))	Primary active transporters	32	egh	Group III
F6GVG9	ABCC9	Putative uncharacterized protein	ABC transporter C family member 9	0.160376	0.971269	3.28011	4.70739	3.11092		ABC(The Drug Conjugate Transporter (DCT) Family (ABCC) (Dębska et al., 2011))	Primary active transporters	15	h	Group III
F6HX69	ABCG40	Putative uncharacterized protein	ABC transporter G family member 40	1.62328	5.09056	5.49201	4.67146	3.0813		ABC( The Pleiotropic Drug Resistance (PDR) Family (ABCG))	Primary active transporters	12	d	Group II
F6HX51	ABCG40	Putative uncharacterized protein	ABC transporter G family member 40	0.0655726	0.104607	0.134723	0.0817627	0.0544162		ABC( The Pleiotropic Drug Resistance (PDR) Family (ABCG))	Primary active transporters	13	d	Group II
D7TFC0	ABCE2	Putative uncharacterized protein	ABC transporter E family member 2	0.677498	1.54966	1.66293	1.18244	1.15771		ABC( The Cobalamin Precursor (B12-P) Family)	Primary active transporters	0		Group II
F6I493	TGD1	Putative uncharacterized protein	Protein TRIGALACTOSYLDIACYLGLYCEROL 1, chloroplastic	0.150103	0.282921	0.505531	0.353842	0.219926		ABC( The γ-Hexachlorocyclohexane (HCH) Family (Similar to 3.A.1.12 and 3.A.1.24))	Primary active transporters	5		Group II
F6HYX4	TGD2	Putative uncharacterized protein	Protein TRIGALACTOSYLDIACYLGLYCEROL 2, chloroplastic	0.185847	2.79944	3.85376	1.93265	1.53958		ABC( The γ-Hexachlorocyclohexane (HCH) Family (Similar to 3.A.1.12 and 3.A.1.24))	Primary active transporters	1		Group II
F6HMP9	CAT2	Putative uncharacterized protein	Cationic amino acid transporter 2, vacuolar	0.0493474	0.0859408	0.205005	0.112087	0.0755873		APC	Electrochemical Potential-driven Tranporters	15	aegh	Group II
F6H4P6	AVT1I	Putative uncharacterized protein	Amino acid transporter AVT1I	1.28149	0.477647	0.742522	0.235296	0.0375071		AAAP	Electrochemical Potential-driven Tranporters	9	e	Group I
D7UBG5	LHT1	Putative uncharacterized protein	Lysine histidine transporter 1	0.0771497	0.0585313	0.265898	2.27449	1.29341		AAAP	Electrochemical Potential-driven Tranporters	11		Group III
F6HNM4	PROT1	Putative uncharacterized protein	Proline transporter 1	0.0692824	0.0775836	0.400417	0.523453	0.326536		AAAP	Electrochemical Potential-driven Tranporters	11		Group III
E0CNV4	AAP6	Putative uncharacterized protein	Amino acid permease 6	0.0979087	0.257517	1.91526	3.496	1.43007		AAAP	Electrochemical Potential-driven Tranporters	10		Group III
F6GVU0	AVT6A	Putative uncharacterized protein	Amino acid transporter AVT6A	0.109902	1.34187	4.16895	3.41752	5.61902		AAAP	Electrochemical Potential-driven Tranporters	11	aegh	Group III
D7SK27	NPF8.1	Putative uncharacterized protein	Protein NRT1/ PTR FAMILY 8.1	0.0582683	0.257038	0.412818	0.354882	0.0556527		POT/PTR	Electrochemical Potential-driven Tranporters	10	dg	Group II
F6HEU1	NPF8.3	Putative uncharacterized protein	Protein NRT1/ PTR FAMILY 8.3	0.0644532	0.299636	1.44127	1.44221	1.51626		POT/PTR	Electrochemical Potential-driven Tranporters	10	abdegh	Group III
F6I3D0	At5g58100	Putative uncharacterized protein	Transmembrane protein	0.113931	0.355719	0.505461	0.732953	0.961053		PUP	Incompletely characterized transport sysmtems	2		Group III
F6GTV2	ECA4	Putative uncharacterized protein	Calcium-transporting ATPase 4, endoplasmic reticulum-type	0.157926	0.271034	0.0843578	0.494286	0.446278		P-ATPase	Primary active transporters	9		Group III
D7THS9	ACA4	Calcium-transporting ATPase	Calcium-transporting ATPase 4, plasma membrane-type	0.0561676	0.544441	0.38508	0.502736	0.433631		P-ATPase	Primary active transporters	8	adefgh	Group II
D7SQF9	ACA10	Calcium-transporting ATPase	Calcium-transporting ATPase 10, plasma membrane-type	0.326757	1.30153	3.12293	7.4295	7.45369		P-ATPase	Primary active transporters	8		Group III
D7TIB6	At5g06660	Calcium load-activated calcium channel	Calcium load-activated calcium channel	0.0973824	0.0856242	0.592529	1.38932	2.57364		CLAC	Channels/pores	2		Group III
E0CVN9	CSC1	Putative uncharacterized protein	Calcium permeable stress-gated cation channel 1	0.115352	0.226198	0.331264	0.366901	0.376797		CaClC	Channels/pores	8	i	Group III
F6HI07	MQK4.30	Putative uncharacterized protein	Voltage-dependent L-type calcium channel subunit	0.133539	0.562067	1.29499	1.65731	1.04871		T-A Hol	Channels/pores	4	g	Group III
E0CSC2	NCL	Putative uncharacterized protein	Sodium/calcium exchanger NCL	3.03085	5.54802	10.7571	14.7558	11.3157		CaCA	Electrochemical Potential-driven Tranporters	11	acefgh	Group III
F6HU94	MTPA2	Putative uncharacterized protein	Metal tolerance protein A2	0.034441	0.310907	0.431929	0.179867	0.166924		CDF	Electrochemical Potential-driven Tranporters	6		Group II
F6I2Y7	MTP1	Putative uncharacterized protein	Metal tolerance protein 1	0.0734689	0.0876847	0.17331	0.0931935	0.0794529		CDF	Electrochemical Potential-driven Tranporters	6	begh	Group II
F6H416	POT4	Potassium transporter	Potassium transporter 4	0.290138	0.777846	0.711328	0.79065	0.508399		KUP	Electrochemical Potential-driven Tranporters	10	g	Group II
F6HS56	KAB1	Putative uncharacterized protein	Probable voltage-gated potassium channel subunit beta	4.82198	8.10731	4.0677	2.67769	1.93577		KTN	Unclassifed	0		Group II
D7SKJ3	MMN10.21	Putative uncharacterized protein	K-stimulated pyrophosphate-energized sodium pump protein	0.0706693	0.110863	0.29357	0.420459	0.529849		Unkown	Unclassifed	1		Group III
D7T0E2	At1g53035	Putative uncharacterized protein	Transmembrane protein	0.0719185	0.285535	0.78479	1.58327	1.49694		TerC	Electrochemical Potential-driven Tranporters	4		Group III
F6HSW1	NRAMP3	Putative uncharacterized protein	Metal transporter Nramp3	0.388129	0.98186	1.44864	0.823536	1.56889		Nramp	Electrochemical Potential-driven Tranporters	11	begh	Group III
F6HGI4	PDR2	Cation-transporting ATPase	Probable manganese-transporting ATPase PDR2	0.0851103	0.062344	0.10301	0.247914	0.483873		P-ATPase	Primary active transporters	10		Group III
D7SQF0	At4g29870	Putative uncharacterized protein	Oligosaccharyltransferase complex/magnesium transporter family protein	0.0957131	0.730397	1.70938	2.88381	3.0374		MagT1	Channels/pores	3		Group III
D7UBY5	ATX1	Putative uncharacterized protein	Copper transport protein ATX1	0.469267	0.232147	0.410154	0.946325	2.82035		P-ATPase	Primary active transporters	0		Group III
F6H3H1	At4g32680	Putative uncharacterized protein	Transmembrane protein	0.0993378	0.10498	0.0916517	0.194766	0.351259		ClC	Electrochemical Potential-driven Tranporters	2		Group III
F6HX73	MOT2	Putative uncharacterized protein	Molybdate transporter 2	0.0799963	0.676234	2.49364	1.41523	0.860151		SulP	Electrochemical Potential-driven Tranporters	10	ag	Group II
F6GUS3	VviAMT1-1	Ammonium transporter	Ammonium transporter 1 member 1	0.472802	0.431536	0.758678	0.50865	0.458856		Amt	Channels/pores	9	g	Group II
D7U0H3	At2g25737	Putative uncharacterized protein	Sulfite exporter TauE/SafE family protein 3	1.51894	0.0729427	0.0457176	0.117469	0.0500211		TSUP	Electrochemical Potential-driven Tranporters	10		Group I
D7T781	At5g43745	Putative uncharacterized protein	Putative ion channel POLLUX-like 2	0.239778	1.24546	1.23227	1.00292	1.47237		VIC	Channels/pores	2		Group III
A5B3K2	PCAP1	Putative uncharacterized protein	Plasma membrane-associated cation-binding protein 1	0.9646	1.37516	2.97857	0.882941	1.9801		RIR-CaC	Channels/pores	0	af	Group II
F6H3R9	MSL10	Putative uncharacterized protein	Mechanosensitive ion channel protein 10	1.17303	1.75697	2.54062	0.633914	0.338098		MscS	Channels/pores	6	bgh	Group II
F6I664	MSL1	Putative uncharacterized protein	Mechanosensitive ion channel protein 1, mitochondrial	0.0815568	1.73767	2.36116	2.02879	1.48376		MscS	Channels/pores	4		Group II
E0CPD6	At1g47640	Putative uncharacterized protein	Seven transmembrane domain protein	0.113436	0.291769	0.79201	1.15874	1.33386		NAT/NCS2	Electrochemical Potential-driven Tranporters	6		Group III
D7SHW5	NAT6	Putative uncharacterized protein	Nucleobase-ascorbate transporter 6	1.40402	0.443545	0.428174	0.936061	0.218378		NAT/NCS2	Electrochemical Potential-driven Tranporters	11	bh	Group I
E0CPC6	NAT3	Putative uncharacterized protein	Nucleobase-ascorbate transporter 3	0.0467429	0.105409	0.873911	1.58972	0.884503		NAT/NCS2	Electrochemical Potential-driven Tranporters	10		Group III
F6I0B4	PILS1	Putative uncharacterized protein	Protein PIN-LIKES 1	5.00424	0.91982	2.54424	2.13005	1.19456		AEC	Electrochemical Potential-driven Tranporters	10		Group I
D7U495	PILS1	Putative uncharacterized protein	Protein PIN-LIKES 1	0.76531	0.384967	1.61433	1.95763	0.738706		AEC	Electrochemical Potential-driven Tranporters	9		Group III
D7SWC1	PILS5	Putative uncharacterized protein	Protein PIN-LIKES 5	0.603453	2.49031	2.83193	0.798453	0.799337		AEC	Electrochemical Potential-driven Tranporters	10		Group II
F6GVU9	BIG	Putative uncharacterized protein	Auxin transport protein (BIG)	1.20958	4.15795	7.07845	16.4192	14.4368		Unkown	Channels/pores	0		Group III
F6I190	At4g17650	Putative uncharacterized protein	Polyketide cyclase / dehydrase and lipid transport protein	0.0712276	0.143224	0.15937	0.288847	3.15956		Unkown	Unclassifed	0		Group III
F6H9B5	VviGPT1	GPT1	Glucose-6-phosphate/phosphate translocator 1, chloroplastic	4.10271	3.21302	2.4496	1.66074	4.38936		DMT	Electrochemical Potential-driven Tranporters	6	fi	Group I
F6HH60	GFT1	Putative uncharacterized protein	GDP-fucose transporter 1	0.123205	0.29931	0.586643	0.744277	0.30398		DMT	Electrochemical Potential-driven Tranporters	9		Group III
F6HH83	At5g25400	Putative uncharacterized protein	Probable sugar phosphate/phosphate translocator At5g25400	0.150642	0.151284	0.647481	0.545597	0.782608		DMT	Electrochemical Potential-driven Tranporters	10	f	Group III
D7TJE0	TPT	Putative uncharacterized protein	Triose phosphate/phosphate translocator TPT, chloroplastic	1.65984	6.71596	7.64414	5.97619	3.61313		DMT	Electrochemical Potential-driven Tranporters	7	f	Group II
D7U571	F20M13.200	Putative uncharacterized protein	Plasma-membrane choline transporter family protein	0.310383	0.700082	1.16371	0.999064	0.62064		CLT	Electrochemical Potential-driven Tranporters	8	gh	Group II
F6H860	At1g11200	Putative uncharacterized protein	Organic solute transporter ostalpha protein (DUF300)	0.0893839	0.271152	1.0922	0.869184	0.975594		OST	Electrochemical Potential-driven Tranporters	6		Group III
F6GZY6	At4g07390	Putative uncharacterized protein	Mannose-P-dolichol utilization defect 1 protein homolog 2	0.677706	0.443837	1.84719	2.01212	2.33141		LCT	Electrochemical Potential-driven Tranporters	3		Group III
D7SPN0	BCCP1	Putative uncharacterized protein	Biotin carboxyl carrier protein of acetyl-CoA carboxylase 1, chloroplastic	0.112735	0.450269	0.500807	0.443871	1.42713		NaT-DC	Primary active transporters	0		Group III
F6HJD9	At1g22750	Putative uncharacterized protein	Transmembrane protein	0.103767	0.242632	0.60368	1.22635	1.87582		GT39	Incompletely characterized transport sysmtems	6	a	Group III
F6H446	MUA22.2	Putative uncharacterized protein	Translocon-associated protein subunit beta	1.20478	3.15642	6.03934	8.22446	8.72068		Fru(OOP)	Group translocators	2	eg	Group III
D7UAL7	MYN21.7	Putative uncharacterized protein	Transmembrane protein C9orf5 protein	0.0736302	0.392235	0.605843	0.707946	0.511931		Unclassified	Electrochemical Potential-driven Tranporters	6		Group II
F6I0S6	At4g38350	Putative uncharacterized protein	Patched family protein	0.0697057	0.367847	1.71625	1.49383	0.719485		RND	Electrochemical Potential-driven Tranporters	14	abcefghi	Group II
A5C347	At1g74730	Putative uncharacterized protein	Transmembrane protein, putative (DUF1118)	0.872308	1.49046	0.739391	0.405222	0.126225		P-ATPase	Primary active transporters	2		Group II
F6H4J1	PATL5	Putative uncharacterized protein	Patellin-5	1.4289	2.48499	1.91716	1.37841	1.05305		PPI	Primary active transporters	0		Group II
F6I408	PATL3	Putative uncharacterized protein	Patellin-3	0.66027	3.46865	3.58082	2.76295	2.62396		PPI	Primary active transporters	2	g	Group II
F6I407	PATL5	Putative uncharacterized protein	Patellin-5	53.2371	167.732	173.376	227.116	172.597		PPI	Primary active transporters	0		Group II
E0CQW4	TRN1	Putative uncharacterized protein	Transportin-1	0.302507	0.742676	0.923782	1.41026	0.746722		E-NPC	Channels/pores	0		Group III
D7SHZ2	MOS14	Putative uncharacterized protein	Transportin MOS14	0.162514	1.64499	2.37004	2.54624	2.34007		E-NPC	Channels/pores	0		Group II
D7U509	TRN1	Putative uncharacterized protein	Transportin-1	1.10798	9.36739	13.6339	21.7753	12.4502		E-NPC	Channels/pores	0		Group III
F6H249	At4g21700	Putative uncharacterized protein	DUF2921 family protein, putative (DUF2921)	0.136748	0.36958	1.46942	1.95657	1.86761		UBP16	Incompletely characterized transport sysmtems	9		Group III
D7T0F4	At2g23940	Putative uncharacterized protein	Transmembrane protein (DUF788)	0.103635	0.111267	0.23066	0.415416	0.566308		TMEM208	Incompletely characterized transport sysmtems	2		Group III
F6H957	At1g09580	Putative uncharacterized protein	Transmembrane emp24 domain-containing protein p24delta3	0.121552	0.41916	0.469669	0.468191	0.717765		TMED	Incompletely characterized transport sysmtems	2		Group III
D7T744	At3g22845	Putative uncharacterized protein	Transmembrane emp24 domain-containing protein p24beta3	0.0855001	2.16672	2.35359	3.06011	4.85483		TMED	Incompletely characterized transport sysmtems	1	ah	Group III
F6HV89	At1g26690	Putative uncharacterized protein	Transmembrane emp24 domain-containing protein p24delta9	0.0604182	0.382111	0.443504	1.22343	0.959079		TMED	Incompletely characterized transport sysmtems	2		Group III
F6H5N9	At3g28720	Putative uncharacterized protein	Transmembrane protein	0.507045	1.44135	1.25389	1.32389	1.28151		TPS	Channels/pores	2		Group II
D7TU46	At4g33625	Putative uncharacterized protein	Vacuole protein	0.14722	0.890254	1.60319	1.07864	1.14324		CaTA	Channels/pores	4	aeg	Group II
D7SL35	At3g20920	Putative uncharacterized protein	Translocation protein-like protein	0.0743291	0.241393	0.972602	1.40908	0.849396		NSCC2	Channels/pores	3	d	Group III
F6HER9	CBSDUFCH2	Putative uncharacterized protein	DUF21 domain-containing protein At1g55930, chloroplastic	0.455294	0.424475	0.517125	0.0865144	0.0707034		CNNM	Channels/pores	4	i	Group II
F6HDL1	CBSDUF1	Putative uncharacterized protein	DUF21 domain-containing protein At4g14240	1.20894	0.196585	0.377127	0.498545	0.332165		CNNM	Channels/pores	3	fgi	Group I
F6HYJ2	VviTMN10	Transmembrane 9 superfamily member	Transmembrane 9 superfamily member 10	0.125496	0.675645	1.00551	1.08064	0.836893		EMP70	Accessory factors involved in transport	10		Group II
F6HCJ7	VviTMN11	Transmembrane 9 superfamily member	Transmembrane 9 superfamily member 11	0.344611	0.702384	1.14198	1.88782	3.54257		EMP70	Accessory factors involved in transport	10	i	Group III
D7TGZ4	VviTMN1	Transmembrane 9 superfamily member	Transmembrane 9 superfamily member 1	0.205807	0.807648	2.04989	2.32664	4.72327		EMP70	Accessory factors involved in transport	10	fg	Group III
D7T8E1	VviTMN3	Transmembrane 9 superfamily member	Transmembrane 9 superfamily member 3	0.0937159	1.43023	3.37689	4.46948	3.0158		EMP70	Accessory factors involved in transport	10	efi	Group III
A5BV91	VviTMN7	Transmembrane 9 superfamily member	Transmembrane 9 superfamily member 7	0.12999	0.701844	1.62035	2.00502	2.17982		EMP70	Accessory factors involved in transport	10	ef	Group III
F6HT63	GN	Putative uncharacterized protein	ARF guanine-nucleotide exchange factor GNOM	6.14953	1.34048	2.19915	5.32726	4.8295		PPI	Primary active transporters	0		Group I
D7SVQ2	TOM20-3	Putative uncharacterized protein	Mitochondrial import receptor subunit TOM20-3	0.0665242	0.281152	0.0682937	0.0653847	0.0704032		Unclassified	Channels/pores	1		Group II
F6GUY8	TOC75-3	Putative uncharacterized protein	Protein TOC75-3, chloroplastic	0.876295	3.71427	5.42583	3.99621	5.04129		OmpIP	Channels/pores	0	efg	Group II
D7T2M4	OEP37	Putative uncharacterized protein	Outer envelope pore protein 37, chloroplastic	0.107432	0.449856	0.336544	0.0956718	0.306429		OEP37	Channels/pores	0	bfg	Group II
E0CQ31	OEP24B	Putative uncharacterized protein	Outer envelope pore protein 24B, chloroplastic	0.688743	0.793124	1.31046	0.822197	1.11309		OEP24	Channels/pores	0	i	Group II
F6GV11	OEP161	Putative uncharacterized protein	Outer envelope pore protein 16-1, chloroplastic	1.02186	2.68414	4.12435	3.42917	1.85777		OEP16	Channels/pores	0	afg	Group II
F6HLK8	OEP163	Putative uncharacterized protein	Outer envelope pore protein 16-3, chloroplastic/mitochondrial	2.03583	3.42761	3.84828	3.76794	4.08451		OEP16	Channels/pores	3	i	Group II
F6H7A7	HP30-2	Putative uncharacterized protein	Mitochondrial import inner membrane translocase subunit Tim17/Tim22/Tim23 family protein	0.548203	1.36455	0.89959	0.740421	0.221568		MPT	Primary active transporters	0	cef	Group II
D7TY71	TOM40-1	Putative uncharacterized protein	Mitochondrial import receptor subunit TOM40-1	1.01542	4.63467	6.72025	5.45147	10.4782		MPP	Channels/pores	0	befg	Group III
F6HPF2	VDAC1	Putative uncharacterized protein	Mitochondrial outer membrane protein porin 1	3.34138	16.3843	18.0126	15.4467	35.4615		MPP	Channels/pores	0	abefg	Group III
A5BE54	VDAC1	Putative uncharacterized protein	Mitochondrial outer membrane protein porin 1	3.14327	9.32717	11.6308	10.5649	15.8381		MPP	Channels/pores	0	abefg	Group III
A5AQ65	VDAC2	Putative uncharacterized protein	Mitochondrial outer membrane protein porin 2	8.36381	17.4037	29.0287	17.0639	30.6175		MPP	Channels/pores	0	efgi	Group III
D7SQ96	VDAC4	Putative uncharacterized protein	Mitochondrial outer membrane protein porin 4	0.789471	1.65975	2.32169	1.70322	4.06805		MPP	Channels/pores	0	g	Group III
F6I7N1	MPC4	Mitochondrial pyruvate carrier	Mitochondrial pyruvate carrier 4	0.196114	1.69732	1.48217	3.25211	4.50259		MPC	Electrochemical Potential-driven Tranporters	0		Group III
E0CNP5	MPC4	Mitochondrial pyruvate carrier	Mitochondrial pyruvate carrier 4	0.321095	0.358295	0.405204	0.532229	0.324305		MPC	Electrochemical Potential-driven Tranporters	1		Group III
F6H246	At1g53035	Putative uncharacterized protein	Transmembrane protein	0.462839	0.871483	1.09322	1.66517	2.65997		MC	Electrochemical Potential-driven Tranporters	4		Group III
F6H312	BT1	Putative uncharacterized protein	Adenine nucleotide transporter BT1, chloroplastic/mitochondrial	0.176976	0.276231	0.176155	0.132087	0.1196		MC	Electrochemical Potential-driven Tranporters	0		Group II
F6HBF2	AAC2	Putative uncharacterized protein	ADP,ATP carrier protein 2, mitochondrial	42.5222	96.5741	80.2165	102.208	123.68		MC	Electrochemical Potential-driven Tranporters	3	efgi	Group III
F6H5F0	AAC3	Putative uncharacterized protein	ADP,ATP carrier protein 3, mitochondrial	6.36498	17.2277	16.2709	20.2029	15.7831		MC	Electrochemical Potential-driven Tranporters	3	f	Group II
F6HYZ0	PNC1	Putative uncharacterized protein	Peroxisomal adenine nucleotide carrier 1	0.122912	0.166012	0.200947	1.04437	0.462682		MC	Electrochemical Potential-driven Tranporters	0		Group III
F6GU55	AAC2	Putative uncharacterized protein	ADP,ATP carrier protein 2, mitochondrial	4.35499	8.21554	6.67285	7.1475	5.77699		MC	Electrochemical Potential-driven Tranporters	3	efgi	Group II
A5C3N2	PUMP5	Putative uncharacterized protein	Mitochondrial uncoupling protein 5	1.06281	0.727118	1.5479	3.47048	1.5272		MC	Electrochemical Potential-driven Tranporters	0		Group III
D7THC4	PUMP1	Putative uncharacterized protein	Mitochondrial uncoupling protein 1	5.16384	9.87372	11.2448	7.19255	6.6089		MC	Electrochemical Potential-driven Tranporters	0	ef	Group II
D7T6E5	At5g48970	Putative uncharacterized protein	Mitochondrial thiamine diphosphate carrier 2	0.0755478	0.0738946	0.0452748	0.107425	0.119266		MC	Electrochemical Potential-driven Tranporters	0		Group III
F6GT37	MPT3	Putative uncharacterized protein	Mitochondrial phosphate carrier protein 3, mitochondrial	14.1289	22.5005	37.4305	54.3569	100.667		MC	Electrochemical Potential-driven Tranporters	0	efg	Group III
F6H440	MPT3	Putative uncharacterized protein	Mitochondrial phosphate carrier protein 3, mitochondrial	2.43707	5.0502	7.35813	8.08512	9.77478		MC	Electrochemical Potential-driven Tranporters	0	efg	Group III
F6GUN2	DTC	Putative uncharacterized protein	Mitochondrial dicarboxylate/tricarboxylate transporter DTC	19.6843	38.8398	42.5689	32.3297	48.8056		MC	Electrochemical Potential-driven Tranporters	0	efg	Group III
F6HLE5	DTC	Putative uncharacterized protein	Mitochondrial dicarboxylate/tricarboxylate transporter DTC	0.751062	2.57366	4.78686	2.07119	3.10152		MC	Electrochemical Potential-driven Tranporters	0	efg	Group II
F6HT95	BOU	Putative uncharacterized protein	Mitochondrial carnitine/acylcarnitine carrier-like protein	1.37441	3.21955	2.42277	2.31045	1.85023		MC	Electrochemical Potential-driven Tranporters	0	fg	Group II
F6GU44	DIT1	Putative uncharacterized protein	Dicarboxylate transporter 1, chloroplastic	0.431904	0.982411	1.02726	1.19594	1.09659		DASS	Electrochemical Potential-driven Tranporters	13		Group II
F6HTH8	DIT2-1	Putative uncharacterized protein	Dicarboxylate transporter 2.1, chloroplastic	0.140373	0.543394	0.479352	0.413665	0.251121		DASS	Electrochemical Potential-driven Tranporters	9		Group II
D7SJM2	TIC110	Putative uncharacterized protein	Protein TIC110, chloroplastic	0.906492	1.66869	1.21229	0.831288	0.572752		CEPT or Tic-Toc	Primary active transporters	2	f	Group II
D7SJB1	OEP64	Putative uncharacterized protein	Outer envelope protein 64, chloroplastic	0.0631234	0.122722	0.783738	1.1152	1.10835		CEPT or Tic-Toc	Primary active transporters	1		Group III
F6HX76	VviAATP1	ADP,ATP carrier protein	ADP,ATP carrier protein 1, chloroplastic	0.0487229	0.0880199	0.541795	0.987687	1.00269		AAA	Electrochemical Potential-driven Tranporters	11		Group III
D7UDD6	OEP21B	Putative uncharacterized protein	Outer envelope pore protein 21B, chloroplastic	0.534386	1.11094	1.18884	0.745835	0.656231		OEP21	Channels/pores	0		Group II
D7T7Q3	At5g16930	Putative uncharacterized protein	AAA-type ATPase family protein	0.345744	1.16567	0.992978	1.15223	0.874258		Bcs1	Primary active transporters	0	i	Group II
D7SQA0	At5g57480	Putative uncharacterized protein	AAA-ATPase At5g57480	0.0646658	0.0659461	0.105109	1.05538	1.56168		Bcs1	Primary active transporters	1		Group III
